# Supplementary material for: G-quadruplex-proximity protein labeling based on peroxidase activity
Source: Royal Society of Chemistry journal article supplement (doi:10.1039/d0cc02571b), 2020-01-01
Supplement: d0cc02571b1.xlsx [file d0cc02571b1.xlsx]

## Sheet: Figure 4
Protein FDR Confidence Combined	Master	UniProt Accession	Description	Exp q-value Combined	Sum PEP Score	Coverage in Percent	Number of Peptides	Number of PSMs	Number of Unique Peptides	MW in kDa	calc pI	Score Sequest HT A2 Sequest HT	Abundance Ratio	Gene Symbol	Nucleotide binding type	Nucleotide binding	RNA binding
High	IsMasterProtein	P0CG39	POTE ankyrin domain family member J OS=Homo sapiens OX=9606 GN=POTEJ PE=3 SV=1	0	36.115	8	5	66	2	117.3	5.97	165.3	100	POTEJ
High	IsMasterProtein	P12236	ADP/ATP translocase 3 OS=Homo sapiens OX=9606 GN=SLC25A6 PE=1 SV=4	0	16.326	16	5	24	1	32.8	9.74	27.74	100	SLC25A6	ADP	1
High	IsMasterProtein	A6NHL2	Tubulin alpha chain-like 3 OS=Homo sapiens OX=9606 GN=TUBAL3 PE=1 SV=2	0	12.533	7	3	20	1	49.9	6.05	32	100	TUBAL3	GTP	1
High	IsMasterProtein	O43865	S-adenosylhomocysteine hydrolase-like protein 1 OS=Homo sapiens OX=9606 GN=AHCYL1 PE=1 SV=2	0	16.797	4	3	16	1	58.9	6.89	30.11	100	AHCYL1	NAD	1
High	IsMasterProtein	Q9Y6E2	Basic leucine zipper and W2 domain-containing protein 2 OS=Homo sapiens OX=9606 GN=BZW2 PE=1 SV=1	0	24.284	7	3	12	1	48.1	6.68	24.13	100	BZW2
High	IsMasterProtein	P11021	Endoplasmic reticulum chaperone BiP OS=Homo sapiens OX=9606 GN=HSPA5 PE=1 SV=2	0	21.305	6	3	9	1	72.3	5.16	31.21	100	HSPA5	ATP	1
High	IsMasterProtein	P67775	Serine/threonine-protein phosphatase 2A catalytic subunit alpha isoform OS=Homo sapiens OX=9606 GN=PPP2CA PE=1 SV=1	0	21.257	14	3	7	3	35.6	5.54	21.58	100	PPP2CA
High	IsMasterProtein	O14929	Histone acetyltransferase type B catalytic subunit OS=Homo sapiens OX=9606 GN=HAT1 PE=1 SV=1	0	9.136	8	2	6	2	49.5	5.69	6.24	100	HAT1	(histone)
High	IsMasterProtein	Q9NY33	Dipeptidyl peptidase 3 OS=Homo sapiens OX=9606 GN=DPP3 PE=1 SV=2	0	12.587	5	2	4	2	82.5	5.1	9.76	100	DPP3
High	IsMasterProtein	P35232	Prohibitin OS=Homo sapiens OX=9606 GN=PHB PE=1 SV=1	0	7.228	7	2	4	2	29.8	5.76	10.52	100	PHB
High	IsMasterProtein	Q13155	Aminoacyl tRNA synthase complex-interacting multifunctional protein 2 OS=Homo sapiens OX=9606 GN=AIMP2 PE=1 SV=2	0	9.794	10	2	4	2	35.3	8.22	6.52	100	AIMP2
High	IsMasterProtein	P30876	DNA-directed RNA polymerase II subunit RPB2 OS=Homo sapiens OX=9606 GN=POLR2B PE=1 SV=1	0	13.835	4	2	4	2	133.8	6.87	10.78	100	POLR2B	RNA	1	1
High	IsMasterProtein	O60256	Phosphoribosyl pyrophosphate synthase-associated protein 2 OS=Homo sapiens OX=9606 GN=PRPSAP2 PE=1 SV=1	0	6.306	8	2	4	1	40.9	7.44	6.56	100	PRPSAP2	(phoshphoribosyl pyrophosphate)
High	IsMasterProtein	P22087	rRNA 2'-O-methyltransferase fibrillarin OS=Homo sapiens OX=9606 GN=FBL PE=1 SV=2	0	6.594	10	2	4	2	33.8	10.18	9.74	100	FBL	RNA	1	1
High	IsMasterProtein	O43399	Tumor protein D54 OS=Homo sapiens OX=9606 GN=TPD52L2 PE=1 SV=2	0	10.249	14	2	3	2	22.2	5.36	7.55	100	TPD52L2	RNA	1	1
High	IsMasterProtein	O60488	Long-chain-fatty-acid--CoA ligase 4 OS=Homo sapiens OX=9606 GN=ACSL4 PE=1 SV=2	0	5.109	4	2	3	2	79.1	8.38	1.97	100	ACSL4	ATP	1
High	IsMasterProtein	O75947	ATP synthase subunit d, mitochondrial OS=Homo sapiens OX=9606 GN=ATP5PD PE=1 SV=3	0	7.1	16	2	3	2	18.5	5.3	2.34	100	ATP5H
High	IsMasterProtein	Q13144	Translation initiation factor eIF-2B subunit epsilon OS=Homo sapiens OX=9606 GN=EIF2B5 PE=1 SV=3	0	6.436	5	3	3	3	80.3	5.08	4.17	100	EIF2B5
High	IsMasterProtein	P25398	40S ribosomal protein S12 OS=Homo sapiens OX=9606 GN=RPS12 PE=1 SV=3	0	5.426	20	2	3	2	14.5	7.21	7.13	100	RPS12	RNA	1	1
High	IsMasterProtein	Q9BQ67	Glutamate-rich WD repeat-containing protein 1 OS=Homo sapiens OX=9606 GN=GRWD1 PE=1 SV=1	0	7.699	7	2	2	2	49.4	4.92	5.28	100	GRWD1	RNA	1	1
High	IsMasterProtein	Q9Y263	Phospholipase A-2-activating protein OS=Homo sapiens OX=9606 GN=PLAA PE=1 SV=2	0	11.545	5	2	2	2	87.1	6.37	2.23	100	PLAA	(phospholipase)
High	IsMasterProtein	Q9UNH7	Sorting nexin-6 OS=Homo sapiens OX=9606 GN=SNX6 PE=1 SV=1	0	5.642	7	2	2	2	46.6	6.16	2.36	100	SNX6	(phosphatidylinositol)
High	IsMasterProtein	P46459	Vesicle-fusing ATPase OS=Homo sapiens OX=9606 GN=NSF PE=1 SV=3	0	7.758	3	2	2	2	82.5	6.95	3.43	100	NSF	ATP	1
High	IsMasterProtein	P55039	Developmentally-regulated GTP-binding protein 2 OS=Homo sapiens OX=9606 GN=DRG2 PE=1 SV=1	0	6.119	7	2	2	2	40.7	8.88	1.6	100	DRG2	GTP	1
High	IsMasterProtein	Q71U36	Tubulin alpha-1A chain OS=Homo sapiens OX=9606 GN=TUBA1A PE=1 SV=1	0	157.376	49	17	193	1	50.1	5.06	541.45	30.869	TUBA1A	GTP	1
High	IsMasterProtein	Q9Y224	RNA transcription, translation and transport factor protein OS=Homo sapiens OX=9606 GN=RTRAF PE=1 SV=1	0	9.903	10	2	3	2	28.1	6.65	2.82	11.834	C14orf166; RTRAF	RNA	1	1
High	IsMasterProtein	Q9P0L0	Vesicle-associated membrane protein-associated protein A OS=Homo sapiens OX=9606 GN=VAPA PE=1 SV=3	0	21.28	15	3	12	3	27.9	8.62	40.59	10.819	VAPA
High	IsMasterProtein	Q13126	S-methyl-5'-thioadenosine phosphorylase OS=Homo sapiens OX=9606 GN=MTAP PE=1 SV=2	0	16.271	12	2	7	2	31.2	7.18	12.75	9.753	MTAP
High	IsMasterProtein	P55010	Eukaryotic translation initiation factor 5 OS=Homo sapiens OX=9606 GN=EIF5 PE=1 SV=2	0	33.886	16	6	18	6	49.2	5.58	43.47	8.891	EIF5	RNA	1	1
High	IsMasterProtein	P24752	Acetyl-CoA acetyltransferase, mitochondrial OS=Homo sapiens OX=9606 GN=ACAT1 PE=1 SV=1	0	16.529	12	4	6	4	45.2	8.85	17.5	8.483	ACAT1
High	IsMasterProtein	Q6NXE6	Armadillo repeat-containing protein 6 OS=Homo sapiens OX=9606 GN=ARMC6 PE=1 SV=2	0	9.512	5	2	4	2	54.1	6.24	10.06	8.286	ARMC6
High	IsMasterProtein	P29692	Elongation factor 1-delta OS=Homo sapiens OX=9606 GN=EEF1D PE=1 SV=5	0	23.299	13	2	5	2	31.1	5.01	19.28	7.758	EEF1D	RNA	1	1
High	IsMasterProtein	O95757	Heat shock 70 kDa protein 4L OS=Homo sapiens OX=9606 GN=HSPA4L PE=1 SV=3	0	13.279	5	3	6	3	94.5	5.88	13.54	7.643	HSPA4L	ATP	1
High	IsMasterProtein	Q04837	Single-stranded DNA-binding protein, mitochondrial OS=Homo sapiens OX=9606 GN=SSBP1 PE=1 SV=1	0	10.511	16	2	5	2	17.2	9.6	11.53	7.262	SSBP1	RNA	1	1
High	IsMasterProtein	A6NKT7	RanBP2-like and GRIP domain-containing protein 3 OS=Homo sapiens OX=9606 GN=RGPD3 PE=3 SV=2	0	6.502	1	2	3	2	197.4	6.33	2.25	7.091	RGPD3
High	IsMasterProtein	P17980	26S proteasome regulatory subunit 6A OS=Homo sapiens OX=9606 GN=PSMC3 PE=1 SV=3	0	46.214	29	9	37	9	49.2	5.24	85.39	6.917	PSMC3	ATP	1
High	IsMasterProtein	Q9BTT0	Acidic leucine-rich nuclear phosphoprotein 32 family member E OS=Homo sapiens OX=9606 GN=ANP32E PE=1 SV=1	0	11.03	10	2	4	2	30.7	3.85	6.04	6.727	ANP32E	(histone)
High	IsMasterProtein	P55735	Protein SEC13 homolog OS=Homo sapiens OX=9606 GN=SEC13 PE=1 SV=3	0	11.082	8	2	5	2	35.5	5.48	12.8	6.523	SEC13	RNA	1	1
High	IsMasterProtein	Q96P70	Importin-9 OS=Homo sapiens OX=9606 GN=IPO9 PE=1 SV=3	0	9.378	5	3	7	3	115.9	4.81	4.94	6.093	IPO9	(histone)
High	IsMasterProtein	P54886	Delta-1-pyrroline-5-carboxylate synthase OS=Homo sapiens OX=9606 GN=ALDH18A1 PE=1 SV=2	0	19.353	7	4	5	4	87.2	7.12	11.71	6.008	ALDH18A1	ATP	1
High	IsMasterProtein	P38159	RNA-binding motif protein, X chromosome OS=Homo sapiens OX=9606 GN=RBMX PE=1 SV=3	0	23.451	20	7	15	7	42.3	10.05	24.6	5.943	RBMX	RNA	1	1
High	IsMasterProtein	P12814	Alpha-actinin-1 OS=Homo sapiens OX=9606 GN=ACTN1 PE=1 SV=2	0	37.417	9	6	20	2	103	5.41	55.17	5.869	ACTN1
High	IsMasterProtein	Q9GZS3	WD repeat-containing protein 61 OS=Homo sapiens OX=9606 GN=WDR61 PE=1 SV=1	0	12.461	8	2	6	2	33.6	5.47	15.82	5.835	WDR61
High	IsMasterProtein	Q16576	Histone-binding protein RBBP7 OS=Homo sapiens OX=9606 GN=RBBP7 PE=1 SV=1	0	20.084	10	4	10	4	47.8	5.05	26.07	5.747	RBBP7	RNA	1	1
High	IsMasterProtein	Q9Y3F4	Serine-threonine kinase receptor-associated protein OS=Homo sapiens OX=9606 GN=STRAP PE=1 SV=1	0	58.137	32	9	27	9	38.4	5.12	56.27	5.7	STRAP	RNA	1	1
High	IsMasterProtein	P24666	Low molecular weight phosphotyrosine protein phosphatase OS=Homo sapiens OX=9606 GN=ACP1 PE=1 SV=3	0	27.336	31	4	14	4	18	6.74	41.07	5.685	ACP1
High	IsMasterProtein	O15143	Actin-related protein 2/3 complex subunit 1B OS=Homo sapiens OX=9606 GN=ARPC1B PE=1 SV=3	0	15.508	13	3	3	3	40.9	8.35	7.22	5.655	ARPC1B
High	IsMasterProtein	P48643	T-complex protein 1 subunit epsilon OS=Homo sapiens OX=9606 GN=CCT5 PE=1 SV=1	0	66.169	32	18	61	17	59.6	5.66	115.63	5.628	CCT5	RNA	1	1
High	IsMasterProtein	Q13200	26S proteasome non-ATPase regulatory subunit 2 OS=Homo sapiens OX=9606 GN=PSMD2 PE=1 SV=3	0	49.969	12	8	27	8	100.1	5.2	61.11	5.491	PSMD2
High	IsMasterProtein	P40227	T-complex protein 1 subunit zeta OS=Homo sapiens OX=9606 GN=CCT6A PE=1 SV=3	0	64.863	38	16	64	16	58	6.68	135.03	5.47	CCT6A	RNA	1	1
High	IsMasterProtein	P62191	26S proteasome regulatory subunit 4 OS=Homo sapiens OX=9606 GN=PSMC1 PE=1 SV=1	0	59.567	24	8	30	6	49.2	6.21	69.34	5.465	PSMC1	RNA	1	1
High	IsMasterProtein	P32119	Peroxiredoxin-2 OS=Homo sapiens OX=9606 GN=PRDX2 PE=1 SV=5	0	16.453	19	4	10	4	21.9	5.97	16.78	5.436	PRDX2
High	IsMasterProtein	P12004	Proliferating cell nuclear antigen OS=Homo sapiens OX=9606 GN=PCNA PE=1 SV=1	0	88.544	50	11	62	11	28.8	4.69	151.09	5.4	PCNA	DNA	1
High	IsMasterProtein	P05783	Keratin, type I cytoskeletal 18 OS=Homo sapiens OX=9606 GN=KRT18 PE=1 SV=2	0	85.507	37	13	66	12	48	5.45	155.44	5.331	KRT18	RNA	1	1
High	IsMasterProtein	P17987	T-complex protein 1 subunit alpha OS=Homo sapiens OX=9606 GN=TCP1 PE=1 SV=1	0	78.616	30	14	54	14	60.3	6.11	120.07	5.283	TCP1	ATP	1
High	IsMasterProtein	P47914	60S ribosomal protein L29 OS=Homo sapiens OX=9606 GN=RPL29 PE=1 SV=2	0	11.939	14	2	6	2	17.7	11.66	11.65	5.226	RPL29	RNA	1	1
High	IsMasterProtein	Q99714	3-hydroxyacyl-CoA dehydrogenase type-2 OS=Homo sapiens OX=9606 GN=HSD17B10 PE=1 SV=3	0	25.696	26	4	17	4	26.9	7.78	31.63	5.148	HSD17B10	NAD	1
High	IsMasterProtein	Q15365	Poly(rC)-binding protein 1 OS=Homo sapiens OX=9606 GN=PCBP1 PE=1 SV=2	0	47.421	25	7	25	4	37.5	7.09	61.13	4.996	PCBP1	RNA	1	1
High	IsMasterProtein	P30520	Adenylosuccinate synthetase isozyme 2 OS=Homo sapiens OX=9606 GN=ADSS2 PE=1 SV=3	0	47.319	24	8	21	8	50.1	6.55	43.94	4.914	ADSS	GTP	1
High	IsMasterProtein	P23246	Splicing factor, proline- and glutamine-rich OS=Homo sapiens OX=9606 GN=SFPQ PE=1 SV=2	0	27.152	8	6	15	5	76.1	9.44	34.62	4.909	SFPQ	RNA	1	1
High	IsMasterProtein	P05023	Sodium/potassium-transporting ATPase subunit alpha-1 OS=Homo sapiens OX=9606 GN=ATP1A1 PE=1 SV=1	0	26.64	6	5	8	5	112.8	5.49	15.99	4.908	ATP1A1	ATP	1
High	IsMasterProtein	Q52LJ0	Protein FAM98B OS=Homo sapiens OX=9606 GN=FAM98B PE=1 SV=2	0	21.222	10	4	10	4	45.5	8.69	22.53	4.896		RNA	1	1
High	IsMasterProtein	P78371	T-complex protein 1 subunit beta OS=Homo sapiens OX=9606 GN=CCT2 PE=1 SV=4	0	128.321	38	18	81	18	57.5	6.46	173.27	4.891	CCT2	ATP	1
High	IsMasterProtein	P36507	Dual specificity mitogen-activated protein kinase kinase 2 OS=Homo sapiens OX=9606 GN=MAP2K2 PE=1 SV=1	0	15.942	12	4	10	3	44.4	6.55	18.82	4.865	MAP2K2	ATP	1
High	IsMasterProtein	P22626	Heterogeneous nuclear ribonucleoproteins A2/B1 OS=Homo sapiens OX=9606 GN=HNRNPA2B1 PE=1 SV=2	0	96.37	39	12	77	10	37.4	8.95	198.82	4.842	HNRNPA2B1	RNA	1	1
High	IsMasterProtein	Q9UKN8	General transcription factor 3C polypeptide 4 OS=Homo sapiens OX=9606 GN=GTF3C4 PE=1 SV=2	0	11.887	4	2	4	2	91.9	6.65	9.83	4.82	GTF3C4	DNA	1
High	IsMasterProtein	P35579	Myosin-9 OS=Homo sapiens OX=9606 GN=MYH9 PE=1 SV=4	0	496.208	38	66	282	65	226.4	5.6	757.72	4.775	MYH9	RNA	1	1
High	IsMasterProtein	Q9Y5B9	FACT complex subunit SPT16 OS=Homo sapiens OX=9606 GN=SUPT16H PE=1 SV=1	0	6.721	3	2	3	2	119.8	5.66	8.64	4.759	SUPT16H	RNA	1	1
High	IsMasterProtein	P42766	60S ribosomal protein L35 OS=Homo sapiens OX=9606 GN=RPL35 PE=1 SV=2	0	7.638	15	2	12	2	14.5	11.05	26.48	4.745	RPL35	RNA	1	1
High	IsMasterProtein	P49915	GMP synthase [glutamine-hydrolyzing] OS=Homo sapiens OX=9606 GN=GMPS PE=1 SV=1	0	52.767	18	10	40	10	76.7	6.87	78.49	4.703	GMPS	ATP	1
High	IsMasterProtein	Q96KP4	Cytosolic non-specific dipeptidase OS=Homo sapiens OX=9606 GN=CNDP2 PE=1 SV=2	0	11.189	7	2	6	2	52.8	5.97	17.69	4.688	CNDP2
High	IsMasterProtein	P30101	Protein disulfide-isomerase A3 OS=Homo sapiens OX=9606 GN=PDIA3 PE=1 SV=4	0	23.7	9	3	8	3	56.7	6.35	21.08	4.682	PDIA3	RNA	1	1
High	IsMasterProtein	P60660	Myosin light polypeptide 6 OS=Homo sapiens OX=9606 GN=MYL6 PE=1 SV=2	0	35.715	38	6	30	6	16.9	4.65	71.91	4.668	MYL6
High	IsMasterProtein	P50991	T-complex protein 1 subunit delta OS=Homo sapiens OX=9606 GN=CCT4 PE=1 SV=4	0	108.165	33	16	82	15	57.9	7.83	198.97	4.667	CCT4	RNA	1	1
High	IsMasterProtein	P39748	Flap endonuclease 1 OS=Homo sapiens OX=9606 GN=FEN1 PE=1 SV=1	0	30.018	15	4	15	4	42.6	8.62	40.98	4.592	FEN1	DNA	1
High	IsMasterProtein	P08670	Vimentin OS=Homo sapiens OX=9606 GN=VIM PE=1 SV=4	0	104.417	39	18	80	16	53.6	5.12	174.9	4.582	VIM	DNA	1
High	IsMasterProtein	Q14839	Chromodomain-helicase-DNA-binding protein 4 OS=Homo sapiens OX=9606 GN=CHD4 PE=1 SV=2	0	4.673	2	3	4	3	217.9	5.86	4.25	4.534	CHD4	DNA	1
High	IsMasterProtein	P62829	60S ribosomal protein L23 OS=Homo sapiens OX=9606 GN=RPL23 PE=1 SV=1	0	25.033	38	4	21	4	14.9	10.51	41.12	4.518	RPL23	RNA	1	1
High	IsMasterProtein	Q04917	14-3-3 protein eta OS=Homo sapiens OX=9606 GN=YWHAH PE=1 SV=4	0	10.303	20	4	17	2	28.2	4.84	18.49	4.516	YWHAH
High	IsMasterProtein	P35637	RNA-binding protein FUS OS=Homo sapiens OX=9606 GN=FUS PE=1 SV=1	0	21.312	9	3	11	3	53.4	9.36	26.83	4.512	FUS	RNA	1	1
High	IsMasterProtein	P61163	Alpha-centractin OS=Homo sapiens OX=9606 GN=ACTR1A PE=1 SV=1	0	17.79	9	2	6	2	42.6	6.64	17.76	4.512	ACTR1A	ATP	1
High	IsMasterProtein	Q14247	Src substrate cortactin OS=Homo sapiens OX=9606 GN=CTTN PE=1 SV=2	0	6.143	5	2	5	2	61.5	5.4	7.19	4.448	CTTN
High	IsMasterProtein	P08237	ATP-dependent 6-phosphofructokinase, muscle type OS=Homo sapiens OX=9606 GN=PFKM PE=1 SV=2	0	39.273	13	8	19	7	85.1	7.99	35.56	4.419	PFKM	ATP	1
High	IsMasterProtein	Q9NZL9	Methionine adenosyltransferase 2 subunit beta OS=Homo sapiens OX=9606 GN=MAT2B PE=1 SV=1	0	13.36	10	3	8	3	37.5	7.36	18.02	4.411	MAT2B	NADP	1
High	IsMasterProtein	P06748	Nucleophosmin OS=Homo sapiens OX=9606 GN=NPM1 PE=1 SV=2	0	10.867	9	2	7	2	32.6	4.78	17.01	4.399	NPM1	RNA	1	1
High	IsMasterProtein	P30153	Serine/threonine-protein phosphatase 2A 65 kDa regulatory subunit A alpha isoform OS=Homo sapiens OX=9606 GN=PPP2R1A PE=1 SV=4	0	58.591	23	10	38	10	65.3	5.11	81.96	4.385	PPP2R1A
High	IsMasterProtein	Q00796	Sorbitol dehydrogenase OS=Homo sapiens OX=9606 GN=SORD PE=1 SV=4	0	45.728	24	7	21	7	38.3	7.97	66.03	4.372	SORD	NAD	1
High	IsMasterProtein	P61586	Transforming protein RhoA OS=Homo sapiens OX=9606 GN=RHOA PE=1 SV=1	0	32.327	32	5	19	5	21.8	6.1	39.64	4.368	RHOA	GTP	1
High	IsMasterProtein	P42765	3-ketoacyl-CoA thiolase, mitochondrial OS=Homo sapiens OX=9606 GN=ACAA2 PE=1 SV=2	0	38.856	22	6	15	6	41.9	8.09	43.46	4.361	ACAA2	RNA	1	1
High	IsMasterProtein	Q13247	Serine/arginine-rich splicing factor 6 OS=Homo sapiens OX=9606 GN=SRSF6 PE=1 SV=2	0	37.165	23	8	31	7	39.6	11.43	56.74	4.295	SRSF6	RNA	1	1
High	IsMasterProtein	P13489	Ribonuclease inhibitor OS=Homo sapiens OX=9606 GN=RNH1 PE=1 SV=2	0	28.739	12	4	11	4	49.9	4.82	32.24	4.274	RNH1	RNA	1	1
High	IsMasterProtein	Q9BUF5	Tubulin beta-6 chain OS=Homo sapiens OX=9606 GN=TUBB6 PE=1 SV=1	0	54.008	22	10	97	3	49.8	4.88	216.92	4.262	TUBB6	GTP	1
High	IsMasterProtein	P49189	4-trimethylaminobutyraldehyde dehydrogenase OS=Homo sapiens OX=9606 GN=ALDH9A1 PE=1 SV=3	0	36.4	19	8	26	8	53.8	5.87	46.48	4.256	ALDH9A1	NAD	1
High	IsMasterProtein	Q92597	Protein NDRG1 OS=Homo sapiens OX=9606 GN=NDRG1 PE=1 SV=1	0	15.418	8	2	6	2	42.8	5.82	21.24	4.256	NDRG1
High	IsMasterProtein	P07814	Bifunctional glutamate/proline--tRNA ligase OS=Homo sapiens OX=9606 GN=EPRS PE=1 SV=5	0	105.996	18	22	77	22	170.5	7.33	125.01	4.231	EPRS	RNA	1	1
High	IsMasterProtein	P31327	Carbamoyl-phosphate synthase [ammonia], mitochondrial OS=Homo sapiens OX=9606 GN=CPS1 PE=1 SV=2	0	202.205	30	37	166	36	164.8	6.74	342.01	4.22	CPS1	ATP	1
High	IsMasterProtein	Q15366	Poly(rC)-binding protein 2 OS=Homo sapiens OX=9606 GN=PCBP2 PE=1 SV=1	0	46.96	28	7	31	4	38.6	6.79	58.92	4.214	PCBP2	RNA	1	1
High	IsMasterProtein	P13073	Cytochrome c oxidase subunit 4 isoform 1, mitochondrial OS=Homo sapiens OX=9606 GN=COX4I1 PE=1 SV=1	0	4.77	12	2	2	2	19.6	9.51	3.32	4.206	COX4I1
High	IsMasterProtein	P08865	40S ribosomal protein SA OS=Homo sapiens OX=9606 GN=RPSA PE=1 SV=4	0	34.111	19	4	20	4	32.8	4.87	54.63	4.195	RPSA	RNA	1	1
High	IsMasterProtein	O00148	ATP-dependent RNA helicase DDX39A OS=Homo sapiens OX=9606 GN=DDX39A PE=1 SV=2	0	37.975	20	8	43	3	49.1	5.68	82.97	4.183	DDX39A	RNA	1	1
High	IsMasterProtein	P18754	Regulator of chromosome condensation OS=Homo sapiens OX=9606 GN=RCC1 PE=1 SV=1	0	25.053	19	6	12	6	44.9	7.52	18.95	4.14	RCC1	(histone)
High	IsMasterProtein	P10809	60 kDa heat shock protein, mitochondrial OS=Homo sapiens OX=9606 GN=HSPD1 PE=1 SV=2	0	131.477	40	19	104	19	61	5.87	255.02	4.133	HSPD1	RNA	1	1
High	IsMasterProtein	P49368	T-complex protein 1 subunit gamma OS=Homo sapiens OX=9606 GN=CCT3 PE=1 SV=4	0	146.011	48	22	106	22	60.5	6.49	239.97	4.12	CCT3	RNA	1	1
High	IsMasterProtein	P52597	Heterogeneous nuclear ribonucleoprotein F OS=Homo sapiens OX=9606 GN=HNRNPF PE=1 SV=3	0	80.803	25	7	52	5	45.6	5.58	137.76	4.099	HNRNPF	RNA	1	1
High	IsMasterProtein	P53396	ATP-citrate synthase OS=Homo sapiens OX=9606 GN=ACLY PE=1 SV=3	0	108.366	23	20	76	20	120.8	7.33	171.63	4.087	ACLY	ATP	1
High	IsMasterProtein	Q9HAV4	Exportin-5 OS=Homo sapiens OX=9606 GN=XPO5 PE=1 SV=1	0	15.803	5	4	7	4	136.2	5.8	7.66	4.073	XPO5	RNA	1	1
High	IsMasterProtein	P51991	Heterogeneous nuclear ribonucleoprotein A3 OS=Homo sapiens OX=9606 GN=HNRNPA3 PE=1 SV=2	0	46.186	26	8	31	7	39.6	9.01	59.31	4.049	HNRNPA3	RNA	1	1
High	IsMasterProtein	Q12904	Aminoacyl tRNA synthase complex-interacting multifunctional protein 1 OS=Homo sapiens OX=9606 GN=AIMP1 PE=1 SV=2	0	9.555	9	2	8	2	34.3	8.43	19.49	4.032	AIMP1	RNA	1	1
High	IsMasterProtein	O43396	Thioredoxin-like protein 1 OS=Homo sapiens OX=9606 GN=TXNL1 PE=1 SV=3	0	30.437	21	4	14	4	32.2	4.96	38.84	4.031	TXNL1
High	IsMasterProtein	P12268	Inosine-5'-monophosphate dehydrogenase 2 OS=Homo sapiens OX=9606 GN=IMPDH2 PE=1 SV=2	0	17.26	9	4	16	4	55.8	6.9	38.13	4.012	IMPDH2	NAD	1
High	IsMasterProtein	Q16762	Thiosulfate sulfurtransferase OS=Homo sapiens OX=9606 GN=TST PE=1 SV=4	0	6.414	10	2	2	2	33.4	7.25	2.63	4.002	TST	RNA	1	1
High	IsMasterProtein	P61221	ATP-binding cassette sub-family E member 1 OS=Homo sapiens OX=9606 GN=ABCE1 PE=1 SV=1	0	40.408	14	7	24	7	67.3	8.34	60.81	4	ABCE1	ATP	1
High	IsMasterProtein	Q13547	Histone deacetylase 1 OS=Homo sapiens OX=9606 GN=HDAC1 PE=1 SV=1	0	22.479	11	5	23	1	55.1	5.48	49.64	3.998	HDAC1	(histone)
High	IsMasterProtein	Q99832	T-complex protein 1 subunit eta OS=Homo sapiens OX=9606 GN=CCT7 PE=1 SV=2	0	110.158	36	17	101	17	59.3	7.65	214.81	3.981	CCT7	ATP	1
High	IsMasterProtein	P62266	40S ribosomal protein S23 OS=Homo sapiens OX=9606 GN=RPS23 PE=1 SV=3	0	17.734	22	4	13	4	15.8	10.49	36.94	3.978	RPS23	RNA	1	1
High	IsMasterProtein	Q13148	TAR DNA-binding protein 43 OS=Homo sapiens OX=9606 GN=TARDBP PE=1 SV=1	0	25.892	9	3	16	3	44.7	6.19	27.07	3.964	TARDBP	RNA	1	1
High	IsMasterProtein	Q8TDN6	Ribosome biogenesis protein BRX1 homolog OS=Homo sapiens OX=9606 GN=BRIX1 PE=1 SV=2	0	7.169	7	3	7	3	41.4	9.92	9.06	3.956	BRIX1	RNA	1	1
High	IsMasterProtein	O60701	UDP-glucose 6-dehydrogenase OS=Homo sapiens OX=9606 GN=UGDH PE=1 SV=1	0	16.4	9	3	6	3	55	7.12	13.48	3.911	UGDH	NAD	1
High	IsMasterProtein	O43172	U4/U6 small nuclear ribonucleoprotein Prp4 OS=Homo sapiens OX=9606 GN=PRPF4 PE=1 SV=2	0	12.345	7	3	5	3	58.4	7.42	8.1	3.904	PRPF4	RNA	1	1
High	IsMasterProtein	P16152	Carbonyl reductase [NADPH] 1 OS=Homo sapiens OX=9606 GN=CBR1 PE=1 SV=3	0	30.726	26	5	13	5	30.4	8.32	33.17	3.856	CBR1; SETD4	NADP	1
High	IsMasterProtein	Q99729	Heterogeneous nuclear ribonucleoprotein A/B OS=Homo sapiens OX=9606 GN=HNRNPAB PE=1 SV=2	0	11.498	7	2	7	1	36.2	8.21	8.55	3.854	HNRNPAB	RNA	1	1
High	IsMasterProtein	O76003	Glutaredoxin-3 OS=Homo sapiens OX=9606 GN=GLRX3 PE=1 SV=2	0	24.422	17	5	18	5	37.4	5.39	43.93	3.846	GLRX3	RNA	1	1
High	IsMasterProtein	P62879	Guanine nucleotide-binding protein G(I)/G(S)/G(T) subunit beta-2 OS=Homo sapiens OX=9606 GN=GNB2 PE=1 SV=3	0	9.491	6	2	4	2	37.3	6	12.8	3.846	GNB2
High	IsMasterProtein	P50990	T-complex protein 1 subunit theta OS=Homo sapiens OX=9606 GN=CCT8 PE=1 SV=4	0	103.178	42	19	81	19	59.6	5.6	168.49	3.842	CCT8	ATP	1
High	IsMasterProtein	P14618	Pyruvate kinase PKM OS=Homo sapiens OX=9606 GN=PKM PE=1 SV=4	0	276.359	63	28	296	27	57.9	7.84	889.64	3.835	PKM	RNA	1	1
High	IsMasterProtein	P62633	Cellular nucleic acid-binding protein OS=Homo sapiens OX=9606 GN=CNBP PE=1 SV=1	0	12.536	15	2	4	2	19.5	7.71	4.53	3.827	CNBP	RNA	1	1
High	IsMasterProtein	Q9NUQ9	Protein FAM49B OS=Homo sapiens OX=9606 GN=FAM49B PE=1 SV=1	0	18.808	15	3	7	3	36.7	6.06	15.75	3.82	FAM49B
High	IsMasterProtein	Q13263	Transcription intermediary factor 1-beta OS=Homo sapiens OX=9606 GN=TRIM28 PE=1 SV=5	0	54.632	14	10	53	10	88.5	5.77	128.74	3.817	TRIM28	RNA	1	1
High	IsMasterProtein	Q9UQ80	Proliferation-associated protein 2G4 OS=Homo sapiens OX=9606 GN=PA2G4 PE=1 SV=3	0	51.347	30	12	71	12	43.8	6.55	150.58	3.793	PA2G4	RNA	1	1
High	IsMasterProtein	P07437	Tubulin beta chain OS=Homo sapiens OX=9606 GN=TUBB PE=1 SV=2	0	151.138	39	16	332	2	49.6	4.89	820.97	3.783	TUBB	GTP	1
High	IsMasterProtein	P49327	Fatty acid synthase OS=Homo sapiens OX=9606 GN=FASN PE=1 SV=3	0	278.355	23	46	181	45	273.3	6.44	441.66	3.783	FASN	RNA	1	1
High	IsMasterProtein	P52272	Heterogeneous nuclear ribonucleoprotein M OS=Homo sapiens OX=9606 GN=HNRNPM PE=1 SV=3	0	66.146	24	15	46	15	77.5	8.7	96.76	3.774	HNRNPM	RNA	1	1
High	IsMasterProtein	Q7L014	Probable ATP-dependent RNA helicase DDX46 OS=Homo sapiens OX=9606 GN=DDX46 PE=1 SV=2	0	53.25	14	13	39	13	117.3	9.29	68.01	3.774	DDX46	RNA	1	1
High	IsMasterProtein	P61081	NEDD8-conjugating enzyme Ubc12 OS=Homo sapiens OX=9606 GN=UBE2M PE=1 SV=1	0	16.047	25	4	18	4	20.9	7.69	27.9	3.769	UBE2M	ATP	1
High	IsMasterProtein	P50213	Isocitrate dehydrogenase [NAD] subunit alpha, mitochondrial OS=Homo sapiens OX=9606 GN=IDH3A PE=1 SV=1	0	16.729	12	3	11	3	39.6	6.92	26.97	3.734	IDH3A	NAD	1
High	IsMasterProtein	P46060	Ran GTPase-activating protein 1 OS=Homo sapiens OX=9606 GN=RANGAP1 PE=1 SV=1	0	13.984	6	3	7	3	63.5	4.68	17.29	3.707	RANGAP1	RNA	1	1
High	IsMasterProtein	P00558	Phosphoglycerate kinase 1 OS=Homo sapiens OX=9606 GN=PGK1 PE=1 SV=3	0	210.978	59	23	160	23	44.6	8.1	403.7	3.704	PGK1	ATP	1
High	IsMasterProtein	P14866	Heterogeneous nuclear ribonucleoprotein L OS=Homo sapiens OX=9606 GN=HNRNPL PE=1 SV=2	0	127.458	40	15	64	15	64.1	8.22	183.45	3.666	HNRNPL	RNA	1	1
High	IsMasterProtein	P13807	Glycogen [starch] synthase, muscle OS=Homo sapiens OX=9606 GN=GYS1 PE=1 SV=2	0	11.385	3	2	5	2	83.7	6.18	11.76	3.661	GYS1	UDP-glucose	1
High	IsMasterProtein	P52789	Hexokinase-2 OS=Homo sapiens OX=9606 GN=HK2 PE=1 SV=2	0	31.75	10	7	13	7	102.3	6.05	24.88	3.645	HK2	ATP	1
High	IsMasterProtein	Q9H0A0	RNA cytidine acetyltransferase OS=Homo sapiens OX=9606 GN=NAT10 PE=1 SV=2	0	20.364	7	6	11	6	115.7	8.27	12.51	3.644	NAT10	RNA	1	1
High	IsMasterProtein	Q16719	Kynureninase OS=Homo sapiens OX=9606 GN=KYNU PE=1 SV=1	0	58.101	22	10	46	10	52.3	7.03	107.68	3.63	KYNU
High	IsMasterProtein	Q00610	Clathrin heavy chain 1 OS=Homo sapiens OX=9606 GN=CLTC PE=1 SV=5	0	219.953	23	29	109	29	191.5	5.69	288.75	3.629	CLTC	RNA	1	1
High	IsMasterProtein	Q9BXP5	Serrate RNA effector molecule homolog OS=Homo sapiens OX=9606 GN=SRRT PE=1 SV=1	0	18.654	7	6	15	6	100.6	5.96	17.9	3.629	SRRT	RNA	1	1
High	IsMasterProtein	Q00325	Phosphate carrier protein, mitochondrial OS=Homo sapiens OX=9606 GN=SLC25A3 PE=1 SV=2	0	8.479	6	2	6	2	40.1	9.38	7.3	3.619	SLC25A3
High	IsMasterProtein	Q15424	Scaffold attachment factor B1 OS=Homo sapiens OX=9606 GN=SAFB PE=1 SV=4	0	4.903	2	2	6	2	102.6	5.47	14.46	3.619	SAFB	RNA	1	1
High	IsMasterProtein	P00492	Hypoxanthine-guanine phosphoribosyltransferase OS=Homo sapiens OX=9606 GN=HPRT1 PE=1 SV=2	0	36.186	38	7	30	7	24.6	6.68	68.89	3.612	HPRT1	GMP	1
High	IsMasterProtein	P31943	Heterogeneous nuclear ribonucleoprotein H OS=Homo sapiens OX=9606 GN=HNRNPH1 PE=1 SV=4	0	113.685	42	13	73	5	49.2	6.3	211.11	3.611	HNRNPH1	RNA	1	1
High	IsMasterProtein	P60891	Ribose-phosphate pyrophosphokinase 1 OS=Homo sapiens OX=9606 GN=PRPS1 PE=1 SV=2	0	45.805	25	6	26	4	34.8	6.98	72.39	3.593	PRPS1	ATP	1
High	IsMasterProtein	P55795	Heterogeneous nuclear ribonucleoprotein H2 OS=Homo sapiens OX=9606 GN=HNRNPH2 PE=1 SV=1	0	70.45	32	11	63	4	49.2	6.3	145.55	3.584	HNRNPH2	RNA	1	1
High	IsMasterProtein	Q9UGI8	Testin OS=Homo sapiens OX=9606 GN=TES PE=1 SV=1	0	14.326	7	3	9	3	48	7.68	23.12	3.561	TES	RNA	1
High	IsMasterProtein	P09651	Heterogeneous nuclear ribonucleoprotein A1 OS=Homo sapiens OX=9606 GN=HNRNPA1 PE=1 SV=5	0	63.29	28	9	55	7	38.7	9.13	107.66	3.546	HNRNPA1	RNA	1	1
High	IsMasterProtein	Q15717	ELAV-like protein 1 OS=Homo sapiens OX=9606 GN=ELAVL1 PE=1 SV=2	0	9.087	7	2	2	2	36.1	9.17	4.75	3.531	ELAVL1	RNA	1	1
High	IsMasterProtein	P13804	Electron transfer flavoprotein subunit alpha, mitochondrial OS=Homo sapiens OX=9606 GN=ETFA PE=1 SV=1	0	39.772	28	6	23	6	35.1	8.38	46.49	3.528	ETFA	FAD	1
High	IsMasterProtein	P62841	40S ribosomal protein S15 OS=Homo sapiens OX=9606 GN=RPS15 PE=1 SV=2	0	40.311	31	4	22	4	17	10.39	61.12	3.518	RPS15	RNA	1	1
High	IsMasterProtein	Q01813	ATP-dependent 6-phosphofructokinase, platelet type OS=Homo sapiens OX=9606 GN=PFKP PE=1 SV=2	0	85.82	27	16	49	14	85.5	7.55	86.94	3.517	PFKP	ATP	1
High	IsMasterProtein	Q15149	Plectin OS=Homo sapiens OX=9606 GN=PLEC PE=1 SV=3	0	70.338	5	19	39	19	531.5	5.96	72.26	3.517	PLEC	RNA	1	1
High	IsMasterProtein	P62258	14-3-3 protein epsilon OS=Homo sapiens OX=9606 GN=YWHAE PE=1 SV=1	0	38.756	35	8	40	7	29.2	4.74	67.86	3.516	YWHAE	RNA	1	1
High	IsMasterProtein	P31942	Heterogeneous nuclear ribonucleoprotein H3 OS=Homo sapiens OX=9606 GN=HNRNPH3 PE=1 SV=2	0	35.007	23	6	28	5	36.9	6.87	71.74	3.511	HNRNPH3	RNA	1	1
High	IsMasterProtein	P00338	L-lactate dehydrogenase A chain OS=Homo sapiens OX=9606 GN=LDHA PE=1 SV=2	0	140.727	42	16	213	15	36.7	8.27	507.05	3.508	LDHA	NAD	1
High	IsMasterProtein	Q16658	Fascin OS=Homo sapiens OX=9606 GN=FSCN1 PE=1 SV=3	0	54.985	24	10	42	10	54.5	7.24	71.89	3.506	FSCN1	RNA	1	1
High	IsMasterProtein	P26640	Valine--tRNA ligase OS=Homo sapiens OX=9606 GN=VARS PE=1 SV=4	0	75.668	12	12	33	12	140.4	7.59	86.37	3.505	VARS; VARS2	RNA	1	1
High	IsMasterProtein	P04792	Heat shock protein beta-1 OS=Homo sapiens OX=9606 GN=HSPB1 PE=1 SV=2	0	38.541	38	7	38	7	22.8	6.4	92.03	3.503	HSPB1	RNA	1	1
High	IsMasterProtein	P36952	Serpin B5 OS=Homo sapiens OX=9606 GN=SERPINB5 PE=1 SV=2	0	104.765	40	12	60	12	42.1	6.05	155.13	3.5	SERPINB5
High	IsMasterProtein	P28340	DNA polymerase delta catalytic subunit OS=Homo sapiens OX=9606 GN=POLD1 PE=1 SV=2	0	16.772	4	4	6	3	123.6	7.03	14.54	3.498	POLD1	DNA	1
High	IsMasterProtein	P38606	V-type proton ATPase catalytic subunit A OS=Homo sapiens OX=9606 GN=ATP6V1A PE=1 SV=2	0	14.815	8	4	13	4	68.3	5.52	18.24	3.491	ATP6V1A	ATP	1
High	IsMasterProtein	P61978	Heterogeneous nuclear ribonucleoprotein K OS=Homo sapiens OX=9606 GN=HNRNPK PE=1 SV=1	0	79.047	32	14	90	14	50.9	5.54	199.97	3.477	HNRNPK	RNA	1	1
High	IsMasterProtein	O15160	DNA-directed RNA polymerases I and III subunit RPAC1 OS=Homo sapiens OX=9606 GN=POLR1C PE=1 SV=1	0	22.47	9	2	4	2	39.2	5.5	10.22	3.472	POLR1C	DNA	1
High	IsMasterProtein	Q9Y3I0	tRNA-splicing ligase RtcB homolog OS=Homo sapiens OX=9606 GN=RTCB PE=1 SV=1	0	21.31	10	4	9	4	55.2	7.23	23.66	3.467	C22orf28; RTCB	RNA	1	1
High	IsMasterProtein	Q08211	ATP-dependent RNA helicase A OS=Homo sapiens OX=9606 GN=DHX9 PE=1 SV=4	0	175.718	23	23	126	23	140.9	6.84	317.15	3.463	DHX9	RNA	1	1
High	IsMasterProtein	P63244	Receptor of activated protein C kinase 1 OS=Homo sapiens OX=9606 GN=RACK1 PE=1 SV=3	0	91.846	46	12	77	12	35.1	7.69	190.35	3.449	GNB2L1; RACK1	RNA	1	1
High	IsMasterProtein	Q14152	Eukaryotic translation initiation factor 3 subunit A OS=Homo sapiens OX=9606 GN=EIF3A PE=1 SV=1	0	48.743	11	12	32	12	166.5	6.79	66.3	3.446	EIF3A	RNA	1	1
High	IsMasterProtein	P11766	Alcohol dehydrogenase class-3 OS=Homo sapiens OX=9606 GN=ADH5 PE=1 SV=4	0	35.243	24	7	30	7	39.7	7.49	58.84	3.44	ADH5	NAD	1
High	IsMasterProtein	Q9NSD9	Phenylalanine--tRNA ligase beta subunit OS=Homo sapiens OX=9606 GN=FARSB PE=1 SV=3	0	17.084	8	4	11	4	66.1	6.84	30.49	3.44	FARSB	RNA	1	1
High	IsMasterProtein	Q9Y285	Phenylalanine--tRNA ligase alpha subunit OS=Homo sapiens OX=9606 GN=FARSA PE=1 SV=3	0	18.97	15	5	14	5	57.5	7.8	19.49	3.42	FARSA	RNA	1	1
High	IsMasterProtein	P27708	CAD protein OS=Homo sapiens OX=9606 GN=CAD PE=1 SV=3	0	116.551	14	24	86	23	242.8	6.46	163.18	3.418	CAD	ATP	1
High	IsMasterProtein	P08195	4F2 cell-surface antigen heavy chain OS=Homo sapiens OX=9606 GN=SLC3A2 PE=1 SV=3	0	30.237	13	5	14	5	68	5.01	27.95	3.414	SLC3A2	RNA	1	1
High	IsMasterProtein	O43175	D-3-phosphoglycerate dehydrogenase OS=Homo sapiens OX=9606 GN=PHGDH PE=1 SV=4	0	82.902	35	16	78	16	56.6	6.71	172.05	3.4	PHGDH	NAD	1
High	IsMasterProtein	Q16822	Phosphoenolpyruvate carboxykinase [GTP], mitochondrial OS=Homo sapiens OX=9606 GN=PCK2 PE=1 SV=4	0	4.042	3	2	3	2	70.7	7.62	0	3.393
High	IsMasterProtein	P62906	60S ribosomal protein L10a OS=Homo sapiens OX=9606 GN=RPL10A PE=1 SV=2	0	53.039	34	8	41	8	24.8	9.94	75.35	3.385	RPL10A
High	IsMasterProtein	P48735	Isocitrate dehydrogenase [NADP], mitochondrial OS=Homo sapiens OX=9606 GN=IDH2 PE=1 SV=2	0	25.032	11	4	8	4	50.9	8.69	15.64	3.381	IDH2
High	IsMasterProtein	O43707	Alpha-actinin-4 OS=Homo sapiens OX=9606 GN=ACTN4 PE=1 SV=2	0	65.661	17	11	34	7	104.8	5.44	100.98	3.38	ACTN4
High	IsMasterProtein	P31040	Succinate dehydrogenase [ubiquinone] flavoprotein subunit, mitochondrial OS=Homo sapiens OX=9606 GN=SDHA PE=1 SV=2	0	12.909	6	3	4	3	72.6	7.39	7.98	3.377	SDHA
High	IsMasterProtein	P62333	26S proteasome regulatory subunit 10B OS=Homo sapiens OX=9606 GN=PSMC6 PE=1 SV=1	0	48.024	28	9	36	9	44.1	7.49	79.26	3.373	PSMC6
High	IsMasterProtein	Q9Y383	Putative RNA-binding protein Luc7-like 2 OS=Homo sapiens OX=9606 GN=LUC7L2 PE=1 SV=2	0	32.049	15	5	26	5	46.5	10.01	79.65	3.373	LUC7L2
High	IsMasterProtein	P23528	Cofilin-1 OS=Homo sapiens OX=9606 GN=CFL1 PE=1 SV=3	0	52.675	37	6	40	5	18.5	8.09	90.99	3.351	CFL1
High	IsMasterProtein	P14868	Aspartate--tRNA ligase, cytoplasmic OS=Homo sapiens OX=9606 GN=DARS PE=1 SV=2	0	49.503	25	10	35	10	57.1	6.55	76.08	3.344	DARS
High	IsMasterProtein	P62195	26S proteasome regulatory subunit 8 OS=Homo sapiens OX=9606 GN=PSMC5 PE=1 SV=1	0	56.233	31	10	35	8	45.6	7.55	74.73	3.334	PSMC5
High	IsMasterProtein	P68371	Tubulin beta-4B chain OS=Homo sapiens OX=9606 GN=TUBB4B PE=1 SV=1	0	154.974	42	17	323	3	49.8	4.89	767.25	3.328	TUBB4B
High	IsMasterProtein	P11586	C-1-tetrahydrofolate synthase, cytoplasmic OS=Homo sapiens OX=9606 GN=MTHFD1 PE=1 SV=3	0	101.13	24	21	66	21	101.5	7.3	151.42	3.327	MTHFD1
High	IsMasterProtein	P04406	Glyceraldehyde-3-phosphate dehydrogenase OS=Homo sapiens OX=9606 GN=GAPDH PE=1 SV=3	0	147.031	46	13	165	13	36	8.46	419.54	3.325	GAPDH
High	IsMasterProtein	O75396	Vesicle-trafficking protein SEC22b OS=Homo sapiens OX=9606 GN=SEC22B PE=1 SV=4	0	28.754	26	4	8	4	24.6	6.92	24.22	3.325	SEC22B
High	IsMasterProtein	Q9Y230	RuvB-like 2 OS=Homo sapiens OX=9606 GN=RUVBL2 PE=1 SV=3	0	62.89	29	10	35	10	51.1	5.64	74.71	3.317	RUVBL2
High	IsMasterProtein	Q9UBE0	SUMO-activating enzyme subunit 1 OS=Homo sapiens OX=9606 GN=SAE1 PE=1 SV=1	0	9.713	9	3	5	3	38.4	5.3	10.15	3.311	SAE1
High	IsMasterProtein	P26641	Elongation factor 1-gamma OS=Homo sapiens OX=9606 GN=EEF1G PE=1 SV=3	0	74.771	26	12	61	12	50.1	6.67	135.52	3.306	EEF1G
High	IsMasterProtein	Q12931	Heat shock protein 75 kDa, mitochondrial OS=Homo sapiens OX=9606 GN=TRAP1 PE=1 SV=3	0	53.491	15	8	28	7	80.1	8.21	75.09	3.303	TRAP1
High	IsMasterProtein	P07195	L-lactate dehydrogenase B chain OS=Homo sapiens OX=9606 GN=LDHB PE=1 SV=2	0	115.959	40	13	139	12	36.6	6.05	283.7	3.301	LDHB
High	IsMasterProtein	Q92973	Transportin-1 OS=Homo sapiens OX=9606 GN=TNPO1 PE=1 SV=2	0	38.931	13	6	19	6	102.3	4.98	50.36	3.294	TNPO1
High	IsMasterProtein	Q9BQA1	Methylosome protein 50 OS=Homo sapiens OX=9606 GN=WDR77 PE=1 SV=1	0	10.686	8	2	9	2	36.7	5.17	31.24	3.272	WDR77
High	IsMasterProtein	P61158	Actin-related protein 3 OS=Homo sapiens OX=9606 GN=ACTR3 PE=1 SV=3	0	29.995	22	6	15	6	47.3	5.88	41.1	3.254	ACTR3
High	IsMasterProtein	Q9Y265	RuvB-like 1 OS=Homo sapiens OX=9606 GN=RUVBL1 PE=1 SV=1	0	49.821	25	8	19	8	50.2	6.42	50.9	3.245	RUVBL1
High	IsMasterProtein	O43813	Glutathione S-transferase LANCL1 OS=Homo sapiens OX=9606 GN=LANCL1 PE=1 SV=1	0	8.398	6	2	6	2	45.3	7.75	13.68	3.245	LANCL1
High	IsMasterProtein	P33176	Kinesin-1 heavy chain OS=Homo sapiens OX=9606 GN=KIF5B PE=1 SV=1	0	46.552	11	8	17	8	109.6	6.51	35.11	3.242	KIF5B
High	IsMasterProtein	P49411	Elongation factor Tu, mitochondrial OS=Homo sapiens OX=9606 GN=TUFM PE=1 SV=2	0	103.548	42	16	74	16	49.5	7.61	180.79	3.24	TUFM
High	IsMasterProtein	O43837	Isocitrate dehydrogenase [NAD] subunit beta, mitochondrial OS=Homo sapiens OX=9606 GN=IDH3B PE=1 SV=2	0	7.657	6	2	4	2	42.2	8.46	12.65	3.239	IDH3B
High	IsMasterProtein	P06493	Cyclin-dependent kinase 1 OS=Homo sapiens OX=9606 GN=CDK1 PE=1 SV=3	0	37.442	28	7	25	6	34.1	8.4	50.07	3.227	CDK1
High	IsMasterProtein	P26358	DNA (cytosine-5)-methyltransferase 1 OS=Homo sapiens OX=9606 GN=DNMT1 PE=1 SV=2	0	4.332	1	2	2	2	183.1	7.75	0	3.217	DNMT1
High	IsMasterProtein	Q92841	Probable ATP-dependent RNA helicase DDX17 OS=Homo sapiens OX=9606 GN=DDX17 PE=1 SV=2	0	71.69	22	15	68	9	80.2	8.27	161.14	3.213	DDX17
High	IsMasterProtein	Q93008	Probable ubiquitin carboxyl-terminal hydrolase FAF-X OS=Homo sapiens OX=9606 GN=USP9X PE=1 SV=3	0	7.742	1	3	4	3	292.1	5.8	1.77	3.212	USP9X
High	IsMasterProtein	P46087	Probable 28S rRNA (cytosine(4447)-C(5))-methyltransferase OS=Homo sapiens OX=9606 GN=NOP2 PE=1 SV=2	0	8.765	4	2	3	2	89.2	9.23	4.59	3.201	NOP2
High	IsMasterProtein	P17844	Probable ATP-dependent RNA helicase DDX5 OS=Homo sapiens OX=9606 GN=DDX5 PE=1 SV=1	0	87.392	30	19	119	13	69.1	8.92	215.25	3.197	DDX5
High	IsMasterProtein	P24539	ATP synthase F(0) complex subunit B1, mitochondrial OS=Homo sapiens OX=9606 GN=ATP5PB PE=1 SV=2	0	18.968	11	2	9	2	28.9	9.36	18.92	3.196	ATP5F1
High	IsMasterProtein	O43681	ATPase ASNA1 OS=Homo sapiens OX=9606 GN=ASNA1 PE=1 SV=2	0	8.326	5	2	5	2	38.8	4.91	12.02	3.195	ASNA1
High	IsMasterProtein	O00154	Cytosolic acyl coenzyme A thioester hydrolase OS=Homo sapiens OX=9606 GN=ACOT7 PE=1 SV=3	0	18.78	13	3	14	3	41.8	8.54	27.42	3.189	ACOT7
High	IsMasterProtein	Q14103	Heterogeneous nuclear ribonucleoprotein D0 OS=Homo sapiens OX=9606 GN=HNRNPD PE=1 SV=1	0	22.449	16	5	15	4	38.4	7.81	23.21	3.187	HNRNPD
High	IsMasterProtein	Q96TA1	Protein Niban 2 OS=Homo sapiens OX=9606 GN=NIBAN2 PE=1 SV=3	0	21.358	9	4	11	4	84.1	6.19	27.65	3.166	FAM129B
High	IsMasterProtein	O96019	Actin-like protein 6A OS=Homo sapiens OX=9606 GN=ACTL6A PE=1 SV=1	0	7.19	5	2	7	2	47.4	5.6	15.06	3.158	ACTL6A
High	IsMasterProtein	O95232	Luc7-like protein 3 OS=Homo sapiens OX=9606 GN=LUC7L3 PE=1 SV=2	0	12.873	6	2	4	2	51.4	9.79	6.88	3.144	LUC7L3
High	IsMasterProtein	O75874	Isocitrate dehydrogenase [NADP] cytoplasmic OS=Homo sapiens OX=9606 GN=IDH1 PE=1 SV=2	0	28.761	18	5	10	5	46.6	7.01	26.63	3.124	IDH1
High	IsMasterProtein	P61160	Actin-related protein 2 OS=Homo sapiens OX=9606 GN=ACTR2 PE=1 SV=1	0	22.314	13	4	17	4	44.7	6.74	37.32	3.116	ACTR2
High	IsMasterProtein	P02545	Prelamin-A/C OS=Homo sapiens OX=9606 GN=LMNA PE=1 SV=1	0	83.403	22	12	31	12	74.1	7.02	68.56	3.109	LMNA
High	IsMasterProtein	O00303	Eukaryotic translation initiation factor 3 subunit F OS=Homo sapiens OX=9606 GN=EIF3F PE=1 SV=1	0	15.392	9	3	10	3	37.5	5.45	10.8	3.108	EIF3F
High	IsMasterProtein	P40939	Trifunctional enzyme subunit alpha, mitochondrial OS=Homo sapiens OX=9606 GN=HADHA PE=1 SV=2	0	38.792	11	6	13	6	82.9	9.04	31.6	3.092	HADHA
High	IsMasterProtein	O75400	Pre-mRNA-processing factor 40 homolog A OS=Homo sapiens OX=9606 GN=PRPF40A PE=1 SV=2	0	11.994	3	2	6	2	108.7	7.56	8.26	3.079	PRPF40A
High	IsMasterProtein	Q15185	Prostaglandin E synthase 3 OS=Homo sapiens OX=9606 GN=PTGES3 PE=1 SV=1	0	33.551	39	5	26	5	18.7	4.54	59.35	3.076	PTGES3
High	IsMasterProtein	O43776	Asparagine--tRNA ligase, cytoplasmic OS=Homo sapiens OX=9606 GN=NARS1 PE=1 SV=1	0	58.707	16	7	31	7	62.9	6.25	87.86	3.052	NARS
High	IsMasterProtein	Q86W42	THO complex subunit 6 homolog OS=Homo sapiens OX=9606 GN=THOC6 PE=1 SV=1	0	8.007	7	2	8	2	37.5	7.43	12.03	3.052	THOC6
High	IsMasterProtein	Q5VYK3	Proteasome adapter and scaffold protein ECM29 OS=Homo sapiens OX=9606 GN=ECPAS PE=1 SV=2	0	26.935	4	5	9	5	204.2	7.12	19.62	3.048	KIAA0368
High	IsMasterProtein	Q14683	Structural maintenance of chromosomes protein 1A OS=Homo sapiens OX=9606 GN=SMC1A PE=1 SV=2	0	47.199	12	13	22	13	143.1	7.64	38.38	3.047	SMC1A
High	IsMasterProtein	P40937	Replication factor C subunit 5 OS=Homo sapiens OX=9606 GN=RFC5 PE=1 SV=1	0	8.23	10	2	2	2	38.5	7.2	5.52	3.046	RFC5
High	IsMasterProtein	Q9H2U2	Inorganic pyrophosphatase 2, mitochondrial OS=Homo sapiens OX=9606 GN=PPA2 PE=1 SV=2	0	14.873	15	4	11	4	37.9	7.39	15.23	3.037	PPA2
High	IsMasterProtein	P62826	GTP-binding nuclear protein Ran OS=Homo sapiens OX=9606 GN=RAN PE=1 SV=3	0	37.774	25	7	67	7	24.4	7.49	154.93	3.034	RAN
High	IsMasterProtein	P60842	Eukaryotic initiation factor 4A-I OS=Homo sapiens OX=9606 GN=EIF4A1 PE=1 SV=1	0	144.818	45	19	197	16	46.1	5.48	443.83	3.025	EIF4A1
High	IsMasterProtein	Q13347	Eukaryotic translation initiation factor 3 subunit I OS=Homo sapiens OX=9606 GN=EIF3I PE=1 SV=1	0	24.298	16	5	12	5	36.5	5.64	25.62	3.013	EIF3I
High	IsMasterProtein	P27694	Replication protein A 70 kDa DNA-binding subunit OS=Homo sapiens OX=9606 GN=RPA1 PE=1 SV=2	0	34.7	16	7	19	7	68.1	7.21	36.81	2.999	RPA1
High	IsMasterProtein	P04181	Ornithine aminotransferase, mitochondrial OS=Homo sapiens OX=9606 GN=OAT PE=1 SV=1	0	18.631	10	3	8	3	48.5	7.03	8.68	2.997	OAT
High	IsMasterProtein	Q9H3N1	Thioredoxin-related transmembrane protein 1 OS=Homo sapiens OX=9606 GN=TMX1 PE=1 SV=1	0	4.603	7	2	3	2	31.8	4.98	1.88	2.994	TMX1
High	IsMasterProtein	Q15021	Condensin complex subunit 1 OS=Homo sapiens OX=9606 GN=NCAPD2 PE=1 SV=3	0	20.504	5	5	7	5	157.1	6.61	13.02	2.987	NCAPD2
High	IsMasterProtein	Q08J23	RNA cytosine C(5)-methyltransferase NSUN2 OS=Homo sapiens OX=9606 GN=NSUN2 PE=1 SV=2	0	107.258	30	18	64	18	86.4	6.77	125.07	2.981	NSUN2
High	IsMasterProtein	Q15233	Non-POU domain-containing octamer-binding protein OS=Homo sapiens OX=9606 GN=NONO PE=1 SV=4	0	36.476	21	10	45	9	54.2	8.95	79.48	2.974	NONO
High	IsMasterProtein	O75083	WD repeat-containing protein 1 OS=Homo sapiens OX=9606 GN=WDR1 PE=1 SV=4	0	17.681	8	4	8	4	66.2	6.65	12.87	2.973	WDR1
High	IsMasterProtein	Q8WX92	Negative elongation factor B OS=Homo sapiens OX=9606 GN=NELFB PE=1 SV=1	0	9.4	6	3	7	3	65.7	6.13	9.25	2.967	COBRA1; NELFB
High	IsMasterProtein	P50570	Dynamin-2 OS=Homo sapiens OX=9606 GN=DNM2 PE=1 SV=2	0	10.93	4	3	7	3	98	7.44	12.25	2.96	DNM2
High	IsMasterProtein	Q9BY44	Eukaryotic translation initiation factor 2A OS=Homo sapiens OX=9606 GN=EIF2A PE=1 SV=3	0	48.633	18	7	27	7	64.9	8.87	65.8	2.951	EIF2A
High	IsMasterProtein	P48444	Coatomer subunit delta OS=Homo sapiens OX=9606 GN=ARCN1 PE=1 SV=1	0	11.171	7	3	5	3	57.2	6.21	7.09	2.944	ARCN1
High	IsMasterProtein	P38117	Electron transfer flavoprotein subunit beta OS=Homo sapiens OX=9606 GN=ETFB PE=1 SV=3	0	29.046	26	5	11	5	27.8	8.1	28.2	2.943	ETFB
High	IsMasterProtein	P40763	Signal transducer and activator of transcription 3 OS=Homo sapiens OX=9606 GN=STAT3 PE=1 SV=2	0	20.806	8	4	6	4	88	6.3	12.5	2.94	STAT3
High	IsMasterProtein	P11310	Medium-chain specific acyl-CoA dehydrogenase, mitochondrial OS=Homo sapiens OX=9606 GN=ACADM PE=1 SV=1	0	7.998	5	2	6	2	46.6	8.37	14.37	2.933	ACADM
High	IsMasterProtein	Q92499	ATP-dependent RNA helicase DDX1 OS=Homo sapiens OX=9606 GN=DDX1 PE=1 SV=2	0	36.426	15	8	22	8	82.4	7.23	62.7	2.931	DDX1
High	IsMasterProtein	P17858	ATP-dependent 6-phosphofructokinase, liver type OS=Homo sapiens OX=9606 GN=PFKL PE=1 SV=6	0	21.056	7	4	14	2	85	7.5	23.79	2.925	PFKL
High	IsMasterProtein	P33992	DNA replication licensing factor MCM5 OS=Homo sapiens OX=9606 GN=MCM5 PE=1 SV=5	0	40.758	14	9	19	9	82.2	8.37	45.65	2.913	MCM5
High	IsMasterProtein	Q9BV20	Methylthioribose-1-phosphate isomerase OS=Homo sapiens OX=9606 GN=MRI1 PE=1 SV=1	0	13.961	12	3	6	3	39.1	6.3	17.68	2.91	MRI1
High	IsMasterProtein	P02786	Transferrin receptor protein 1 OS=Homo sapiens OX=9606 GN=TFRC PE=1 SV=2	0	38.171	13	8	19	8	84.8	6.61	41.45	2.907	TFRC
High	IsMasterProtein	Q13619	Cullin-4A OS=Homo sapiens OX=9606 GN=CUL4A PE=1 SV=3	0	10.795	4	3	15	2	87.6	8.13	9	2.907	CUL4A
High	IsMasterProtein	Q9BSJ8	Extended synaptotagmin-1 OS=Homo sapiens OX=9606 GN=ESYT1 PE=1 SV=1	0	6.406	2	2	4	2	122.8	5.83	7.07	2.907	ESYT1
High	IsMasterProtein	P61247	40S ribosomal protein S3a OS=Homo sapiens OX=9606 GN=RPS3A PE=1 SV=2	0	85.476	56	16	93	16	29.9	9.73	144.52	2.902	RPS3A
High	IsMasterProtein	Q9BRA2	Thioredoxin domain-containing protein 17 OS=Homo sapiens OX=9606 GN=TXNDC17 PE=1 SV=1	0	15.86	23	2	7	2	13.9	5.52	21.03	2.898	TXNDC17
High	IsMasterProtein	Q92900	Regulator of nonsense transcripts 1 OS=Homo sapiens OX=9606 GN=UPF1 PE=1 SV=2	0	34.282	8	7	15	7	124.3	6.61	25.68	2.876	UPF1
High	IsMasterProtein	P52788	Spermine synthase OS=Homo sapiens OX=9606 GN=SMS PE=1 SV=2	0	9.525	7	2	5	2	41.2	5.02	5.65	2.861	SMS
High	IsMasterProtein	Q9UL46	Proteasome activator complex subunit 2 OS=Homo sapiens OX=9606 GN=PSME2 PE=1 SV=4	0	14.257	11	2	9	2	27.4	5.73	17.76	2.86	PSME2
High	IsMasterProtein	Q8IXH7	Negative elongation factor C/D OS=Homo sapiens OX=9606 GN=NELFCD PE=1 SV=2	0	3.897	3	2	4	2	66.2	5.1	3.99	2.85	NELFCD; TH1L
High	IsMasterProtein	P46778	60S ribosomal protein L21 OS=Homo sapiens OX=9606 GN=RPL21 PE=1 SV=2	0	12.407	26	3	11	3	18.6	10.49	27.96	2.833	RPL21
High	IsMasterProtein	P35998	26S proteasome regulatory subunit 7 OS=Homo sapiens OX=9606 GN=PSMC2 PE=1 SV=3	0	79.437	37	13	43	13	48.6	5.95	101.23	2.832	PSMC2
High	IsMasterProtein	P49736	DNA replication licensing factor MCM2 OS=Homo sapiens OX=9606 GN=MCM2 PE=1 SV=4	0	53.034	11	8	31	8	101.8	5.52	79.47	2.832	MCM2
High	IsMasterProtein	O95336	6-phosphogluconolactonase OS=Homo sapiens OX=9606 GN=PGLS PE=1 SV=2	0	22.441	22	3	9	3	27.5	6.05	20.89	2.832	PGLS
High	IsMasterProtein	Q02790	Peptidyl-prolyl cis-trans isomerase FKBP4 OS=Homo sapiens OX=9606 GN=FKBP4 PE=1 SV=3	0	38.74	18	6	14	6	51.8	5.43	30.52	2.829	FKBP4
High	IsMasterProtein	Q96I24	Far upstream element-binding protein 3 OS=Homo sapiens OX=9606 GN=FUBP3 PE=1 SV=2	0	14.843	11	4	9	4	61.6	8.38	14.37	2.826	FUBP3
High	IsMasterProtein	P78347	General transcription factor II-I OS=Homo sapiens OX=9606 GN=GTF2I PE=1 SV=2	0	16.719	5	5	16	5	112.3	6.39	30.65	2.814	GTF2I
High	IsMasterProtein	Q14974	Importin subunit beta-1 OS=Homo sapiens OX=9606 GN=KPNB1 PE=1 SV=2	0	106.062	21	15	71	15	97.1	4.78	180.89	2.805	KPNB1
High	IsMasterProtein	P35606	Coatomer subunit beta' OS=Homo sapiens OX=9606 GN=COPB2 PE=1 SV=2	0	24.032	8	5	12	5	102.4	5.27	15.68	2.802	COPB2
High	IsMasterProtein	P42166	Lamina-associated polypeptide 2, isoform alpha OS=Homo sapiens OX=9606 GN=TMPO PE=1 SV=2	0	5.237	3	2	2	2	75.4	7.66	0	2.799	TMPO
High	IsMasterProtein	P63173	60S ribosomal protein L38 OS=Homo sapiens OX=9606 GN=RPL38 PE=1 SV=2	0	8.429	31	3	13	3	8.2	10.1	5.68	2.794	RPL38
High	IsMasterProtein	Q00839	Heterogeneous nuclear ribonucleoprotein U OS=Homo sapiens OX=9606 GN=HNRNPU PE=1 SV=6	0	114.326	19	17	131	17	90.5	6	258.09	2.788	HNRNPU
High	IsMasterProtein	P50452	Serpin B8 OS=Homo sapiens OX=9606 GN=SERPINB8 PE=1 SV=2	0	11.837	8	3	5	2	42.7	5.57	8.72	2.788	SERPINB8
High	IsMasterProtein	P51665	26S proteasome non-ATPase regulatory subunit 7 OS=Homo sapiens OX=9606 GN=PSMD7 PE=1 SV=2	0	5.424	6	2	5	2	37	6.77	8.44	2.785	PSMD7
High	IsMasterProtein	P55884	Eukaryotic translation initiation factor 3 subunit B OS=Homo sapiens OX=9606 GN=EIF3B PE=1 SV=3	0	85.963	24	17	64	17	92.4	5	117.59	2.782	EIF3B
High	IsMasterProtein	O60841	Eukaryotic translation initiation factor 5B OS=Homo sapiens OX=9606 GN=EIF5B PE=1 SV=4	0	12.352	3	3	9	3	138.7	5.49	17.92	2.781	EIF5B
High	IsMasterProtein	P06576	ATP synthase subunit beta, mitochondrial OS=Homo sapiens OX=9606 GN=ATP5F1B PE=1 SV=3	0	71.621	26	10	49	10	56.5	5.4	112.61	2.78	ATP5B
High	IsMasterProtein	P19623	Spermidine synthase OS=Homo sapiens OX=9606 GN=SRM PE=1 SV=1	0	22.352	20	4	11	4	33.8	5.49	24.5	2.78	SRM
High	IsMasterProtein	P33991	DNA replication licensing factor MCM4 OS=Homo sapiens OX=9606 GN=MCM4 PE=1 SV=5	0	31.65	9	6	13	6	96.5	6.74	17.5	2.773	MCM4
High	IsMasterProtein	P21291	Cysteine and glycine-rich protein 1 OS=Homo sapiens OX=9606 GN=CSRP1 PE=1 SV=3	0	85.508	47	6	36	6	20.6	8.57	113.2	2.767	CSRP1
High	IsMasterProtein	P24941	Cyclin-dependent kinase 2 OS=Homo sapiens OX=9606 GN=CDK2 PE=1 SV=2	0	16.995	16	4	12	3	33.9	8.68	13.78	2.746	CDK2
High	IsMasterProtein	P16615	Sarcoplasmic/endoplasmic reticulum calcium ATPase 2 OS=Homo sapiens OX=9606 GN=ATP2A2 PE=1 SV=1	0	43.784	13	11	24	11	114.7	5.34	37	2.745	ATP2A2
High	IsMasterProtein	Q9UBT2	SUMO-activating enzyme subunit 2 OS=Homo sapiens OX=9606 GN=UBA2 PE=1 SV=2	0	23.215	9	5	19	5	71.2	5.29	32.18	2.736	UBA2
High	IsMasterProtein	O15305	Phosphomannomutase 2 OS=Homo sapiens OX=9606 GN=PMM2 PE=1 SV=1	0	10.388	13	3	8	3	28.1	6.77	12.19	2.73	PMM2
High	IsMasterProtein	P12956	X-ray repair cross-complementing protein 6 OS=Homo sapiens OX=9606 GN=XRCC6 PE=1 SV=2	0	28.709	16	7	10	7	69.8	6.64	21.26	2.729	XRCC6
High	IsMasterProtein	Q9ULC4	Malignant T-cell-amplified sequence 1 OS=Homo sapiens OX=9606 GN=MCTS1 PE=1 SV=1	0	4.837	9	2	8	2	20.5	8.82	12.88	2.729	MCTS1
High	IsMasterProtein	P04843	Dolichyl-diphosphooligosaccharide--protein glycosyltransferase subunit 1 OS=Homo sapiens OX=9606 GN=RPN1 PE=1 SV=1	0	10.094	6	3	7	3	68.5	6.38	9.76	2.727	RPN1
High	IsMasterProtein	O60610	Protein diaphanous homolog 1 OS=Homo sapiens OX=9606 GN=DIAPH1 PE=1 SV=2	0	10.452	2	3	4	3	141.3	5.41	5.52	2.716	DIAPH1
High	IsMasterProtein	Q1KMD3	Heterogeneous nuclear ribonucleoprotein U-like protein 2 OS=Homo sapiens OX=9606 GN=HNRNPUL2 PE=1 SV=1	0	38.397	12	7	23	7	85.1	4.91	43.84	2.715	HNRNPUL2
High	IsMasterProtein	Q7KZF4	Staphylococcal nuclease domain-containing protein 1 OS=Homo sapiens OX=9606 GN=SND1 PE=1 SV=1	0	105.05	25	18	57	18	101.9	7.17	133.17	2.711	SND1
High	IsMasterProtein	Q14498	RNA-binding protein 39 OS=Homo sapiens OX=9606 GN=RBM39 PE=1 SV=2	0	25.59	11	4	7	4	59.3	10.1	17.68	2.71	RBM39
High	IsMasterProtein	P78527	DNA-dependent protein kinase catalytic subunit OS=Homo sapiens OX=9606 GN=PRKDC PE=1 SV=3	0	164.027	10	34	94	34	468.8	7.12	190.14	2.709	PRKDC
High	IsMasterProtein	P17812	CTP synthase 1 OS=Homo sapiens OX=9606 GN=CTPS1 PE=1 SV=2	0	33.689	13	6	28	6	66.6	6.46	69.19	2.707	CTPS1
High	IsMasterProtein	P55786	Puromycin-sensitive aminopeptidase OS=Homo sapiens OX=9606 GN=NPEPPS PE=1 SV=2	0	40.169	11	8	33	8	103.2	5.72	58.51	2.703	NPEPPS
High	IsMasterProtein	O75153	Clustered mitochondria protein homolog OS=Homo sapiens OX=9606 GN=CLUH PE=1 SV=2	0	15.967	3	4	7	4	146.6	6.13	12.86	2.699	CLUH; KIAA0664
High	IsMasterProtein	Q8N1F7	Nuclear pore complex protein Nup93 OS=Homo sapiens OX=9606 GN=NUP93 PE=1 SV=2	0	32.92	11	8	29	8	93.4	5.72	37.63	2.693	NUP93
High	IsMasterProtein	Q9Y5K5	Ubiquitin carboxyl-terminal hydrolase isozyme L5 OS=Homo sapiens OX=9606 GN=UCHL5 PE=1 SV=3	0	35.427	27	6	15	6	37.6	5.33	35.43	2.685	UCHL5
High	IsMasterProtein	Q9BVP2	Guanine nucleotide-binding protein-like 3 OS=Homo sapiens OX=9606 GN=GNL3 PE=1 SV=2	0	30.184	15	8	24	8	62	9.16	45.99	2.683	GNL3
High	IsMasterProtein	P57678	Gem-associated protein 4 OS=Homo sapiens OX=9606 GN=GEMIN4 PE=1 SV=2	0	6.751	2	2	5	2	120	6.04	13.82	2.683	GEMIN4
High	IsMasterProtein	Q9UNM6	26S proteasome non-ATPase regulatory subunit 13 OS=Homo sapiens OX=9606 GN=PSMD13 PE=1 SV=2	0	42.86	32	10	25	10	42.9	5.81	44.27	2.68	PSMD13
High	IsMasterProtein	P34897	Serine hydroxymethyltransferase, mitochondrial OS=Homo sapiens OX=9606 GN=SHMT2 PE=1 SV=3	0	43.217	24	11	46	10	56	8.53	91.75	2.674	SHMT2
High	IsMasterProtein	Q9BQE3	Tubulin alpha-1C chain OS=Homo sapiens OX=9606 GN=TUBA1C PE=1 SV=1	0	152.625	49	17	189	3	49.9	5.1	522.47	2.667	TUBA1C
High	IsMasterProtein	Q9P2J5	Leucine--tRNA ligase, cytoplasmic OS=Homo sapiens OX=9606 GN=LARS PE=1 SV=2	0	66.6	16	16	32	16	134.4	7.3	60.91	2.664	LARS
High	IsMasterProtein	O95347	Structural maintenance of chromosomes protein 2 OS=Homo sapiens OX=9606 GN=SMC2 PE=1 SV=2	0	41.929	10	10	24	10	135.6	8.43	43.68	2.66	SMC2
High	IsMasterProtein	P27824	Calnexin OS=Homo sapiens OX=9606 GN=CANX PE=1 SV=2	0	81.915	19	10	47	10	67.5	4.6	117.15	2.659	CANX
High	IsMasterProtein	P55809	Succinyl-CoA:3-ketoacid coenzyme A transferase 1, mitochondrial OS=Homo sapiens OX=9606 GN=OXCT1 PE=1 SV=1	0	15.196	7	3	7	3	56.1	7.46	12.38	2.658	OXCT1
High	IsMasterProtein	P52701	DNA mismatch repair protein Msh6 OS=Homo sapiens OX=9606 GN=MSH6 PE=1 SV=2	0	63.985	11	13	36	13	152.7	6.9	70.28	2.655	MSH6
High	IsMasterProtein	O00231	26S proteasome non-ATPase regulatory subunit 11 OS=Homo sapiens OX=9606 GN=PSMD11 PE=1 SV=3	0	49.313	25	9	31	9	47.4	6.48	52.94	2.655	PSMD11
High	IsMasterProtein	Q9BZK7	F-box-like/WD repeat-containing protein TBL1XR1 OS=Homo sapiens OX=9606 GN=TBL1XR1 PE=1 SV=1	0	6.912	5	2	3	2	55.6	5.55	0	2.653	TBL1XR1
High	IsMasterProtein	P13639	Elongation factor 2 OS=Homo sapiens OX=9606 GN=EEF2 PE=1 SV=4	0	210.567	34	30	232	29	95.3	6.83	469.98	2.634	EEF2
High	IsMasterProtein	P83731	60S ribosomal protein L24 OS=Homo sapiens OX=9606 GN=RPL24 PE=1 SV=1	0	11.006	15	2	9	2	17.8	11.25	14.33	2.625	RPL24
High	IsMasterProtein	P26447	Protein S100-A4 OS=Homo sapiens OX=9606 GN=S100A4 PE=1 SV=1	0	8.342	28	3	12	3	11.7	6.11	11.82	2.62	S100A4
High	IsMasterProtein	Q13243	Serine/arginine-rich splicing factor 5 OS=Homo sapiens OX=9606 GN=SRSF5 PE=1 SV=1	0	20.314	17	4	14	3	31.2	11.59	35.81	2.614	SRSF5
High	IsMasterProtein	P08559	Pyruvate dehydrogenase E1 component subunit alpha, somatic form, mitochondrial OS=Homo sapiens OX=9606 GN=PDHA1 PE=1 SV=3	0	23.161	13	5	24	5	43.3	8.06	57.33	2.613	PDHA1
High	IsMasterProtein	O14975	Very long-chain acyl-CoA synthetase OS=Homo sapiens OX=9606 GN=SLC27A2 PE=1 SV=2	0	10.746	4	3	8	3	70.3	8.51	13.44	2.599	SLC27A2
High	IsMasterProtein	P04844	Dolichyl-diphosphooligosaccharide--protein glycosyltransferase subunit 2 OS=Homo sapiens OX=9606 GN=RPN2 PE=1 SV=3	0	21.234	11	4	7	4	69.2	5.69	20.2	2.596	RPN2
High	IsMasterProtein	P08238	Heat shock protein HSP 90-beta OS=Homo sapiens OX=9606 GN=HSP90AB1 PE=1 SV=4	0	229.287	44	28	270	17	83.2	5.03	625.56	2.59	HSP90AB1
High	IsMasterProtein	Q8WUM4	Programmed cell death 6-interacting protein OS=Homo sapiens OX=9606 GN=PDCD6IP PE=1 SV=1	0	23.785	5	4	10	4	96	6.52	18.07	2.582	PDCD6IP
High	IsMasterProtein	P49588	Alanine--tRNA ligase, cytoplasmic OS=Homo sapiens OX=9606 GN=AARS PE=1 SV=2	0	58.761	16	12	34	12	106.7	5.53	66.06	2.581	AARS
High	IsMasterProtein	Q14204	Cytoplasmic dynein 1 heavy chain 1 OS=Homo sapiens OX=9606 GN=DYNC1H1 PE=1 SV=5	0	246.68	14	54	169	54	532.1	6.4	292.68	2.58	DYNC1H1
High	IsMasterProtein	Q15029	116 kDa U5 small nuclear ribonucleoprotein component OS=Homo sapiens OX=9606 GN=EFTUD2 PE=1 SV=1	0	98.638	23	18	65	17	109.4	5	121.34	2.579	EFTUD2
High	IsMasterProtein	Q99567	Nuclear pore complex protein Nup88 OS=Homo sapiens OX=9606 GN=NUP88 PE=1 SV=2	0	23.059	7	3	7	3	83.5	5.69	20.86	2.578	NUP88
High	IsMasterProtein	P41252	Isoleucine--tRNA ligase, cytoplasmic OS=Homo sapiens OX=9606 GN=IARS PE=1 SV=2	0	105.228	21	21	79	21	144.4	6.15	159.75	2.574	IARS
High	IsMasterProtein	P62995	Transformer-2 protein homolog beta OS=Homo sapiens OX=9606 GN=TRA2B PE=1 SV=1	0	21.987	17	4	12	4	33.6	11.25	9.25	2.572	TRA2B
High	IsMasterProtein	Q14444	Caprin-1 OS=Homo sapiens OX=9606 GN=CAPRIN1 PE=1 SV=2	0	7.502	5	3	7	3	78.3	5.25	9.83	2.571	CAPRIN1
High	IsMasterProtein	P22102	Trifunctional purine biosynthetic protein adenosine-3 OS=Homo sapiens OX=9606 GN=GART PE=1 SV=1	0	77.101	10	10	41	10	107.7	6.7	100.35	2.56	GART
High	IsMasterProtein	Q07955	Serine/arginine-rich splicing factor 1 OS=Homo sapiens OX=9606 GN=SRSF1 PE=1 SV=2	0	15.211	17	4	10	4	27.7	10.36	22.91	2.558	SRSF1
High	IsMasterProtein	O60678	Protein arginine N-methyltransferase 3 OS=Homo sapiens OX=9606 GN=PRMT3 PE=1 SV=4	0	8.73	5	2	2	2	59.9	5.35	2	2.554	PRMT3
High	IsMasterProtein	P26368	Splicing factor U2AF 65 kDa subunit OS=Homo sapiens OX=9606 GN=U2AF2 PE=1 SV=4	0	7.806	6	2	6	2	53.5	9.09	10.83	2.545	U2AF2
High	IsMasterProtein	O15371	Eukaryotic translation initiation factor 3 subunit D OS=Homo sapiens OX=9606 GN=EIF3D PE=1 SV=1	0	20.493	10	4	11	4	63.9	6.05	22.56	2.543	EIF3D
High	IsMasterProtein	P00966	Argininosuccinate synthase OS=Homo sapiens OX=9606 GN=ASS1 PE=1 SV=2	0	78.96	41	17	107	17	46.5	8.02	234.87	2.542	ASS1
High	IsMasterProtein	P46940	Ras GTPase-activating-like protein IQGAP1 OS=Homo sapiens OX=9606 GN=IQGAP1 PE=1 SV=1	0	126.665	18	23	71	23	189.1	6.48	137.9	2.54	IQGAP1
High	IsMasterProtein	Q86VP6	Cullin-associated NEDD8-dissociated protein 1 OS=Homo sapiens OX=9606 GN=CAND1 PE=1 SV=2	0	86.922	18	19	66	19	136.3	5.78	151.04	2.538	CAND1
High	IsMasterProtein	P46734	Dual specificity mitogen-activated protein kinase kinase 3 OS=Homo sapiens OX=9606 GN=MAP2K3 PE=1 SV=2	0	9.28	6	2	4	2	39.3	7.43	9.74	2.534	MAP2K3
High	IsMasterProtein	Q96QK1	Vacuolar protein sorting-associated protein 35 OS=Homo sapiens OX=9606 GN=VPS35 PE=1 SV=2	0	49.147	15	10	32	10	91.6	5.49	62.86	2.532	VPS35
High	IsMasterProtein	O75533	Splicing factor 3B subunit 1 OS=Homo sapiens OX=9606 GN=SF3B1 PE=1 SV=3	0	59.232	11	13	33	13	145.7	7.09	70.2	2.528	SF3B1
High	IsMasterProtein	P09914	Interferon-induced protein with tetratricopeptide repeats 1 OS=Homo sapiens OX=9606 GN=IFIT1 PE=1 SV=2	0	5.238	4	2	5	2	55.3	7.2	7.22	2.526	IFIT1
High	IsMasterProtein	Q99613	Eukaryotic translation initiation factor 3 subunit C OS=Homo sapiens OX=9606 GN=EIF3C PE=1 SV=1	0	38.86	11	8	17	8	105.3	5.68	45.02	2.514	EIF3C
High	IsMasterProtein	P61513	60S ribosomal protein L37a OS=Homo sapiens OX=9606 GN=RPL37A PE=1 SV=2	0	23.728	38	3	18	3	10.3	10.43	50.88	2.501	RPL37A
High	IsMasterProtein	O14950	Myosin regulatory light chain 12B OS=Homo sapiens OX=9606 GN=MYL12B PE=1 SV=2	0	47.575	51	7	33	7	19.8	4.84	72.08	2.5	MYL12B; MYL12A
High	IsMasterProtein	P43490	Nicotinamide phosphoribosyltransferase OS=Homo sapiens OX=9606 GN=NAMPT PE=1 SV=1	0	73.903	34	15	56	15	55.5	7.15	106.28	2.487	NAMPT
High	IsMasterProtein	P14324	Farnesyl pyrophosphate synthase OS=Homo sapiens OX=9606 GN=FDPS PE=1 SV=4	0	23.991	9	3	17	3	48.2	6.15	46.87	2.475	FDPS
High	IsMasterProtein	P47897	Glutamine--tRNA ligase OS=Homo sapiens OX=9606 GN=QARS PE=1 SV=1	0	56.832	17	11	35	11	87.7	7.15	84.97	2.469	QARS
High	IsMasterProtein	Q10570	Cleavage and polyadenylation specificity factor subunit 1 OS=Homo sapiens OX=9606 GN=CPSF1 PE=1 SV=2	0	11.943	2	2	2	2	160.8	6.4	4.62	2.468	CPSF1
High	IsMasterProtein	P78344	Eukaryotic translation initiation factor 4 gamma 2 OS=Homo sapiens OX=9606 GN=EIF4G2 PE=1 SV=1	0	19.123	7	6	17	6	102.3	7.14	29.73	2.452	EIF4G2
High	IsMasterProtein	P06703	Protein S100-A6 OS=Homo sapiens OX=9606 GN=S100A6 PE=1 SV=1	0	4.047	17	2	8	2	10.2	5.48	16.25	2.45	S100A6
High	IsMasterProtein	O75369	Filamin-B OS=Homo sapiens OX=9606 GN=FLNB PE=1 SV=2	0	59.203	7	16	46	13	278	5.73	79.74	2.446	FLNB
High	IsMasterProtein	Q15645	Pachytene checkpoint protein 2 homolog OS=Homo sapiens OX=9606 GN=TRIP13 PE=1 SV=2	0	8.81	6	2	7	2	48.5	6.09	12.06	2.446	TRIP13
High	IsMasterProtein	P11177	Pyruvate dehydrogenase E1 component subunit beta, mitochondrial OS=Homo sapiens OX=9606 GN=PDHB PE=1 SV=3	0	43.205	24	7	16	7	39.2	6.65	39.01	2.443	PDHB
High	IsMasterProtein	P68133	Actin, alpha skeletal muscle OS=Homo sapiens OX=9606 GN=ACTA1 PE=1 SV=1	0	94.98	30	12	259	1	42	5.39	525.71	2.441	ACTA1
High	IsMasterProtein	O60684	Importin subunit alpha-7 OS=Homo sapiens OX=9606 GN=KPNA6 PE=1 SV=1	0	17.898	6	2	4	2	60	4.98	13.38	2.44	KPNA6
High	IsMasterProtein	O60264	SWI/SNF-related matrix-associated actin-dependent regulator of chromatin subfamily A member 5 OS=Homo sapiens OX=9606 GN=SMARCA5 PE=1 SV=1	0	10.123	3	3	7	3	121.8	8.09	14.55	2.439	SMARCA5
High	IsMasterProtein	P55060	Exportin-2 OS=Homo sapiens OX=9606 GN=CSE1L PE=1 SV=3	0	94.692	18	14	87	14	110.3	5.77	176.62	2.436	CSE1L
High	IsMasterProtein	P41091	Eukaryotic translation initiation factor 2 subunit 3 OS=Homo sapiens OX=9606 GN=EIF2S3 PE=1 SV=3	0	53.794	22	8	51	8	51.1	8.4	122.1	2.432	EIF2S3
High	IsMasterProtein	Q14566	DNA replication licensing factor MCM6 OS=Homo sapiens OX=9606 GN=MCM6 PE=1 SV=1	0	54.275	17	11	37	11	92.8	5.41	94.16	2.429	MCM6
High	IsMasterProtein	P05141	ADP/ATP translocase 2 OS=Homo sapiens OX=9606 GN=SLC25A5 PE=1 SV=7	0	32.62	28	8	44	4	32.8	9.69	63.31	2.421	SLC25A5
High	IsMasterProtein	O00410	Importin-5 OS=Homo sapiens OX=9606 GN=IPO5 PE=1 SV=4	0	93.93	17	14	57	13	123.6	4.94	132.75	2.414	IPO5
High	IsMasterProtein	Q01780	Exosome component 10 OS=Homo sapiens OX=9606 GN=EXOSC10 PE=1 SV=2	0	10.887	3	2	5	2	100.8	8.46	8.54	2.412	EXOSC10
High	IsMasterProtein	P54578	Ubiquitin carboxyl-terminal hydrolase 14 OS=Homo sapiens OX=9606 GN=USP14 PE=1 SV=3	0	23.676	14	4	11	4	56	5.3	19.58	2.406	USP14
High	IsMasterProtein	P40261	Nicotinamide N-methyltransferase OS=Homo sapiens OX=9606 GN=NNMT PE=1 SV=1	0	25.79	20	5	23	5	29.6	5.74	50.22	2.399	NNMT
High	IsMasterProtein	P32969	60S ribosomal protein L9 OS=Homo sapiens OX=9606 GN=RPL9 PE=1 SV=1	0	42.39	29	4	24	4	21.9	9.95	64.47	2.397	RPL9
High	IsMasterProtein	P42704	Leucine-rich PPR motif-containing protein, mitochondrial OS=Homo sapiens OX=9606 GN=LRPPRC PE=1 SV=3	0	79.574	12	13	44	13	157.8	6.13	70.8	2.394	LRPPRC
High	IsMasterProtein	P21980	Protein-glutamine gamma-glutamyltransferase 2 OS=Homo sapiens OX=9606 GN=TGM2 PE=1 SV=2	0	48.801	18	10	39	10	77.3	5.22	89.61	2.392	TGM2
High	IsMasterProtein	P62263	40S ribosomal protein S14 OS=Homo sapiens OX=9606 GN=RPS14 PE=1 SV=3	0	37.114	30	4	32	4	16.3	10.05	97.08	2.389	RPS14
High	IsMasterProtein	O94776	Metastasis-associated protein MTA2 OS=Homo sapiens OX=9606 GN=MTA2 PE=1 SV=1	0	24.732	9	5	12	5	75	9.66	30.39	2.387	MTA2
High	IsMasterProtein	Q8NE71	ATP-binding cassette sub-family F member 1 OS=Homo sapiens OX=9606 GN=ABCF1 PE=1 SV=2	0	49.034	14	9	35	9	95.9	6.8	65.03	2.383	ABCF1
High	IsMasterProtein	Q9Y2L1	Exosome complex exonuclease RRP44 OS=Homo sapiens OX=9606 GN=DIS3 PE=1 SV=2	0	25.733	9	6	12	6	108.9	7.14	17.85	2.383	DIS3
High	IsMasterProtein	P62851	40S ribosomal protein S25 OS=Homo sapiens OX=9606 GN=RPS25 PE=1 SV=1	0	18.097	24	4	19	4	13.7	10.11	34.99	2.382	RPS25
High	IsMasterProtein	P06730	Eukaryotic translation initiation factor 4E OS=Homo sapiens OX=9606 GN=EIF4E PE=1 SV=2	0	7.956	10	2	6	2	25.1	6.15	4.21	2.38	EIF4E
High	IsMasterProtein	P31689	DnaJ homolog subfamily A member 1 OS=Homo sapiens OX=9606 GN=DNAJA1 PE=1 SV=2	0	16.583	10	3	9	3	44.8	7.08	17.7	2.372	DNAJA1
High	IsMasterProtein	O75643	U5 small nuclear ribonucleoprotein 200 kDa helicase OS=Homo sapiens OX=9606 GN=SNRNP200 PE=1 SV=2	0	106.834	13	22	56	22	244.4	6.06	104.22	2.37	SNRNP200
High	IsMasterProtein	P38919	Eukaryotic initiation factor 4A-III OS=Homo sapiens OX=9606 GN=EIF4A3 PE=1 SV=4	0	59.816	31	14	73	11	46.8	6.73	115.88	2.368	EIF4A3
High	IsMasterProtein	Q16666	Gamma-interferon-inducible protein 16 OS=Homo sapiens OX=9606 GN=IFI16 PE=1 SV=3	0	15.686	5	4	12	4	88.2	9.28	21.97	2.363	IFI16
High	IsMasterProtein	Q9BQG0	Myb-binding protein 1A OS=Homo sapiens OX=9606 GN=MYBBP1A PE=1 SV=2	0	7.64	2	2	7	2	148.8	9.28	11.54	2.36	MYBBP1A
High	IsMasterProtein	P62140	Serine/threonine-protein phosphatase PP1-beta catalytic subunit OS=Homo sapiens OX=9606 GN=PPP1CB PE=1 SV=3	0	43.137	24	6	29	1	37.2	6.19	58.22	2.331	PPP1CB
High	IsMasterProtein	P42677	40S ribosomal protein S27 OS=Homo sapiens OX=9606 GN=RPS27 PE=1 SV=3	0	18.636	39	4	21	4	9.5	9.45	27.06	2.33	RPS27
High	IsMasterProtein	Q14258	E3 ubiquitin/ISG15 ligase TRIM25 OS=Homo sapiens OX=9606 GN=TRIM25 PE=1 SV=2	0	21.159	12	7	15	7	70.9	8.09	19.49	2.327	TRIM25
High	IsMasterProtein	P61204	ADP-ribosylation factor 3 OS=Homo sapiens OX=9606 GN=ARF3 PE=1 SV=2	0	14.083	14	2	16	1	20.6	7.43	42	2.325	ARF3
High	IsMasterProtein	Q92616	eIF-2-alpha kinase activator GCN1 OS=Homo sapiens OX=9606 GN=GCN1 PE=1 SV=6	0	37.167	4	8	18	8	292.6	7.47	30.76	2.324	GCN1L1; GCN1
High	IsMasterProtein	P23526	Adenosylhomocysteinase OS=Homo sapiens OX=9606 GN=AHCY PE=1 SV=4	0	95.641	35	16	120	14	47.7	6.34	250.72	2.32	AHCY
High	IsMasterProtein	P11908	Ribose-phosphate pyrophosphokinase 2 OS=Homo sapiens OX=9606 GN=PRPS2 PE=1 SV=2	0	30.038	19	4	20	2	34.7	6.61	55.12	2.314	PRPS2
High	IsMasterProtein	P62269	40S ribosomal protein S18 OS=Homo sapiens OX=9606 GN=RPS18 PE=1 SV=3	0	37.527	34	9	40	9	17.7	10.99	83.94	2.31	RPS18
High	IsMasterProtein	P10768	S-formylglutathione hydrolase OS=Homo sapiens OX=9606 GN=ESD PE=1 SV=2	0	18.963	14	3	9	3	31.4	7.02	8.08	2.308	ESD
High	IsMasterProtein	P31930	Cytochrome b-c1 complex subunit 1, mitochondrial OS=Homo sapiens OX=9606 GN=UQCRC1 PE=1 SV=3	0	5.537	4	2	2	2	52.6	6.37	2.06	2.301	UQCRC1
High	IsMasterProtein	P43034	Platelet-activating factor acetylhydrolase IB subunit alpha OS=Homo sapiens OX=9606 GN=PAFAH1B1 PE=1 SV=2	0	42.098	24	8	28	8	46.6	7.37	62.35	2.3	PAFAH1B1
High	IsMasterProtein	Q9BZX2	Uridine-cytidine kinase 2 OS=Homo sapiens OX=9606 GN=UCK2 PE=1 SV=1	0	4.626	7	2	5	2	29.3	6.7	9.22	2.299	UCK2
High	IsMasterProtein	Q5H9R7	Serine/threonine-protein phosphatase 6 regulatory subunit 3 OS=Homo sapiens OX=9606 GN=PPP6R3 PE=1 SV=2	0	7.194	3	2	3	2	97.6	4.6	4.76	2.298	PPP6R3
High	IsMasterProtein	Q9UHD8	Septin-9 OS=Homo sapiens OX=9606 GN=SEPTIN9 PE=1 SV=2	0	16.123	5	3	20	3	65.4	8.97	26.71	2.29	2020-09-09
High	IsMasterProtein	P98179	RNA-binding protein 3 OS=Homo sapiens OX=9606 GN=RBM3 PE=1 SV=1	0	8.855	18	2	9	2	17.2	8.91	18.2	2.288	RBM3
High	IsMasterProtein	O60518	Ran-binding protein 6 OS=Homo sapiens OX=9606 GN=RANBP6 PE=1 SV=2	0	9.399	2	2	9	1	124.6	5.01	19.6	2.287	RANBP6
High	IsMasterProtein	Q13813	Spectrin alpha chain, non-erythrocytic 1 OS=Homo sapiens OX=9606 GN=SPTAN1 PE=1 SV=3	0	5.289	1	2	2	2	284.4	5.35	4.3	2.284	SPTAN1
High	IsMasterProtein	P51812	Ribosomal protein S6 kinase alpha-3 OS=Homo sapiens OX=9606 GN=RPS6KA3 PE=1 SV=1	0	9.171	5	3	8	3	83.7	6.89	18.01	2.283	RPS6KA3
High	IsMasterProtein	P30419	Glycylpeptide N-tetradecanoyltransferase 1 OS=Homo sapiens OX=9606 GN=NMT1 PE=1 SV=2	0	11.414	6	2	4	2	56.8	7.8	8.22	2.283	NMT1
High	IsMasterProtein	P30044	Peroxiredoxin-5, mitochondrial OS=Homo sapiens OX=9606 GN=PRDX5 PE=1 SV=4	0	11.482	15	2	8	2	22.1	8.7	15.57	2.28	PRDX5
High	IsMasterProtein	P43686	26S proteasome regulatory subunit 6B OS=Homo sapiens OX=9606 GN=PSMC4 PE=1 SV=2	0	31.855	21	7	19	6	47.3	5.21	35.3	2.277	PSMC4
High	IsMasterProtein	Q9H0U4	Ras-related protein Rab-1B OS=Homo sapiens OX=9606 GN=RAB1B PE=1 SV=1	0	26.825	26	4	17	2	22.2	5.73	41.2	2.272	RAB1B
High	IsMasterProtein	P06737	Glycogen phosphorylase, liver form OS=Homo sapiens OX=9606 GN=PYGL PE=1 SV=4	0	50.143	20	15	45	15	97.1	7.17	59.45	2.269	PYGL
High	IsMasterProtein	Q9H4A4	Aminopeptidase B OS=Homo sapiens OX=9606 GN=RNPEP PE=1 SV=2	0	60.142	19	10	35	10	72.5	5.74	62.14	2.269	RNPEP
High	IsMasterProtein	O14980	Exportin-1 OS=Homo sapiens OX=9606 GN=XPO1 PE=1 SV=1	0	102.395	16	13	77	13	123.3	6.06	178.07	2.268	XPO1
High	IsMasterProtein	P63010	AP-2 complex subunit beta OS=Homo sapiens OX=9606 GN=AP2B1 PE=1 SV=1	0	14.532	4	3	8	3	104.5	5.38	9.04	2.268	AP2B1
High	IsMasterProtein	Q13564	NEDD8-activating enzyme E1 regulatory subunit OS=Homo sapiens OX=9606 GN=NAE1 PE=1 SV=1	0	16.751	8	3	7	3	60.2	5.4	18.92	2.267	NAE1
High	IsMasterProtein	P15170	Eukaryotic peptide chain release factor GTP-binding subunit ERF3A OS=Homo sapiens OX=9606 GN=GSPT1 PE=1 SV=1	0	12.613	6	3	7	3	55.7	5.62	14.5	2.264	GSPT1
High	IsMasterProtein	Q16401	26S proteasome non-ATPase regulatory subunit 5 OS=Homo sapiens OX=9606 GN=PSMD5 PE=1 SV=3	0	11.907	8	3	10	3	56.2	5.48	15.94	2.263	PSMD5
High	IsMasterProtein	Q13838	Spliceosome RNA helicase DDX39B OS=Homo sapiens OX=9606 GN=DDX39B PE=1 SV=1	0	39.866	21	9	36	4	49	5.67	74.89	2.26	DDX39B
High	IsMasterProtein	P54577	Tyrosine--tRNA ligase, cytoplasmic OS=Homo sapiens OX=9606 GN=YARS PE=1 SV=4	0	35.862	21	11	29	11	59.1	7.05	39.44	2.256	YARS
High	IsMasterProtein	P23921	Ribonucleoside-diphosphate reductase large subunit OS=Homo sapiens OX=9606 GN=RRM1 PE=1 SV=1	0	55.358	18	12	48	12	90	7.15	96.85	2.254	RRM1
High	IsMasterProtein	O43143	Pre-mRNA-splicing factor ATP-dependent RNA helicase DHX15 OS=Homo sapiens OX=9606 GN=DHX15 PE=1 SV=2	0	39.898	11	7	29	7	90.9	7.46	58.8	2.252	DHX15
High	IsMasterProtein	P42224	Signal transducer and activator of transcription 1-alpha/beta OS=Homo sapiens OX=9606 GN=STAT1 PE=1 SV=2	0	12.031	5	3	5	3	87.3	6.05	6.47	2.245	STAT1
High	IsMasterProtein	Q14558	Phosphoribosyl pyrophosphate synthase-associated protein 1 OS=Homo sapiens OX=9606 GN=PRPSAP1 PE=1 SV=2	0	10.044	7	2	3	1	39.4	7.2	7.46	2.242	PRPSAP1
High	IsMasterProtein	Q8IWS0	PHD finger protein 6 OS=Homo sapiens OX=9606 GN=PHF6 PE=1 SV=1	0	5.987	11	3	3	3	41.3	8.68	2.37	2.242	PHF6
High	IsMasterProtein	Q8IZ83	Aldehyde dehydrogenase family 16 member A1 OS=Homo sapiens OX=9606 GN=ALDH16A1 PE=1 SV=2	0	12.283	5	3	6	3	85.1	6.79	11.3	2.239	ALDH16A1
High	IsMasterProtein	O00571	ATP-dependent RNA helicase DDX3X OS=Homo sapiens OX=9606 GN=DDX3X PE=1 SV=3	0	68.769	25	14	60	13	73.2	7.18	138.57	2.234	DDX3X
High	IsMasterProtein	O60502	Protein O-GlcNAcase OS=Homo sapiens OX=9606 GN=OGA PE=1 SV=2	0	14.024	5	4	13	4	102.8	4.91	13.62	2.225	MGEA5
High	IsMasterProtein	P42330	Aldo-keto reductase family 1 member C3 OS=Homo sapiens OX=9606 GN=AKR1C3 PE=1 SV=4	0	21.342	23	5	11	5	36.8	7.94	18.02	2.225	AKR1C3
High	IsMasterProtein	P27635	60S ribosomal protein L10 OS=Homo sapiens OX=9606 GN=RPL10 PE=1 SV=4	0	42.114	36	8	58	8	24.6	10.08	117.26	2.221	RPL10
High	IsMasterProtein	P34896	Serine hydroxymethyltransferase, cytosolic OS=Homo sapiens OX=9606 GN=SHMT1 PE=1 SV=1	0	29.031	16	6	9	5	53	7.71	18.78	2.218	SHMT1
High	IsMasterProtein	P61201	COP9 signalosome complex subunit 2 OS=Homo sapiens OX=9606 GN=COPS2 PE=1 SV=1	0	16.224	13	4	9	4	51.6	5.53	19.88	2.217	COPS2
High	IsMasterProtein	P54136	Arginine--tRNA ligase, cytoplasmic OS=Homo sapiens OX=9606 GN=RARS PE=1 SV=2	0	43.4	18	11	29	11	75.3	6.68	64.51	2.213	RARS
High	IsMasterProtein	P62917	60S ribosomal protein L8 OS=Homo sapiens OX=9606 GN=RPL8 PE=1 SV=2	0	20.653	11	2	24	2	28	11.03	64.73	2.21	RPL8
High	IsMasterProtein	Q13509	Tubulin beta-3 chain OS=Homo sapiens OX=9606 GN=TUBB3 PE=1 SV=2	0	125.448	36	14	176	1	50.4	4.93	432.73	2.208	TUBB3
High	IsMasterProtein	P51572	B-cell receptor-associated protein 31 OS=Homo sapiens OX=9606 GN=BCAP31 PE=1 SV=3	0	11.89	8	3	14	3	28	8.44	22.44	2.207	BCAP31
High	IsMasterProtein	P43246	DNA mismatch repair protein Msh2 OS=Homo sapiens OX=9606 GN=MSH2 PE=1 SV=1	0	38.612	12	10	34	10	104.7	5.77	59.39	2.206	MSH2
High	IsMasterProtein	Q5T4S7	E3 ubiquitin-protein ligase UBR4 OS=Homo sapiens OX=9606 GN=UBR4 PE=1 SV=1	0	7.079	0	2	5	2	573.5	6.04	2.15	2.206	UBR4
High	IsMasterProtein	P18669	Phosphoglycerate mutase 1 OS=Homo sapiens OX=9606 GN=PGAM1 PE=1 SV=2	0	17.736	16	3	6	3	28.8	7.18	10.72	2.2	PGAM1; LOC643576
High	IsMasterProtein	P46776	60S ribosomal protein L27a OS=Homo sapiens OX=9606 GN=RPL27A PE=1 SV=2	0	23.203	28	5	36	5	16.6	11	78.96	2.196	RPL27A
High	IsMasterProtein	Q9Y262	Eukaryotic translation initiation factor 3 subunit L OS=Homo sapiens OX=9606 GN=EIF3L PE=1 SV=1	0	73.696	24	13	37	13	66.7	6.34	80.3	2.191	EIF3L
High	IsMasterProtein	Q9NTJ3	Structural maintenance of chromosomes protein 4 OS=Homo sapiens OX=9606 GN=SMC4 PE=1 SV=2	0	57.074	13	13	30	13	147.1	6.79	57.13	2.189	SMC4
High	IsMasterProtein	Q13151	Heterogeneous nuclear ribonucleoprotein A0 OS=Homo sapiens OX=9606 GN=HNRNPA0 PE=1 SV=1	0	19.514	16	4	15	3	30.8	9.29	35.2	2.187	HNRNPA0
High	IsMasterProtein	Q15046	Lysine--tRNA ligase OS=Homo sapiens OX=9606 GN=KARS1 PE=1 SV=3	0	87.453	26	15	70	15	68	6.35	158.27	2.185	KARS
High	IsMasterProtein	P51571	Translocon-associated protein subunit delta OS=Homo sapiens OX=9606 GN=SSR4 PE=1 SV=1	0	5.997	12	2	2	2	19	6.15	4.49	2.17	SSR4
High	IsMasterProtein	P26639	Threonine--tRNA ligase 1, cytoplasmic OS=Homo sapiens OX=9606 GN=TARS1 PE=1 SV=3	0	143.185	38	25	131	25	83.4	6.67	274.9	2.166	TARS
High	IsMasterProtein	Q9BXJ9	N-alpha-acetyltransferase 15, NatA auxiliary subunit OS=Homo sapiens OX=9606 GN=NAA15 PE=1 SV=1	0	40.264	14	12	41	12	101.2	7.42	51.99	2.162	NAA15
High	IsMasterProtein	Q9P287	BRCA2 and CDKN1A-interacting protein OS=Homo sapiens OX=9606 GN=BCCIP PE=1 SV=1	0	3.502	7	2	5	2	36	4.61	3.59	2.159	BCCIP
High	IsMasterProtein	O60506	Heterogeneous nuclear ribonucleoprotein Q OS=Homo sapiens OX=9606 GN=SYNCRIP PE=1 SV=2	0	38.562	13	6	28	6	69.6	8.59	65.49	2.153	SYNCRIP
High	IsMasterProtein	Q9BZE4	Nucleolar GTP-binding protein 1 OS=Homo sapiens OX=9606 GN=GTPBP4 PE=1 SV=3	0	21.359	10	5	8	5	73.9	9.5	15.41	2.153	GTPBP4
High	IsMasterProtein	Q9Y266	Nuclear migration protein nudC OS=Homo sapiens OX=9606 GN=NUDC PE=1 SV=1	0	5.567	8	2	2	2	38.2	5.38	4.03	2.153	NUDC
High	IsMasterProtein	P24928	DNA-directed RNA polymerase II subunit RPB1 OS=Homo sapiens OX=9606 GN=POLR2A PE=1 SV=2	0	14.646	2	3	5	3	217	7.37	7.6	2.141	POLR2A
High	IsMasterProtein	Q2TAY7	WD40 repeat-containing protein SMU1 OS=Homo sapiens OX=9606 GN=SMU1 PE=1 SV=2	0	28.603	12	5	14	5	57.5	7.18	35.78	2.136	SMU1
High	IsMasterProtein	P46063	ATP-dependent DNA helicase Q1 OS=Homo sapiens OX=9606 GN=RECQL PE=1 SV=3	0	20.054	7	4	13	4	73.4	7.88	27.89	2.136	RECQL
High	IsMasterProtein	Q9UHI6	Probable ATP-dependent RNA helicase DDX20 OS=Homo sapiens OX=9606 GN=DDX20 PE=1 SV=2	0	4.261	3	2	4	2	92.2	6.95	1.68	2.13	DDX20
High	IsMasterProtein	Q99798	Aconitate hydratase, mitochondrial OS=Homo sapiens OX=9606 GN=ACO2 PE=1 SV=2	0	5.748	3	2	4	2	85.4	7.61	3.25	2.127	ACO2
High	IsMasterProtein	Q9H4M9	EH domain-containing protein 1 OS=Homo sapiens OX=9606 GN=EHD1 PE=1 SV=2	0	14.812	9	4	9	4	60.6	6.83	11.87	2.126	EHD1
High	IsMasterProtein	O95433	Activator of 90 kDa heat shock protein ATPase homolog 1 OS=Homo sapiens OX=9606 GN=AHSA1 PE=1 SV=1	0	12.437	9	3	10	3	38.3	5.53	18.3	2.121	AHSA1
High	IsMasterProtein	O75534	Cold shock domain-containing protein E1 OS=Homo sapiens OX=9606 GN=CSDE1 PE=1 SV=2	0	57.725	17	11	30	11	88.8	6.25	73.93	2.112	CSDE1
High	IsMasterProtein	P60228	Eukaryotic translation initiation factor 3 subunit E OS=Homo sapiens OX=9606 GN=EIF3E PE=1 SV=1	0	38.633	25	10	38	10	52.2	6.04	52.41	2.107	EIF3E
High	IsMasterProtein	Q9NUQ8	ATP-binding cassette sub-family F member 3 OS=Homo sapiens OX=9606 GN=ABCF3 PE=1 SV=2	0	22.072	7	4	7	4	79.7	6.34	20.44	2.107	ABCF3
High	IsMasterProtein	P00374	Dihydrofolate reductase OS=Homo sapiens OX=9606 GN=DHFR PE=1 SV=2	0	25.21	29	4	12	4	21.4	7.42	16.04	2.101	DHFR; DHFRP1
High	IsMasterProtein	Q9UQE7	Structural maintenance of chromosomes protein 3 OS=Homo sapiens OX=9606 GN=SMC3 PE=1 SV=2	0	94.064	19	18	46	18	141.5	7.18	101.26	2.099	SMC3
High	IsMasterProtein	P55209	Nucleosome assembly protein 1-like 1 OS=Homo sapiens OX=9606 GN=NAP1L1 PE=1 SV=1	0	19.522	9	2	7	2	45.3	4.46	19.76	2.096	NAP1L1
High	IsMasterProtein	P18583	Protein SON OS=Homo sapiens OX=9606 GN=SON PE=1 SV=4	0	6.584	2	3	11	3	263.7	5.64	16.67	2.095	SON
High	IsMasterProtein	P84098	60S ribosomal protein L19 OS=Homo sapiens OX=9606 GN=RPL19 PE=1 SV=1	0	22.968	17	3	25	3	23.5	11.47	61.17	2.092	RPL19
High	IsMasterProtein	P62899	60S ribosomal protein L31 OS=Homo sapiens OX=9606 GN=RPL31 PE=1 SV=1	0	7.473	20	3	20	3	14.5	10.54	23.95	2.092	RPL31
High	IsMasterProtein	P62913	60S ribosomal protein L11 OS=Homo sapiens OX=9606 GN=RPL11 PE=1 SV=2	0	13.61	17	3	20	3	20.2	9.6	40.01	2.087	RPL11
High	IsMasterProtein	P18621	60S ribosomal protein L17 OS=Homo sapiens OX=9606 GN=RPL17 PE=1 SV=3	0	28.031	28	5	40	5	21.4	10.17	68.83	2.081	RPL17
High	IsMasterProtein	P62888	60S ribosomal protein L30 OS=Homo sapiens OX=9606 GN=RPL30 PE=1 SV=2	0	52.34	58	6	37	6	12.8	9.63	107.64	2.078	RPL30
High	IsMasterProtein	P31946	14-3-3 protein beta/alpha OS=Homo sapiens OX=9606 GN=YWHAB PE=1 SV=3	0	42.322	41	9	41	5	28.1	4.83	79.12	2.076	YWHAB
High	IsMasterProtein	P57088	Transmembrane protein 33 OS=Homo sapiens OX=9606 GN=TMEM33 PE=1 SV=2	0	3.011	8	2	2	2	28	9.7	2.45	2.074	TMEM33
High	IsMasterProtein	Q6Y1H2	Very-long-chain (3R)-3-hydroxyacyl-CoA dehydratase 2 OS=Homo sapiens OX=9606 GN=HACD2 PE=1 SV=1	0	10.262	4	3	7	3	28.4	9.55	10.14	2.072	PTPLB; HACD2
High	IsMasterProtein	P21333	Filamin-A OS=Homo sapiens OX=9606 GN=FLNA PE=1 SV=4	0	62.985	6	13	39	10	280.6	6.06	81.39	2.067	FLNA
High	IsMasterProtein	P63241	Eukaryotic translation initiation factor 5A-1 OS=Homo sapiens OX=9606 GN=EIF5A PE=1 SV=2	0	38.972	32	8	53	8	16.8	5.24	90.19	2.055	EIF5A
High	IsMasterProtein	Q04637	Eukaryotic translation initiation factor 4 gamma 1 OS=Homo sapiens OX=9606 GN=EIF4G1 PE=1 SV=4	0	50.295	8	11	41	11	175.4	5.33	85.32	2.054	EIF4G1
High	IsMasterProtein	Q9Y696	Chloride intracellular channel protein 4 OS=Homo sapiens OX=9606 GN=CLIC4 PE=1 SV=4	0	10.155	11	2	5	2	28.8	5.59	13.82	2.049	CLIC4
High	IsMasterProtein	P53618	Coatomer subunit beta OS=Homo sapiens OX=9606 GN=COPB1 PE=1 SV=3	0	52.031	14	11	30	11	107.1	6.05	63.85	2.044	COPB1
High	IsMasterProtein	Q6P1N9	Putative deoxyribonuclease TATDN1 OS=Homo sapiens OX=9606 GN=TATDN1 PE=1 SV=2	0	6.3	7	2	5	2	33.6	6.96	9.89	2.043	TATDN1
High	IsMasterProtein	P68366	Tubulin alpha-4A chain OS=Homo sapiens OX=9606 GN=TUBA4A PE=1 SV=1	0	135.95	45	16	148	5	49.9	5.06	384.19	2.038	TUBA4A
High	IsMasterProtein	O95373	Importin-7 OS=Homo sapiens OX=9606 GN=IPO7 PE=1 SV=1	0	52.945	10	7	27	7	119.4	4.82	73.28	2.036	IPO7
High	IsMasterProtein	P45880	Voltage-dependent anion-selective channel protein 2 OS=Homo sapiens OX=9606 GN=VDAC2 PE=1 SV=2	0	18.479	13	3	6	3	31.5	7.56	14.66	2.03	VDAC2
High	IsMasterProtein	Q9Y305	Acyl-coenzyme A thioesterase 9, mitochondrial OS=Homo sapiens OX=9606 GN=ACOT9 PE=1 SV=2	0	7.518	9	3	8	3	49.9	8.6	13.81	2.023	ACOT9
High	IsMasterProtein	Q71UI9	Histone H2A.V OS=Homo sapiens OX=9606 GN=H2AFV PE=1 SV=3	0	14.383	20	3	45	1	13.5	10.58	85.24	2.017	H2AFV
High	IsMasterProtein	P09622	Dihydrolipoyl dehydrogenase, mitochondrial OS=Homo sapiens OX=9606 GN=DLD PE=1 SV=2	0	11.337	7	3	9	3	54.1	7.85	10.67	2.016	DLD
High	IsMasterProtein	P55265	Double-stranded RNA-specific adenosine deaminase OS=Homo sapiens OX=9606 GN=ADAR PE=1 SV=4	0	13.162	4	4	5	4	136	8.65	8.65	2.016	ADAR
High	IsMasterProtein	P35268	60S ribosomal protein L22 OS=Homo sapiens OX=9606 GN=RPL22 PE=1 SV=2	0	9.405	22	2	20	2	14.8	9.19	35.46	2.015	RPL22
High	IsMasterProtein	Q9UG63	ATP-binding cassette sub-family F member 2 OS=Homo sapiens OX=9606 GN=ABCF2 PE=1 SV=2	0	8.167	4	2	3	2	71.2	7.37	0	2.014	ABCF2
High	IsMasterProtein	O95163	Elongator complex protein 1 OS=Homo sapiens OX=9606 GN=ELP1 PE=1 SV=3	0	32.278	7	5	10	5	150.2	5.94	25.75	2.009	IKBKAP; ELP1
High	IsMasterProtein	P22695	Cytochrome b-c1 complex subunit 2, mitochondrial OS=Homo sapiens OX=9606 GN=UQCRC2 PE=1 SV=3	0	15.785	7	2	9	2	48.4	8.63	23.47	2.009	UQCRC2
High	IsMasterProtein	O00232	26S proteasome non-ATPase regulatory subunit 12 OS=Homo sapiens OX=9606 GN=PSMD12 PE=1 SV=3	0	57.45	26	10	42	10	52.9	7.65	81.16	2.008	PSMD12
High	IsMasterProtein	P33993	DNA replication licensing factor MCM7 OS=Homo sapiens OX=9606 GN=MCM7 PE=1 SV=4	0	26.849	13	7	20	7	81.3	6.46	35.36	2.006	MCM7
High	IsMasterProtein	O43684	Mitotic checkpoint protein BUB3 OS=Homo sapiens OX=9606 GN=BUB3 PE=1 SV=1	0	46.497	26	7	31	7	37.1	6.84	85.08	2.003	BUB3
High	IsMasterProtein	P60866	40S ribosomal protein S20 OS=Homo sapiens OX=9606 GN=RPS20 PE=1 SV=1	0	8.653	19	2	6	2	13.4	9.94	14.7	2.001	RPS20
High	IsMasterProtein	P55084	Trifunctional enzyme subunit beta, mitochondrial OS=Homo sapiens OX=9606 GN=HADHB PE=1 SV=3	0	5.475	4	2	7	2	51.3	9.41	5.31	1.997	HADHB
High	IsMasterProtein	P13010	X-ray repair cross-complementing protein 5 OS=Homo sapiens OX=9606 GN=XRCC5 PE=1 SV=3	0	14.822	10	5	8	5	82.7	5.81	8.93	1.993	XRCC5
High	IsMasterProtein	Q9UMR2	ATP-dependent RNA helicase DDX19B OS=Homo sapiens OX=9606 GN=DDX19B PE=1 SV=1	0	6.954	6	2	6	2	53.9	6.3	18.92	1.991	DDX19B
High	IsMasterProtein	Q92769	Histone deacetylase 2 OS=Homo sapiens OX=9606 GN=HDAC2 PE=1 SV=2	0	37.548	16	7	34	3	55.3	5.91	60.73	1.988	HDAC2
High	IsMasterProtein	Q9NXG2	THUMP domain-containing protein 1 OS=Homo sapiens OX=9606 GN=THUMPD1 PE=1 SV=2	0	11.006	8	2	3	2	39.3	7.88	7.2	1.981	THUMPD1
High	IsMasterProtein	Q13242	Serine/arginine-rich splicing factor 9 OS=Homo sapiens OX=9606 GN=SRSF9 PE=1 SV=1	0	3.764	10	2	4	2	25.5	8.65	6.12	1.98	SRSF9
High	IsMasterProtein	P68104	Elongation factor 1-alpha 1 OS=Homo sapiens OX=9606 GN=EEF1A1 PE=1 SV=1	0	106.551	41	14	204	14	50.1	9.01	449.34	1.976	EEF1A1
High	IsMasterProtein	Q12965	Unconventional myosin-Ie OS=Homo sapiens OX=9606 GN=MYO1E PE=1 SV=2	0	21.127	5	4	12	4	127	8.92	20.81	1.973	MYO1E
High	IsMasterProtein	P62910	60S ribosomal protein L32 OS=Homo sapiens OX=9606 GN=RPL32 PE=1 SV=2	0	22.498	23	3	21	3	15.9	11.33	52.68	1.959	RPL32
High	IsMasterProtein	Q8TCT9	Minor histocompatibility antigen H13 OS=Homo sapiens OX=9606 GN=HM13 PE=1 SV=1	0	8.019	5	2	11	2	41.5	6.43	10.6	1.956	HM13
High	IsMasterProtein	O60832	H/ACA ribonucleoprotein complex subunit DKC1 OS=Homo sapiens OX=9606 GN=DKC1 PE=1 SV=3	0	6.504	6	2	4	2	57.6	9.42	6.36	1.955	DKC1
High	IsMasterProtein	O43242	26S proteasome non-ATPase regulatory subunit 3 OS=Homo sapiens OX=9606 GN=PSMD3 PE=1 SV=2	0	56.504	25	12	44	12	60.9	8.44	91.9	1.954	PSMD3
High	IsMasterProtein	P20042	Eukaryotic translation initiation factor 2 subunit 2 OS=Homo sapiens OX=9606 GN=EIF2S2 PE=1 SV=2	0	28.546	21	7	34	7	38.4	5.8	57.96	1.952	EIF2S2
High	IsMasterProtein	P62701	40S ribosomal protein S4, X isoform OS=Homo sapiens OX=9606 GN=RPS4X PE=1 SV=2	0	58.629	39	11	92	11	29.6	10.15	176.31	1.926	RPS4X
High	IsMasterProtein	Q92878	DNA repair protein RAD50 OS=Homo sapiens OX=9606 GN=RAD50 PE=1 SV=1	0	5.648	2	2	5	2	153.8	6.89	6.46	1.925	RAD50
High	IsMasterProtein	Q14697	Neutral alpha-glucosidase AB OS=Homo sapiens OX=9606 GN=GANAB PE=1 SV=3	0	84.233	15	14	66	14	106.8	6.14	161.27	1.923	GANAB
High	IsMasterProtein	Q96AC1	Fermitin family homolog 2 OS=Homo sapiens OX=9606 GN=FERMT2 PE=1 SV=1	0	11.953	8	4	6	4	77.8	6.7	7.87	1.923	FERMT2
High	IsMasterProtein	Q01082	Spectrin beta chain, non-erythrocytic 1 OS=Homo sapiens OX=9606 GN=SPTBN1 PE=1 SV=2	0	5.986	1	2	3	2	274.4	5.57	6.67	1.92	SPTBN1
High	IsMasterProtein	P62854	40S ribosomal protein S26 OS=Homo sapiens OX=9606 GN=RPS26 PE=1 SV=3	0	15.427	27	3	34	3	13	11	79.88	1.911	RPS26; LOC101929876; RPS26P25
High	IsMasterProtein	P23381	Tryptophan--tRNA ligase, cytoplasmic OS=Homo sapiens OX=9606 GN=WARS PE=1 SV=2	0	64.179	27	11	46	11	53.1	6.23	114.29	1.899	WARS
High	IsMasterProtein	Q7L1Q6	Basic leucine zipper and W2 domain-containing protein 1 OS=Homo sapiens OX=9606 GN=BZW1 PE=1 SV=1	0	44.069	24	12	49	10	48	5.92	74.11	1.896	BZW1
High	IsMasterProtein	P62277	40S ribosomal protein S13 OS=Homo sapiens OX=9606 GN=RPS13 PE=1 SV=2	0	14.419	25	4	20	4	17.2	10.54	34.62	1.892	RPS13
High	IsMasterProtein	P62750	60S ribosomal protein L23a OS=Homo sapiens OX=9606 GN=RPL23A PE=1 SV=1	0	31.738	33	6	40	6	17.7	10.45	88.23	1.878	RPL23A
High	IsMasterProtein	Q9Y5L0	Transportin-3 OS=Homo sapiens OX=9606 GN=TNPO3 PE=1 SV=3	0	9.478	4	3	7	3	104.1	5.57	3.87	1.868	TNPO3
High	IsMasterProtein	P62753	40S ribosomal protein S6 OS=Homo sapiens OX=9606 GN=RPS6 PE=1 SV=1	0	31.732	23	5	41	5	28.7	10.84	106.26	1.865	RPS6
High	IsMasterProtein	O75439	Mitochondrial-processing peptidase subunit beta OS=Homo sapiens OX=9606 GN=PMPCB PE=1 SV=2	0	18.793	8	3	8	3	54.3	6.83	20.25	1.863	PMPCB
High	IsMasterProtein	Q96DG6	Carboxymethylenebutenolidase homolog OS=Homo sapiens OX=9606 GN=CMBL PE=1 SV=1	0	19.694	13	4	13	4	28	7.18	20.32	1.857	CMBL
High	IsMasterProtein	P08243	Asparagine synthetase [glutamine-hydrolyzing] OS=Homo sapiens OX=9606 GN=ASNS PE=1 SV=4	0	23.243	14	6	18	6	64.3	6.86	16.75	1.856	ASNS
High	IsMasterProtein	P22314	Ubiquitin-like modifier-activating enzyme 1 OS=Homo sapiens OX=9606 GN=UBA1 PE=1 SV=3	0	103.171	20	16	53	16	117.8	5.76	127.08	1.851	UBA1
High	IsMasterProtein	P42285	Exosome RNA helicase MTR4 OS=Homo sapiens OX=9606 GN=MTREX PE=1 SV=3	0	18.032	5	4	10	4	117.7	6.52	14.75	1.845	SKIV2L2
High	IsMasterProtein	P62249	40S ribosomal protein S16 OS=Homo sapiens OX=9606 GN=RPS16 PE=1 SV=2	0	31.549	54	9	64	9	16.4	10.21	114.56	1.844	RPS16
High	IsMasterProtein	P17655	Calpain-2 catalytic subunit OS=Homo sapiens OX=9606 GN=CAPN2 PE=1 SV=6	0	12.832	6	3	7	3	79.9	4.98	8.02	1.837	CAPN2
High	IsMasterProtein	Q01130	Serine/arginine-rich splicing factor 2 OS=Homo sapiens OX=9606 GN=SRSF2 PE=1 SV=4	0	31.177	19	4	41	4	25.5	11.85	114.02	1.836	SRSF2
High	IsMasterProtein	P43243	Matrin-3 OS=Homo sapiens OX=9606 GN=MATR3 PE=1 SV=2	0	39.037	14	10	40	10	94.6	6.25	54.74	1.836	MATR3
High	IsMasterProtein	P56192	Methionine--tRNA ligase, cytoplasmic OS=Homo sapiens OX=9606 GN=MARS PE=1 SV=2	0	42.167	10	7	25	7	101.1	6.16	54.79	1.836	MARS
High	IsMasterProtein	P39023	60S ribosomal protein L3 OS=Homo sapiens OX=9606 GN=RPL3 PE=1 SV=2	0	119.967	30	13	87	13	46.1	10.18	176.35	1.834	RPL3
High	IsMasterProtein	Q16629	Serine/arginine-rich splicing factor 7 OS=Homo sapiens OX=9606 GN=SRSF7 PE=1 SV=1	0	36.917	29	7	38	6	27.4	11.82	91.82	1.821	SRSF7
High	IsMasterProtein	O43592	Exportin-T OS=Homo sapiens OX=9606 GN=XPOT PE=1 SV=2	0	13.251	3	2	9	2	109.9	5.39	20.25	1.82	XPOT
High	IsMasterProtein	Q02543	60S ribosomal protein L18a OS=Homo sapiens OX=9606 GN=RPL18A PE=1 SV=2	0	32.974	35	6	51	6	20.7	10.71	133.12	1.81	RPL18A
High	IsMasterProtein	P15880	40S ribosomal protein S2 OS=Homo sapiens OX=9606 GN=RPS2 PE=1 SV=2	0	58.609	32	9	107	9	31.3	10.24	199.7	1.806	RPS2
High	IsMasterProtein	Q6ZNA1	Zinc finger protein 836 OS=Homo sapiens OX=9606 GN=ZNF836 PE=2 SV=2	0	8.274	2	2	2	2	107.6	9.22	5.28	1.805	ZNF836
High	IsMasterProtein	P16989	Y-box-binding protein 3 OS=Homo sapiens OX=9606 GN=YBX3 PE=1 SV=4	0	29.449	15	5	36	1	40.1	9.77	100.88	1.804	CSDA; YBX3
High	IsMasterProtein	P53621	Coatomer subunit alpha OS=Homo sapiens OX=9606 GN=COPA PE=1 SV=2	0	35.897	8	8	23	8	138.3	7.66	43.59	1.792	COPA
High	IsMasterProtein	O94906	Pre-mRNA-processing factor 6 OS=Homo sapiens OX=9606 GN=PRPF6 PE=1 SV=1	0	19.435	5	4	7	4	106.9	8.25	17.68	1.768	PRPF6
High	IsMasterProtein	Q99873	Protein arginine N-methyltransferase 1 OS=Homo sapiens OX=9606 GN=PRMT1 PE=1 SV=3	0	83.81	37	12	85	12	42.4	5.35	208.15	1.767
High	IsMasterProtein	P23396	40S ribosomal protein S3 OS=Homo sapiens OX=9606 GN=RPS3 PE=1 SV=2	0	77.374	67	14	108	14	26.7	9.66	232.7	1.766	RPS3
High	IsMasterProtein	P53992	Protein transport protein Sec24C OS=Homo sapiens OX=9606 GN=SEC24C PE=1 SV=3	0	17.109	4	3	10	3	118.2	7.06	24.98	1.746	SEC24C
High	IsMasterProtein	P41250	Glycine--tRNA ligase OS=Homo sapiens OX=9606 GN=GARS1 PE=1 SV=3	0	14.651	7	4	15	4	83.1	7.03	29.43	1.739	GARS
High	IsMasterProtein	Q9Y4L1	Hypoxia up-regulated protein 1 OS=Homo sapiens OX=9606 GN=HYOU1 PE=1 SV=1	0	22.299	7	6	24	6	111.3	5.22	16.62	1.738	HYOU1
High	IsMasterProtein	P46782	40S ribosomal protein S5 OS=Homo sapiens OX=9606 GN=RPS5 PE=1 SV=4	0	35.684	22	7	51	7	22.9	9.72	97.27	1.718	RPS5
High	IsMasterProtein	P62241	40S ribosomal protein S8 OS=Homo sapiens OX=9606 GN=RPS8 PE=1 SV=2	0	86.557	52	11	118	11	24.2	10.32	293.91	1.716	RPS8
High	IsMasterProtein	Q96FW1	Ubiquitin thioesterase OTUB1 OS=Homo sapiens OX=9606 GN=OTUB1 PE=1 SV=2	0	17.641	14	3	13	3	31.3	4.94	25.34	1.7	OTUB1
High	IsMasterProtein	Q6P2Q9	Pre-mRNA-processing-splicing factor 8 OS=Homo sapiens OX=9606 GN=PRPF8 PE=1 SV=2	0	108.816	13	21	58	21	273.4	8.84	106.76	1.698	PRPF8
High	IsMasterProtein	P35249	Replication factor C subunit 4 OS=Homo sapiens OX=9606 GN=RFC4 PE=1 SV=2	0	9.213	8	2	4	2	39.7	8.02	8.4	1.692	RFC4
High	IsMasterProtein	P35613	Basigin OS=Homo sapiens OX=9606 GN=BSG PE=1 SV=2	0	19.865	11	3	12	3	42.2	5.66	31.14	1.688	BSG
High	IsMasterProtein	Q9Y281	Cofilin-2 OS=Homo sapiens OX=9606 GN=CFL2 PE=1 SV=1	0	13.43	23	3	11	2	18.7	7.88	22.6	1.688	CFL2
High	IsMasterProtein	P61026	Ras-related protein Rab-10 OS=Homo sapiens OX=9606 GN=RAB10 PE=1 SV=1	0	14.474	17	3	10	1	22.5	8.38	22.78	1.678	RAB10
High	IsMasterProtein	P21796	Voltage-dependent anion-selective channel protein 1 OS=Homo sapiens OX=9606 GN=VDAC1 PE=1 SV=2	0	13.17	12	3	7	3	30.8	8.54	18.25	1.678	VDAC1
High	IsMasterProtein	P36542	ATP synthase subunit gamma, mitochondrial OS=Homo sapiens OX=9606 GN=ATP5F1C PE=1 SV=1	0	7.595	7	2	4	2	33	9.22	9.48	1.669	ATP5C1
High	IsMasterProtein	Q16181	Septin-7 OS=Homo sapiens OX=9606 GN=SEPTIN7 PE=1 SV=2	0	18.792	12	4	10	4	50.6	8.63	20.42	1.666	2020-09-07
High	IsMasterProtein	P25205	DNA replication licensing factor MCM3 OS=Homo sapiens OX=9606 GN=MCM3 PE=1 SV=3	0	77.67	20	13	51	13	90.9	5.77	107.93	1.659	MCM3
High	IsMasterProtein	Q9Y3A5	Ribosome maturation protein SBDS OS=Homo sapiens OX=9606 GN=SBDS PE=1 SV=4	0	3.822	8	2	6	2	28.7	8.75	7.06	1.658	SBDS
High	IsMasterProtein	P07355	Annexin A2 OS=Homo sapiens OX=9606 GN=ANXA2 PE=1 SV=2	0	27.574	12	4	13	4	38.6	7.75	36.06	1.652	ANXA2
High	IsMasterProtein	O75390	Citrate synthase, mitochondrial OS=Homo sapiens OX=9606 GN=CS PE=1 SV=2	0	26.047	10	4	22	4	51.7	8.32	49.42	1.648	CS
High	IsMasterProtein	Q96RP9	Elongation factor G, mitochondrial OS=Homo sapiens OX=9606 GN=GFM1 PE=1 SV=2	0	5.503	5	3	4	3	83.4	7.01	5.89	1.646	GFM1
High	IsMasterProtein	P26373	60S ribosomal protein L13 OS=Homo sapiens OX=9606 GN=RPL13 PE=1 SV=4	0	15.92	19	4	30	4	24.2	11.65	56.62	1.637	RPL13
High	IsMasterProtein	P60900	Proteasome subunit alpha type-6 OS=Homo sapiens OX=9606 GN=PSMA6 PE=1 SV=1	0	8.527	9	2	12	2	27.4	6.76	14.69	1.635	PSMA6
High	IsMasterProtein	Q05048	Cleavage stimulation factor subunit 1 OS=Homo sapiens OX=9606 GN=CSTF1 PE=1 SV=1	0	8.196	6	2	3	2	48.3	6.58	3.48	1.635	CSTF1
High	IsMasterProtein	P13535	Myosin-8 OS=Homo sapiens OX=9606 GN=MYH8 PE=1 SV=3	0	5.452	1	2	17	1	222.6	5.74	30.98	1.632	MYH8
High	IsMasterProtein	P62280	40S ribosomal protein S11 OS=Homo sapiens OX=9606 GN=RPS11 PE=1 SV=3	0	46.041	39	7	65	7	18.4	10.3	109.56	1.627	RPS11
High	IsMasterProtein	P0DMN0	Sulfotransferase 1A4 OS=Homo sapiens OX=9606 GN=SULT1A4 PE=1 SV=1	0	12.72	11	2	3	2	34.2	6.01	8.52	1.625	SULT1A4; LOC101929857; LOC101060714; SULT1A3; SLX1A-SULT1A3; LOC105369243
High	IsMasterProtein	P11413	Glucose-6-phosphate 1-dehydrogenase OS=Homo sapiens OX=9606 GN=G6PD PE=1 SV=4	0	38.328	16	7	22	7	59.2	6.84	49.66	1.622	G6PD
High	IsMasterProtein	Q15393	Splicing factor 3B subunit 3 OS=Homo sapiens OX=9606 GN=SF3B3 PE=1 SV=4	0	71.842	14	14	43	14	135.5	5.26	79.35	1.62	SF3B3
High	IsMasterProtein	P50454	Serpin H1 OS=Homo sapiens OX=9606 GN=SERPINH1 PE=1 SV=2	0	24.298	12	4	14	4	46.4	8.69	27.66	1.617	SERPINH1
High	IsMasterProtein	Q9NR30	Nucleolar RNA helicase 2 OS=Homo sapiens OX=9606 GN=DDX21 PE=1 SV=5	0	46.142	13	9	46	9	87.3	9.28	102.76	1.615	DDX21
High	IsMasterProtein	P49748	Very long-chain specific acyl-CoA dehydrogenase, mitochondrial OS=Homo sapiens OX=9606 GN=ACADVL PE=1 SV=1	0	4.273	4	2	2	2	70.3	8.75	1.88	1.613	ACADVL
High	IsMasterProtein	P46783	40S ribosomal protein S10 OS=Homo sapiens OX=9606 GN=RPS10 PE=1 SV=1	0	19.56	25	4	19	4	18.9	10.15	40.32	1.603	RPS10
High	IsMasterProtein	Q99460	26S proteasome non-ATPase regulatory subunit 1 OS=Homo sapiens OX=9606 GN=PSMD1 PE=1 SV=2	0	28.5	7	5	20	5	105.8	5.39	37.14	1.59	PSMD1
High	IsMasterProtein	Q13085	Acetyl-CoA carboxylase 1 OS=Homo sapiens OX=9606 GN=ACACA PE=1 SV=2	0	22.065	3	5	12	5	265.4	6.37	19.92	1.59	ACACA
High	IsMasterProtein	P46779	60S ribosomal protein L28 OS=Homo sapiens OX=9606 GN=RPL28 PE=1 SV=3	0	19.671	28	5	37	5	15.7	12.02	71.75	1.584	RPL28
High	IsMasterProtein	P39019	40S ribosomal protein S19 OS=Homo sapiens OX=9606 GN=RPS19 PE=1 SV=2	0	8.765	21	3	4	3	16.1	10.32	5.64	1.583	RPS19
High	IsMasterProtein	P62847	40S ribosomal protein S24 OS=Homo sapiens OX=9606 GN=RPS24 PE=1 SV=1	0	18.959	20	3	24	3	15.4	10.78	50.71	1.578	RPS24
High	IsMasterProtein	P20674	Cytochrome c oxidase subunit 5A, mitochondrial OS=Homo sapiens OX=9606 GN=COX5A PE=1 SV=2	0	6.959	16	2	6	2	16.8	6.79	15.12	1.577	COX5A
High	IsMasterProtein	P67809	Y-box-binding protein 1 OS=Homo sapiens OX=9606 GN=YBX1 PE=1 SV=3	0	103.774	54	13	101	9	35.9	9.88	274.83	1.571	YBX1
High	IsMasterProtein	P08708	40S ribosomal protein S17 OS=Homo sapiens OX=9606 GN=RPS17 PE=1 SV=2	0	30.849	33	5	25	5	15.5	9.85	40.5	1.571	RPS17; RPS17L
High	IsMasterProtein	P36873	Serine/threonine-protein phosphatase PP1-gamma catalytic subunit OS=Homo sapiens OX=9606 GN=PPP1CC PE=1 SV=1	0	42.972	24	6	28	1	37	6.54	52.12	1.569	PPP1CC
High	IsMasterProtein	P45974	Ubiquitin carboxyl-terminal hydrolase 5 OS=Homo sapiens OX=9606 GN=USP5 PE=1 SV=2	0	26.999	7	5	16	5	95.7	5.03	23.36	1.568	USP5
High	IsMasterProtein	Q09666	Neuroblast differentiation-associated protein AHNAK OS=Homo sapiens OX=9606 GN=AHNAK PE=1 SV=2	0	20.087	1	3	10	3	628.7	6.15	22.74	1.547	AHNAK
High	IsMasterProtein	P36578	60S ribosomal protein L4 OS=Homo sapiens OX=9606 GN=RPL4 PE=1 SV=5	0	102.878	27	13	139	13	47.7	11.06	337.81	1.545	RPL4
High	IsMasterProtein	O14776	Transcription elongation regulator 1 OS=Homo sapiens OX=9606 GN=TCERG1 PE=1 SV=2	0	3.197	1	2	2	2	123.8	8.65	0	1.545	TCERG1
High	IsMasterProtein	P25705	ATP synthase subunit alpha, mitochondrial OS=Homo sapiens OX=9606 GN=ATP5F1A PE=1 SV=1	0	69.621	27	14	91	14	59.7	9.13	136.57	1.544	ATP5A1
High	IsMasterProtein	P13693	Translationally-controlled tumor protein OS=Homo sapiens OX=9606 GN=TPT1 PE=1 SV=1	0	5.908	6	2	9	2	19.6	4.93	14.87	1.544	TPT1
High	IsMasterProtein	Q5QNW6	Histone H2B type 2-F OS=Homo sapiens OX=9606 GN=HIST2H2BF PE=1 SV=3	0	48.898	41	6	123	2	13.9	10.32	204.22	1.538	HIST2H2BF
High	IsMasterProtein	P55072	Transitional endoplasmic reticulum ATPase OS=Homo sapiens OX=9606 GN=VCP PE=1 SV=4	0	44.518	16	10	35	10	89.3	5.26	57.27	1.537	VCP
High	IsMasterProtein	P68400	Casein kinase II subunit alpha OS=Homo sapiens OX=9606 GN=CSNK2A1 PE=1 SV=1	0	8.929	6	2	4	2	45.1	7.74	5.48	1.535	CSNK2A1
High	IsMasterProtein	Q16555	Dihydropyrimidinase-related protein 2 OS=Homo sapiens OX=9606 GN=DPYSL2 PE=1 SV=1	0	17.547	6	3	9	3	62.3	6.38	15.71	1.529	DPYSL2
High	IsMasterProtein	P09960	Leukotriene A-4 hydrolase OS=Homo sapiens OX=9606 GN=LTA4H PE=1 SV=2	0	27.49	9	4	14	4	69.2	6.18	25.54	1.527	LTA4H
High	IsMasterProtein	Q9UKM9	RNA-binding protein Raly OS=Homo sapiens OX=9606 GN=RALY PE=1 SV=1	0	18.117	18	6	15	6	32.4	9.17	28.63	1.523	RALY
High	IsMasterProtein	Q9NS86	LanC-like protein 2 OS=Homo sapiens OX=9606 GN=LANCL2 PE=1 SV=1	0	22.024	12	4	10	4	50.8	7.43	14.54	1.518	LANCL2
High	IsMasterProtein	Q15019	Septin-2 OS=Homo sapiens OX=9606 GN=SEPTIN2 PE=1 SV=1	0	34.429	20	6	23	6	41.5	6.6	55.94	1.513	2020-09-02
High	IsMasterProtein	Q8WUM0	Nuclear pore complex protein Nup133 OS=Homo sapiens OX=9606 GN=NUP133 PE=1 SV=2	0	4.157	2	2	4	2	128.9	5.1	6.88	1.485	NUP133
High	IsMasterProtein	P18077	60S ribosomal protein L35a OS=Homo sapiens OX=9606 GN=RPL35A PE=1 SV=2	0	15.369	32	4	33	4	12.5	11.06	59.86	1.481	RPL35A
High	IsMasterProtein	Q969Q0	60S ribosomal protein L36a-like OS=Homo sapiens OX=9606 GN=RPL36AL PE=1 SV=3	0	10.578	17	3	15	3	12.5	10.65	27.97	1.466	RPL36AL
High	IsMasterProtein	P52209	6-phosphogluconate dehydrogenase, decarboxylating OS=Homo sapiens OX=9606 GN=PGD PE=1 SV=3	0	39.145	23	9	24	9	53.1	7.23	36.5	1.464	PGD
High	IsMasterProtein	O15067	Phosphoribosylformylglycinamidine synthase OS=Homo sapiens OX=9606 GN=PFAS PE=1 SV=4	0	19.029	3	3	9	3	144.6	5.76	30.15	1.463	PFAS
High	IsMasterProtein	O00264	Membrane-associated progesterone receptor component 1 OS=Homo sapiens OX=9606 GN=PGRMC1 PE=1 SV=3	0	7.16	12	2	5	2	21.7	4.7	6.04	1.461	PGRMC1
High	IsMasterProtein	Q7L2H7	Eukaryotic translation initiation factor 3 subunit M OS=Homo sapiens OX=9606 GN=EIF3M PE=1 SV=1	0	22.424	10	4	11	4	42.5	5.63	13.51	1.454	EIF3M
High	IsMasterProtein	O14744	Protein arginine N-methyltransferase 5 OS=Homo sapiens OX=9606 GN=PRMT5 PE=1 SV=4	0	26.679	13	6	27	6	72.6	6.29	50.73	1.453	PRMT5
High	IsMasterProtein	P05388	60S acidic ribosomal protein P0 OS=Homo sapiens OX=9606 GN=RPLP0 PE=1 SV=1	0	31.545	16	4	28	4	34.3	5.97	62.76	1.438	RPLP0
High	IsMasterProtein	P30613	Pyruvate kinase PKLR OS=Homo sapiens OX=9606 GN=PKLR PE=1 SV=2	0	10.566	3	3	29	2	61.8	7.74	61.1	1.431	PKLR
High	IsMasterProtein	P07203	Glutathione peroxidase 1 OS=Homo sapiens OX=9606 GN=GPX1 PE=1 SV=4	0	12.256	14	2	6	2	22.1	6.55	12.1	1.43	GPX1
High	IsMasterProtein	P61981	14-3-3 protein gamma OS=Homo sapiens OX=9606 GN=YWHAG PE=1 SV=2	0	33.434	27	6	40	3	28.3	4.89	79.01	1.419	YWHAG
High	IsMasterProtein	P62314	Small nuclear ribonucleoprotein Sm D1 OS=Homo sapiens OX=9606 GN=SNRPD1 PE=1 SV=1	0	9.051	20	3	10	3	13.3	11.56	23.53	1.411	SNRPD1
High	IsMasterProtein	Q9UHB9	Signal recognition particle subunit SRP68 OS=Homo sapiens OX=9606 GN=SRP68 PE=1 SV=2	0	15.198	7	4	9	4	70.7	8.56	14.13	1.401	SRP68
High	IsMasterProtein	P31939	Bifunctional purine biosynthesis protein PURH OS=Homo sapiens OX=9606 GN=ATIC PE=1 SV=3	0	40.45	18	8	40	8	64.6	6.71	64.84	1.398	ATIC
High	IsMasterProtein	Q8N163	Cell cycle and apoptosis regulator protein 2 OS=Homo sapiens OX=9606 GN=CCAR2 PE=1 SV=2	0	15.867	5	3	6	3	102.8	5.22	11.7	1.381	CCAR2; KIAA1967
High	IsMasterProtein	Q9UKN7	Unconventional myosin-XV OS=Homo sapiens OX=9606 GN=MYO15A PE=1 SV=2	0	3.085	0	2	9	2	395	9.17	3.45	1.378	MYO15A
High	IsMasterProtein	Q9NR45	Sialic acid synthase OS=Homo sapiens OX=9606 GN=NANS PE=1 SV=2	0	14.181	12	3	20	3	40.3	6.74	31.03	1.372	NANS
High	IsMasterProtein	P31153	S-adenosylmethionine synthase isoform type-2 OS=Homo sapiens OX=9606 GN=MAT2A PE=1 SV=1	0	20.955	16	6	20	6	43.6	6.48	24.67	1.367	MAT2A
High	IsMasterProtein	Q06210	Glutamine--fructose-6-phosphate aminotransferase [isomerizing] 1 OS=Homo sapiens OX=9606 GN=GFPT1 PE=1 SV=3	0	27.168	11	6	11	6	78.8	7.11	19.38	1.363	GFPT1
High	IsMasterProtein	P18085	ADP-ribosylation factor 4 OS=Homo sapiens OX=9606 GN=ARF4 PE=1 SV=3	0	17.593	20	3	26	2	20.5	7.14	53.31	1.36	ARF4
High	IsMasterProtein	Q9Y5P6	Mannose-1-phosphate guanyltransferase beta OS=Homo sapiens OX=9606 GN=GMPPB PE=1 SV=2	0	3.08	6	2	3	2	39.8	6.61	4.47	1.36	GMPPB
High	IsMasterProtein	Q7Z6Z7	E3 ubiquitin-protein ligase HUWE1 OS=Homo sapiens OX=9606 GN=HUWE1 PE=1 SV=3	0	22.046	2	7	14	7	481.6	5.22	17.03	1.331	HUWE1
High	IsMasterProtein	P01889	HLA class I histocompatibility antigen, B alpha chain OS=Homo sapiens OX=9606 GN=HLA-B PE=1 SV=3	0	27.35	17	4	12	3	40.4	5.85	32.78	1.327	HLA-B
High	IsMasterProtein	Q16531	DNA damage-binding protein 1 OS=Homo sapiens OX=9606 GN=DDB1 PE=1 SV=1	0	4.825	2	2	3	2	126.9	5.26	0	1.323	DDB1
High	IsMasterProtein	P06132	Uroporphyrinogen decarboxylase OS=Homo sapiens OX=9606 GN=UROD PE=1 SV=2	0	11.626	8	2	5	2	40.8	6.14	9.3	1.317	UROD
High	IsMasterProtein	Q07020	60S ribosomal protein L18 OS=Homo sapiens OX=9606 GN=RPL18 PE=1 SV=2	0	49.235	42	7	70	7	21.6	11.72	191.07	1.316	RPL18
High	IsMasterProtein	P49458	Signal recognition particle 9 kDa protein OS=Homo sapiens OX=9606 GN=SRP9 PE=1 SV=2	0	11.617	23	2	10	2	10.1	7.97	23	1.306	SRP9; SRP9P1
High	IsMasterProtein	P61313	60S ribosomal protein L15 OS=Homo sapiens OX=9606 GN=RPL15 PE=1 SV=2	0	58.359	45	10	61	10	24.1	11.62	151.17	1.297	RPL15
High	IsMasterProtein	Q9Y3U8	60S ribosomal protein L36 OS=Homo sapiens OX=9606 GN=RPL36 PE=1 SV=3	0	5.449	20	2	7	2	12.2	11.59	14.72	1.297	RPL36
High	IsMasterProtein	P40429	60S ribosomal protein L13a OS=Homo sapiens OX=9606 GN=RPL13A PE=1 SV=2	0	22.263	23	6	79	6	23.6	10.93	135.88	1.282	RPL13A
High	IsMasterProtein	P50914	60S ribosomal protein L14 OS=Homo sapiens OX=9606 GN=RPL14 PE=1 SV=4	0	31.254	25	5	49	5	23.4	10.93	119.49	1.263	RPL14
High	IsMasterProtein	P81605	Dermcidin OS=Homo sapiens OX=9606 GN=DCD PE=1 SV=2	0	10.198	20	2	9	2	11.3	6.54	19.19	1.249	DCD
High	IsMasterProtein	P49591	Serine--tRNA ligase, cytoplasmic OS=Homo sapiens OX=9606 GN=SARS PE=1 SV=3	0	11.071	5	2	2	2	58.7	6.43	5.46	1.246	SARS
High	IsMasterProtein	P25786	Proteasome subunit alpha type-1 OS=Homo sapiens OX=9606 GN=PSMA1 PE=1 SV=1	0	15.851	18	3	9	3	29.5	6.61	14.54	1.231	PSMA1
High	IsMasterProtein	Q12769	Nuclear pore complex protein Nup160 OS=Homo sapiens OX=9606 GN=NUP160 PE=1 SV=3	0	4.834	1	2	2	2	162	5.5	0	1.231	NUP160
High	IsMasterProtein	Q6UB35	Monofunctional C1-tetrahydrofolate synthase, mitochondrial OS=Homo sapiens OX=9606 GN=MTHFD1L PE=1 SV=1	0	7.045	2	2	6	2	105.7	8.06	12.01	1.23	MTHFD1L
High	IsMasterProtein	P21266	Glutathione S-transferase Mu 3 OS=Homo sapiens OX=9606 GN=GSTM3 PE=1 SV=3	0	8.492	12	2	6	2	26.5	5.54	6.57	1.226	GSTM3
High	IsMasterProtein	P62244	40S ribosomal protein S15a OS=Homo sapiens OX=9606 GN=RPS15A PE=1 SV=2	0	23.695	24	3	27	3	14.8	10.13	77.1	1.225	RPS15A
High	IsMasterProtein	Q15008	26S proteasome non-ATPase regulatory subunit 6 OS=Homo sapiens OX=9606 GN=PSMD6 PE=1 SV=1	0	6.602	6	2	5	2	45.5	5.62	11.9	1.219	PSMD6
High	IsMasterProtein	Q02878	60S ribosomal protein L6 OS=Homo sapiens OX=9606 GN=RPL6 PE=1 SV=3	0	83.638	37	14	111	14	32.7	10.58	204.76	1.218	RPL6
High	IsMasterProtein	Q8TEQ6	Gem-associated protein 5 OS=Homo sapiens OX=9606 GN=GEMIN5 PE=1 SV=3	0	18.616	3	4	9	4	168.5	6.62	10.45	1.204	GEMIN5
High	IsMasterProtein	Q07021	Complement component 1 Q subcomponent-binding protein, mitochondrial OS=Homo sapiens OX=9606 GN=C1QBP PE=1 SV=1	0	57.796	22	4	32	4	31.3	4.84	95.88	1.195	C1QBP
High	IsMasterProtein	P61353	60S ribosomal protein L27 OS=Homo sapiens OX=9606 GN=RPL27 PE=1 SV=2	0	28.225	29	4	44	4	15.8	10.56	109.6	1.193	RPL27
High	IsMasterProtein	P07741	Adenine phosphoribosyltransferase OS=Homo sapiens OX=9606 GN=APRT PE=1 SV=2	0	11.616	14	2	8	2	19.6	6.02	15.03	1.191	APRT
High	IsMasterProtein	Q16778	Histone H2B type 2-E OS=Homo sapiens OX=9606 GN=HIST2H2BE PE=1 SV=3	0	49.096	41	6	116	2	13.9	10.32	186.64	1.185	HIST2H2BE
High	IsMasterProtein	P51116	Fragile X mental retardation syndrome-related protein 2 OS=Homo sapiens OX=9606 GN=FXR2 PE=1 SV=2	0	6.396	3	2	2	1	74.2	6.23	4.05	1.182	FXR2
High	IsMasterProtein	P84103	Serine/arginine-rich splicing factor 3 OS=Homo sapiens OX=9606 GN=SRSF3 PE=1 SV=1	0	12.002	15	2	15	1	19.3	11.65	32.56	1.174	SRSF3
High	IsMasterProtein	Q9HD33	39S ribosomal protein L47, mitochondrial OS=Homo sapiens OX=9606 GN=MRPL47 PE=1 SV=2	0	9.271	8	2	8	2	29.4	10.37	3.78	1.159	MRPL47
High	IsMasterProtein	Q02750	Dual specificity mitogen-activated protein kinase kinase 1 OS=Homo sapiens OX=9606 GN=MAP2K1 PE=1 SV=2	0	5.768	5	2	11	1	43.4	6.62	16.27	1.153	MAP2K1
High	IsMasterProtein	Q13620	Cullin-4B OS=Homo sapiens OX=9606 GN=CUL4B PE=1 SV=4	0	6.987	4	3	17	2	103.9	7.37	6.47	1.15	CUL4B
High	IsMasterProtein	Q7L576	Cytoplasmic FMR1-interacting protein 1 OS=Homo sapiens OX=9606 GN=CYFIP1 PE=1 SV=1	0	6.456	2	2	7	2	145.1	6.9	1.61	1.148	CYFIP1
High	IsMasterProtein	P51114	Fragile X mental retardation syndrome-related protein 1 OS=Homo sapiens OX=9606 GN=FXR1 PE=1 SV=3	0	4.111	3	2	2	1	69.7	6.15	1.62	1.147	FXR1
High	IsMasterProtein	O43390	Heterogeneous nuclear ribonucleoprotein R OS=Homo sapiens OX=9606 GN=HNRNPR PE=1 SV=1	0	35.217	11	5	30	5	70.9	8.13	79.65	1.132	HNRNPR
High	IsMasterProtein	P10321	HLA class I histocompatibility antigen, C alpha chain OS=Homo sapiens OX=9606 GN=HLA-C PE=1 SV=3	0	26.57	18	4	9	3	40.6	6.04	36.61	1.13	HLA-C
High	IsMasterProtein	P61289	Proteasome activator complex subunit 3 OS=Homo sapiens OX=9606 GN=PSME3 PE=1 SV=1	0	19.271	10	2	9	2	29.5	5.95	23.72	1.114	PSME3
High	IsMasterProtein	O00299	Chloride intracellular channel protein 1 OS=Homo sapiens OX=9606 GN=CLIC1 PE=1 SV=4	0	43.611	39	6	29	6	26.9	5.17	80.71	1.105	CLIC1
High	IsMasterProtein	Q14914	Prostaglandin reductase 1 OS=Homo sapiens OX=9606 GN=PTGR1 PE=1 SV=2	0	7.013	8	3	5	3	35.8	8.29	9.09	1.085	PTGR1
High	IsMasterProtein	O43809	Cleavage and polyadenylation specificity factor subunit 5 OS=Homo sapiens OX=9606 GN=NUDT21 PE=1 SV=1	0	5.699	8	2	2	2	26.2	8.82	5.68	1.069	NUDT21
High	IsMasterProtein	P61006	Ras-related protein Rab-8A OS=Homo sapiens OX=9606 GN=RAB8A PE=1 SV=1	0	13.232	16	3	6	1	23.7	9.07	12.48	1.063	RAB8A
High	IsMasterProtein	P18124	60S ribosomal protein L7 OS=Homo sapiens OX=9606 GN=RPL7 PE=1 SV=1	0	79.9	38	12	103	12	29.2	10.65	224.45	1.062	RPL7
High	IsMasterProtein	P18031	Tyrosine-protein phosphatase non-receptor type 1 OS=Homo sapiens OX=9606 GN=PTPN1 PE=1 SV=1	0	6.666	6	2	2	2	49.9	6.27	1.81	1.055	PTPN1
High	IsMasterProtein	P34931	Heat shock 70 kDa protein 1-like OS=Homo sapiens OX=9606 GN=HSPA1L PE=1 SV=2	0	51.05	14	7	44	1	70.3	6.02	119.56	1.032	HSPA1L
High	IsMasterProtein	O75251	NADH dehydrogenase [ubiquinone] iron-sulfur protein 7, mitochondrial OS=Homo sapiens OX=9606 GN=NDUFS7 PE=1 SV=3	0	7.281	11	2	9	2	23.5	9.99	8.5	1.028	NDUFS7
High	IsMasterProtein	P62424	60S ribosomal protein L7a OS=Homo sapiens OX=9606 GN=RPL7A PE=1 SV=2	0	61.575	32	10	88	10	30	10.61	215.33	1.024	RPL7A
High	IsMasterProtein	P06733	Alpha-enolase OS=Homo sapiens OX=9606 GN=ENO1 PE=1 SV=2	0	74.839	35	12	71	12	47.1	7.39	164.26	1.015	ENO1
High	IsMasterProtein	Q5T6V5	Queuosine salvage protein OS=Homo sapiens OX=9606 GN=C9orf64 PE=1 SV=1	0	11.069	10	3	14	3	39	5.88	18.74	1.01	C9orf64
High	IsMasterProtein	P11142	Heat shock cognate 71 kDa protein OS=Homo sapiens OX=9606 GN=HSPA8 PE=1 SV=1	0	93.361	23	14	101	11	70.9	5.52	244.58	1.009	HSPA8
High	IsMasterProtein	P61254	60S ribosomal protein L26 OS=Homo sapiens OX=9606 GN=RPL26 PE=1 SV=1	0	24.084	38	7	43	2	17.2	10.55	96.05	0.996	RPL26
High	IsMasterProtein	P62805	Histone H4 OS=Homo sapiens OX=9606 GN=H4C1 PE=1 SV=2	0	45.915	52	7	158	7	11.4	11.36	393.71	0.994	HIST1H4A; HIST1H4F; HIST1H4D; HIST1H4J; HIST2H4A; HIST2H4B; HIST1H4H; HIST1H4C; HIST4H4; HIST1H4E; HIST1H4I; HIST1H4B; HIST1H4K; HIST1H4L
High	IsMasterProtein	Q14008	Cytoskeleton-associated protein 5 OS=Homo sapiens OX=9606 GN=CKAP5 PE=1 SV=3	0	5.762	1	2	2	2	225.4	7.8	1.75	0.993	CKAP5
High	IsMasterProtein	Q15785	Mitochondrial import receptor subunit TOM34 OS=Homo sapiens OX=9606 GN=TOMM34 PE=1 SV=2	0	14.512	18	4	6	4	34.5	8.98	5.87	0.992	TOMM34
High	IsMasterProtein	Q562R1	Beta-actin-like protein 2 OS=Homo sapiens OX=9606 GN=ACTBL2 PE=1 SV=2	0	61.63	16	6	165	1	42	5.59	299.78	0.99	ACTBL2
High	IsMasterProtein	Q13907	Isopentenyl-diphosphate Delta-isomerase 1 OS=Homo sapiens OX=9606 GN=IDI1 PE=1 SV=2	0	7.864	14	2	7	2	26.3	6.34	3.99	0.99	IDI1
High	IsMasterProtein	P12277	Creatine kinase B-type OS=Homo sapiens OX=9606 GN=CKB PE=1 SV=1	0	18.72	13	4	15	4	42.6	5.59	18.92	0.974	CKB
High	IsMasterProtein	P22234	Multifunctional protein ADE2 OS=Homo sapiens OX=9606 GN=PAICS PE=1 SV=3	0	12.805	9	4	14	4	47	7.23	21.98	0.969	PAICS
High	IsMasterProtein	O14818	Proteasome subunit alpha type-7 OS=Homo sapiens OX=9606 GN=PSMA7 PE=1 SV=1	0	35.536	28	6	28	6	27.9	8.46	72.27	0.961	PSMA7
High	IsMasterProtein	P30041	Peroxiredoxin-6 OS=Homo sapiens OX=9606 GN=PRDX6 PE=1 SV=3	0	28.693	25	6	32	6	25	6.38	57.34	0.941	PRDX6
High	IsMasterProtein	P78417	Glutathione S-transferase omega-1 OS=Homo sapiens OX=9606 GN=GSTO1 PE=1 SV=2	0	34.998	18	5	29	5	27.5	6.6	65.57	0.932	GSTO1
High	IsMasterProtein	P46777	60S ribosomal protein L5 OS=Homo sapiens OX=9606 GN=RPL5 PE=1 SV=3	0	75.359	34	12	111	12	34.3	9.72	182.9	0.92	RPL5
High	IsMasterProtein	P27348	14-3-3 protein theta OS=Homo sapiens OX=9606 GN=YWHAQ PE=1 SV=1	0	45.969	26	7	37	4	27.7	4.78	76.36	0.912	YWHAQ
High	IsMasterProtein	P46781	40S ribosomal protein S9 OS=Homo sapiens OX=9606 GN=RPS9 PE=1 SV=3	0	27.604	40	10	98	10	22.6	10.65	115.82	0.9	RPS9
High	IsMasterProtein	P80723	Brain acid soluble protein 1 OS=Homo sapiens OX=9606 GN=BASP1 PE=1 SV=2	0	26.81	38	4	10	4	22.7	4.63	23.4	0.889	BASP1
High	IsMasterProtein	P08621	U1 small nuclear ribonucleoprotein 70 kDa OS=Homo sapiens OX=9606 GN=SNRNP70 PE=1 SV=2	0	10.667	10	3	8	3	51.5	9.94	5.08	0.876	SNRNP70
High	IsMasterProtein	P25788	Proteasome subunit alpha type-3 OS=Homo sapiens OX=9606 GN=PSMA3 PE=1 SV=2	0	8.194	9	2	9	2	28.4	5.33	23.41	0.873	PSMA3
High	IsMasterProtein	P40222	Alpha-taxilin OS=Homo sapiens OX=9606 GN=TXLNA PE=1 SV=3	0	6.442	4	2	7	2	61.9	6.52	8.63	0.868	TXLNA
High	IsMasterProtein	P0DMV9	Heat shock 70 kDa protein 1B OS=Homo sapiens OX=9606 GN=HSPA1B PE=1 SV=1	0	54.829	17	9	36	4	70	5.66	85.58	0.853	HSPA1B; HSPA1A
High	IsMasterProtein	Q7L7L0	Histone H2A type 3 OS=Homo sapiens OX=9606 GN=HIST3H2A PE=1 SV=3	0	38.018	35	4	64	1	14.1	11.05	107.8	0.849	HIST3H2A
High	IsMasterProtein	P84243	Histone H3.3 OS=Homo sapiens OX=9606 GN=H3-3A PE=1 SV=2	0	13.678	25	5	60	5	15.3	11.27	84.93	0.847	H3F3A; H3F3AP4; H3F3B
High	IsMasterProtein	P05387	60S acidic ribosomal protein P2 OS=Homo sapiens OX=9606 GN=RPLP2 PE=1 SV=1	0	14.556	61	4	20	4	11.7	4.54	40.01	0.844	RPLP2
High	IsMasterProtein	Q12906	Interleukin enhancer-binding factor 3 OS=Homo sapiens OX=9606 GN=ILF3 PE=1 SV=3	0	45.582	11	7	25	7	95.3	8.76	58.25	0.831	ILF3
High	IsMasterProtein	P14625	Endoplasmin OS=Homo sapiens OX=9606 GN=HSP90B1 PE=1 SV=1	0	25.566	10	8	35	7	92.4	4.84	72.84	0.822	HSP90B1
High	IsMasterProtein	P84090	Enhancer of rudimentary homolog OS=Homo sapiens OX=9606 GN=ERH PE=1 SV=1	0	6.089	17	2	13	2	12.3	5.92	14.62	0.822	ERH
High	IsMasterProtein	P49721	Proteasome subunit beta type-2 OS=Homo sapiens OX=9606 GN=PSMB2 PE=1 SV=1	0	10.687	19	3	6	3	22.8	7.02	7.69	0.811	PSMB2
High	IsMasterProtein	P00367	Glutamate dehydrogenase 1, mitochondrial OS=Homo sapiens OX=9606 GN=GLUD1 PE=1 SV=2	0	28.046	16	6	17	6	61.4	7.8	41.45	0.8	GLUD1
High	IsMasterProtein	Q16881	Thioredoxin reductase 1, cytoplasmic OS=Homo sapiens OX=9606 GN=TXNRD1 PE=1 SV=3	0	16.802	5	3	19	3	70.9	7.39	31.38	0.776	TXNRD1
High	IsMasterProtein	P15531	Nucleoside diphosphate kinase A OS=Homo sapiens OX=9606 GN=NME1 PE=1 SV=1	0	9.637	26	4	7	4	17.1	6.19	6.88	0.764	NME1
High	IsMasterProtein	Q15181	Inorganic pyrophosphatase OS=Homo sapiens OX=9606 GN=PPA1 PE=1 SV=2	0	31.967	22	5	17	5	32.6	5.86	48.88	0.758	PPA1
High	IsMasterProtein	P07910	Heterogeneous nuclear ribonucleoproteins C1/C2 OS=Homo sapiens OX=9606 GN=HNRNPC PE=1 SV=4	0	66.792	26	11	126	11	33.7	5.08	255.09	0.752	HNRNPC
High	IsMasterProtein	Q9ULX6	A-kinase anchor protein 8-like OS=Homo sapiens OX=9606 GN=AKAP8L PE=1 SV=4	0	8.449	4	2	3	2	71.6	5.05	2.29	0.722	AKAP8L
High	IsMasterProtein	P07900	Heat shock protein HSP 90-alpha OS=Homo sapiens OX=9606 GN=HSP90AA1 PE=1 SV=5	0	117.309	28	19	139	9	84.6	5.02	290.95	0.719	HSP90AA1
High	IsMasterProtein	P30050	60S ribosomal protein L12 OS=Homo sapiens OX=9606 GN=RPL12 PE=1 SV=1	0	35.337	50	6	28	6	17.8	9.42	55.22	0.709	RPL12
High	IsMasterProtein	P20618	Proteasome subunit beta type-1 OS=Homo sapiens OX=9606 GN=PSMB1 PE=1 SV=2	0	5.943	10	2	7	2	26.5	8.13	7.56	0.693	PSMB1
High	IsMasterProtein	P51610	Host cell factor 1 OS=Homo sapiens OX=9606 GN=HCFC1 PE=1 SV=2	0	9.757	2	3	10	3	208.6	7.46	17.8	0.676	HCFC1
High	IsMasterProtein	P35237	Serpin B6 OS=Homo sapiens OX=9606 GN=SERPINB6 PE=1 SV=3	0	34.044	24	7	14	6	42.6	5.27	20.29	0.636	SERPINB6
High	IsMasterProtein	Q9NX58	Cell growth-regulating nucleolar protein OS=Homo sapiens OX=9606 GN=LYAR PE=1 SV=2	0	9.583	9	3	5	3	43.6	9.54	7.2	0.596	LYAR
High	IsMasterProtein	P07737	Profilin-1 OS=Homo sapiens OX=9606 GN=PFN1 PE=1 SV=2	0	34.995	46	6	45	6	15	8.27	93.97	0.588	PFN1
High	IsMasterProtein	P63104	14-3-3 protein zeta/delta OS=Homo sapiens OX=9606 GN=YWHAZ PE=1 SV=1	0	59.971	36	9	52	5	27.7	4.79	122.76	0.555	YWHAZ
High	IsMasterProtein	P04083	Annexin A1 OS=Homo sapiens OX=9606 GN=ANXA1 PE=1 SV=2	0	28.279	19	4	10	4	38.7	7.02	18.64	0.545	ANXA1
High	IsMasterProtein	P35241	Radixin OS=Homo sapiens OX=9606 GN=RDX PE=1 SV=1	0	68.017	16	13	102	2	68.5	6.37	200.04	0.543	RDX
High	IsMasterProtein	Q13951	Core-binding factor subunit beta OS=Homo sapiens OX=9606 GN=CBFB PE=1 SV=2	0	7.755	14	2	25	2	21.5	6.6	2.33	0.542	CBFB
High	IsMasterProtein	P42126	Enoyl-CoA delta isomerase 1, mitochondrial OS=Homo sapiens OX=9606 GN=ECI1 PE=1 SV=1	0	5.046	8	3	6	3	32.8	8.54	9.19	0.536	ECI1
High	IsMasterProtein	Q16777	Histone H2A type 2-C OS=Homo sapiens OX=9606 GN=HIST2H2AC PE=1 SV=4	0	41.813	36	4	75	1	14	10.9	146.74	0.512	HIST2H2AC
High	IsMasterProtein	Q9UNX3	60S ribosomal protein L26-like 1 OS=Homo sapiens OX=9606 GN=RPL26L1 PE=1 SV=1	0	17.608	32	6	35	1	17.2	10.55	73	0.501	RPL26L1
High	IsMasterProtein	Q12905	Interleukin enhancer-binding factor 2 OS=Homo sapiens OX=9606 GN=ILF2 PE=1 SV=2	0	29.035	15	4	20	4	43	5.26	39.24	0.5	ILF2
High	IsMasterProtein	P05198	Eukaryotic translation initiation factor 2 subunit 1 OS=Homo sapiens OX=9606 GN=EIF2S1 PE=1 SV=3	0	16.001	12	4	13	4	36.1	5.08	22.28	0.48	EIF2S1
High	IsMasterProtein	P16402	Histone H1.3 OS=Homo sapiens OX=9606 GN=H1-3 PE=1 SV=2	0	15.201	11	3	16	3	22.3	11.02	28.82	0.474	HIST1H1D
High	IsMasterProtein	P26038	Moesin OS=Homo sapiens OX=9606 GN=MSN PE=1 SV=3	0	132.909	32	25	176	14	67.8	6.4	374.91	0.47	MSN
High	IsMasterProtein	P36957	Dihydrolipoyllysine-residue succinyltransferase component of 2-oxoglutarate dehydrogenase complex, mitochondrial OS=Homo sapiens OX=9606 GN=DLST PE=1 SV=4	0	45.515	21	8	69	8	48.7	8.95	171.16	0.455	DLST
High	IsMasterProtein	P36871	Phosphoglucomutase-1 OS=Homo sapiens OX=9606 GN=PGM1 PE=1 SV=3	0	16.671	10	4	7	4	61.4	6.76	11.03	0.445	PGM1
High	IsMasterProtein	P28074	Proteasome subunit beta type-5 OS=Homo sapiens OX=9606 GN=PSMB5 PE=1 SV=3	0	19.886	13	3	10	3	28.5	6.92	22.7	0.442	PSMB5
High	IsMasterProtein	Q9Y678	Coatomer subunit gamma-1 OS=Homo sapiens OX=9606 GN=COPG1 PE=1 SV=1	0	15.47	7	4	5	4	97.7	5.47	6.58	0.436	COPG1
High	IsMasterProtein	P34932	Heat shock 70 kDa protein 4 OS=Homo sapiens OX=9606 GN=HSPA4 PE=1 SV=4	0	21.415	8	5	15	5	94.3	5.19	22.25	0.428	HSPA4
High	IsMasterProtein	P27695	DNA-(apurinic or apyrimidinic site) lyase OS=Homo sapiens OX=9606 GN=APEX1 PE=1 SV=2	0	11.152	7	2	2	2	35.5	8.12	3.07	0.361	APEX1
High	IsMasterProtein	Q9P258	Protein RCC2 OS=Homo sapiens OX=9606 GN=RCC2 PE=1 SV=2	0	6.194	6	3	8	3	56	8.78	8.13	0.321	RCC2
High	IsMasterProtein	Q15436	Protein transport protein Sec23A OS=Homo sapiens OX=9606 GN=SEC23A PE=1 SV=2	0	10.592	3	2	3	2	86.1	7.08	3.67	0.274	SEC23A
High	IsMasterProtein	O15347	High mobility group protein B3 OS=Homo sapiens OX=9606 GN=HMGB3 PE=1 SV=4	0	14.818	20	3	10	3	23	8.37	21.88	0.226	HMGB3
High	IsMasterProtein	P28070	Proteasome subunit beta type-4 OS=Homo sapiens OX=9606 GN=PSMB4 PE=1 SV=4	0	22.937	18	3	7	3	29.2	5.97	17.26	0.208	PSMB4
High	IsMasterProtein	P09429	High mobility group protein B1 OS=Homo sapiens OX=9606 GN=HMGB1 PE=1 SV=3	0	42.148	35	9	30	9	24.9	5.74	57.42	0.147	HMGB1
High	IsMasterProtein	P26583	High mobility group protein B2 OS=Homo sapiens OX=9606 GN=HMGB2 PE=1 SV=2	0	7.346	10	2	6	2	24	7.81	12.88	0.134	HMGB2
High	IsMasterProtein	P00491	Purine nucleoside phosphorylase OS=Homo sapiens OX=9606 GN=PNP PE=1 SV=2	0	17.22	15	3	11	3	32.1	6.95	11.95	0.079	PNP
High	IsMasterProtein	Q5TFE4	5'-nucleotidase domain-containing protein 1 OS=Homo sapiens OX=9606 GN=NT5DC1 PE=1 SV=1	0	18.375	7	3	12	3	51.8	6.35	29.17	0.032	NT5DC1
High	IsMasterProtein	Q15257	Serine/threonine-protein phosphatase 2A activator OS=Homo sapiens OX=9606 GN=PTPA PE=1 SV=3	0	5.601	6	2	4	2	40.6	5.94	0	0.01	PPP2R4; PTPA

## Sheet: Figure S10
Protein FDR Confidence Combined	Master	UniProt Accession	Description	Exp q-value Combined	Sum PEP Score	Coverage in Percent	Number of Peptides	Number of PSMs	Number of Unique Peptides	MW in kDa	calc pI	Score Sequest HT A2 Sequest HT	Abundance Ratio	Gene Symbol
High	IsMasterProtein	Q6S8J3	POTE ankyrin domain family member E OS=Homo sapiens OX=9606 GN=POTEE PE=2 SV=3	0	197.779	11	9	1054	1	121.3	6.2	2612.4	100	POTEE
High	IsMasterProtein	P09104	Gamma-enolase OS=Homo sapiens OX=9606 GN=ENO2 PE=1 SV=3	0	78.118	20	7	389	1	47.2	5.03	572.64	100	ENO2
High	IsMasterProtein	Q71DI3	Histone H3.2 OS=Homo sapiens OX=9606 GN=HIST2H3A PE=1 SV=3	0	32.446	52	7	239	1	15.4	11.27	322.52	100	HIST2H3A; HIST2H3C; HIST2H3D
High	IsMasterProtein	P84085	ADP-ribosylation factor 5 OS=Homo sapiens OX=9606 GN=ARF5 PE=1 SV=2	0	42.707	39	6	33	1	20.5	6.79	66.36	100	ARF5
High	IsMasterProtein	Q14651	Plastin-1 OS=Homo sapiens OX=9606 GN=PLS1 PE=1 SV=2	0	37.582	11	5	27	1	70.2	5.41	59.73	100	PLS1
High	IsMasterProtein	P11216	Glycogen phosphorylase, brain form OS=Homo sapiens OX=9606 GN=PYGB PE=1 SV=5	0	44.868	10	7	24	3	96.6	6.86	68.18	100	PYGB
High	IsMasterProtein	P30154	Serine/threonine-protein phosphatase 2A 65 kDa regulatory subunit A beta isoform OS=Homo sapiens OX=9606 GN=PPP2R1B PE=1 SV=3	0	64.587	14	5	22	2	66.2	4.94	66.27	100	PPP2R1B
High	IsMasterProtein	O43432	Eukaryotic translation initiation factor 4 gamma 3 OS=Homo sapiens OX=9606 GN=EIF4G3 PE=1 SV=2	0	27.721	5	7	21	1	176.5	5.38	38.62	100	EIF4G3
High	IsMasterProtein	Q5T4S7	E3 ubiquitin-protein ligase UBR4 OS=Homo sapiens OX=9606 GN=UBR4 PE=1 SV=1	0	42.979	3	7	21	7	573.5	6.04	30.49	100	UBR4
High	IsMasterProtein	Q9HAV4	Exportin-5 OS=Homo sapiens OX=9606 GN=XPO5 PE=1 SV=1	0	47.213	9	7	20	7	136.2	5.8	43.22	100	XPO5
High	IsMasterProtein	Q9UIA9	Exportin-7 OS=Homo sapiens OX=9606 GN=XPO7 PE=1 SV=3	0	30.056	7	5	20	5	123.8	6.32	27.8	100	XPO7
High	IsMasterProtein	Q99623	Prohibitin-2 OS=Homo sapiens OX=9606 GN=PHB2 PE=1 SV=2	0	38.101	27	6	18	6	33.3	9.83	49.92	100	PHB2
High	IsMasterProtein	Q15287	RNA-binding protein with serine-rich domain 1 OS=Homo sapiens OX=9606 GN=RNPS1 PE=1 SV=1	0	36.575	23	5	17	5	34.2	11.84	46.65	100	RNPS1
High	IsMasterProtein	Q8IZ83	Aldehyde dehydrogenase family 16 member A1 OS=Homo sapiens OX=9606 GN=ALDH16A1 PE=1 SV=2	0	41.024	9	4	15	4	85.1	6.79	36.67	100	ALDH16A1
High	IsMasterProtein	Q02750	Dual specificity mitogen-activated protein kinase kinase 1 OS=Homo sapiens OX=9606 GN=MAP2K1 PE=1 SV=2	0	59.954	24	5	15	3	43.4	6.62	57.22	100	MAP2K1
High	IsMasterProtein	O14617	AP-3 complex subunit delta-1 OS=Homo sapiens OX=9606 GN=AP3D1 PE=1 SV=1	0	29.034	5	3	13	3	130.1	8.48	24.97	100	AP3D1
High	IsMasterProtein	Q8N3U4	Cohesin subunit SA-2 OS=Homo sapiens OX=9606 GN=STAG2 PE=1 SV=3	0	36.801	8	5	13	4	141.2	5.43	28.56	100	STAG2
High	IsMasterProtein	Q10567	AP-1 complex subunit beta-1 OS=Homo sapiens OX=9606 GN=AP1B1 PE=1 SV=2	0	22.455	6	4	13	1	104.6	5.06	9.23	100	AP1B1
High	IsMasterProtein	P11498	Pyruvate carboxylase, mitochondrial OS=Homo sapiens OX=9606 GN=PC PE=1 SV=2	0	32.347	10	5	12	5	129.6	6.84	17.91	100	PC
High	IsMasterProtein	Q13362	Serine/threonine-protein phosphatase 2A 56 kDa regulatory subunit gamma isoform OS=Homo sapiens OX=9606 GN=PPP2R5C PE=1 SV=3	0	25.07	13	4	12	1	61	6.87	28.14	100	PPP2R5C
High	IsMasterProtein	O94874	E3 UFM1-protein ligase 1 OS=Homo sapiens OX=9606 GN=UFL1 PE=1 SV=2	0	23.704	9	4	11	4	89.5	6.79	20.94	100	UFL1
High	IsMasterProtein	Q8TAT6	Nuclear protein localization protein 4 homolog OS=Homo sapiens OX=9606 GN=NPLOC4 PE=1 SV=3	0	30.392	10	3	11	3	68.1	6.38	31.31	100	NPLOC4
High	IsMasterProtein	Q12972	Nuclear inhibitor of protein phosphatase 1 OS=Homo sapiens OX=9606 GN=PPP1R8 PE=1 SV=2	0	35.545	21	5	11	5	38.5	7.37	40.36	100	PPP1R8
High	IsMasterProtein	Q96A33	Coiled-coil domain-containing protein 47 OS=Homo sapiens OX=9606 GN=CCDC47 PE=1 SV=1	0	22.733	9	2	11	2	55.8	4.87	9.19	100	CCDC47
High	IsMasterProtein	P24539	ATP synthase F(0) complex subunit B1, mitochondrial OS=Homo sapiens OX=9606 GN=ATP5PB PE=1 SV=2	0	17.622	16	3	10	3	28.9	9.36	19.38	100	ATP5F1
High	IsMasterProtein	A1L0T0	Acetolactate synthase-like protein OS=Homo sapiens OX=9606 GN=ILVBL PE=1 SV=2	0	31.788	10	3	10	3	67.8	8.15	37.12	100	ILVBL
High	IsMasterProtein	O15027	Protein transport protein Sec16A OS=Homo sapiens OX=9606 GN=SEC16A PE=1 SV=4	0	27.345	4	3	10	3	251.7	5.8	7.04	100
High	IsMasterProtein	O60493	Sorting nexin-3 OS=Homo sapiens OX=9606 GN=SNX3 PE=1 SV=3	0	10.101	13	2	10	1	18.8	8.66	23.55	100	SNX3
High	IsMasterProtein	Q13084	39S ribosomal protein L28, mitochondrial OS=Homo sapiens OX=9606 GN=MRPL28 PE=1 SV=4	0	15.034	18	3	10	3	30.1	8.29	14.24	100	MRPL28
High	IsMasterProtein	Q12769	Nuclear pore complex protein Nup160 OS=Homo sapiens OX=9606 GN=NUP160 PE=1 SV=3	0	18.39	3	3	9	3	162	5.5	12.39	100	NUP160
High	IsMasterProtein	Q9UBU9	Nuclear RNA export factor 1 OS=Homo sapiens OX=9606 GN=NXF1 PE=1 SV=1	0	23.734	9	5	9	5	70.1	8.51	15.43	100	NXF1
High	IsMasterProtein	O95379	Tumor necrosis factor alpha-induced protein 8 OS=Homo sapiens OX=9606 GN=TNFAIP8 PE=1 SV=1	0	28.342	25	2	9	2	23	7.93	20.9	100	TNFAIP8
High	IsMasterProtein	Q14376	UDP-glucose 4-epimerase OS=Homo sapiens OX=9606 GN=GALE PE=1 SV=2	0	26.562	11	2	9	2	38.3	6.73	28.51	100	GALE
High	IsMasterProtein	P13807	Glycogen [starch] synthase, muscle OS=Homo sapiens OX=9606 GN=GYS1 PE=1 SV=2	0	41.972	13	5	9	5	83.7	6.18	30.63	100	GYS1
High	IsMasterProtein	P31040	Succinate dehydrogenase [ubiquinone] flavoprotein subunit, mitochondrial OS=Homo sapiens OX=9606 GN=SDHA PE=1 SV=2	0	35.018	13	4	9	4	72.6	7.39	30.83	100	SDHA
High	IsMasterProtein	O94826	Mitochondrial import receptor subunit TOM70 OS=Homo sapiens OX=9606 GN=TOMM70 PE=1 SV=1	0	27.025	6	2	9	2	67.4	7.12	19.75	100	TOMM70A; TOMM70
High	IsMasterProtein	Q9C005	Protein dpy-30 homolog OS=Homo sapiens OX=9606 GN=DPY30 PE=1 SV=1	0	14.743	36	2	9	2	11.2	4.88	13.72	100	DPY30
High	IsMasterProtein	Q9BV44	THUMP domain-containing protein 3 OS=Homo sapiens OX=9606 GN=THUMPD3 PE=1 SV=1	0	18.363	11	3	9	3	57	6.37	15.02	100	THUMPD3
High	IsMasterProtein	Q15555	Microtubule-associated protein RP/EB family member 2 OS=Homo sapiens OX=9606 GN=MAPRE2 PE=1 SV=1	0	13.165	9	2	9	2	37	5.57	23.14	100	MAPRE2
High	IsMasterProtein	P41227	N-alpha-acetyltransferase 10 OS=Homo sapiens OX=9606 GN=NAA10 PE=1 SV=1	0	21.303	23	3	8	3	26.4	5.64	26.24	100	NAA10
High	IsMasterProtein	Q9BW27	Nuclear pore complex protein Nup85 OS=Homo sapiens OX=9606 GN=NUP85 PE=1 SV=1	0	24.61	7	3	8	3	75	5.55	11.72	100	NUP85
High	IsMasterProtein	Q8TCD5	5'(3')-deoxyribonucleotidase, cytosolic type OS=Homo sapiens OX=9606 GN=NT5C PE=1 SV=2	0	29.99	28	3	8	3	23.4	6.64	11.96	100	NT5C
High	IsMasterProtein	P57678	Gem-associated protein 4 OS=Homo sapiens OX=9606 GN=GEMIN4 PE=1 SV=2	0	10.448	3	2	8	2	120	6.04	12.2	100	GEMIN4
High	IsMasterProtein	Q9H9T3	Elongator complex protein 3 OS=Homo sapiens OX=9606 GN=ELP3 PE=1 SV=2	0	22.449	9	3	8	3	62.2	8.88	23.88	100	ELP3
High	IsMasterProtein	Q14692	Ribosome biogenesis protein BMS1 homolog OS=Homo sapiens OX=9606 GN=BMS1 PE=1 SV=1	0	25.163	5	3	8	3	145.7	6.44	23	100	BMS1
High	IsMasterProtein	Q9UI26	Importin-11 OS=Homo sapiens OX=9606 GN=IPO11 PE=1 SV=1	0	20.472	9	4	8	4	112.5	5.25	4.5	100	IPO11
High	IsMasterProtein	Q9P0J7	E3 ubiquitin-protein ligase KCMF1 OS=Homo sapiens OX=9606 GN=KCMF1 PE=1 SV=2	0	15.441	8	2	8	2	41.9	5.66	6.82	100	KCMF1
High	IsMasterProtein	Q6XQN6	Nicotinate phosphoribosyltransferase OS=Homo sapiens OX=9606 GN=NAPRT PE=1 SV=2	0	21.844	10	2	7	2	57.5	5.68	17.89	100	NAPRT1; NAPRT
High	IsMasterProtein	Q9Y5Y2	Cytosolic Fe-S cluster assembly factor NUBP2 OS=Homo sapiens OX=9606 GN=NUBP2 PE=1 SV=1	0	17.565	20	2	7	2	28.8	5.83	22.42	100	NUBP2
High	IsMasterProtein	Q9H8H2	Probable ATP-dependent RNA helicase DDX31 OS=Homo sapiens OX=9606 GN=DDX31 PE=1 SV=2	0	19.413	5	3	7	3	94	9.99	23.72	100	DDX31
High	IsMasterProtein	Q9UKL0	REST corepressor 1 OS=Homo sapiens OX=9606 GN=RCOR1 PE=1 SV=2	0	21.334	10	3	7	3	53.3	7.03	18.99	100	RCOR1
High	IsMasterProtein	Q9BY77	Polymerase delta-interacting protein 3 OS=Homo sapiens OX=9606 GN=POLDIP3 PE=1 SV=2	0	21.145	14	4	7	4	46.1	9.99	22.33	100	POLDIP3
High	IsMasterProtein	Q0VDF9	Heat shock 70 kDa protein 14 OS=Homo sapiens OX=9606 GN=HSPA14 PE=1 SV=1	0	28.715	14	3	7	3	54.8	5.59	27.07	100	HSPA14
High	IsMasterProtein	Q8IWX8	Calcium homeostasis endoplasmic reticulum protein OS=Homo sapiens OX=9606 GN=CHERP PE=1 SV=3	0	22.674	7	4	7	4	103.6	9.04	19.3	100	CHERP
High	IsMasterProtein	Q9Y312	Protein AAR2 homolog OS=Homo sapiens OX=9606 GN=AAR2 PE=1 SV=2	0	22.358	13	3	7	3	43.4	5.96	20.92	100	AAR2
High	IsMasterProtein	Q9BUJ2	Heterogeneous nuclear ribonucleoprotein U-like protein 1 OS=Homo sapiens OX=9606 GN=HNRNPUL1 PE=1 SV=2	0	18.493	4	2	7	2	95.7	6.92	20.56	100	HNRNPUL1
High	IsMasterProtein	Q96HY6	DDRGK domain-containing protein 1 OS=Homo sapiens OX=9606 GN=DDRGK1 PE=1 SV=2	0	15.413	10	2	7	2	35.6	5.12	1.64	100	DDRGK1
High	IsMasterProtein	P13073	Cytochrome c oxidase subunit 4 isoform 1, mitochondrial OS=Homo sapiens OX=9606 GN=COX4I1 PE=1 SV=1	0	9.244	19	3	7	3	19.6	9.51	15.86	100	COX4I1
High	IsMasterProtein	Q6YN16	Hydroxysteroid dehydrogenase-like protein 2 OS=Homo sapiens OX=9606 GN=HSDL2 PE=1 SV=1	0	25.789	17	3	7	3	45.4	7.99	20.81	100	HSDL2
High	IsMasterProtein	P53384	Cytosolic Fe-S cluster assembly factor NUBP1 OS=Homo sapiens OX=9606 GN=NUBP1 PE=1 SV=2	0	21.054	14	4	7	4	34.5	5.33	9.65	100	NUBP1
High	IsMasterProtein	P11310	Medium-chain specific acyl-CoA dehydrogenase, mitochondrial OS=Homo sapiens OX=9606 GN=ACADM PE=1 SV=1	0	6.824	12	3	7	3	46.6	8.37	8.16	100	ACADM
High	IsMasterProtein	Q15427	Splicing factor 3B subunit 4 OS=Homo sapiens OX=9606 GN=SF3B4 PE=1 SV=1	0	16.995	11	2	7	2	44.4	8.56	27.11	100	SF3B4
High	IsMasterProtein	Q06787	Synaptic functional regulator FMR1 OS=Homo sapiens OX=9606 GN=FMR1 PE=1 SV=1	0	15.263	3	2	7	1	71.1	7.42	14.98	100	FMR1
High	IsMasterProtein	Q13330	Metastasis-associated protein MTA1 OS=Homo sapiens OX=9606 GN=MTA1 PE=1 SV=2	0	16.037	6	4	7	3	80.7	9.26	15.95	100	MTA1
High	IsMasterProtein	Q9P035	Very-long-chain (3R)-3-hydroxyacyl-CoA dehydratase 3 OS=Homo sapiens OX=9606 GN=HACD3 PE=1 SV=2	0	13.811	10	2	6	2	43.1	8.94	19.34	100	PTPLAD1; HACD3
High	IsMasterProtein	P19367	Hexokinase-1 OS=Homo sapiens OX=9606 GN=HK1 PE=1 SV=3	0	10.616	4	4	6	1	102.4	6.8	6.27	100	HK1
High	IsMasterProtein	Q8NFF5	FAD synthase OS=Homo sapiens OX=9606 GN=FLAD1 PE=1 SV=1	0	21.367	9	3	6	3	65.2	6.93	12.12	100	FLAD1
High	IsMasterProtein	Q66PJ3	ADP-ribosylation factor-like protein 6-interacting protein 4 OS=Homo sapiens OX=9606 GN=ARL6IP4 PE=1 SV=2	0	9.339	4	2	6	2	44.9	10.93	18.55	100	ARL6IP4
High	IsMasterProtein	Q96QD9	UAP56-interacting factor OS=Homo sapiens OX=9606 GN=FYTTD1 PE=1 SV=3	0	16.534	9	2	6	2	35.8	11.78	21.74	100	FYTTD1
High	IsMasterProtein	Q8TEQ6	Gem-associated protein 5 OS=Homo sapiens OX=9606 GN=GEMIN5 PE=1 SV=3	0	25.47	4	3	6	3	168.5	6.62	12.82	100	GEMIN5
High	IsMasterProtein	Q9Y4E8	Ubiquitin carboxyl-terminal hydrolase 15 OS=Homo sapiens OX=9606 GN=USP15 PE=1 SV=3	0	13.256	3	3	6	3	112.3	5.22	6.5	100	USP15
High	IsMasterProtein	Q6NUK1	Calcium-binding mitochondrial carrier protein SCaMC-1 OS=Homo sapiens OX=9606 GN=SLC25A24 PE=1 SV=2	0	9.057	5	2	6	2	53.3	6.33	6.21	100	SLC25A24
High	IsMasterProtein	Q9BQL6	Fermitin family homolog 1 OS=Homo sapiens OX=9606 GN=FERMT1 PE=1 SV=1	0	10.269	4	2	6	1	77.4	6.28	8.42	100	FERMT1
High	IsMasterProtein	Q93052	Lipoma-preferred partner OS=Homo sapiens OX=9606 GN=LPP PE=1 SV=1	0	23.983	7	3	6	3	65.7	7.37	18.92	100	LPP
High	IsMasterProtein	Q9HDC9	Adipocyte plasma membrane-associated protein OS=Homo sapiens OX=9606 GN=APMAP PE=1 SV=2	0	14.175	9	2	6	2	46.5	6.16	17.97	100	APMAP
High	IsMasterProtein	Q9NU22	Midasin OS=Homo sapiens OX=9606 GN=MDN1 PE=1 SV=2	0	14.21	1	3	6	3	632.4	5.68	8.26	100	MDN1
High	IsMasterProtein	Q9BTC0	Death-inducer obliterator 1 OS=Homo sapiens OX=9606 GN=DIDO1 PE=1 SV=5	0	11.846	1	2	6	2	243.7	7.88	7.67	100	DIDO1
High	IsMasterProtein	P17480	Nucleolar transcription factor 1 OS=Homo sapiens OX=9606 GN=UBTF PE=1 SV=1	0	11.903	4	2	6	2	89.4	5.81	16.5	100	UBTF
High	IsMasterProtein	Q9NVI1	Fanconi anemia group I protein OS=Homo sapiens OX=9606 GN=FANCI PE=1 SV=4	0	7.915	2	2	5	2	149.2	6.74	4.1	100	FANCI
High	IsMasterProtein	Q92621	Nuclear pore complex protein Nup205 OS=Homo sapiens OX=9606 GN=NUP205 PE=1 SV=3	0	17.962	3	3	5	3	227.8	6.19	8.68	100	NUP205
High	IsMasterProtein	Q92620	Pre-mRNA-splicing factor ATP-dependent RNA helicase PRP16 OS=Homo sapiens OX=9606 GN=DHX38 PE=1 SV=2	0	10.306	3	2	5	2	140.4	6.54	8.7	100	DHX38
High	IsMasterProtein	Q03701	CCAAT/enhancer-binding protein zeta OS=Homo sapiens OX=9606 GN=CEBPZ PE=1 SV=3	0	14.614	4	2	5	2	120.9	5.94	16.17	100	CEBPZ
High	IsMasterProtein	Q00535	Cyclin-dependent-like kinase 5 OS=Homo sapiens OX=9606 GN=CDK5 PE=1 SV=3	0	3.996	5	2	5	1	33.3	7.66	9.17	100	CDK5
High	IsMasterProtein	O43237	Cytoplasmic dynein 1 light intermediate chain 2 OS=Homo sapiens OX=9606 GN=DYNC1LI2 PE=1 SV=1	0	18.472	9	3	5	3	54.1	6.38	8.58	100	DYNC1LI2
High	IsMasterProtein	P49005	DNA polymerase delta subunit 2 OS=Homo sapiens OX=9606 GN=POLD2 PE=1 SV=1	0	21.673	12	3	5	3	51.3	5.58	17.78	100	POLD2
High	IsMasterProtein	P46734	Dual specificity mitogen-activated protein kinase kinase 3 OS=Homo sapiens OX=9606 GN=MAP2K3 PE=1 SV=2	0	16.356	19	4	5	4	39.3	7.43	5.28	100	MAP2K3
High	IsMasterProtein	Q27J81	Inverted formin-2 OS=Homo sapiens OX=9606 GN=INF2 PE=1 SV=2	0	25.57	4	3	5	3	135.5	5.38	11.81	100	INF2
High	IsMasterProtein	Q8TC12	Retinol dehydrogenase 11 OS=Homo sapiens OX=9606 GN=RDH11 PE=1 SV=2	0	7.965	8	2	5	2	35.4	8.82	14.74	100	RDH11
High	IsMasterProtein	P57740	Nuclear pore complex protein Nup107 OS=Homo sapiens OX=9606 GN=NUP107 PE=1 SV=1	0	13.699	5	3	5	3	106.3	5.43	2.66	100	NUP107
High	IsMasterProtein	Q16762	Thiosulfate sulfurtransferase OS=Homo sapiens OX=9606 GN=TST PE=1 SV=4	0	24.729	14	3	5	3	33.4	7.25	18.62	100	TST
High	IsMasterProtein	P52735	Guanine nucleotide exchange factor VAV2 OS=Homo sapiens OX=9606 GN=VAV2 PE=1 SV=2	0	10.267	4	2	5	2	101.2	7.08	6.69	100	VAV2
High	IsMasterProtein	Q9H4A6	Golgi phosphoprotein 3 OS=Homo sapiens OX=9606 GN=GOLPH3 PE=1 SV=1	0	7.04	13	2	5	2	33.8	6.44	0	100	GOLPH3
High	IsMasterProtein	Q9UJS0	Calcium-binding mitochondrial carrier protein Aralar2 OS=Homo sapiens OX=9606 GN=SLC25A13 PE=1 SV=2	0	11.571	4	2	5	2	74.1	8.62	6.95	100	SLC25A13
High	IsMasterProtein	O76031	ATP-dependent Clp protease ATP-binding subunit clpX-like, mitochondrial OS=Homo sapiens OX=9606 GN=CLPX PE=1 SV=2	0	11.217	4	2	5	2	69.2	7.58	14.41	100	CLPX
High	IsMasterProtein	Q9NWU5	39S ribosomal protein L22, mitochondrial OS=Homo sapiens OX=9606 GN=MRPL22 PE=1 SV=1	0	15.295	15	3	5	3	23.6	9.94	14.96	100	MRPL22
High	IsMasterProtein	P35250	Replication factor C subunit 2 OS=Homo sapiens OX=9606 GN=RFC2 PE=1 SV=3	0	15.886	8	2	5	2	39.1	6.44	13.69	100	RFC2
High	IsMasterProtein	Q69YN4	Protein virilizer homolog OS=Homo sapiens OX=9606 GN=VIRMA PE=1 SV=2	0	21.858	3	4	5	4	201.9	5.01	5.94	100	KIAA1429; VIRMA
High	IsMasterProtein	O94804	Serine/threonine-protein kinase 10 OS=Homo sapiens OX=9606 GN=STK10 PE=1 SV=1	0	10.062	3	2	5	1	112.1	6.95	7.47	100	STK10
High	IsMasterProtein	Q6PCB5	Lysine-specific demethylase RSBN1L OS=Homo sapiens OX=9606 GN=RSBN1L PE=1 SV=2	0	13.246	3	2	5	1	94.8	8.78	14.01	100	RSBN1L
High	IsMasterProtein	Q92538	Golgi-specific brefeldin A-resistance guanine nucleotide exchange factor 1 OS=Homo sapiens OX=9606 GN=GBF1 PE=1 SV=2	0	11.137	2	2	4	2	206.3	5.73	11.4	100	GBF1
High	IsMasterProtein	P13984	General transcription factor IIF subunit 2 OS=Homo sapiens OX=9606 GN=GTF2F2 PE=1 SV=2	0	20.609	19	2	4	2	28.4	9.23	16.49	100	GTF2F2
High	IsMasterProtein	Q96T76	MMS19 nucleotide excision repair protein homolog OS=Homo sapiens OX=9606 GN=MMS19 PE=1 SV=2	0	13.389	3	2	4	2	113.2	6.35	2.58	100	MMS19
High	IsMasterProtein	Q9H223	EH domain-containing protein 4 OS=Homo sapiens OX=9606 GN=EHD4 PE=1 SV=1	0	6.309	5	2	4	2	61.1	6.76	9.74	100	EHD4
High	IsMasterProtein	P52435	DNA-directed RNA polymerase II subunit RPB11-a OS=Homo sapiens OX=9606 GN=POLR2J PE=1 SV=1	0	7.012	32	2	4	2	13.3	5.86	1.74	100	POLR2J
High	IsMasterProtein	O95292	Vesicle-associated membrane protein-associated protein B/C OS=Homo sapiens OX=9606 GN=VAPB PE=1 SV=3	0	15.279	19	4	4	4	27.2	7.3	10.21	100	VAPB
High	IsMasterProtein	Q7Z2T5	TRMT1-like protein OS=Homo sapiens OX=9606 GN=TRMT1L PE=1 SV=2	0	13.144	5	2	4	2	81.7	7.88	10.69	100	TRMT1L
High	IsMasterProtein	Q9BSC4	Nucleolar protein 10 OS=Homo sapiens OX=9606 GN=NOL10 PE=1 SV=1	0	8.794	6	2	4	2	80.3	8.46	2.15	100	NOL10
High	IsMasterProtein	Q13618	Cullin-3 OS=Homo sapiens OX=9606 GN=CUL3 PE=1 SV=2	0	10.099	5	2	4	2	88.9	8.48	11.34	100	CUL3
High	IsMasterProtein	O75027	ATP-binding cassette sub-family B member 7, mitochondrial OS=Homo sapiens OX=9606 GN=ABCB7 PE=1 SV=2	0.003	2.846	3	2	4	2	82.6	9.33	1.6	100	ABCB7
High	IsMasterProtein	Q10570	Cleavage and polyadenylation specificity factor subunit 1 OS=Homo sapiens OX=9606 GN=CPSF1 PE=1 SV=2	0	15.597	2	2	4	2	160.8	6.4	11.38	100	CPSF1
High	IsMasterProtein	Q5QJE6	Deoxynucleotidyltransferase terminal-interacting protein 2 OS=Homo sapiens OX=9606 GN=DNTTIP2 PE=1 SV=2	0	13.211	2	2	4	2	84.4	6.16	10.54	100	DNTTIP2
High	IsMasterProtein	Q9UNI6	Dual specificity protein phosphatase 12 OS=Homo sapiens OX=9606 GN=DUSP12 PE=1 SV=1	0	17.363	9	2	4	2	37.7	6.84	14.89	100	DUSP12
High	IsMasterProtein	Q9UNS2	COP9 signalosome complex subunit 3 OS=Homo sapiens OX=9606 GN=COPS3 PE=1 SV=3	0	13.122	9	2	4	2	47.8	6.65	10.04	100	COPS3
High	IsMasterProtein	Q9GZZ9	Ubiquitin-like modifier-activating enzyme 5 OS=Homo sapiens OX=9606 GN=UBA5 PE=1 SV=1	0	12.047	11	2	4	2	44.8	4.84	13.71	100	UBA5
High	IsMasterProtein	O60216	Double-strand-break repair protein rad21 homolog OS=Homo sapiens OX=9606 GN=RAD21 PE=1 SV=2	0	10.299	3	2	4	2	71.6	4.65	14.59	100	RAD21
High	IsMasterProtein	O60437	Periplakin OS=Homo sapiens OX=9606 GN=PPL PE=1 SV=4	0	12.954	3	3	4	3	204.6	5.6	7.07	100	PPL
High	IsMasterProtein	Q9BW92	Threonine--tRNA ligase, mitochondrial OS=Homo sapiens OX=9606 GN=TARS2 PE=1 SV=1	0	11.373	5	2	4	2	81	7.3	6.99	100	TARS2
High	IsMasterProtein	O95239	Chromosome-associated kinesin KIF4A OS=Homo sapiens OX=9606 GN=KIF4A PE=1 SV=3	0	14.261	3	2	4	2	139.8	6.27	13.18	100	KIF4A
High	IsMasterProtein	Q5K651	Sterile alpha motif domain-containing protein 9 OS=Homo sapiens OX=9606 GN=SAMD9 PE=1 SV=1	0	17.226	3	3	4	3	184.2	7.83	4.95	100	SAMD9
High	IsMasterProtein	Q8TF05	Serine/threonine-protein phosphatase 4 regulatory subunit 1 OS=Homo sapiens OX=9606 GN=PPP4R1 PE=1 SV=1	0	6.986	3	2	4	2	106.9	4.77	3.27	100	PPP4R1
High	IsMasterProtein	Q9Y697	Cysteine desulfurase, mitochondrial OS=Homo sapiens OX=9606 GN=NFS1 PE=1 SV=3	0	5.859	6	2	4	2	50.2	8.31	6.85	100	NFS1
High	IsMasterProtein	Q9NZ01	Very-long-chain enoyl-CoA reductase OS=Homo sapiens OX=9606 GN=TECR PE=1 SV=1	0	12.54	9	2	4	2	36	9.45	13.47	100	TECR
High	IsMasterProtein	O00186	Syntaxin-binding protein 3 OS=Homo sapiens OX=9606 GN=STXBP3 PE=1 SV=2	0	5.983	6	2	4	2	67.7	7.8	0	100	STXBP3
High	IsMasterProtein	Q86U38	Nucleolar protein 9 OS=Homo sapiens OX=9606 GN=NOP9 PE=1 SV=1	0	9.08	5	2	4	2	69.4	7.28	6.4	100	NOP9
High	IsMasterProtein	Q9H6S0	3'-5' RNA helicase YTHDC2 OS=Homo sapiens OX=9606 GN=YTHDC2 PE=1 SV=2	0	12.249	4	3	4	3	160.1	8.4	4.09	100	YTHDC2
High	IsMasterProtein	Q9HCD5	Nuclear receptor coactivator 5 OS=Homo sapiens OX=9606 GN=NCOA5 PE=1 SV=2	0	19.256	10	3	4	3	65.5	9.6	12.25	100	NCOA5
High	IsMasterProtein	Q8IWZ3	Ankyrin repeat and KH domain-containing protein 1 OS=Homo sapiens OX=9606 GN=ANKHD1 PE=1 SV=1	0	14.335	1	2	3	2	269.3	5.73	8.85	100	ANKHD1; ANKHD1-EIF4EBP3
High	IsMasterProtein	Q9UKG1	DCC-interacting protein 13-alpha OS=Homo sapiens OX=9606 GN=APPL1 PE=1 SV=1	0	9.663	9	2	3	2	79.6	5.41	5.14	100	APPL1
High	IsMasterProtein	P80217	Interferon-induced 35 kDa protein OS=Homo sapiens OX=9606 GN=IFI35 PE=1 SV=5	0	5.98	8	2	3	2	31.5	6.09	0	100	IFI35
High	IsMasterProtein	Q9Y508	E3 ubiquitin-protein ligase RNF114 OS=Homo sapiens OX=9606 GN=RNF114 PE=1 SV=1	0	9.209	13	2	3	2	25.7	7.25	7.84	100	RNF114
High	IsMasterProtein	Q9UNX4	WD repeat-containing protein 3 OS=Homo sapiens OX=9606 GN=WDR3 PE=1 SV=1	0	9.803	3	2	3	2	106	6.64	7.37	100	WDR3
High	IsMasterProtein	O43598	2'-deoxynucleoside 5'-phosphate N-hydrolase 1 OS=Homo sapiens OX=9606 GN=DNPH1 PE=1 SV=1	0	12.492	20	2	3	2	19.1	5.05	9.09	100	C6orf108; DNPH1
High	IsMasterProtein	Q06587	E3 ubiquitin-protein ligase RING1 OS=Homo sapiens OX=9606 GN=RING1 PE=1 SV=2	0	9.152	8	2	3	2	42.4	5.62	9.3	100	RING1
High	IsMasterProtein	Q9NX20	39S ribosomal protein L16, mitochondrial OS=Homo sapiens OX=9606 GN=MRPL16 PE=1 SV=1	0	10.208	11	2	3	2	28.4	10.13	7.82	100	MRPL16
High	IsMasterProtein	P52306	Rap1 GTPase-GDP dissociation stimulator 1 OS=Homo sapiens OX=9606 GN=RAP1GDS1 PE=1 SV=3	0	14.072	6	2	3	2	66.3	5.31	5.27	100	RAP1GDS1
High	IsMasterProtein	O95155	Ubiquitin conjugation factor E4 B OS=Homo sapiens OX=9606 GN=UBE4B PE=1 SV=1	0	8.968	2	2	3	2	146.1	6.55	3.45	100	UBE4B
High	IsMasterProtein	Q9Y6C9	Mitochondrial carrier homolog 2 OS=Homo sapiens OX=9606 GN=MTCH2 PE=1 SV=1	0	12.642	10	2	3	2	33.3	7.97	10.87	100	MTCH2
High	IsMasterProtein	P16455	Methylated-DNA--protein-cysteine methyltransferase OS=Homo sapiens OX=9606 GN=MGMT PE=1 SV=1	0	14.702	17	2	3	2	21.6	8.1	9.35	100	MGMT
High	IsMasterProtein	Q6PIU2	Neutral cholesterol ester hydrolase 1 OS=Homo sapiens OX=9606 GN=NCEH1 PE=1 SV=3	0	7.268	7	2	3	2	45.8	7.23	6.27	100	NCEH1
High	IsMasterProtein	O60524	Nuclear export mediator factor NEMF OS=Homo sapiens OX=9606 GN=NEMF PE=1 SV=4	0	4.521	2	2	3	2	122.9	6.35	4.23	100	NEMF
High	IsMasterProtein	O95163	Elongator complex protein 1 OS=Homo sapiens OX=9606 GN=ELP1 PE=1 SV=3	0	18.225	2	2	3	2	150.2	5.94	8.96	100	IKBKAP; ELP1
High	IsMasterProtein	O95716	Ras-related protein Rab-3D OS=Homo sapiens OX=9606 GN=RAB3D PE=1 SV=1	0	12.45	12	2	3	1	24.3	4.93	6.42	100	RAB3D
High	IsMasterProtein	P40937	Replication factor C subunit 5 OS=Homo sapiens OX=9606 GN=RFC5 PE=1 SV=1	0	17.571	13	3	3	3	38.5	7.2	7.9	100	RFC5
High	IsMasterProtein	Q86TB9	Protein PAT1 homolog 1 OS=Homo sapiens OX=9606 GN=PATL1 PE=1 SV=2	0	10.463	5	2	3	2	86.8	6.67	4.73	100	PATL1
High	IsMasterProtein	Q9NVD7	Alpha-parvin OS=Homo sapiens OX=9606 GN=PARVA PE=1 SV=1	0	11.993	6	2	3	2	42.2	5.95	5.62	100	PARVA
High	IsMasterProtein	Q9NSI2	Protein FAM207A OS=Homo sapiens OX=9606 GN=FAM207A PE=1 SV=2	0	21.102	16	2	3	2	25.4	11.08	10.47	100	FAM207A
High	IsMasterProtein	Q96N66	Lysophospholipid acyltransferase 7 OS=Homo sapiens OX=9606 GN=MBOAT7 PE=1 SV=2	0	12.952	6	2	2	2	52.7	8.97	5.87	100	MBOAT7
High	IsMasterProtein	P51648	Aldehyde dehydrogenase family 3 member A2 OS=Homo sapiens OX=9606 GN=ALDH3A2 PE=1 SV=1	0	6.371	5	2	2	2	54.8	7.88	5.04	100	ALDH3A2
High	IsMasterProtein	Q5T8P6	RNA-binding protein 26 OS=Homo sapiens OX=9606 GN=RBM26 PE=1 SV=3	0	7.488	3	2	2	1	113.5	9.16	6.7	100	RBM26
High	IsMasterProtein	Q00653	Nuclear factor NF-kappa-B p100 subunit OS=Homo sapiens OX=9606 GN=NFKB2 PE=1 SV=4	0	8.085	4	2	2	2	96.7	6.25	4.92	100	NFKB2
High	IsMasterProtein	Q7Z478	ATP-dependent RNA helicase DHX29 OS=Homo sapiens OX=9606 GN=DHX29 PE=1 SV=2	0	9.371	2	2	2	2	155.1	8.09	4.2	100	DHX29
High	IsMasterProtein	Q8WVM7	Cohesin subunit SA-1 OS=Homo sapiens OX=9606 GN=STAG1 PE=1 SV=3	0	4.242	2	2	2	1	144.3	5.59	4.49	100	STAG1
High	IsMasterProtein	O00566	U3 small nucleolar ribonucleoprotein protein MPP10 OS=Homo sapiens OX=9606 GN=MPHOSPH10 PE=1 SV=2	0	8.208	6	2	2	2	78.8	4.86	4.6	100	MPHOSPH10
High	IsMasterProtein	P24928	DNA-directed RNA polymerase II subunit RPB1 OS=Homo sapiens OX=9606 GN=POLR2A PE=1 SV=2	0	10.889	2	2	2	2	217	7.37	6.24	100	POLR2A
High	IsMasterProtein	Q6IN85	Serine/threonine-protein phosphatase 4 regulatory subunit 3A OS=Homo sapiens OX=9606 GN=PPP4R3A PE=1 SV=1	0	11.232	4	2	2	2	95.3	4.94	3.43	100	SMEK1; PPP4R3A
High	IsMasterProtein	Q5SY16	Polynucleotide 5'-hydroxyl-kinase NOL9 OS=Homo sapiens OX=9606 GN=NOL9 PE=1 SV=1	0	10.21	5	2	2	2	79.3	9.13	4.73	100	NOL9
High	IsMasterProtein	Q9UHR6	Zinc finger HIT domain-containing protein 2 OS=Homo sapiens OX=9606 GN=ZNHIT2 PE=1 SV=1	0	11.713	7	2	2	2	42.9	5.99	5.61	100	ZNHIT2
High	IsMasterProtein	Q9H4L4	Sentrin-specific protease 3 OS=Homo sapiens OX=9606 GN=SENP3 PE=1 SV=2	0	14.043	6	2	2	2	65	8.56	6.25	100	SENP3
High	IsMasterProtein	Q9NUJ1	Mycophenolic acid acyl-glucuronide esterase, mitochondrial OS=Homo sapiens OX=9606 GN=ABHD10 PE=1 SV=1	0	5.332	9	2	2	2	33.9	8.57	0	100	ABHD10
High	IsMasterProtein	Q07065	Cytoskeleton-associated protein 4 OS=Homo sapiens OX=9606 GN=CKAP4 PE=1 SV=2	0	18.132	5	2	2	2	66	5.92	7.06	100	CKAP4
High	IsMasterProtein	P67812	Signal peptidase complex catalytic subunit SEC11A OS=Homo sapiens OX=9606 GN=SEC11A PE=1 SV=1	0	15.599	7	2	2	2	20.6	9.48	6.1	100	SEC11A
High	IsMasterProtein	Q16891	MICOS complex subunit MIC60 OS=Homo sapiens OX=9606 GN=IMMT PE=1 SV=1	0	6.513	4	2	2	2	83.6	6.48	6.76	100	IMMT
High	IsMasterProtein	P31483	Nucleolysin TIA-1 isoform p40 OS=Homo sapiens OX=9606 GN=TIA1 PE=1 SV=3	0	6.69	9	2	2	2	42.9	7.74	2.05	100	TIA1
High	IsMasterProtein	P04350	Tubulin beta-4A chain OS=Homo sapiens OX=9606 GN=TUBB4A PE=1 SV=2	0	386.805	66	23	450	1	49.6	4.88	1346.13	78.536	TUBB4A
High	IsMasterProtein	O60518	Ran-binding protein 6 OS=Homo sapiens OX=9606 GN=RANBP6 PE=1 SV=2	0	31.283	8	7	22	3	124.6	5.01	28.55	61.823	RANBP6
High	IsMasterProtein	P35610	Sterol O-acyltransferase 1 OS=Homo sapiens OX=9606 GN=SOAT1 PE=1 SV=3	0	20.555	5	2	11	2	64.7	8.94	31.5	56.65	SOAT1
High	IsMasterProtein	Q9H0S4	Probable ATP-dependent RNA helicase DDX47 OS=Homo sapiens OX=9606 GN=DDX47 PE=1 SV=1	0	13.032	8	2	4	2	50.6	9.1	12.26	52.874	DDX47
High	IsMasterProtein	P82673	28S ribosomal protein S35, mitochondrial OS=Homo sapiens OX=9606 GN=MRPS35 PE=1 SV=1	0	12.257	11	2	4	2	36.8	8.24	10.8	51.724	MRPS35
High	IsMasterProtein	P61224	Ras-related protein Rap-1b OS=Homo sapiens OX=9606 GN=RAP1B PE=1 SV=1	0	17.387	8	2	5	2	20.8	5.78	10.7	47.884	RAP1B
High	IsMasterProtein	Q9BQ39	ATP-dependent RNA helicase DDX50 OS=Homo sapiens OX=9606 GN=DDX50 PE=1 SV=1	0	24.287	7	3	18	1	82.5	9.17	58.64	46.711	DDX50
High	IsMasterProtein	P15924	Desmoplakin OS=Homo sapiens OX=9606 GN=DSP PE=1 SV=3	0	87.239	7	11	25	11	331.6	6.81	79.09	43.617	DSP
High	IsMasterProtein	Q05639	Elongation factor 1-alpha 2 OS=Homo sapiens OX=9606 GN=EEF1A2 PE=1 SV=1	0	176.761	50	15	406	3	50.4	9.03	673.73	39.268	EEF1A2
High	IsMasterProtein	P62273	40S ribosomal protein S29 OS=Homo sapiens OX=9606 GN=RPS29 PE=1 SV=2	0	4.721	27	3	31	3	6.7	10.13	19.23	35.605	RPS29
High	IsMasterProtein	Q96T37	RNA-binding protein 15 OS=Homo sapiens OX=9606 GN=RBM15 PE=1 SV=2	0	33.897	9	5	10	5	107.1	10.08	29.5	34.898	RBM15
High	IsMasterProtein	Q8NI36	WD repeat-containing protein 36 OS=Homo sapiens OX=9606 GN=WDR36 PE=1 SV=1	0	11.345	5	2	6	2	105.3	7.53	4.4	34.676	WDR36
High	IsMasterProtein	Q6P2E9	Enhancer of mRNA-decapping protein 4 OS=Homo sapiens OX=9606 GN=EDC4 PE=1 SV=1	0	14.28	2	2	4	2	151.6	5.86	14.6	33.886	EDC4
High	IsMasterProtein	Q8WVV9	Heterogeneous nuclear ribonucleoprotein L-like OS=Homo sapiens OX=9606 GN=HNRNPLL PE=1 SV=1	0	33.08	12	5	12	4	60	7.72	36.16	33.171	HNRNPLL; HNRPLL
High	IsMasterProtein	P49023	Paxillin OS=Homo sapiens OX=9606 GN=PXN PE=1 SV=3	0	10.18	4	2	4	2	64.5	6.19	11.79	31.813	PXN
High	IsMasterProtein	P55795	Heterogeneous nuclear ribonucleoprotein H2 OS=Homo sapiens OX=9606 GN=HNRNPH2 PE=1 SV=1	0	138.617	37	13	81	5	49.2	6.3	248.55	31.711	HNRNPH2
High	IsMasterProtein	Q71U36	Tubulin alpha-1A chain OS=Homo sapiens OX=9606 GN=TUBA1A PE=1 SV=1	0	374.101	79	28	379	2	50.1	5.06	1150.71	30.571	TUBA1A
High	IsMasterProtein	Q9BY32	Inosine triphosphate pyrophosphatase OS=Homo sapiens OX=9606 GN=ITPA PE=1 SV=2	0	29.047	32	4	13	4	21.4	5.66	29.08	26.727	ITPA
High	IsMasterProtein	P21964	Catechol O-methyltransferase OS=Homo sapiens OX=9606 GN=COMT PE=1 SV=2	0	46.824	31	5	9	5	30	5.47	33.59	26.554	COMT
High	IsMasterProtein	P84243	Histone H3.3 OS=Homo sapiens OX=9606 GN=H3-3A PE=1 SV=2	0	42.528	52	7	240	1	15.3	11.27	330.11	25.848	H3F3A; H3F3AP4; H3F3B
High	IsMasterProtein	Q9UM00	Calcium load-activated calcium channel OS=Homo sapiens OX=9606 GN=TMCO1 PE=1 SV=2	0	10.921	10	2	4	2	27.1	10.26	11.22	25.592
High	IsMasterProtein	O15143	Actin-related protein 2/3 complex subunit 1B OS=Homo sapiens OX=9606 GN=ARPC1B PE=1 SV=3	0	23.875	16	4	10	4	40.9	8.35	30.8	25.01	ARPC1B
High	IsMasterProtein	P55084	Trifunctional enzyme subunit beta, mitochondrial OS=Homo sapiens OX=9606 GN=HADHB PE=1 SV=3	0	39.356	14	5	17	5	51.3	9.41	50.56	24.887	HADHB
High	IsMasterProtein	P36542	ATP synthase subunit gamma, mitochondrial OS=Homo sapiens OX=9606 GN=ATP5F1C PE=1 SV=1	0	38.164	27	7	33	7	33	9.22	79.02	24.689	ATP5C1
High	IsMasterProtein	Q9BPX3	Condensin complex subunit 3 OS=Homo sapiens OX=9606 GN=NCAPG PE=1 SV=1	0	28.27	5	4	9	4	114.3	5.59	26.59	24.063	NCAPG
High	IsMasterProtein	P50416	Carnitine O-palmitoyltransferase 1, liver isoform OS=Homo sapiens OX=9606 GN=CPT1A PE=1 SV=2	0	25.665	9	5	9	5	88.3	8.65	24.6	23.813	CPT1A
High	IsMasterProtein	Q9NQ88	Fructose-2,6-bisphosphatase TIGAR OS=Homo sapiens OX=9606 GN=TIGAR PE=1 SV=1	0	20.891	21	3	4	3	30	7.69	9.24	23.276	C12orf5; TIGAR
High	IsMasterProtein	P12236	ADP/ATP translocase 3 OS=Homo sapiens OX=9606 GN=SLC25A6 PE=1 SV=4	0	55.616	40	12	47	4	32.8	9.74	107.32	23.155	SLC25A6
High	IsMasterProtein	Q9Y224	RNA transcription, translation and transport factor protein OS=Homo sapiens OX=9606 GN=RTRAF PE=1 SV=1	0	64.183	44	8	26	8	28.1	6.65	80.01	23.069	C14orf166; RTRAF
High	IsMasterProtein	Q8WYA6	Beta-catenin-like protein 1 OS=Homo sapiens OX=9606 GN=CTNNBL1 PE=1 SV=1	0	19.352	9	4	10	4	65.1	5.05	28.46	22.802	CTNNBL1
High	IsMasterProtein	Q9NY61	Protein AATF OS=Homo sapiens OX=9606 GN=AATF PE=1 SV=1	0	29.199	16	5	9	5	63.1	4.94	25.13	22.67	AATF
High	IsMasterProtein	Q96C19	EF-hand domain-containing protein D2 OS=Homo sapiens OX=9606 GN=EFHD2 PE=1 SV=1	0	5.681	7	2	5	2	26.7	5.2	3.28	22.641	EFHD2
High	IsMasterProtein	Q15645	Pachytene checkpoint protein 2 homolog OS=Homo sapiens OX=9606 GN=TRIP13 PE=1 SV=2	0	31.682	16	5	11	5	48.5	6.09	29.5	21.206	TRIP13
High	IsMasterProtein	Q8IXM3	39S ribosomal protein L41, mitochondrial OS=Homo sapiens OX=9606 GN=MRPL41 PE=1 SV=1	0	19.836	35	2	10	2	15.4	9.57	28.32	21.118	MRPL41
High	IsMasterProtein	O95782	AP-2 complex subunit alpha-1 OS=Homo sapiens OX=9606 GN=AP2A1 PE=1 SV=3	0	20.02	7	3	8	3	107.5	7.03	23.71	20.627	AP2A1
High	IsMasterProtein	P09874	Poly [ADP-ribose] polymerase 1 OS=Homo sapiens OX=9606 GN=PARP1 PE=1 SV=4	0	40.837	9	7	15	7	113	8.88	45.84	20.295	PARP1
High	IsMasterProtein	Q8N806	Putative E3 ubiquitin-protein ligase UBR7 OS=Homo sapiens OX=9606 GN=UBR7 PE=1 SV=2	0	22.212	12	4	6	4	48	4.81	14.57	19.921	UBR7
High	IsMasterProtein	Q8N9T8	Protein KRI1 homolog OS=Homo sapiens OX=9606 GN=KRI1 PE=1 SV=3	0	39.356	12	5	9	5	82.5	5.14	31.54	19.803	KRI1
High	IsMasterProtein	P14406	Cytochrome c oxidase subunit 7A2, mitochondrial OS=Homo sapiens OX=9606 GN=COX7A2 PE=1 SV=1	0	10.321	28	2	6	2	9.4	9.76	15.49	19.569	COX7A2
High	IsMasterProtein	P40939	Trifunctional enzyme subunit alpha, mitochondrial OS=Homo sapiens OX=9606 GN=HADHA PE=1 SV=2	0	140.654	33	16	62	16	82.9	9.04	155.33	18.399	HADHA
High	IsMasterProtein	Q9NR31	GTP-binding protein SAR1a OS=Homo sapiens OX=9606 GN=SAR1A PE=1 SV=1	0	30.523	32	4	18	3	22.4	6.68	46.19	18.181	SAR1A
High	IsMasterProtein	P62841	40S ribosomal protein S15 OS=Homo sapiens OX=9606 GN=RPS15 PE=1 SV=2	0	159.456	50	5	173	5	17	10.39	497.66	18.109	RPS15
High	IsMasterProtein	P29084	Transcription initiation factor IIE subunit beta OS=Homo sapiens OX=9606 GN=GTF2E2 PE=1 SV=1	0	38.783	27	5	18	5	33	9.66	48.36	18.106	GTF2E2
High	IsMasterProtein	O00571	ATP-dependent RNA helicase DDX3X OS=Homo sapiens OX=9606 GN=DDX3X PE=1 SV=3	0	197.463	42	22	116	21	73.2	7.18	359.73	18.008	DDX3X
High	IsMasterProtein	P58107	Epiplakin OS=Homo sapiens OX=9606 GN=EPPK1 PE=1 SV=3	0	170.48	30	19	58	16	555.3	5.62	173.41	17.973
High	IsMasterProtein	Q9BQC3	2-(3-amino-3-carboxypropyl)histidine synthase subunit 2 OS=Homo sapiens OX=9606 GN=DPH2 PE=1 SV=1	0	18.32	13	3	13	3	52.1	5.53	12.57	17.831	DPH2
High	IsMasterProtein	P19387	DNA-directed RNA polymerase II subunit RPB3 OS=Homo sapiens OX=9606 GN=POLR2C PE=1 SV=2	0	16.986	14	3	8	3	31.4	4.92	21.17	17.81	POLR2C
High	IsMasterProtein	P04843	Dolichyl-diphosphooligosaccharide--protein glycosyltransferase subunit 1 OS=Homo sapiens OX=9606 GN=RPN1 PE=1 SV=1	0	75.018	26	12	28	12	68.5	6.38	93.45	17.199	RPN1
High	IsMasterProtein	P20073	Annexin A7 OS=Homo sapiens OX=9606 GN=ANXA7 PE=1 SV=3	0	19.81	8	3	7	3	52.7	5.68	21.02	17.149	ANXA7
High	IsMasterProtein	Q7L576	Cytoplasmic FMR1-interacting protein 1 OS=Homo sapiens OX=9606 GN=CYFIP1 PE=1 SV=1	0	27.458	5	5	13	5	145.1	6.9	35.35	16.881	CYFIP1
High	IsMasterProtein	Q9BV57	1,2-dihydroxy-3-keto-5-methylthiopentene dioxygenase OS=Homo sapiens OX=9606 GN=ADI1 PE=1 SV=1	0	13.808	19	3	9	3	21.5	5.68	25.08	16.777	ADI1
High	IsMasterProtein	Q9Y3U8	60S ribosomal protein L36 OS=Homo sapiens OX=9606 GN=RPL36 PE=1 SV=3	0	47.988	36	6	52	6	12.2	11.59	150.95	16.604	RPL36
High	IsMasterProtein	Q12965	Unconventional myosin-Ie OS=Homo sapiens OX=9606 GN=MYO1E PE=1 SV=2	0	59.3	12	10	24	10	127	8.92	64.1	16.455	MYO1E
High	IsMasterProtein	Q9BY42	Replication termination factor 2 OS=Homo sapiens OX=9606 GN=RTF2 PE=1 SV=3	0	10.337	10	3	6	3	33.9	8.59	16.89	16.426	RTFDC1
High	IsMasterProtein	P62891	60S ribosomal protein L39 OS=Homo sapiens OX=9606 GN=RPL39 PE=1 SV=2	0	9.333	24	2	7	2	6.4	12.56	21.77	16.206	RPL39; RPL39P3
High	IsMasterProtein	P56192	Methionine--tRNA ligase, cytoplasmic OS=Homo sapiens OX=9606 GN=MARS PE=1 SV=2	0	188.297	39	23	68	23	101.1	6.16	223.13	16.174	MARS
High	IsMasterProtein	Q99459	Cell division cycle 5-like protein OS=Homo sapiens OX=9606 GN=CDC5L PE=1 SV=2	0	262.804	54	31	92	31	92.2	8.18	333.86	15.983	CDC5L
High	IsMasterProtein	P23258	Tubulin gamma-1 chain OS=Homo sapiens OX=9606 GN=TUBG1 PE=1 SV=2	0	51.656	34	7	17	7	51.1	6.14	47.57	15.953	TUBG1
High	IsMasterProtein	Q92616	eIF-2-alpha kinase activator GCN1 OS=Homo sapiens OX=9606 GN=GCN1 PE=1 SV=6	0	180.969	15	25	72	25	292.6	7.47	149.3	15.793	GCN1L1; GCN1
High	IsMasterProtein	O00139	Kinesin-like protein KIF2A OS=Homo sapiens OX=9606 GN=KIF2A PE=1 SV=3	0	14.204	4	2	4	2	79.9	6.68	12.45	15.755	KIF2A
High	IsMasterProtein	P27797	Calreticulin OS=Homo sapiens OX=9606 GN=CALR PE=1 SV=1	0	145.504	47	13	63	13	48.1	4.44	206.31	15.75	CALR
High	IsMasterProtein	P24752	Acetyl-CoA acetyltransferase, mitochondrial OS=Homo sapiens OX=9606 GN=ACAT1 PE=1 SV=1	0	89.222	39	9	31	9	45.2	8.85	97.15	15.714	ACAT1
High	IsMasterProtein	P35249	Replication factor C subunit 4 OS=Homo sapiens OX=9606 GN=RFC4 PE=1 SV=2	0	71.931	30	7	19	7	39.7	8.02	61.24	15.657	RFC4
High	IsMasterProtein	Q99543	DnaJ homolog subfamily C member 2 OS=Homo sapiens OX=9606 GN=DNAJC2 PE=1 SV=4	0	79.766	26	13	40	13	72	8.7	112.89	15.605	DNAJC2
High	IsMasterProtein	O75844	CAAX prenyl protease 1 homolog OS=Homo sapiens OX=9606 GN=ZMPSTE24 PE=1 SV=2	0	25.537	9	3	12	3	54.8	7.49	27.64	15.573	ZMPSTE24
High	IsMasterProtein	Q9NW13	RNA-binding protein 28 OS=Homo sapiens OX=9606 GN=RBM28 PE=1 SV=3	0	52.657	14	8	21	8	85.7	9.22	73.12	15.42	RBM28
High	IsMasterProtein	Q96AG4	Leucine-rich repeat-containing protein 59 OS=Homo sapiens OX=9606 GN=LRRC59 PE=1 SV=1	0	46.455	27	6	32	6	34.9	9.57	97.65	15.364	LRRC59
High	IsMasterProtein	Q13642	Four and a half LIM domains protein 1 OS=Homo sapiens OX=9606 GN=FHL1 PE=1 SV=4	0	34.791	27	6	11	6	36.2	8.97	32.06	15.359	FHL1
High	IsMasterProtein	P08708	40S ribosomal protein S17 OS=Homo sapiens OX=9606 GN=RPS17 PE=1 SV=2	0	184.902	66	12	173	12	15.5	9.85	517.12	15.269	RPS17; RPS17L
High	IsMasterProtein	P33993	DNA replication licensing factor MCM7 OS=Homo sapiens OX=9606 GN=MCM7 PE=1 SV=4	0	181.189	46	24	79	24	81.3	6.46	244.87	15.266	MCM7
High	IsMasterProtein	Q96MU7	YTH domain-containing protein 1 OS=Homo sapiens OX=9606 GN=YTHDC1 PE=1 SV=3	0	8.304	6	2	4	2	84.6	6.23	9.51	15.185	YTHDC1
High	IsMasterProtein	O60678	Protein arginine N-methyltransferase 3 OS=Homo sapiens OX=9606 GN=PRMT3 PE=1 SV=4	0	25.326	12	4	10	4	59.9	5.35	26.36	15.09	PRMT3
High	IsMasterProtein	Q02241	Kinesin-like protein KIF23 OS=Homo sapiens OX=9606 GN=KIF23 PE=1 SV=3	0	15.193	4	2	6	2	110	8.51	22.36	15.022	KIF23
High	IsMasterProtein	Q9Y6E2	Basic leucine zipper and W2 domain-containing protein 2 OS=Homo sapiens OX=9606 GN=BZW2 PE=1 SV=1	0	47.871	19	7	20	4	48.1	6.68	44.14	15.02	BZW2
High	IsMasterProtein	P17844	Probable ATP-dependent RNA helicase DDX5 OS=Homo sapiens OX=9606 GN=DDX5 PE=1 SV=1	0	201.188	48	26	155	18	69.1	8.92	431.98	15.013	DDX5
High	IsMasterProtein	P46063	ATP-dependent DNA helicase Q1 OS=Homo sapiens OX=9606 GN=RECQL PE=1 SV=3	0	46.778	20	9	24	9	73.4	7.88	53.43	14.993	RECQL
High	IsMasterProtein	P08240	Signal recognition particle receptor subunit alpha OS=Homo sapiens OX=9606 GN=SRPRA PE=1 SV=2	0	16.286	6	3	8	3	69.8	8.95	16.31	14.935	SRPR; SRPRA
High	IsMasterProtein	O00264	Membrane-associated progesterone receptor component 1 OS=Homo sapiens OX=9606 GN=PGRMC1 PE=1 SV=3	0	28.485	28	4	11	3	21.7	4.7	36.57	14.909	PGRMC1
High	IsMasterProtein	O75934	Pre-mRNA-splicing factor SPF27 OS=Homo sapiens OX=9606 GN=BCAS2 PE=1 SV=1	0	47.379	36	6	16	6	26.1	5.66	51.38	14.82	BCAS2
High	IsMasterProtein	Q92879	CUGBP Elav-like family member 1 OS=Homo sapiens OX=9606 GN=CELF1 PE=1 SV=2	0	36.427	19	6	15	6	52	8.46	51.4	14.788	CELF1
High	IsMasterProtein	Q15796	Mothers against decapentaplegic homolog 2 OS=Homo sapiens OX=9606 GN=SMAD2 PE=1 SV=1	0	14.507	5	2	4	2	52.3	6.58	10.68	14.668	SMAD2
High	IsMasterProtein	P28340	DNA polymerase delta catalytic subunit OS=Homo sapiens OX=9606 GN=POLD1 PE=1 SV=2	0	90.089	19	14	33	14	123.6	7.03	89.99	14.667	POLD1
High	IsMasterProtein	P62829	60S ribosomal protein L23 OS=Homo sapiens OX=9606 GN=RPL23 PE=1 SV=1	0	107.153	68	12	114	12	14.9	10.51	348.67	14.445	RPL23
High	IsMasterProtein	P35232	Prohibitin OS=Homo sapiens OX=9606 GN=PHB PE=1 SV=1	0	43.303	32	6	19	6	29.8	5.76	56.81	14.382	PHB
High	IsMasterProtein	Q14166	Tubulin--tyrosine ligase-like protein 12 OS=Homo sapiens OX=9606 GN=TTLL12 PE=1 SV=2	0	69.393	27	10	25	10	74.4	5.53	86.15	14.371	TTLL12
High	IsMasterProtein	P56134	ATP synthase subunit f, mitochondrial OS=Homo sapiens OX=9606 GN=ATP5MF PE=1 SV=3	0	13.158	26	2	6	2	10.9	9.67	16.81	14.333	ATP5J2
High	IsMasterProtein	Q15527	Surfeit locus protein 2 OS=Homo sapiens OX=9606 GN=SURF2 PE=1 SV=3	0	51.379	41	6	19	6	29.6	9.22	62.49	14.226	SURF2
High	IsMasterProtein	Q9NQC3	Reticulon-4 OS=Homo sapiens OX=9606 GN=RTN4 PE=1 SV=2	0	43.848	7	3	15	3	129.9	4.5	52.87	14.127	RTN4
High	IsMasterProtein	Q5VYK3	Proteasome adapter and scaffold protein ECM29 OS=Homo sapiens OX=9606 GN=ECPAS PE=1 SV=2	0	100.901	11	14	35	14	204.2	7.12	67.28	14.081	KIAA0368
High	IsMasterProtein	P07814	Bifunctional glutamate/proline--tRNA ligase OS=Homo sapiens OX=9606 GN=EPRS PE=1 SV=5	0	465.252	54	60	218	60	170.5	7.33	680.05	14.075	EPRS
High	IsMasterProtein	Q9BUF5	Tubulin beta-6 chain OS=Homo sapiens OX=9606 GN=TUBB6 PE=1 SV=1	0	156.851	44	15	197	6	49.8	4.88	510.62	13.738	TUBB6
High	IsMasterProtein	Q15785	Mitochondrial import receptor subunit TOM34 OS=Homo sapiens OX=9606 GN=TOMM34 PE=1 SV=2	0	121.417	56	13	49	13	34.5	8.98	159.53	13.706	TOMM34
High	IsMasterProtein	Q96QC0	Serine/threonine-protein phosphatase 1 regulatory subunit 10 OS=Homo sapiens OX=9606 GN=PPP1R10 PE=1 SV=1	0	26.048	10	5	13	5	99	9.17	15.51	13.691	PPP1R10
High	IsMasterProtein	Q9P289	Serine/threonine-protein kinase 26 OS=Homo sapiens OX=9606 GN=STK26 PE=1 SV=2	0	32.572	15	5	15	2	46.5	5.29	38.67	13.662	MST4; STK26
High	IsMasterProtein	P45880	Voltage-dependent anion-selective channel protein 2 OS=Homo sapiens OX=9606 GN=VDAC2 PE=1 SV=2	0	71.876	44	9	33	9	31.5	7.56	103.05	13.653	VDAC2
High	IsMasterProtein	P50995	Annexin A11 OS=Homo sapiens OX=9606 GN=ANXA11 PE=1 SV=1	0	29.517	16	7	14	7	54.4	7.65	43.5	13.652	ANXA11
High	IsMasterProtein	Q9BZX2	Uridine-cytidine kinase 2 OS=Homo sapiens OX=9606 GN=UCK2 PE=1 SV=1	0	20.767	27	4	6	4	29.3	6.7	12.4	13.599	UCK2
High	IsMasterProtein	P62851	40S ribosomal protein S25 OS=Homo sapiens OX=9606 GN=RPS25 PE=1 SV=1	0	43.802	39	8	92	8	13.7	10.11	218.55	13.39	RPS25
High	IsMasterProtein	P42167	Lamina-associated polypeptide 2, isoforms beta/gamma OS=Homo sapiens OX=9606 GN=TMPO PE=1 SV=2	0	33.126	17	5	15	2	50.6	9.38	47.45	13.357	TMPO
High	IsMasterProtein	P46778	60S ribosomal protein L21 OS=Homo sapiens OX=9606 GN=RPL21 PE=1 SV=2	0	76.167	49	10	106	10	18.6	10.49	217.81	13.307	RPL21
High	IsMasterProtein	O43159	Ribosomal RNA-processing protein 8 OS=Homo sapiens OX=9606 GN=RRP8 PE=1 SV=2	0	23.139	10	3	8	3	50.7	9.42	27.8	13.245	RRP8
High	IsMasterProtein	Q9Y305	Acyl-coenzyme A thioesterase 9, mitochondrial OS=Homo sapiens OX=9606 GN=ACOT9 PE=1 SV=2	0	28.57	18	6	13	6	49.9	8.6	30.46	13.236	ACOT9
High	IsMasterProtein	Q9P2J5	Leucine--tRNA ligase, cytoplasmic OS=Homo sapiens OX=9606 GN=LARS PE=1 SV=2	0	210.277	33	28	82	28	134.4	7.3	253.62	13.211	LARS
High	IsMasterProtein	Q8IY81	pre-rRNA 2'-O-ribose RNA methyltransferase FTSJ3 OS=Homo sapiens OX=9606 GN=FTSJ3 PE=1 SV=2	0	117.191	25	14	44	14	96.5	8.4	133.49	13.209	FTSJ3
High	IsMasterProtein	O60701	UDP-glucose 6-dehydrogenase OS=Homo sapiens OX=9606 GN=UGDH PE=1 SV=1	0	63.742	30	10	25	10	55	7.12	66.96	13.179	UGDH
High	IsMasterProtein	Q07866	Kinesin light chain 1 OS=Homo sapiens OX=9606 GN=KLC1 PE=1 SV=2	0	23.293	6	2	7	2	65.3	6.2	19.77	13.161	KLC1
High	IsMasterProtein	P46776	60S ribosomal protein L27a OS=Homo sapiens OX=9606 GN=RPL27A PE=1 SV=2	0	66.91	33	8	71	8	16.6	11	178.97	13.14	RPL27A
High	IsMasterProtein	P10606	Cytochrome c oxidase subunit 5B, mitochondrial OS=Homo sapiens OX=9606 GN=COX5B PE=1 SV=2	0	5.963	16	2	6	2	13.7	8.81	14.21	13.136	COX5B
High	IsMasterProtein	Q9HCS7	Pre-mRNA-splicing factor SYF1 OS=Homo sapiens OX=9606 GN=XAB2 PE=1 SV=2	0	14.097	4	2	4	2	99.9	6.23	9.18	13.112	XAB2
High	IsMasterProtein	O75400	Pre-mRNA-processing factor 40 homolog A OS=Homo sapiens OX=9606 GN=PRPF40A PE=1 SV=2	0	129.353	19	17	54	17	108.7	7.56	148.92	13.111	PRPF40A
High	IsMasterProtein	P78527	DNA-dependent protein kinase catalytic subunit OS=Homo sapiens OX=9606 GN=PRKDC PE=1 SV=3	0	500.248	22	67	199	67	468.8	7.12	548.02	13.108	PRKDC
High	IsMasterProtein	P41252	Isoleucine--tRNA ligase, cytoplasmic OS=Homo sapiens OX=9606 GN=IARS PE=1 SV=2	0	188.865	29	26	67	26	144.4	6.15	200.6	12.834	IARS
High	IsMasterProtein	Q5JTH9	RRP12-like protein OS=Homo sapiens OX=9606 GN=RRP12 PE=1 SV=2	0	67.102	12	10	23	10	143.6	8.75	44.64	12.763	RRP12
High	IsMasterProtein	O75608	Acyl-protein thioesterase 1 OS=Homo sapiens OX=9606 GN=LYPLA1 PE=1 SV=1	0	7.729	11	2	5	2	24.7	6.77	8.81	12.737	LYPLA1
High	IsMasterProtein	Q9NUQ8	ATP-binding cassette sub-family F member 3 OS=Homo sapiens OX=9606 GN=ABCF3 PE=1 SV=2	0	33.334	10	5	11	5	79.7	6.34	30.91	12.611	ABCF3
High	IsMasterProtein	P14868	Aspartate--tRNA ligase, cytoplasmic OS=Homo sapiens OX=9606 GN=DARS PE=1 SV=2	0	124.507	49	20	62	20	57.1	6.55	171.08	12.525	DARS
High	IsMasterProtein	O95573	Long-chain-fatty-acid--CoA ligase 3 OS=Homo sapiens OX=9606 GN=ACSL3 PE=1 SV=3	0	37.875	12	6	11	5	80.4	8.38	23.6	12.524	ACSL3
High	IsMasterProtein	Q7Z2Z2	Elongation factor-like GTPase 1 OS=Homo sapiens OX=9606 GN=EFL1 PE=1 SV=2	0	34.122	5	4	17	4	125.4	5.91	36.74	12.522	EFTUD1; EFL1
High	IsMasterProtein	P40429	60S ribosomal protein L13a OS=Homo sapiens OX=9606 GN=RPL13A PE=1 SV=2	0	44.526	33	9	76	9	23.6	10.93	159.04	12.332	RPL13A
High	IsMasterProtein	Q13155	Aminoacyl tRNA synthase complex-interacting multifunctional protein 2 OS=Homo sapiens OX=9606 GN=AIMP2 PE=1 SV=2	0	48.338	32	6	21	6	35.3	8.22	61.57	12.219	AIMP2
High	IsMasterProtein	Q7Z4Q2	HEAT repeat-containing protein 3 OS=Homo sapiens OX=9606 GN=HEATR3 PE=1 SV=2	0	22.416	9	4	9	4	74.5	5.11	16.19	12.164	HEATR3
High	IsMasterProtein	O75964	ATP synthase subunit g, mitochondrial OS=Homo sapiens OX=9606 GN=ATP5MG PE=1 SV=3	0	12.666	27	2	2	2	11.4	9.64	6.88	12.118	ATP5L
High	IsMasterProtein	Q99798	Aconitate hydratase, mitochondrial OS=Homo sapiens OX=9606 GN=ACO2 PE=1 SV=2	0	35.454	12	5	10	5	85.4	7.61	26.65	12.078	ACO2
High	IsMasterProtein	P61513	60S ribosomal protein L37a OS=Homo sapiens OX=9606 GN=RPL37A PE=1 SV=2	0	38.776	51	5	45	5	10.3	10.43	134.14	12.074	RPL37A
High	IsMasterProtein	P18124	60S ribosomal protein L7 OS=Homo sapiens OX=9606 GN=RPL7 PE=1 SV=1	0	213.442	63	23	198	23	29.2	10.65	534.63	12.023	RPL7
High	IsMasterProtein	P18754	Regulator of chromosome condensation OS=Homo sapiens OX=9606 GN=RCC1 PE=1 SV=1	0	119.557	48	13	37	13	44.9	7.52	128.01	12.02	RCC1
High	IsMasterProtein	Q16513	Serine/threonine-protein kinase N2 OS=Homo sapiens OX=9606 GN=PKN2 PE=1 SV=1	0	12.562	4	3	3	3	112	6.3	4.74	11.948	PKN2
High	IsMasterProtein	Q8NB16	Mixed lineage kinase domain-like protein OS=Homo sapiens OX=9606 GN=MLKL PE=1 SV=1	0	23.011	15	4	8	4	54.4	8.82	25.04	11.882	MLKL
High	IsMasterProtein	P33992	DNA replication licensing factor MCM5 OS=Homo sapiens OX=9606 GN=MCM5 PE=1 SV=5	0	137.421	40	22	59	22	82.2	8.37	179.09	11.869	MCM5
High	IsMasterProtein	Q5VT52	Regulation of nuclear pre-mRNA domain-containing protein 2 OS=Homo sapiens OX=9606 GN=RPRD2 PE=1 SV=1	0	27.712	4	4	13	4	155.9	7.42	29.88	11.759	RPRD2
High	IsMasterProtein	P49755	Transmembrane emp24 domain-containing protein 10 OS=Homo sapiens OX=9606 GN=TMED10 PE=1 SV=2	0	43.628	22	4	21	4	25	7.44	80.78	11.724	TMED10
High	IsMasterProtein	Q7L014	Probable ATP-dependent RNA helicase DDX46 OS=Homo sapiens OX=9606 GN=DDX46 PE=1 SV=2	0	126.794	29	25	61	25	117.3	9.29	162.8	11.699	DDX46
High	IsMasterProtein	Q13123	Protein Red OS=Homo sapiens OX=9606 GN=IK PE=1 SV=3	0	50.698	19	8	26	8	65.6	6.64	69.36	11.669	IK
High	IsMasterProtein	Q9BQ69	ADP-ribose glycohydrolase MACROD1 OS=Homo sapiens OX=9606 GN=MACROD1 PE=1 SV=2	0	41.014	26	5	14	5	35.5	9.51	53.74	11.661	MACROD1
High	IsMasterProtein	Q15397	Pumilio homolog 3 OS=Homo sapiens OX=9606 GN=PUM3 PE=1 SV=3	0	64.974	21	10	27	10	73.5	9.64	61.09	11.66	KIAA0020; PUM3
High	IsMasterProtein	P51571	Translocon-associated protein subunit delta OS=Homo sapiens OX=9606 GN=SSR4 PE=1 SV=1	0	22.516	31	4	13	4	19	6.15	42.29	11.643	SSR4
High	IsMasterProtein	P49257	Protein ERGIC-53 OS=Homo sapiens OX=9606 GN=LMAN1 PE=1 SV=2	0	55.452	24	7	22	7	57.5	6.77	82.34	11.545	LMAN1
High	IsMasterProtein	Q15020	Squamous cell carcinoma antigen recognized by T-cells 3 OS=Homo sapiens OX=9606 GN=SART3 PE=1 SV=1	0	77.056	20	12	27	12	109.9	5.57	87.15	11.531	SART3
High	IsMasterProtein	Q9UG63	ATP-binding cassette sub-family F member 2 OS=Homo sapiens OX=9606 GN=ABCF2 PE=1 SV=2	0	58.615	22	11	25	11	71.2	7.37	75.11	11.517	ABCF2
High	IsMasterProtein	P62820	Ras-related protein Rab-1A OS=Homo sapiens OX=9606 GN=RAB1A PE=1 SV=3	0	31.383	31	4	22	1	22.7	6.21	56.13	11.505	RAB1A
High	IsMasterProtein	Q92841	Probable ATP-dependent RNA helicase DDX17 OS=Homo sapiens OX=9606 GN=DDX17 PE=1 SV=2	0	194.434	46	29	137	21	80.2	8.27	383.07	11.489	DDX17
High	IsMasterProtein	Q14558	Phosphoribosyl pyrophosphate synthase-associated protein 1 OS=Homo sapiens OX=9606 GN=PRPSAP1 PE=1 SV=2	0	20.62	14	3	6	3	39.4	7.2	18.78	11.484	PRPSAP1
High	IsMasterProtein	Q9Y285	Phenylalanine--tRNA ligase alpha subunit OS=Homo sapiens OX=9606 GN=FARSA PE=1 SV=3	0	77.715	21	7	25	7	57.5	7.8	91.06	11.481	FARSA
High	IsMasterProtein	Q15363	Transmembrane emp24 domain-containing protein 2 OS=Homo sapiens OX=9606 GN=TMED2 PE=1 SV=1	0	19.227	18	2	10	2	22.7	5.17	15.61	11.449	TMED2
High	IsMasterProtein	Q14258	E3 ubiquitin/ISG15 ligase TRIM25 OS=Homo sapiens OX=9606 GN=TRIM25 PE=1 SV=2	0	128.406	32	16	56	16	70.9	8.09	162.94	11.414	TRIM25
High	IsMasterProtein	P51572	B-cell receptor-associated protein 31 OS=Homo sapiens OX=9606 GN=BCAP31 PE=1 SV=3	0	13.119	17	5	9	5	28	8.44	18.37	11.379	BCAP31
High	IsMasterProtein	P05141	ADP/ATP translocase 2 OS=Homo sapiens OX=9606 GN=SLC25A5 PE=1 SV=7	0	62.166	39	11	52	3	32.8	9.69	118.13	11.362	SLC25A5
High	IsMasterProtein	O15160	DNA-directed RNA polymerases I and III subunit RPAC1 OS=Homo sapiens OX=9606 GN=POLR1C PE=1 SV=1	0	32.12	13	3	15	3	39.2	5.5	46.22	11.337	POLR1C
High	IsMasterProtein	P53621	Coatomer subunit alpha OS=Homo sapiens OX=9606 GN=COPA PE=1 SV=2	0	77.534	12	11	32	11	138.3	7.66	81.13	11.332	COPA
High	IsMasterProtein	Q9BTD8	RNA-binding protein 42 OS=Homo sapiens OX=9606 GN=RBM42 PE=1 SV=1	0	41.035	16	7	22	7	50.4	9.63	45.22	11.299	RBM42
High	IsMasterProtein	O75396	Vesicle-trafficking protein SEC22b OS=Homo sapiens OX=9606 GN=SEC22B PE=1 SV=4	0	30.662	26	4	10	4	24.6	6.92	37.02	11.298	SEC22B
High	IsMasterProtein	Q15003	Condensin complex subunit 2 OS=Homo sapiens OX=9606 GN=NCAPH PE=1 SV=3	0	51.564	18	8	23	8	82.5	5.06	38.91	11.296	NCAPH
High	IsMasterProtein	Q00325	Phosphate carrier protein, mitochondrial OS=Homo sapiens OX=9606 GN=SLC25A3 PE=1 SV=2	0	21.291	14	5	12	5	40.1	9.38	25.87	11.295	SLC25A3
High	IsMasterProtein	O00159	Unconventional myosin-Ic OS=Homo sapiens OX=9606 GN=MYO1C PE=1 SV=4	0	6.554	3	2	4	2	121.6	9.41	0	11.292	MYO1C
High	IsMasterProtein	Q9UNQ2	Probable dimethyladenosine transferase OS=Homo sapiens OX=9606 GN=DIMT1 PE=1 SV=1	0	16.374	14	4	8	4	35.2	9.99	15.78	11.257	DIMT1
High	IsMasterProtein	P00387	NADH-cytochrome b5 reductase 3 OS=Homo sapiens OX=9606 GN=CYB5R3 PE=1 SV=3	0	26.406	16	3	7	3	34.2	7.59	21.68	11.243	CYB5R3
High	IsMasterProtein	P51153	Ras-related protein Rab-13 OS=Homo sapiens OX=9606 GN=RAB13 PE=1 SV=1	0	7.204	9	2	4	1	22.8	9.19	6.8	11.212	RAB13
High	IsMasterProtein	P52701	DNA mismatch repair protein Msh6 OS=Homo sapiens OX=9606 GN=MSH6 PE=1 SV=2	0	131.376	20	20	62	20	152.7	6.9	169.74	11.189	MSH6
High	IsMasterProtein	O43395	U4/U6 small nuclear ribonucleoprotein Prp3 OS=Homo sapiens OX=9606 GN=PRPF3 PE=1 SV=2	0	97.511	28	13	33	13	77.5	9.5	104.55	11.169	PRPF3
High	IsMasterProtein	Q9BYG3	MKI67 FHA domain-interacting nucleolar phosphoprotein OS=Homo sapiens OX=9606 GN=NIFK PE=1 SV=1	0	41.982	28	7	21	7	34.2	9.88	51.56	11.147	MKI67IP; NIFK
High	IsMasterProtein	P48059	LIM and senescent cell antigen-like-containing domain protein 1 OS=Homo sapiens OX=9606 GN=LIMS1 PE=1 SV=4	0	9.256	9	3	5	3	37.2	8.05	7.8	11.14	LIMS1
High	IsMasterProtein	Q01780	Exosome component 10 OS=Homo sapiens OX=9606 GN=EXOSC10 PE=1 SV=2	0	51.569	17	10	22	10	100.8	8.46	56.23	11.117	EXOSC10
High	IsMasterProtein	P25325	3-mercaptopyruvate sulfurtransferase OS=Homo sapiens OX=9606 GN=MPST PE=1 SV=3	0	21.859	18	3	9	3	33.2	6.6	27.03	11.028	MPST
High	IsMasterProtein	P62910	60S ribosomal protein L32 OS=Homo sapiens OX=9606 GN=RPL32 PE=1 SV=2	0	86.183	47	11	82	11	15.9	11.33	213.08	11	RPL32
High	IsMasterProtein	Q06124	Tyrosine-protein phosphatase non-receptor type 11 OS=Homo sapiens OX=9606 GN=PTPN11 PE=1 SV=2	0	51.769	19	7	16	7	68.4	7.3	45.77	10.995	PTPN11
High	IsMasterProtein	O75694	Nuclear pore complex protein Nup155 OS=Homo sapiens OX=9606 GN=NUP155 PE=1 SV=1	0	29.127	7	6	12	6	155.1	6.16	28.84	10.991	NUP155
High	IsMasterProtein	Q14432	cGMP-inhibited 3',5'-cyclic phosphodiesterase A OS=Homo sapiens OX=9606 GN=PDE3A PE=1 SV=3	0	17.399	6	3	6	3	124.9	6	13.09	10.946	PDE3A
High	IsMasterProtein	Q96RP9	Elongation factor G, mitochondrial OS=Homo sapiens OX=9606 GN=GFM1 PE=1 SV=2	0	36.781	8	5	12	5	83.4	7.01	34.17	10.944	GFM1
High	IsMasterProtein	O43776	Asparagine--tRNA ligase, cytoplasmic OS=Homo sapiens OX=9606 GN=NARS1 PE=1 SV=1	0	101.881	27	12	59	12	62.9	6.25	161.54	10.942	NARS
High	IsMasterProtein	Q9BQG0	Myb-binding protein 1A OS=Homo sapiens OX=9606 GN=MYBBP1A PE=1 SV=2	0	53.699	10	10	26	10	148.8	9.28	58.92	10.924	MYBBP1A
High	IsMasterProtein	P51553	Isocitrate dehydrogenase [NAD] subunit gamma, mitochondrial OS=Homo sapiens OX=9606 GN=IDH3G PE=1 SV=1	0	24.676	19	4	9	4	42.8	8.5	28.55	10.865	IDH3G
High	IsMasterProtein	Q9Y6B6	GTP-binding protein SAR1b OS=Homo sapiens OX=9606 GN=SAR1B PE=1 SV=1	0	10.063	22	3	8	2	22.4	6.11	8.77	10.861	SAR1B
High	IsMasterProtein	P47897	Glutamine--tRNA ligase OS=Homo sapiens OX=9606 GN=QARS PE=1 SV=1	0	184.37	36	22	76	22	87.7	7.15	229.36	10.835	QARS
High	IsMasterProtein	O15173	Membrane-associated progesterone receptor component 2 OS=Homo sapiens OX=9606 GN=PGRMC2 PE=1 SV=1	0	10.755	10	2	5	1	23.8	4.88	12.73	10.833	PGRMC2
High	IsMasterProtein	P54136	Arginine--tRNA ligase, cytoplasmic OS=Homo sapiens OX=9606 GN=RARS PE=1 SV=2	0	151.831	42	22	65	22	75.3	6.68	173.07	10.813	RARS
High	IsMasterProtein	P27824	Calnexin OS=Homo sapiens OX=9606 GN=CANX PE=1 SV=2	0	96.341	22	15	80	15	67.5	4.6	189.87	10.776	CANX
High	IsMasterProtein	O75643	U5 small nuclear ribonucleoprotein 200 kDa helicase OS=Homo sapiens OX=9606 GN=SNRNP200 PE=1 SV=2	0	404.643	33	48	152	48	244.4	6.06	443.61	10.699	SNRNP200
High	IsMasterProtein	Q9NYF8	Bcl-2-associated transcription factor 1 OS=Homo sapiens OX=9606 GN=BCLAF1 PE=1 SV=2	0	45.8	10	7	32	7	106.1	9.98	71.6	10.689	BCLAF1
High	IsMasterProtein	Q92597	Protein NDRG1 OS=Homo sapiens OX=9606 GN=NDRG1 PE=1 SV=1	0	62.096	21	5	20	5	42.8	5.82	83.11	10.666	NDRG1
High	IsMasterProtein	Q9NR30	Nucleolar RNA helicase 2 OS=Homo sapiens OX=9606 GN=DDX21 PE=1 SV=5	0	471.622	57	43	238	41	87.3	9.28	802.09	10.625	DDX21
High	IsMasterProtein	Q9BXJ9	N-alpha-acetyltransferase 15, NatA auxiliary subunit OS=Homo sapiens OX=9606 GN=NAA15 PE=1 SV=1	0	132.198	33	24	70	24	101.2	7.42	173.72	10.606	NAA15
High	IsMasterProtein	Q9Y2L1	Exosome complex exonuclease RRP44 OS=Homo sapiens OX=9606 GN=DIS3 PE=1 SV=2	0	68.89	14	10	28	10	108.9	7.14	75.99	10.579	DIS3
High	IsMasterProtein	P0DMN0	Sulfotransferase 1A4 OS=Homo sapiens OX=9606 GN=SULT1A4 PE=1 SV=1	0	71.898	47	10	37	10	34.2	6.01	112.61	10.572	SULT1A4; LOC101929857; LOC101060714; SULT1A3; SLX1A-SULT1A3; LOC105369243
High	IsMasterProtein	Q92979	Ribosomal RNA small subunit methyltransferase NEP1 OS=Homo sapiens OX=9606 GN=EMG1 PE=1 SV=4	0	20.921	25	4	9	4	26.7	9.17	18.6	10.548	EMG1
High	IsMasterProtein	Q9BUL8	Programmed cell death protein 10 OS=Homo sapiens OX=9606 GN=PDCD10 PE=1 SV=1	0	10.406	16	2	4	2	24.7	8.19	11.67	10.391	PDCD10
High	IsMasterProtein	O95232	Luc7-like protein 3 OS=Homo sapiens OX=9606 GN=LUC7L3 PE=1 SV=2	0	82.026	28	11	35	11	51.4	9.79	86.8	10.385	LUC7L3
High	IsMasterProtein	Q16637	Survival motor neuron protein OS=Homo sapiens OX=9606 GN=SMN1 PE=1 SV=1	0	21.287	16	3	8	3	31.8	6.55	23.93	10.375	SMN1; SMN2
High	IsMasterProtein	O14975	Very long-chain acyl-CoA synthetase OS=Homo sapiens OX=9606 GN=SLC27A2 PE=1 SV=2	0	52.003	17	8	32	8	70.3	8.51	44.82	10.369	SLC27A2
High	IsMasterProtein	Q9NR56	Muscleblind-like protein 1 OS=Homo sapiens OX=9606 GN=MBNL1 PE=1 SV=2	0	6.657	5	2	4	2	41.8	8.9	9.86	10.326	MBNL1
High	IsMasterProtein	P50213	Isocitrate dehydrogenase [NAD] subunit alpha, mitochondrial OS=Homo sapiens OX=9606 GN=IDH3A PE=1 SV=1	0	44.691	26	7	19	7	39.6	6.92	47.87	10.301	IDH3A
High	IsMasterProtein	P31327	Carbamoyl-phosphate synthase [ammonia], mitochondrial OS=Homo sapiens OX=9606 GN=CPS1 PE=1 SV=2	0	664.149	61	69	396	66	164.8	6.74	1185.67	10.249	CPS1
High	IsMasterProtein	Q92499	ATP-dependent RNA helicase DDX1 OS=Homo sapiens OX=9606 GN=DDX1 PE=1 SV=2	0	149.659	35	21	75	21	82.4	7.23	172.03	10.216	DDX1
High	IsMasterProtein	Q13823	Nucleolar GTP-binding protein 2 OS=Homo sapiens OX=9606 GN=GNL2 PE=1 SV=1	0	35.438	10	6	11	6	83.6	9.25	37.06	10.205	GNL2
High	IsMasterProtein	P49327	Fatty acid synthase OS=Homo sapiens OX=9606 GN=FASN PE=1 SV=3	0	714.874	44	75	308	75	273.3	6.44	929.33	10.184	FASN
High	IsMasterProtein	P43897	Elongation factor Ts, mitochondrial OS=Homo sapiens OX=9606 GN=TSFM PE=1 SV=2	0	43.194	36	7	14	7	35.4	8.38	34.1	10.182	TSFM
High	IsMasterProtein	P68371	Tubulin beta-4B chain OS=Homo sapiens OX=9606 GN=TUBB4B PE=1 SV=1	0	488.89	73	28	534	3	49.8	4.89	1628.69	10.148	TUBB4B
High	IsMasterProtein	Q9C0B1	Alpha-ketoglutarate-dependent dioxygenase FTO OS=Homo sapiens OX=9606 GN=FTO PE=1 SV=3	0	11.584	7	2	7	2	58.2	5.22	5.83	10.127	FTO
High	IsMasterProtein	Q9H2U1	ATP-dependent DNA/RNA helicase DHX36 OS=Homo sapiens OX=9606 GN=DHX36 PE=1 SV=2	0	30.767	7	5	11	4	114.7	7.68	30.96	10.091	DHX36
High	IsMasterProtein	P10768	S-formylglutathione hydrolase OS=Homo sapiens OX=9606 GN=ESD PE=1 SV=2	0	60.025	40	7	34	7	31.4	7.02	100.52	10.073	ESD
High	IsMasterProtein	Q9Y383	Putative RNA-binding protein Luc7-like 2 OS=Homo sapiens OX=9606 GN=LUC7L2 PE=1 SV=2	0	122.823	40	16	82	11	46.5	10.01	247.87	10.054	LUC7L2
High	IsMasterProtein	O43324	Eukaryotic translation elongation factor 1 epsilon-1 OS=Homo sapiens OX=9606 GN=EEF1E1 PE=1 SV=1	0	12.102	20	2	9	2	19.8	8.54	26.27	10.031	EEF1E1
High	IsMasterProtein	P68133	Actin, alpha skeletal muscle OS=Homo sapiens OX=9606 GN=ACTA1 PE=1 SV=1	0	199.971	33	17	664	2	42	5.39	1173.48	9.997	ACTA1
High	IsMasterProtein	Q8WUM0	Nuclear pore complex protein Nup133 OS=Homo sapiens OX=9606 GN=NUP133 PE=1 SV=2	0	20.169	5	3	6	3	128.9	5.1	20.15	9.981	NUP133
High	IsMasterProtein	Q13085	Acetyl-CoA carboxylase 1 OS=Homo sapiens OX=9606 GN=ACACA PE=1 SV=2	0	12.356	1	2	3	2	265.4	6.37	9.15	9.975	ACACA
High	IsMasterProtein	Q9Y315	Deoxyribose-phosphate aldolase OS=Homo sapiens OX=9606 GN=DERA PE=1 SV=2	0	11.532	7	2	2	2	35.2	8.94	5.95	9.921	DERA
High	IsMasterProtein	P68366	Tubulin alpha-4A chain OS=Homo sapiens OX=9606 GN=TUBA4A PE=1 SV=1	0	332.221	58	22	325	5	49.9	5.06	953.01	9.915	TUBA4A
High	IsMasterProtein	P11177	Pyruvate dehydrogenase E1 component subunit beta, mitochondrial OS=Homo sapiens OX=9606 GN=PDHB PE=1 SV=3	0	53.429	37	9	36	9	39.2	6.65	82.6	9.874	PDHB
High	IsMasterProtein	Q9H4M9	EH domain-containing protein 1 OS=Homo sapiens OX=9606 GN=EHD1 PE=1 SV=2	0	76.483	37	12	27	12	60.6	6.83	75.05	9.873	EHD1
High	IsMasterProtein	Q9NW64	Pre-mRNA-splicing factor RBM22 OS=Homo sapiens OX=9606 GN=RBM22 PE=1 SV=1	0	23.564	12	3	5	3	46.9	8.54	13.41	9.861	RBM22
High	IsMasterProtein	P39656	Dolichyl-diphosphooligosaccharide--protein glycosyltransferase 48 kDa subunit OS=Homo sapiens OX=9606 GN=DDOST PE=1 SV=4	0	27.724	22	5	11	5	50.8	6.55	17.17	9.858	DDOST
High	IsMasterProtein	Q9H0U4	Ras-related protein Rab-1B OS=Homo sapiens OX=9606 GN=RAB1B PE=1 SV=1	0	55.774	44	6	37	3	22.2	5.73	107.82	9.84	RAB1B
High	IsMasterProtein	A6NHR9	Structural maintenance of chromosomes flexible hinge domain-containing protein 1 OS=Homo sapiens OX=9606 GN=SMCHD1 PE=1 SV=2	0	11.498	2	3	4	3	226.2	7.3	8.89	9.83	SMCHD1
High	IsMasterProtein	Q9Y606	tRNA pseudouridine synthase A OS=Homo sapiens OX=9606 GN=PUS1 PE=1 SV=3	0	11.551	5	2	6	2	47.4	8.41	14.22	9.822	PUS1
High	IsMasterProtein	Q14257	Reticulocalbin-2 OS=Homo sapiens OX=9606 GN=RCN2 PE=1 SV=1	0	27.643	17	3	8	3	36.9	4.4	22.91	9.79	RCN2
High	IsMasterProtein	Q13045	Protein flightless-1 homolog OS=Homo sapiens OX=9606 GN=FLII PE=1 SV=2	0	53.54	9	8	19	8	144.7	6.05	56.84	9.735	FLII
High	IsMasterProtein	Q96S44	EKC/KEOPS complex subunit TP53RK OS=Homo sapiens OX=9606 GN=TP53RK PE=1 SV=2	0	23.939	19	3	9	3	28.1	9.54	20.18	9.704	TP53RK
High	IsMasterProtein	P41743	Protein kinase C iota type OS=Homo sapiens OX=9606 GN=PRKCI PE=1 SV=2	0	26.587	9	3	8	3	68.2	5.85	28.05	9.684	PRKCI
High	IsMasterProtein	Q01081	Splicing factor U2AF 35 kDa subunit OS=Homo sapiens OX=9606 GN=U2AF1 PE=1 SV=3	0	83.083	44	7	34	7	27.9	8.81	119.36	9.664	U2AF1; LOC102724594; U2AF1L5
High	IsMasterProtein	Q96QK1	Vacuolar protein sorting-associated protein 35 OS=Homo sapiens OX=9606 GN=VPS35 PE=1 SV=2	0	104.518	27	15	47	15	91.6	5.49	117.45	9.642	VPS35
High	IsMasterProtein	P11586	C-1-tetrahydrofolate synthase, cytoplasmic OS=Homo sapiens OX=9606 GN=MTHFD1 PE=1 SV=3	0	228.131	44	32	124	32	101.5	7.3	350.8	9.628	MTHFD1
High	IsMasterProtein	P30520	Adenylosuccinate synthetase isozyme 2 OS=Homo sapiens OX=9606 GN=ADSS2 PE=1 SV=3	0	73.065	25	9	19	9	50.1	6.55	61.95	9.624	ADSS
High	IsMasterProtein	P61353	60S ribosomal protein L27 OS=Homo sapiens OX=9606 GN=RPL27 PE=1 SV=2	0	106.351	49	8	106	8	15.8	10.56	284.59	9.613	RPL27
High	IsMasterProtein	Q9BWF3	RNA-binding protein 4 OS=Homo sapiens OX=9606 GN=RBM4 PE=1 SV=1	0	73.015	32	7	22	7	40.3	7.08	91.76	9.577	RBM4
High	IsMasterProtein	Q9Y678	Coatomer subunit gamma-1 OS=Homo sapiens OX=9606 GN=COPG1 PE=1 SV=1	0	116.903	30	16	68	15	97.7	5.47	124.42	9.566	COPG1
High	IsMasterProtein	O95347	Structural maintenance of chromosomes protein 2 OS=Homo sapiens OX=9606 GN=SMC2 PE=1 SV=2	0	154.06	26	24	62	24	135.6	8.43	177.18	9.541	SMC2
High	IsMasterProtein	Q9BVK6	Transmembrane emp24 domain-containing protein 9 OS=Homo sapiens OX=9606 GN=TMED9 PE=1 SV=2	0	9.475	9	2	5	2	27.3	8.02	15.91	9.535	TMED9
High	IsMasterProtein	P63167	Dynein light chain 1, cytoplasmic OS=Homo sapiens OX=9606 GN=DYNLL1 PE=1 SV=1	0	35.352	45	3	19	3	10.4	7.4	53.05	9.45	DYNLL1
High	IsMasterProtein	Q5RKV6	Exosome complex component MTR3 OS=Homo sapiens OX=9606 GN=EXOSC6 PE=1 SV=1	0	27.513	22	3	6	3	28.2	6.28	22.95	9.433	EXOSC6
High	IsMasterProtein	Q9BUQ8	Probable ATP-dependent RNA helicase DDX23 OS=Homo sapiens OX=9606 GN=DDX23 PE=1 SV=3	0	142.254	34	23	68	23	95.5	9.55	180.14	9.394	DDX23
High	IsMasterProtein	P83731	60S ribosomal protein L24 OS=Homo sapiens OX=9606 GN=RPL24 PE=1 SV=1	0	46.303	37	7	53	7	17.8	11.25	135.08	9.376	RPL24
High	IsMasterProtein	P55265	Double-stranded RNA-specific adenosine deaminase OS=Homo sapiens OX=9606 GN=ADAR PE=1 SV=4	0	129.985	23	19	49	19	136	8.65	141.25	9.366	ADAR
High	IsMasterProtein	P40938	Replication factor C subunit 3 OS=Homo sapiens OX=9606 GN=RFC3 PE=1 SV=2	0	20.692	8	2	4	2	40.5	8.34	17.59	9.346	RFC3
High	IsMasterProtein	Q8N1F7	Nuclear pore complex protein Nup93 OS=Homo sapiens OX=9606 GN=NUP93 PE=1 SV=2	0	62.623	18	10	22	10	93.4	5.72	70.14	9.333	NUP93
High	IsMasterProtein	P21796	Voltage-dependent anion-selective channel protein 1 OS=Homo sapiens OX=9606 GN=VDAC1 PE=1 SV=2	0	56.086	39	8	28	8	30.8	8.54	61.73	9.328	VDAC1
High	IsMasterProtein	P07099	Epoxide hydrolase 1 OS=Homo sapiens OX=9606 GN=EPHX1 PE=1 SV=1	0	11.569	8	2	5	2	52.9	7.25	13.03	9.321	EPHX1
High	IsMasterProtein	P33991	DNA replication licensing factor MCM4 OS=Homo sapiens OX=9606 GN=MCM4 PE=1 SV=5	0	161.95	34	23	59	23	96.5	6.74	189.37	9.275	MCM4
High	IsMasterProtein	P57737	Coronin-7 OS=Homo sapiens OX=9606 GN=CORO7 PE=1 SV=2	0	13.082	6	3	4	3	100.5	5.8	4.14	9.271	CORO7
High	IsMasterProtein	P52292	Importin subunit alpha-1 OS=Homo sapiens OX=9606 GN=KPNA2 PE=1 SV=1	0	69.603	28	11	31	11	57.8	5.4	78.26	9.269	KPNA2
High	IsMasterProtein	Q16186	Proteasomal ubiquitin receptor ADRM1 OS=Homo sapiens OX=9606 GN=ADRM1 PE=1 SV=2	0	14.866	8	3	9	3	42.1	5.07	8.58	9.259	ADRM1
High	IsMasterProtein	Q9UGI8	Testin OS=Homo sapiens OX=9606 GN=TES PE=1 SV=1	0	23.794	15	5	10	5	48	7.68	24.98	9.255	TES
High	IsMasterProtein	Q9Y3B4	Splicing factor 3B subunit 6 OS=Homo sapiens OX=9606 GN=SF3B6 PE=1 SV=1	0	19.571	21	2	8	2	14.6	9.38	26.81	9.22	SF3B14; SF3B6
High	IsMasterProtein	Q7KZF4	Staphylococcal nuclease domain-containing protein 1 OS=Homo sapiens OX=9606 GN=SND1 PE=1 SV=1	0	213.495	39	22	70	22	101.9	7.17	230.46	9.215	SND1
High	IsMasterProtein	Q9P0L0	Vesicle-associated membrane protein-associated protein A OS=Homo sapiens OX=9606 GN=VAPA PE=1 SV=3	0	42.009	35	6	25	6	27.9	8.62	67.66	9.175	VAPA
High	IsMasterProtein	Q9UHB9	Signal recognition particle subunit SRP68 OS=Homo sapiens OX=9606 GN=SRP68 PE=1 SV=2	0	47.47	11	4	15	4	70.7	8.56	52.44	9.158	SRP68
High	IsMasterProtein	P16435	NADPH--cytochrome P450 reductase OS=Homo sapiens OX=9606 GN=POR PE=1 SV=2	0	58.878	18	8	19	8	76.6	5.58	45.4	9.148	POR
High	IsMasterProtein	P21291	Cysteine and glycine-rich protein 1 OS=Homo sapiens OX=9606 GN=CSRP1 PE=1 SV=3	0	130.245	54	7	49	7	20.6	8.57	190.71	9.099	CSRP1
High	IsMasterProtein	Q00796	Sorbitol dehydrogenase OS=Homo sapiens OX=9606 GN=SORD PE=1 SV=4	0	136.606	51	12	62	12	38.3	7.97	208.96	9.082	SORD
High	IsMasterProtein	O75351	Vacuolar protein sorting-associated protein 4B OS=Homo sapiens OX=9606 GN=VPS4B PE=1 SV=2	0	19.108	19	4	6	4	49.3	7.23	8.06	9.074	VPS4B
High	IsMasterProtein	Q14980	Nuclear mitotic apparatus protein 1 OS=Homo sapiens OX=9606 GN=NUMA1 PE=1 SV=2	0	133.362	12	16	40	16	238.1	5.78	128.16	9.068	NUMA1
High	IsMasterProtein	Q12788	Transducin beta-like protein 3 OS=Homo sapiens OX=9606 GN=TBL3 PE=1 SV=2	0	8.44	4	2	4	2	89	6.9	7.68	9.05	TBL3
High	IsMasterProtein	P11766	Alcohol dehydrogenase class-3 OS=Homo sapiens OX=9606 GN=ADH5 PE=1 SV=4	0	56.998	27	8	27	8	39.7	7.49	61.36	9.048	ADH5
High	IsMasterProtein	Q9P2N5	RNA-binding protein 27 OS=Homo sapiens OX=9606 GN=RBM27 PE=1 SV=2	0	19.006	4	3	9	2	118.6	9.19	8.39	9.042	RBM27
High	IsMasterProtein	P19784	Casein kinase II subunit alpha' OS=Homo sapiens OX=9606 GN=CSNK2A2 PE=1 SV=1	0	127.337	48	14	55	14	41.2	8.56	177.49	9.017	CSNK2A2
High	IsMasterProtein	P51570	Galactokinase OS=Homo sapiens OX=9606 GN=GALK1 PE=1 SV=1	0	13.927	10	2	4	2	42.2	6.46	12.3	9.016	GALK1
High	IsMasterProtein	Q13523	Serine/threonine-protein kinase PRP4 homolog OS=Homo sapiens OX=9606 GN=PRPF4B PE=1 SV=3	0	125.085	17	15	61	15	116.9	10.26	144.21	9.013	PRPF4B
High	IsMasterProtein	Q13057	Bifunctional coenzyme A synthase OS=Homo sapiens OX=9606 GN=COASY PE=1 SV=4	0	71.099	37	10	28	10	62.3	6.99	81.34	9.003	COASY
High	IsMasterProtein	Q15084	Protein disulfide-isomerase A6 OS=Homo sapiens OX=9606 GN=PDIA6 PE=1 SV=1	0	169.65	48	17	92	17	48.1	5.08	285.29	8.981	PDIA6
High	IsMasterProtein	O95373	Importin-7 OS=Homo sapiens OX=9606 GN=IPO7 PE=1 SV=1	0	178.114	24	20	101	20	119.4	4.82	274.69	8.957	IPO7
High	IsMasterProtein	P60891	Ribose-phosphate pyrophosphokinase 1 OS=Homo sapiens OX=9606 GN=PRPS1 PE=1 SV=2	0	110.502	53	13	49	5	34.8	6.98	150.58	8.956	PRPS1
High	IsMasterProtein	P51665	26S proteasome non-ATPase regulatory subunit 7 OS=Homo sapiens OX=9606 GN=PSMD7 PE=1 SV=2	0	60.883	41	9	22	9	37	6.77	74.72	8.948	PSMD7
High	IsMasterProtein	O43615	Mitochondrial import inner membrane translocase subunit TIM44 OS=Homo sapiens OX=9606 GN=TIMM44 PE=1 SV=2	0	22.258	12	4	7	4	51.3	8.32	20.6	8.938	TIMM44
High	IsMasterProtein	P43246	DNA mismatch repair protein Msh2 OS=Homo sapiens OX=9606 GN=MSH2 PE=1 SV=1	0	95.8	22	16	48	16	104.7	5.77	111.74	8.933	MSH2
High	IsMasterProtein	O60264	SWI/SNF-related matrix-associated actin-dependent regulator of chromatin subfamily A member 5 OS=Homo sapiens OX=9606 GN=SMARCA5 PE=1 SV=1	0	76.782	16	15	35	15	121.8	8.09	89.53	8.931	SMARCA5
High	IsMasterProtein	Q9BVP2	Guanine nucleotide-binding protein-like 3 OS=Homo sapiens OX=9606 GN=GNL3 PE=1 SV=2	0	178.103	49	23	92	23	62	9.16	251.86	8.93	GNL3
High	IsMasterProtein	Q9NQ29	Putative RNA-binding protein Luc7-like 1 OS=Homo sapiens OX=9606 GN=LUC7L PE=1 SV=1	0	49.973	22	8	33	3	43.7	9.92	100.66	8.919	LUC7L
High	IsMasterProtein	Q8NBJ7	Inactive C-alpha-formylglycine-generating enzyme 2 OS=Homo sapiens OX=9606 GN=SUMF2 PE=1 SV=2	0	9.194	9	2	3	2	33.8	8	7.47	8.915	SUMF2
High	IsMasterProtein	Q86W42	THO complex subunit 6 homolog OS=Homo sapiens OX=9606 GN=THOC6 PE=1 SV=1	0	10.067	9	2	5	2	37.5	7.43	15.34	8.858	THOC6
High	IsMasterProtein	P08237	ATP-dependent 6-phosphofructokinase, muscle type OS=Homo sapiens OX=9606 GN=PFKM PE=1 SV=2	0	141.047	38	20	55	18	85.1	7.99	154.73	8.849	PFKM
High	IsMasterProtein	Q7L2E3	ATP-dependent RNA helicase DHX30 OS=Homo sapiens OX=9606 GN=DHX30 PE=1 SV=1	0	12.122	3	4	6	4	133.9	8.78	10.99	8.819	DHX30
High	IsMasterProtein	O00401	Neural Wiskott-Aldrich syndrome protein OS=Homo sapiens OX=9606 GN=WASL PE=1 SV=2	0	28.627	18	4	11	4	54.8	7.93	30.37	8.808	WASL; ASB15
High	IsMasterProtein	Q9BQ67	Glutamate-rich WD repeat-containing protein 1 OS=Homo sapiens OX=9606 GN=GRWD1 PE=1 SV=1	0	27.225	10	3	6	3	49.4	4.92	18.78	8.757	GRWD1
High	IsMasterProtein	O00425	Insulin-like growth factor 2 mRNA-binding protein 3 OS=Homo sapiens OX=9606 GN=IGF2BP3 PE=1 SV=2	0	67.413	23	9	21	8	63.7	8.87	62.91	8.745	IGF2BP3
High	IsMasterProtein	Q9UBF2	Coatomer subunit gamma-2 OS=Homo sapiens OX=9606 GN=COPG2 PE=1 SV=1	0	25.503	8	4	17	3	97.6	5.81	27.59	8.741	COPG2
High	IsMasterProtein	Q969S3	Zinc finger protein 622 OS=Homo sapiens OX=9606 GN=ZNF622 PE=1 SV=1	0	19.774	10	3	7	3	54.2	6.15	23.29	8.72	ZNF622
High	IsMasterProtein	P42766	60S ribosomal protein L35 OS=Homo sapiens OX=9606 GN=RPL35 PE=1 SV=2	0	55.363	39	8	70	8	14.5	11.05	183.55	8.701	RPL35
High	IsMasterProtein	Q14152	Eukaryotic translation initiation factor 3 subunit A OS=Homo sapiens OX=9606 GN=EIF3A PE=1 SV=1	0	226.212	30	34	107	34	166.5	6.79	288.7	8.685	EIF3A
High	IsMasterProtein	P17812	CTP synthase 1 OS=Homo sapiens OX=9606 GN=CTPS1 PE=1 SV=2	0	93.312	27	13	49	13	66.6	6.46	139.34	8.648	CTPS1
High	IsMasterProtein	P08559	Pyruvate dehydrogenase E1 component subunit alpha, somatic form, mitochondrial OS=Homo sapiens OX=9606 GN=PDHA1 PE=1 SV=3	0	88.914	44	15	47	15	43.3	8.06	131.48	8.618	PDHA1
High	IsMasterProtein	Q9UPN9	E3 ubiquitin-protein ligase TRIM33 OS=Homo sapiens OX=9606 GN=TRIM33 PE=1 SV=3	0	19.265	3	3	6	3	122.5	6.67	18.03	8.583	TRIM33
High	IsMasterProtein	Q92878	DNA repair protein RAD50 OS=Homo sapiens OX=9606 GN=RAD50 PE=1 SV=1	0	44.5	8	7	17	7	153.8	6.89	47.5	8.576	RAD50
High	IsMasterProtein	Q9Y5L0	Transportin-3 OS=Homo sapiens OX=9606 GN=TNPO3 PE=1 SV=3	0	27.782	8	4	12	4	104.1	5.57	20.78	8.568	TNPO3
High	IsMasterProtein	O94979	Protein transport protein Sec31A OS=Homo sapiens OX=9606 GN=SEC31A PE=1 SV=3	0	20.033	3	3	8	3	132.9	6.89	23.71	8.551	SEC31A
High	IsMasterProtein	Q15654	Thyroid receptor-interacting protein 6 OS=Homo sapiens OX=9606 GN=TRIP6 PE=1 SV=3	0	21.121	10	3	6	3	50.3	7.37	21.54	8.539	TRIP6
High	IsMasterProtein	Q8WU90	Zinc finger CCCH domain-containing protein 15 OS=Homo sapiens OX=9606 GN=ZC3H15 PE=1 SV=1	0	90.809	35	12	30	12	48.6	5.31	99.23	8.524	ZC3H15
High	IsMasterProtein	O43175	D-3-phosphoglycerate dehydrogenase OS=Homo sapiens OX=9606 GN=PHGDH PE=1 SV=4	0	226.431	54	22	164	22	56.6	6.71	459.18	8.511	PHGDH
High	IsMasterProtein	P14866	Heterogeneous nuclear ribonucleoprotein L OS=Homo sapiens OX=9606 GN=HNRNPL PE=1 SV=2	0	235.182	46	20	144	19	64.1	8.22	480.52	8.508	HNRNPL
High	IsMasterProtein	Q8TEX9	Importin-4 OS=Homo sapiens OX=9606 GN=IPO4 PE=1 SV=2	0	103.236	17	11	37	11	118.6	4.96	98.16	8.508	IPO4
High	IsMasterProtein	P42765	3-ketoacyl-CoA thiolase, mitochondrial OS=Homo sapiens OX=9606 GN=ACAA2 PE=1 SV=2	0	126.031	57	13	39	13	41.9	8.09	123.51	8.421	ACAA2
High	IsMasterProtein	Q8N7H5	RNA polymerase II-associated factor 1 homolog OS=Homo sapiens OX=9606 GN=PAF1 PE=1 SV=2	0	22.517	9	4	8	4	59.9	4.63	20.03	8.418	PAF1
High	IsMasterProtein	O95456	Proteasome assembly chaperone 1 OS=Homo sapiens OX=9606 GN=PSMG1 PE=1 SV=1	0	11.231	25	4	5	4	32.8	7.17	6.82	8.402	PSMG1
High	IsMasterProtein	O43865	S-adenosylhomocysteine hydrolase-like protein 1 OS=Homo sapiens OX=9606 GN=AHCYL1 PE=1 SV=2	0	35.22	11	6	18	4	58.9	6.89	39.18	8.401	AHCYL1
High	IsMasterProtein	Q02543	60S ribosomal protein L18a OS=Homo sapiens OX=9606 GN=RPL18A PE=1 SV=2	0	55.782	44	9	81	9	20.7	10.71	198.82	8.377	RPL18A
High	IsMasterProtein	P50570	Dynamin-2 OS=Homo sapiens OX=9606 GN=DNM2 PE=1 SV=2	0	50.557	14	10	21	10	98	7.44	52	8.359	DNM2
High	IsMasterProtein	Q6DKI1	60S ribosomal protein L7-like 1 OS=Homo sapiens OX=9606 GN=RPL7L1 PE=1 SV=2	0	18.08	21	4	10	4	29.7	10.52	13.04	8.298
High	IsMasterProtein	P24666	Low molecular weight phosphotyrosine protein phosphatase OS=Homo sapiens OX=9606 GN=ACP1 PE=1 SV=3	0	73.658	68	9	30	9	18	6.74	101.17	8.28	ACP1
High	IsMasterProtein	Q99829	Copine-1 OS=Homo sapiens OX=9606 GN=CPNE1 PE=1 SV=1	0	42.951	11	4	24	4	59	5.83	43.36	8.27	CPNE1
High	IsMasterProtein	P62917	60S ribosomal protein L8 OS=Homo sapiens OX=9606 GN=RPL8 PE=1 SV=2	0	241.763	63	20	317	20	28	11.03	606.02	8.234	RPL8
High	IsMasterProtein	P52789	Hexokinase-2 OS=Homo sapiens OX=9606 GN=HK2 PE=1 SV=2	0	16.567	8	6	11	3	102.3	6.05	14.54	8.191	HK2
High	IsMasterProtein	Q00610	Clathrin heavy chain 1 OS=Homo sapiens OX=9606 GN=CLTC PE=1 SV=5	0	414.209	39	45	167	45	191.5	5.69	525.87	8.177	CLTC
High	IsMasterProtein	Q16822	Phosphoenolpyruvate carboxykinase [GTP], mitochondrial OS=Homo sapiens OX=9606 GN=PCK2 PE=1 SV=4	0	37.992	14	6	14	6	70.7	7.62	42.5	8.171
High	IsMasterProtein	Q13151	Heterogeneous nuclear ribonucleoprotein A0 OS=Homo sapiens OX=9606 GN=HNRNPA0 PE=1 SV=1	0	67.73	40	8	36	6	30.8	9.29	114.99	8.144	HNRNPA0
High	IsMasterProtein	Q93009	Ubiquitin carboxyl-terminal hydrolase 7 OS=Homo sapiens OX=9606 GN=USP7 PE=1 SV=2	0	69.31	16	10	35	10	128.2	5.55	90.78	8.132	USP7
High	IsMasterProtein	O95478	Ribosome biogenesis protein NSA2 homolog OS=Homo sapiens OX=9606 GN=NSA2 PE=1 SV=1	0	10.802	9	2	5	2	30	10.27	13.92	8.116	NSA2
High	IsMasterProtein	Q71UI9	Histone H2A.V OS=Homo sapiens OX=9606 GN=H2AFV PE=1 SV=3	0	60.095	54	6	342	4	13.5	10.58	348.01	8.098	H2AFV
High	IsMasterProtein	Q96CW1	AP-2 complex subunit mu OS=Homo sapiens OX=9606 GN=AP2M1 PE=1 SV=2	0	27.588	15	5	13	5	49.6	9.54	35.76	8.071	AP2M1
High	IsMasterProtein	Q9Y4L1	Hypoxia up-regulated protein 1 OS=Homo sapiens OX=9606 GN=HYOU1 PE=1 SV=1	0	145.567	25	16	55	16	111.3	5.22	150.77	8.052	HYOU1
High	IsMasterProtein	O75533	Splicing factor 3B subunit 1 OS=Homo sapiens OX=9606 GN=SF3B1 PE=1 SV=3	0	215.668	32	28	91	28	145.7	7.09	289.39	8.041	SF3B1
High	IsMasterProtein	P11908	Ribose-phosphate pyrophosphokinase 2 OS=Homo sapiens OX=9606 GN=PRPS2 PE=1 SV=2	0	106.534	49	12	46	4	34.7	6.61	140.01	8.024	PRPS2
High	IsMasterProtein	P07437	Tubulin beta chain OS=Homo sapiens OX=9606 GN=TUBB PE=1 SV=2	0	501.315	73	28	579	5	49.6	4.89	1786.68	7.993	TUBB
High	IsMasterProtein	P16615	Sarcoplasmic/endoplasmic reticulum calcium ATPase 2 OS=Homo sapiens OX=9606 GN=ATP2A2 PE=1 SV=1	0	76.365	15	10	29	10	114.7	5.34	94.05	7.988	ATP2A2
High	IsMasterProtein	Q9UHD1	Cysteine and histidine-rich domain-containing protein 1 OS=Homo sapiens OX=9606 GN=CHORDC1 PE=1 SV=2	0	50.865	26	5	17	5	37.5	7.87	50.42	7.985	CHORDC1
High	IsMasterProtein	Q6PI48	Aspartate--tRNA ligase, mitochondrial OS=Homo sapiens OX=9606 GN=DARS2 PE=1 SV=1	0	24.824	9	4	12	4	73.5	8.02	41.46	7.964	DARS2
High	IsMasterProtein	Q96ST3	Paired amphipathic helix protein Sin3a OS=Homo sapiens OX=9606 GN=SIN3A PE=1 SV=2	0	12.637	4	4	8	4	145.1	7.25	13.23	7.961	SIN3A
High	IsMasterProtein	O14950	Myosin regulatory light chain 12B OS=Homo sapiens OX=9606 GN=MYL12B PE=1 SV=2	0	65.26	56	7	25	7	19.8	4.84	80.3	7.959	MYL12B; MYL12A
High	IsMasterProtein	P11172	Uridine 5'-monophosphate synthase OS=Homo sapiens OX=9606 GN=UMPS PE=1 SV=1	0	17.676	13	3	7	3	52.2	7.24	20.44	7.957	UMPS
High	IsMasterProtein	Q14684	Ribosomal RNA processing protein 1 homolog B OS=Homo sapiens OX=9606 GN=RRP1B PE=1 SV=3	0	20.923	8	4	5	4	84.4	9.76	9.89	7.954	RRP1B
High	IsMasterProtein	P06493	Cyclin-dependent kinase 1 OS=Homo sapiens OX=9606 GN=CDK1 PE=1 SV=3	0	117.474	53	14	62	12	34.1	8.4	177.98	7.887	CDK1
High	IsMasterProtein	Q96EE3	Nucleoporin SEH1 OS=Homo sapiens OX=9606 GN=SEH1L PE=1 SV=3	0	21.796	14	3	6	3	39.6	8.09	20.69	7.887	SEH1L
High	IsMasterProtein	Q9Y6W5	Wiskott-Aldrich syndrome protein family member 2 OS=Homo sapiens OX=9606 GN=WASF2 PE=1 SV=3	0	14.551	6	2	4	2	54.3	5.53	7.28	7.881	WASF2
High	IsMasterProtein	P55060	Exportin-2 OS=Homo sapiens OX=9606 GN=CSE1L PE=1 SV=3	0	291.52	44	35	212	35	110.3	5.77	394.08	7.868	CSE1L
High	IsMasterProtein	P09669	Cytochrome c oxidase subunit 6C OS=Homo sapiens OX=9606 GN=COX6C PE=1 SV=2	0	7.261	27	2	2	2	8.8	10.39	5.46	7.812	COX6C
High	IsMasterProtein	P10644	cAMP-dependent protein kinase type I-alpha regulatory subunit OS=Homo sapiens OX=9606 GN=PRKAR1A PE=1 SV=1	0	33.747	17	5	16	5	43	5.35	47.75	7.802	PRKAR1A
High	IsMasterProtein	O14980	Exportin-1 OS=Homo sapiens OX=9606 GN=XPO1 PE=1 SV=1	0	234.676	34	25	141	25	123.3	6.06	353.37	7.801	XPO1
High	IsMasterProtein	O43592	Exportin-T OS=Homo sapiens OX=9606 GN=XPOT PE=1 SV=2	0	42.608	11	7	15	7	109.9	5.39	33.68	7.79	XPOT
High	IsMasterProtein	Q9NVP1	ATP-dependent RNA helicase DDX18 OS=Homo sapiens OX=9606 GN=DDX18 PE=1 SV=2	0	23.949	12	6	13	6	75.4	9.5	21.73	7.774	DDX18
High	IsMasterProtein	P17980	26S proteasome regulatory subunit 6A OS=Homo sapiens OX=9606 GN=PSMC3 PE=1 SV=3	0	131.05	38	13	61	13	49.2	5.24	156.59	7.761	PSMC3
High	IsMasterProtein	Q9Y5M8	Signal recognition particle receptor subunit beta OS=Homo sapiens OX=9606 GN=SRPRB PE=1 SV=3	0	17.968	15	3	6	3	29.7	9.04	16.46	7.749	SRPRB
High	IsMasterProtein	Q68E01	Integrator complex subunit 3 OS=Homo sapiens OX=9606 GN=INTS3 PE=1 SV=1	0	18.463	4	2	4	2	118	5.8	13.7	7.735	INTS3
High	IsMasterProtein	O43172	U4/U6 small nuclear ribonucleoprotein Prp4 OS=Homo sapiens OX=9606 GN=PRPF4 PE=1 SV=2	0	34.449	15	6	13	6	58.4	7.42	31.89	7.687	PRPF4
High	IsMasterProtein	Q86VP6	Cullin-associated NEDD8-dissociated protein 1 OS=Homo sapiens OX=9606 GN=CAND1 PE=1 SV=2	0	211.129	35	30	112	30	136.3	5.78	308.65	7.681	CAND1
High	IsMasterProtein	Q66K74	Microtubule-associated protein 1S OS=Homo sapiens OX=9606 GN=MAP1S PE=1 SV=2	0	14.895	3	2	4	2	112.1	7.3	17.02	7.674	MAP1S
High	IsMasterProtein	Q00341	Vigilin OS=Homo sapiens OX=9606 GN=HDLBP PE=1 SV=2	0	60.824	13	10	21	10	141.4	6.87	53	7.654	HDLBP
High	IsMasterProtein	Q9Y6E0	Serine/threonine-protein kinase 24 OS=Homo sapiens OX=9606 GN=STK24 PE=1 SV=1	0	48.223	19	6	19	3	49.3	5.69	45.09	7.653	STK24
High	IsMasterProtein	Q92973	Transportin-1 OS=Homo sapiens OX=9606 GN=TNPO1 PE=1 SV=2	0	134.543	31	17	77	15	102.3	4.98	173.17	7.648	TNPO1
High	IsMasterProtein	P49411	Elongation factor Tu, mitochondrial OS=Homo sapiens OX=9606 GN=TUFM PE=1 SV=2	0	236.97	68	23	115	23	49.5	7.61	392.48	7.611	TUFM
High	IsMasterProtein	O60256	Phosphoribosyl pyrophosphate synthase-associated protein 2 OS=Homo sapiens OX=9606 GN=PRPSAP2 PE=1 SV=1	0	13.205	8	2	3	2	40.9	7.44	8.54	7.61	PRPSAP2
High	IsMasterProtein	Q9Y2Q3	Glutathione S-transferase kappa 1 OS=Homo sapiens OX=9606 GN=GSTK1 PE=1 SV=3	0	40.801	34	6	20	6	25.5	8.41	56.8	7.608	GSTK1
High	IsMasterProtein	Q6DD88	Atlastin-3 OS=Homo sapiens OX=9606 GN=ATL3 PE=1 SV=1	0	75.224	35	12	29	12	60.5	5.66	91.4	7.607	ATL3
High	IsMasterProtein	P35268	60S ribosomal protein L22 OS=Homo sapiens OX=9606 GN=RPL22 PE=1 SV=2	0	110.048	69	9	158	9	14.8	9.19	486.66	7.6	RPL22
High	IsMasterProtein	O43813	Glutathione S-transferase LANCL1 OS=Homo sapiens OX=9606 GN=LANCL1 PE=1 SV=1	0	36.219	22	5	12	5	45.3	7.75	41.43	7.588	LANCL1
High	IsMasterProtein	P32969	60S ribosomal protein L9 OS=Homo sapiens OX=9606 GN=RPL9 PE=1 SV=1	0	170.757	66	12	114	12	21.9	9.95	354.1	7.573	RPL9
High	IsMasterProtein	Q9Y2X3	Nucleolar protein 58 OS=Homo sapiens OX=9606 GN=NOP58 PE=1 SV=1	0	36.095	11	4	19	4	59.5	8.92	51.41	7.572	NOP58
High	IsMasterProtein	Q08J23	RNA cytosine C(5)-methyltransferase NSUN2 OS=Homo sapiens OX=9606 GN=NSUN2 PE=1 SV=2	0	302.271	58	30	143	30	86.4	6.77	419.81	7.567	NSUN2
High	IsMasterProtein	P12277	Creatine kinase B-type OS=Homo sapiens OX=9606 GN=CKB PE=1 SV=1	0	30.286	12	3	7	3	42.6	5.59	21.35	7.548	CKB
High	IsMasterProtein	P00374	Dihydrofolate reductase OS=Homo sapiens OX=9606 GN=DHFR PE=1 SV=2	0	40.011	44	7	27	7	21.4	7.42	58.28	7.545	DHFR; DHFRP1
High	IsMasterProtein	P40818	Ubiquitin carboxyl-terminal hydrolase 8 OS=Homo sapiens OX=9606 GN=USP8 PE=1 SV=1	0	12.206	3	2	4	2	127.4	8.51	12.35	7.535	USP8
High	IsMasterProtein	P55010	Eukaryotic translation initiation factor 5 OS=Homo sapiens OX=9606 GN=EIF5 PE=1 SV=2	0	81.926	38	13	58	13	49.2	5.58	147.7	7.443	EIF5
High	IsMasterProtein	P26368	Splicing factor U2AF 65 kDa subunit OS=Homo sapiens OX=9606 GN=U2AF2 PE=1 SV=4	0	140.367	41	14	68	14	53.5	9.09	215.56	7.426	U2AF2
High	IsMasterProtein	Q5JVF3	PCI domain-containing protein 2 OS=Homo sapiens OX=9606 GN=PCID2 PE=1 SV=2	0	11.664	10	3	4	3	46	8.53	8.6	7.417	PCID2
High	IsMasterProtein	Q96I24	Far upstream element-binding protein 3 OS=Homo sapiens OX=9606 GN=FUBP3 PE=1 SV=2	0	88.55	29	11	32	11	61.6	8.38	98.57	7.413	FUBP3
High	IsMasterProtein	Q9BY44	Eukaryotic translation initiation factor 2A OS=Homo sapiens OX=9606 GN=EIF2A PE=1 SV=3	0	167.493	47	18	70	18	64.9	8.87	247.41	7.41	EIF2A
High	IsMasterProtein	P60842	Eukaryotic initiation factor 4A-I OS=Homo sapiens OX=9606 GN=EIF4A1 PE=1 SV=1	0	252.898	68	26	214	14	46.1	5.48	633.3	7.404	EIF4A1
High	IsMasterProtein	P20042	Eukaryotic translation initiation factor 2 subunit 2 OS=Homo sapiens OX=9606 GN=EIF2S2 PE=1 SV=2	0	288.581	71	28	172	28	38.4	5.8	525.3	7.391	EIF2S2
High	IsMasterProtein	Q9NSD9	Phenylalanine--tRNA ligase beta subunit OS=Homo sapiens OX=9606 GN=FARSB PE=1 SV=3	0	39.794	21	10	20	10	66.1	6.84	48.67	7.384	FARSB
High	IsMasterProtein	P23921	Ribonucleoside-diphosphate reductase large subunit OS=Homo sapiens OX=9606 GN=RRM1 PE=1 SV=1	0	245.817	52	29	114	29	90	7.15	342.57	7.356	RRM1
High	IsMasterProtein	P25205	DNA replication licensing factor MCM3 OS=Homo sapiens OX=9606 GN=MCM3 PE=1 SV=3	0	147.725	31	18	67	18	90.9	5.77	198.99	7.354	MCM3
High	IsMasterProtein	O75152	Zinc finger CCCH domain-containing protein 11A OS=Homo sapiens OX=9606 GN=ZC3H11A PE=1 SV=3	0	18.389	6	3	3	3	89.1	8.37	11.71	7.35	ZC3H11A
High	IsMasterProtein	P84098	60S ribosomal protein L19 OS=Homo sapiens OX=9606 GN=RPL19 PE=1 SV=1	0	85.931	28	9	67	9	23.5	11.47	189.07	7.346	RPL19
High	IsMasterProtein	P27694	Replication protein A 70 kDa DNA-binding subunit OS=Homo sapiens OX=9606 GN=RPA1 PE=1 SV=2	0	59.591	21	9	26	9	68.1	7.21	81.15	7.311	RPA1
High	IsMasterProtein	O95071	E3 ubiquitin-protein ligase UBR5 OS=Homo sapiens OX=9606 GN=UBR5 PE=1 SV=2	0	42.934	4	7	19	7	309.2	5.85	37.84	7.311	UBR5
High	IsMasterProtein	Q9NTJ3	Structural maintenance of chromosomes protein 4 OS=Homo sapiens OX=9606 GN=SMC4 PE=1 SV=2	0	205.411	30	26	82	26	147.1	6.79	230.78	7.304	SMC4
High	IsMasterProtein	P26640	Valine--tRNA ligase OS=Homo sapiens OX=9606 GN=VARS PE=1 SV=4	0	167.435	27	24	72	24	140.4	7.59	188.04	7.28	VARS; VARS2
High	IsMasterProtein	P31689	DnaJ homolog subfamily A member 1 OS=Homo sapiens OX=9606 GN=DNAJA1 PE=1 SV=2	0	35.762	22	5	13	5	44.8	7.08	36.23	7.276	DNAJA1
High	IsMasterProtein	Q08211	ATP-dependent RNA helicase A OS=Homo sapiens OX=9606 GN=DHX9 PE=1 SV=4	0	452.165	49	47	251	47	140.9	6.84	706.63	7.275	DHX9
High	IsMasterProtein	P30566	Adenylosuccinate lyase OS=Homo sapiens OX=9606 GN=ADSL PE=1 SV=2	0	50.896	29	8	18	8	54.9	7.11	55.45	7.273	ADSL
High	IsMasterProtein	P36776	Lon protease homolog, mitochondrial OS=Homo sapiens OX=9606 GN=LONP1 PE=1 SV=2	0	44.23	14	7	20	7	106.4	6.39	32.83	7.269	LONP1
High	IsMasterProtein	P62266	40S ribosomal protein S23 OS=Homo sapiens OX=9606 GN=RPS23 PE=1 SV=3	0	73.274	50	8	105	8	15.8	10.49	259.68	7.265	RPS23
High	IsMasterProtein	O75153	Clustered mitochondria protein homolog OS=Homo sapiens OX=9606 GN=CLUH PE=1 SV=2	0	83.228	14	13	32	12	146.6	6.13	78.52	7.243	CLUH; KIAA0664
High	IsMasterProtein	Q86VM9	Zinc finger CCCH domain-containing protein 18 OS=Homo sapiens OX=9606 GN=ZC3H18 PE=1 SV=2	0	31.436	9	5	12	5	106.3	8.32	38.3	7.242	ZC3H18
High	IsMasterProtein	Q8TDX7	Serine/threonine-protein kinase Nek7 OS=Homo sapiens OX=9606 GN=NEK7 PE=1 SV=1	0	8.685	8	2	4	2	34.5	8.25	14.19	7.232	NEK7
High	IsMasterProtein	P13929	Beta-enolase OS=Homo sapiens OX=9606 GN=ENO3 PE=1 SV=5	0	122.854	40	11	421	4	47	7.71	686.31	7.228	ENO3
High	IsMasterProtein	Q14204	Cytoplasmic dynein 1 heavy chain 1 OS=Homo sapiens OX=9606 GN=DYNC1H1 PE=1 SV=5	0	393.403	17	55	131	55	532.1	6.4	378.29	7.228	DYNC1H1
High	IsMasterProtein	P30101	Protein disulfide-isomerase A3 OS=Homo sapiens OX=9606 GN=PDIA3 PE=1 SV=4	0	298.279	63	29	166	29	56.7	6.35	572.8	7.196	PDIA3
High	IsMasterProtein	Q9BRU9	rRNA-processing protein UTP23 homolog OS=Homo sapiens OX=9606 GN=UTP23 PE=1 SV=2	0	3.712	9	2	3	2	28.4	10.07	4.95	7.167	UTP23
High	IsMasterProtein	P49792	E3 SUMO-protein ligase RanBP2 OS=Homo sapiens OX=9606 GN=RANBP2 PE=1 SV=2	0	36.25	3	8	15	7	358	6.2	30.02	7.159	RANBP2
High	IsMasterProtein	Q15021	Condensin complex subunit 1 OS=Homo sapiens OX=9606 GN=NCAPD2 PE=1 SV=3	0	94.251	15	14	35	14	157.1	6.61	78.67	7.153	NCAPD2
High	IsMasterProtein	Q6P2Q9	Pre-mRNA-processing-splicing factor 8 OS=Homo sapiens OX=9606 GN=PRPF8 PE=1 SV=2	0	488.866	40	73	260	73	273.4	8.84	630.32	7.15	PRPF8
High	IsMasterProtein	P49207	60S ribosomal protein L34 OS=Homo sapiens OX=9606 GN=RPL34 PE=1 SV=3	0	16.67	38	7	20	7	13.3	11.47	43.45	7.079	RPL34
High	IsMasterProtein	P27708	CAD protein OS=Homo sapiens OX=9606 GN=CAD PE=1 SV=3	0	232.224	22	29	98	26	242.8	6.46	251.84	7.076	CAD
High	IsMasterProtein	Q53GS9	U4/U6.U5 tri-snRNP-associated protein 2 OS=Homo sapiens OX=9606 GN=USP39 PE=1 SV=2	0	85.059	26	9	40	9	65.3	8.91	99.44	7.07	USP39
High	IsMasterProtein	P61978	Heterogeneous nuclear ribonucleoprotein K OS=Homo sapiens OX=9606 GN=HNRNPK PE=1 SV=1	0	339.204	65	27	245	27	50.9	5.54	753.52	7.06	HNRNPK
High	IsMasterProtein	P53618	Coatomer subunit beta OS=Homo sapiens OX=9606 GN=COPB1 PE=1 SV=3	0	103.402	22	13	37	13	107.1	6.05	99.51	7.051	COPB1
High	IsMasterProtein	O94776	Metastasis-associated protein MTA2 OS=Homo sapiens OX=9606 GN=MTA2 PE=1 SV=1	0	81.14	28	13	47	12	75	9.66	118.73	7.024	MTA2
High	IsMasterProtein	P24941	Cyclin-dependent kinase 2 OS=Homo sapiens OX=9606 GN=CDK2 PE=1 SV=2	0	56.519	46	10	31	8	33.9	8.68	82.43	7.002	CDK2
High	IsMasterProtein	P40616	ADP-ribosylation factor-like protein 1 OS=Homo sapiens OX=9606 GN=ARL1 PE=1 SV=1	0	19.217	17	2	9	2	20.4	5.72	16.6	6.991	ARL1
High	IsMasterProtein	P60953	Cell division control protein 42 homolog OS=Homo sapiens OX=9606 GN=CDC42 PE=1 SV=2	0	47.228	26	4	38	4	21.2	6.55	102.5	6.986	CDC42
High	IsMasterProtein	Q14203	Dynactin subunit 1 OS=Homo sapiens OX=9606 GN=DCTN1 PE=1 SV=3	0	31.117	7	6	13	6	141.6	5.81	26.47	6.959	DCTN1
High	IsMasterProtein	P13489	Ribonuclease inhibitor OS=Homo sapiens OX=9606 GN=RNH1 PE=1 SV=2	0	155.238	55	14	54	14	49.9	4.82	183.23	6.946	RNH1
High	IsMasterProtein	O75534	Cold shock domain-containing protein E1 OS=Homo sapiens OX=9606 GN=CSDE1 PE=1 SV=2	0	67.22	21	12	23	12	88.8	6.25	64.36	6.936	CSDE1
High	IsMasterProtein	Q9Y3I0	tRNA-splicing ligase RtcB homolog OS=Homo sapiens OX=9606 GN=RTCB PE=1 SV=1	0	111.562	40	15	55	15	55.2	7.23	148.07	6.909	C22orf28; RTCB
High	IsMasterProtein	Q13464	Rho-associated protein kinase 1 OS=Homo sapiens OX=9606 GN=ROCK1 PE=1 SV=1	0	19.437	3	4	8	1	158.1	5.9	15.82	6.902	ROCK1
High	IsMasterProtein	O15371	Eukaryotic translation initiation factor 3 subunit D OS=Homo sapiens OX=9606 GN=EIF3D PE=1 SV=1	0	114.575	31	14	43	14	63.9	6.05	128.36	6.901	EIF3D
High	IsMasterProtein	Q9NXH9	tRNA (guanine(26)-N(2))-dimethyltransferase OS=Homo sapiens OX=9606 GN=TRMT1 PE=1 SV=1	0	28.343	6	2	9	2	72.2	7.64	24.34	6.895	TRMT1
High	IsMasterProtein	O60879	Protein diaphanous homolog 2 OS=Homo sapiens OX=9606 GN=DIAPH2 PE=1 SV=1	0	6.379	2	2	2	2	125.5	6.58	1.75	6.875	DIAPH2
High	IsMasterProtein	Q9NVU7	Protein SDA1 homolog OS=Homo sapiens OX=9606 GN=SDAD1 PE=1 SV=3	0	27.355	8	5	13	5	79.8	9.25	20.28	6.868	SDAD1
High	IsMasterProtein	Q8N1G4	Leucine-rich repeat-containing protein 47 OS=Homo sapiens OX=9606 GN=LRRC47 PE=1 SV=1	0	86.777	29	11	35	11	63.4	8.28	100.96	6.866	LRRC47
High	IsMasterProtein	O43396	Thioredoxin-like protein 1 OS=Homo sapiens OX=9606 GN=TXNL1 PE=1 SV=3	0	54.689	36	7	23	7	32.2	4.96	51.95	6.865	TXNL1
High	IsMasterProtein	Q9BYD3	39S ribosomal protein L4, mitochondrial OS=Homo sapiens OX=9606 GN=MRPL4 PE=1 SV=1	0	29	19	3	8	3	34.9	9.72	29.37	6.858	MRPL4
High	IsMasterProtein	O60502	Protein O-GlcNAcase OS=Homo sapiens OX=9606 GN=OGA PE=1 SV=2	0	105.956	21	15	60	15	102.8	4.91	138.01	6.832	MGEA5
High	IsMasterProtein	O75306	NADH dehydrogenase [ubiquinone] iron-sulfur protein 2, mitochondrial OS=Homo sapiens OX=9606 GN=NDUFS2 PE=1 SV=2	0	9.885	5	2	4	2	52.5	7.55	9.01	6.809	NDUFS2
High	IsMasterProtein	Q15418	Ribosomal protein S6 kinase alpha-1 OS=Homo sapiens OX=9606 GN=RPS6KA1 PE=1 SV=2	0	39.279	16	8	18	6	82.7	7.83	36.78	6.806	RPS6KA1
High	IsMasterProtein	Q96TA1	Protein Niban 2 OS=Homo sapiens OX=9606 GN=NIBAN2 PE=1 SV=3	0	101.904	26	14	44	14	84.1	6.19	126.14	6.795	FAM129B
High	IsMasterProtein	Q8WVM8	Sec1 family domain-containing protein 1 OS=Homo sapiens OX=9606 GN=SCFD1 PE=1 SV=4	0	22.68	11	4	7	4	72.3	6.27	17.44	6.791	SCFD1
High	IsMasterProtein	Q92995	Ubiquitin carboxyl-terminal hydrolase 13 OS=Homo sapiens OX=9606 GN=USP13 PE=1 SV=2	0	8.642	3	3	4	1	97.3	5.53	6.57	6.79	USP13
High	IsMasterProtein	P25685	DnaJ homolog subfamily B member 1 OS=Homo sapiens OX=9606 GN=DNAJB1 PE=1 SV=4	0	37.204	21	5	19	5	38	8.63	50.83	6.777	DNAJB1
High	IsMasterProtein	Q9Y263	Phospholipase A-2-activating protein OS=Homo sapiens OX=9606 GN=PLAA PE=1 SV=2	0	36.713	11	6	16	6	87.1	6.37	42.66	6.771	PLAA
High	IsMasterProtein	Q9BV86	N-terminal Xaa-Pro-Lys N-methyltransferase 1 OS=Homo sapiens OX=9606 GN=NTMT1 PE=1 SV=3	0	49.389	39	6	17	6	25.4	5.52	50.74	6.751	NTMT1
High	IsMasterProtein	Q9BZE4	Nucleolar GTP-binding protein 1 OS=Homo sapiens OX=9606 GN=GTPBP4 PE=1 SV=3	0	79.638	25	11	30	11	73.9	9.5	94.5	6.735	GTPBP4
High	IsMasterProtein	P55786	Puromycin-sensitive aminopeptidase OS=Homo sapiens OX=9606 GN=NPEPPS PE=1 SV=2	0	140.282	26	17	62	17	103.2	5.72	174.46	6.7	NPEPPS
High	IsMasterProtein	O43747	AP-1 complex subunit gamma-1 OS=Homo sapiens OX=9606 GN=AP1G1 PE=1 SV=5	0	10.808	6	3	6	3	91.3	6.8	0	6.7	AP1G1
High	IsMasterProtein	Q99575	Ribonucleases P/MRP protein subunit POP1 OS=Homo sapiens OX=9606 GN=POP1 PE=1 SV=2	0	105.802	25	15	35	15	114.6	9.22	98.29	6.698	POP1
High	IsMasterProtein	Q13907	Isopentenyl-diphosphate Delta-isomerase 1 OS=Homo sapiens OX=9606 GN=IDI1 PE=1 SV=2	0	34.374	36	4	11	4	26.3	6.34	37.02	6.682	IDI1
High	IsMasterProtein	O60716	Catenin delta-1 OS=Homo sapiens OX=9606 GN=CTNND1 PE=1 SV=1	0	34.533	9	5	9	5	108.1	6.23	25.43	6.665	CTNND1
High	IsMasterProtein	P00568	Adenylate kinase isoenzyme 1 OS=Homo sapiens OX=9606 GN=AK1 PE=1 SV=3	0	84.076	53	9	34	9	21.6	8.63	90.05	6.663	AK1
High	IsMasterProtein	P30837	Aldehyde dehydrogenase X, mitochondrial OS=Homo sapiens OX=9606 GN=ALDH1B1 PE=1 SV=3	0	27.305	10	3	8	3	57.2	6.8	18.15	6.648	ALDH1B1
High	IsMasterProtein	Q15366	Poly(rC)-binding protein 2 OS=Homo sapiens OX=9606 GN=PCBP2 PE=1 SV=1	0	117.352	38	10	76	6	38.6	6.79	230.53	6.643	PCBP2
High	IsMasterProtein	Q9H9J2	39S ribosomal protein L44, mitochondrial OS=Homo sapiens OX=9606 GN=MRPL44 PE=1 SV=1	0	31.892	13	4	12	4	37.5	8.4	19.21	6.641	MRPL44
High	IsMasterProtein	Q9NZM5	Ribosome biogenesis protein NOP53 OS=Homo sapiens OX=9606 GN=NOP53 PE=1 SV=2	0	33.212	11	3	7	3	54.4	10.32	23.34	6.624	GLTSCR2; NOP53
High	IsMasterProtein	Q9Y262	Eukaryotic translation initiation factor 3 subunit L OS=Homo sapiens OX=9606 GN=EIF3L PE=1 SV=1	0	101.631	34	14	51	14	66.7	6.34	110.96	6.619	EIF3L
High	IsMasterProtein	P49736	DNA replication licensing factor MCM2 OS=Homo sapiens OX=9606 GN=MCM2 PE=1 SV=4	0	173.896	34	21	72	21	101.8	5.52	211.91	6.604	MCM2
High	IsMasterProtein	P16152	Carbonyl reductase [NADPH] 1 OS=Homo sapiens OX=9606 GN=CBR1 PE=1 SV=3	0	93.543	50	10	48	10	30.4	8.32	165.84	6.593	CBR1; SETD4
High	IsMasterProtein	Q9BWD1	Acetyl-CoA acetyltransferase, cytosolic OS=Homo sapiens OX=9606 GN=ACAT2 PE=1 SV=2	0	92.635	46	9	31	9	41.3	6.92	95.22	6.589	ACAT2
High	IsMasterProtein	Q9H8Y5	Ankyrin repeat and zinc finger domain-containing protein 1 OS=Homo sapiens OX=9606 GN=ANKZF1 PE=1 SV=1	0	9.346	5	3	4	3	80.9	8.41	8.11	6.561	ANKZF1
High	IsMasterProtein	Q9Y4W2	Ribosomal biogenesis protein LAS1L OS=Homo sapiens OX=9606 GN=LAS1L PE=1 SV=2	0	47.549	16	6	14	6	83	4.73	41.3	6.557	LAS1L
High	IsMasterProtein	P06132	Uroporphyrinogen decarboxylase OS=Homo sapiens OX=9606 GN=UROD PE=1 SV=2	0	18.821	10	2	5	2	40.8	6.14	16.56	6.553	UROD
High	IsMasterProtein	B5ME19	Eukaryotic translation initiation factor 3 subunit C-like protein OS=Homo sapiens OX=9606 GN=EIF3CL PE=1 SV=1	0	78.004	17	12	33	12	105.4	5.64	107.78	6.543	EIF3CL
High	IsMasterProtein	P61247	40S ribosomal protein S3a OS=Homo sapiens OX=9606 GN=RPS3A PE=1 SV=2	0	226.407	68	25	412	25	29.9	9.73	725.29	6.541	RPS3A
High	IsMasterProtein	Q15185	Prostaglandin E synthase 3 OS=Homo sapiens OX=9606 GN=PTGES3 PE=1 SV=1	0	65.719	38	6	33	6	18.7	4.54	93.93	6.54	PTGES3
High	IsMasterProtein	P27635	60S ribosomal protein L10 OS=Homo sapiens OX=9606 GN=RPL10 PE=1 SV=4	0	139.593	50	13	137	13	24.6	10.08	367.01	6.505	RPL10
High	IsMasterProtein	P04792	Heat shock protein beta-1 OS=Homo sapiens OX=9606 GN=HSPB1 PE=1 SV=2	0	138.834	83	16	92	16	22.8	6.4	301.6	6.483	HSPB1
High	IsMasterProtein	P78347	General transcription factor II-I OS=Homo sapiens OX=9606 GN=GTF2I PE=1 SV=2	0	83.932	18	13	33	13	112.3	6.39	80.18	6.474	GTF2I
High	IsMasterProtein	P17858	ATP-dependent 6-phosphofructokinase, liver type OS=Homo sapiens OX=9606 GN=PFKL PE=1 SV=6	0	126.973	27	16	50	13	85	7.5	136.38	6.459	PFKL
High	IsMasterProtein	Q9UBQ7	Glyoxylate reductase/hydroxypyruvate reductase OS=Homo sapiens OX=9606 GN=GRHPR PE=1 SV=1	0	31.625	20	4	9	4	35.6	7.39	34.93	6.451	GRHPR
High	IsMasterProtein	Q9BQE3	Tubulin alpha-1C chain OS=Homo sapiens OX=9606 GN=TUBA1C PE=1 SV=1	0	369.421	82	29	364	4	49.9	5.1	1119.56	6.449	TUBA1C
High	IsMasterProtein	Q9Y3Z3	Deoxynucleoside triphosphate triphosphohydrolase SAMHD1 OS=Homo sapiens OX=9606 GN=SAMHD1 PE=1 SV=2	0	10.47	4	2	5	2	72.2	7.14	13.59	6.448	SAMHD1
High	IsMasterProtein	Q13263	Transcription intermediary factor 1-beta OS=Homo sapiens OX=9606 GN=TRIM28 PE=1 SV=5	0	253.797	52	27	143	27	88.5	5.77	441.85	6.429	TRIM28
High	IsMasterProtein	P42704	Leucine-rich PPR motif-containing protein, mitochondrial OS=Homo sapiens OX=9606 GN=LRPPRC PE=1 SV=3	0	273.065	35	34	106	34	157.8	6.13	271.49	6.377	LRPPRC
High	IsMasterProtein	P10155	60 kDa SS-A/Ro ribonucleoprotein OS=Homo sapiens OX=9606 GN=RO60 PE=1 SV=2	0	67.562	28	11	33	11	60.6	8.03	84.06	6.376	TROVE2
High	IsMasterProtein	P35606	Coatomer subunit beta' OS=Homo sapiens OX=9606 GN=COPB2 PE=1 SV=2	0	70.854	18	11	26	11	102.4	5.27	68.84	6.374	COPB2
High	IsMasterProtein	Q15233	Non-POU domain-containing octamer-binding protein OS=Homo sapiens OX=9606 GN=NONO PE=1 SV=4	0	185.56	58	24	138	23	54.2	8.95	423.37	6.368	NONO
High	IsMasterProtein	P52272	Heterogeneous nuclear ribonucleoprotein M OS=Homo sapiens OX=9606 GN=HNRNPM PE=1 SV=3	0	227.34	54	32	120	32	77.5	8.7	341.81	6.36	HNRNPM
High	IsMasterProtein	Q8IXT5	RNA-binding protein 12B OS=Homo sapiens OX=9606 GN=RBM12B PE=1 SV=2	0	8.722	7	2	5	2	118	6.81	15.48	6.346	RBM12B
High	IsMasterProtein	Q9BV20	Methylthioribose-1-phosphate isomerase OS=Homo sapiens OX=9606 GN=MRI1 PE=1 SV=1	0	26.844	16	5	14	5	39.1	6.3	38.22	6.345	MRI1
High	IsMasterProtein	Q01813	ATP-dependent 6-phosphofructokinase, platelet type OS=Homo sapiens OX=9606 GN=PFKP PE=1 SV=2	0	183.634	36	21	74	19	85.5	7.55	216.53	6.335	PFKP
High	IsMasterProtein	Q9ULX6	A-kinase anchor protein 8-like OS=Homo sapiens OX=9606 GN=AKAP8L PE=1 SV=4	0	14.432	4	2	6	2	71.6	5.05	14.07	6.323	AKAP8L
High	IsMasterProtein	Q16539	Mitogen-activated protein kinase 14 OS=Homo sapiens OX=9606 GN=MAPK14 PE=1 SV=3	0	41.202	39	8	12	8	41.3	5.78	24.62	6.321	MAPK14
High	IsMasterProtein	O60664	Perilipin-3 OS=Homo sapiens OX=9606 GN=PLIN3 PE=1 SV=3	0	126.248	52	13	48	13	47	5.44	164.77	6.316	PLIN3
High	IsMasterProtein	P01889	HLA class I histocompatibility antigen, B alpha chain OS=Homo sapiens OX=9606 GN=HLA-B PE=1 SV=3	0	15.028	7	2	9	1	40.4	5.85	27.09	6.306	HLA-B
High	IsMasterProtein	P31942	Heterogeneous nuclear ribonucleoprotein H3 OS=Homo sapiens OX=9606 GN=HNRNPH3 PE=1 SV=2	0	58.187	37	9	40	8	36.9	6.87	101.06	6.27	HNRNPH3
High	IsMasterProtein	O00303	Eukaryotic translation initiation factor 3 subunit F OS=Homo sapiens OX=9606 GN=EIF3F PE=1 SV=1	0	57.156	29	8	31	8	37.5	5.45	59.8	6.24	EIF3F
High	IsMasterProtein	P62269	40S ribosomal protein S18 OS=Homo sapiens OX=9606 GN=RPS18 PE=1 SV=3	0	76.17	55	14	105	14	17.7	10.99	270.77	6.239	RPS18
High	IsMasterProtein	Q14974	Importin subunit beta-1 OS=Homo sapiens OX=9606 GN=KPNB1 PE=1 SV=2	0	265.287	46	30	197	30	97.1	4.78	522.42	6.219	KPNB1
High	IsMasterProtein	Q16543	Hsp90 co-chaperone Cdc37 OS=Homo sapiens OX=9606 GN=CDC37 PE=1 SV=1	0	52.563	25	8	31	8	44.4	5.25	84.04	6.217	CDC37
High	IsMasterProtein	Q2TAY7	WD40 repeat-containing protein SMU1 OS=Homo sapiens OX=9606 GN=SMU1 PE=1 SV=2	0	40.728	17	6	15	6	57.5	7.18	43.52	6.205	SMU1
High	IsMasterProtein	Q9UKN8	General transcription factor 3C polypeptide 4 OS=Homo sapiens OX=9606 GN=GTF3C4 PE=1 SV=2	0	58.853	15	7	16	7	91.9	6.65	48.25	6.204	GTF3C4
High	IsMasterProtein	O76003	Glutaredoxin-3 OS=Homo sapiens OX=9606 GN=GLRX3 PE=1 SV=2	0	53.693	39	10	29	10	37.4	5.39	84.79	6.156	GLRX3
High	IsMasterProtein	Q15365	Poly(rC)-binding protein 1 OS=Homo sapiens OX=9606 GN=PCBP1 PE=1 SV=2	0	147.571	61	13	91	10	37.5	7.09	300.05	6.151	PCBP1
High	IsMasterProtein	P62195	26S proteasome regulatory subunit 8 OS=Homo sapiens OX=9606 GN=PSMC5 PE=1 SV=1	0	73.064	34	10	42	8	45.6	7.55	116.76	6.147	PSMC5
High	IsMasterProtein	P98179	RNA-binding protein 3 OS=Homo sapiens OX=9606 GN=RBM3 PE=1 SV=1	0	54.39	48	4	35	4	17.2	8.91	99.18	6.106	RBM3
High	IsMasterProtein	Q15029	116 kDa U5 small nuclear ribonucleoprotein component OS=Homo sapiens OX=9606 GN=EFTUD2 PE=1 SV=1	0	348.33	51	35	177	34	109.4	5	511.59	6.105	EFTUD2
High	IsMasterProtein	Q9UQ35	Serine/arginine repetitive matrix protein 2 OS=Homo sapiens OX=9606 GN=SRRM2 PE=1 SV=2	0	377.909	22	41	161	41	299.4	12.06	536.06	6.099	SRRM2
High	IsMasterProtein	Q5SSJ5	Heterochromatin protein 1-binding protein 3 OS=Homo sapiens OX=9606 GN=HP1BP3 PE=1 SV=1	0	28.38	11	4	17	4	61.2	9.67	36.27	6.091	HP1BP3
High	IsMasterProtein	P53992	Protein transport protein Sec24C OS=Homo sapiens OX=9606 GN=SEC24C PE=1 SV=3	0	44.25	11	9	19	9	118.2	7.06	31.47	6.061	SEC24C
High	IsMasterProtein	P22087	rRNA 2'-O-methyltransferase fibrillarin OS=Homo sapiens OX=9606 GN=FBL PE=1 SV=2	0	37.847	23	6	19	6	33.8	10.18	60.26	6.06	FBL
High	IsMasterProtein	Q9NZM1	Myoferlin OS=Homo sapiens OX=9606 GN=MYOF PE=1 SV=1	0	15.745	3	3	3	3	234.6	6.18	7.35	6.052	MYOF
High	IsMasterProtein	O76094	Signal recognition particle subunit SRP72 OS=Homo sapiens OX=9606 GN=SRP72 PE=1 SV=3	0	57.573	15	7	23	7	74.6	9.26	52.95	6.04	SRP72
High	IsMasterProtein	P06576	ATP synthase subunit beta, mitochondrial OS=Homo sapiens OX=9606 GN=ATP5F1B PE=1 SV=3	0	365.282	71	24	205	24	56.5	5.4	635.43	6.036	ATP5B
High	IsMasterProtein	Q14566	DNA replication licensing factor MCM6 OS=Homo sapiens OX=9606 GN=MCM6 PE=1 SV=1	0	160.932	31	20	72	20	92.8	5.41	212.88	6.036	MCM6
High	IsMasterProtein	Q15717	ELAV-like protein 1 OS=Homo sapiens OX=9606 GN=ELAVL1 PE=1 SV=2	0	62.436	33	9	31	9	36.1	9.17	102.3	6.029	ELAVL1
High	IsMasterProtein	P62191	26S proteasome regulatory subunit 4 OS=Homo sapiens OX=9606 GN=PSMC1 PE=1 SV=1	0	118.834	45	15	48	13	49.2	6.21	141.27	6.028	PSMC1
High	IsMasterProtein	Q13636	Ras-related protein Rab-31 OS=Homo sapiens OX=9606 GN=RAB31 PE=1 SV=1	0	16.255	13	2	7	2	21.6	7.06	15.34	6.028	RAB31
High	IsMasterProtein	Q12874	Splicing factor 3A subunit 3 OS=Homo sapiens OX=9606 GN=SF3A3 PE=1 SV=1	0	97.982	40	13	33	13	58.8	5.38	102.44	6.025	SF3A3
High	IsMasterProtein	Q14126	Desmoglein-2 OS=Homo sapiens OX=9606 GN=DSG2 PE=1 SV=2	0	12.616	5	3	7	3	122.2	5.24	8.84	6.024	DSG2
High	IsMasterProtein	Q9BXP5	Serrate RNA effector molecule homolog OS=Homo sapiens OX=9606 GN=SRRT PE=1 SV=1	0	108.028	31	21	52	21	100.6	5.96	135.28	6.02	SRRT
High	IsMasterProtein	O75323	Protein NipSnap homolog 2 OS=Homo sapiens OX=9606 GN=NIPSNAP2 PE=1 SV=1	0	9.672	9	2	5	2	33.7	9.36	6.88	6.008	GBAS; NIPSNAP2
High	IsMasterProtein	P62263	40S ribosomal protein S14 OS=Homo sapiens OX=9606 GN=RPS14 PE=1 SV=3	0	177.264	70	12	134	12	16.3	10.05	429.64	6.003	RPS14
High	IsMasterProtein	P53396	ATP-citrate synthase OS=Homo sapiens OX=9606 GN=ACLY PE=1 SV=3	0	271.007	35	33	155	33	120.8	7.33	418.19	5.992	ACLY
High	IsMasterProtein	O14979	Heterogeneous nuclear ribonucleoprotein D-like OS=Homo sapiens OX=9606 GN=HNRNPDL PE=1 SV=3	0	73.207	25	11	57	8	46.4	9.57	124.56	5.992	HNRNPDL; HNRPDL
High	IsMasterProtein	Q9NUQ9	Protein FAM49B OS=Homo sapiens OX=9606 GN=FAM49B PE=1 SV=1	0	36.308	18	4	14	4	36.7	6.06	40.43	5.977	FAM49B
High	IsMasterProtein	O75439	Mitochondrial-processing peptidase subunit beta OS=Homo sapiens OX=9606 GN=PMPCB PE=1 SV=2	0	34.345	16	5	12	5	54.3	6.83	33.73	5.976	PMPCB
High	IsMasterProtein	Q7L5N1	COP9 signalosome complex subunit 6 OS=Homo sapiens OX=9606 GN=COPS6 PE=1 SV=1	0	19.638	19	4	8	4	36.1	5.73	25.3	5.967	COPS6
High	IsMasterProtein	P39748	Flap endonuclease 1 OS=Homo sapiens OX=9606 GN=FEN1 PE=1 SV=1	0	138.58	47	11	105	11	42.6	8.62	348.18	5.964	FEN1
High	IsMasterProtein	P13804	Electron transfer flavoprotein subunit alpha, mitochondrial OS=Homo sapiens OX=9606 GN=ETFA PE=1 SV=1	0	85.228	45	10	52	10	35.1	8.38	133.03	5.962	ETFA
High	IsMasterProtein	Q14978	Nucleolar and coiled-body phosphoprotein 1 OS=Homo sapiens OX=9606 GN=NOLC1 PE=1 SV=2	0	212.912	41	23	121	23	73.6	9.47	369.6	5.953	NOLC1
High	IsMasterProtein	P51812	Ribosomal protein S6 kinase alpha-3 OS=Homo sapiens OX=9606 GN=RPS6KA3 PE=1 SV=1	0	36.97	11	7	14	5	83.7	6.89	38.38	5.948	RPS6KA3
High	IsMasterProtein	P42285	Exosome RNA helicase MTR4 OS=Homo sapiens OX=9606 GN=MTREX PE=1 SV=3	0	47.664	10	8	23	8	117.7	6.52	44.16	5.939	SKIV2L2
High	IsMasterProtein	P35244	Replication protein A 14 kDa subunit OS=Homo sapiens OX=9606 GN=RPA3 PE=1 SV=1	0	44.521	49	3	13	3	13.6	5.08	36.39	5.938	RPA3
High	IsMasterProtein	P52294	Importin subunit alpha-5 OS=Homo sapiens OX=9606 GN=KPNA1 PE=1 SV=3	0	24.166	10	5	12	1	60.2	5.01	25.89	5.937	KPNA1
High	IsMasterProtein	P78371	T-complex protein 1 subunit beta OS=Homo sapiens OX=9606 GN=CCT2 PE=1 SV=4	0	323.494	64	30	170	30	57.5	6.46	547.4	5.934	CCT2
High	IsMasterProtein	Q9HD33	39S ribosomal protein L47, mitochondrial OS=Homo sapiens OX=9606 GN=MRPL47 PE=1 SV=2	0	25.744	22	4	7	4	29.4	10.37	17.84	5.901	MRPL47
High	IsMasterProtein	Q8WWY3	U4/U6 small nuclear ribonucleoprotein Prp31 OS=Homo sapiens OX=9606 GN=PRPF31 PE=1 SV=2	0	21.937	11	3	7	3	55.4	5.78	23.9	5.88	PRPF31
High	IsMasterProtein	O43837	Isocitrate dehydrogenase [NAD] subunit beta, mitochondrial OS=Homo sapiens OX=9606 GN=IDH3B PE=1 SV=2	0	28.918	14	4	8	4	42.2	8.46	16.65	5.872	IDH3B
High	IsMasterProtein	Q96EK6	Glucosamine 6-phosphate N-acetyltransferase OS=Homo sapiens OX=9606 GN=GNPNAT1 PE=1 SV=1	0	40.688	49	5	20	5	20.7	7.99	69.64	5.848	GNPNAT1
High	IsMasterProtein	Q92905	COP9 signalosome complex subunit 5 OS=Homo sapiens OX=9606 GN=COPS5 PE=1 SV=4	0	16.479	16	3	5	3	37.6	6.54	15.03	5.831	COPS5
High	IsMasterProtein	P36578	60S ribosomal protein L4 OS=Homo sapiens OX=9606 GN=RPL4 PE=1 SV=5	0	370.74	58	31	311	31	47.7	11.06	997.64	5.825	RPL4
High	IsMasterProtein	P62333	26S proteasome regulatory subunit 10B OS=Homo sapiens OX=9606 GN=PSMC6 PE=1 SV=1	0	95.939	52	14	53	14	44.1	7.49	152.19	5.811	PSMC6
High	IsMasterProtein	Q00534	Cyclin-dependent kinase 6 OS=Homo sapiens OX=9606 GN=CDK6 PE=1 SV=1	0	16.722	12	3	11	2	36.9	6.46	16.23	5.802	CDK6
High	IsMasterProtein	P56537	Eukaryotic translation initiation factor 6 OS=Homo sapiens OX=9606 GN=EIF6 PE=1 SV=1	0	54.115	33	5	25	5	26.6	4.68	67.66	5.801	EIF6
High	IsMasterProtein	Q8N6H7	ADP-ribosylation factor GTPase-activating protein 2 OS=Homo sapiens OX=9606 GN=ARFGAP2 PE=1 SV=1	0	13.567	7	2	6	2	56.7	7.99	19.91	5.793	ARFGAP2
High	IsMasterProtein	P50914	60S ribosomal protein L14 OS=Homo sapiens OX=9606 GN=RPL14 PE=1 SV=4	0	63.744	37	9	136	9	23.4	10.93	321.16	5.789	RPL14
High	IsMasterProtein	Q9BXS6	Nucleolar and spindle-associated protein 1 OS=Homo sapiens OX=9606 GN=NUSAP1 PE=1 SV=1	0	18.206	9	3	5	3	49.4	9.91	18.75	5.783	NUSAP1
High	IsMasterProtein	P15531	Nucleoside diphosphate kinase A OS=Homo sapiens OX=9606 GN=NME1 PE=1 SV=1	0	106.128	70	10	97	5	17.1	6.19	252.68	5.775	NME1
High	IsMasterProtein	Q86UY6	N-alpha-acetyltransferase 40 OS=Homo sapiens OX=9606 GN=NAA40 PE=1 SV=1	0	32.275	14	3	14	3	27.2	7.39	32.9	5.774	NAA40
High	IsMasterProtein	O95831	Apoptosis-inducing factor 1, mitochondrial OS=Homo sapiens OX=9606 GN=AIFM1 PE=1 SV=1	0	28.922	12	5	11	5	66.9	8.95	30.15	5.758	AIFM1
High	IsMasterProtein	Q16698	2,4-dienoyl-CoA reductase, mitochondrial OS=Homo sapiens OX=9606 GN=DECR1 PE=1 SV=1	0	12.496	15	4	11	4	36	9.28	17.14	5.75	DECR1
High	IsMasterProtein	P35659	Protein DEK OS=Homo sapiens OX=9606 GN=DEK PE=1 SV=1	0	73.314	31	10	39	10	42.6	8.56	105.79	5.748	DEK
High	IsMasterProtein	Q8NBF2	NHL repeat-containing protein 2 OS=Homo sapiens OX=9606 GN=NHLRC2 PE=1 SV=1	0	5.472	3	2	4	2	79.4	5.55	9.6	5.747	NHLRC2
High	IsMasterProtein	P02786	Transferrin receptor protein 1 OS=Homo sapiens OX=9606 GN=TFRC PE=1 SV=2	0	117.33	27	17	73	17	84.8	6.61	192.56	5.737	TFRC
High	IsMasterProtein	Q9Y2W1	Thyroid hormone receptor-associated protein 3 OS=Homo sapiens OX=9606 GN=THRAP3 PE=1 SV=2	0	149.624	19	13	74	13	108.6	10.15	247.3	5.734	THRAP3
High	IsMasterProtein	Q06323	Proteasome activator complex subunit 1 OS=Homo sapiens OX=9606 GN=PSME1 PE=1 SV=1	0	62.733	39	11	39	11	28.7	6.02	103.76	5.729	PSME1
High	IsMasterProtein	Q58FF6	Putative heat shock protein HSP 90-beta 4 OS=Homo sapiens OX=9606 GN=HSP90AB4P PE=5 SV=1	0	90.638	15	9	96	2	58.2	4.73	252.93	5.728	HSP90AB4P
High	IsMasterProtein	P46779	60S ribosomal protein L28 OS=Homo sapiens OX=9606 GN=RPL28 PE=1 SV=3	0	58.782	46	11	65	11	15.7	12.02	138.35	5.725	RPL28
High	IsMasterProtein	P26373	60S ribosomal protein L13 OS=Homo sapiens OX=9606 GN=RPL13 PE=1 SV=4	0	108.712	54	14	119	14	24.2	11.65	297.22	5.719	RPL13
High	IsMasterProtein	Q9BS26	Endoplasmic reticulum resident protein 44 OS=Homo sapiens OX=9606 GN=ERP44 PE=1 SV=1	0	4.339	4	2	5	1	46.9	5.26	1.7	5.715	ERP44
High	IsMasterProtein	P61163	Alpha-centractin OS=Homo sapiens OX=9606 GN=ACTR1A PE=1 SV=1	0	94.609	38	7	29	4	42.6	6.64	101.66	5.71	ACTR1A
High	IsMasterProtein	Q14839	Chromodomain-helicase-DNA-binding protein 4 OS=Homo sapiens OX=9606 GN=CHD4 PE=1 SV=2	0	140.339	14	19	51	16	217.9	5.86	135.49	5.702	CHD4
High	IsMasterProtein	Q9NUU7	ATP-dependent RNA helicase DDX19A OS=Homo sapiens OX=9606 GN=DDX19A PE=1 SV=1	0	81.026	23	8	26	2	53.9	6.58	95.55	5.695	DDX19A
High	IsMasterProtein	P25705	ATP synthase subunit alpha, mitochondrial OS=Homo sapiens OX=9606 GN=ATP5F1A PE=1 SV=1	0	237.336	57	27	163	27	59.7	9.13	451.98	5.689	ATP5A1
High	IsMasterProtein	Q07020	60S ribosomal protein L18 OS=Homo sapiens OX=9606 GN=RPL18 PE=1 SV=2	0	78.746	51	10	107	10	21.6	11.72	327.56	5.688	RPL18
High	IsMasterProtein	P98175	RNA-binding protein 10 OS=Homo sapiens OX=9606 GN=RBM10 PE=1 SV=3	0	15.522	6	3	5	3	103.5	5.97	12.12	5.667	RBM10
High	IsMasterProtein	P60228	Eukaryotic translation initiation factor 3 subunit E OS=Homo sapiens OX=9606 GN=EIF3E PE=1 SV=1	0	53.777	30	11	39	11	52.2	6.04	84.91	5.666	EIF3E
High	IsMasterProtein	P42224	Signal transducer and activator of transcription 1-alpha/beta OS=Homo sapiens OX=9606 GN=STAT1 PE=1 SV=2	0	21.167	6	3	8	3	87.3	6.05	26.05	5.663	STAT1
High	IsMasterProtein	P41223	Protein BUD31 homolog OS=Homo sapiens OX=9606 GN=BUD31 PE=1 SV=2	0	69.791	50	7	33	7	17	8.82	92.73	5.635	BUD31
High	IsMasterProtein	P11413	Glucose-6-phosphate 1-dehydrogenase OS=Homo sapiens OX=9606 GN=G6PD PE=1 SV=4	0	138.131	49	19	73	19	59.2	6.84	200.79	5.626	G6PD
High	IsMasterProtein	Q14738	Serine/threonine-protein phosphatase 2A 56 kDa regulatory subunit delta isoform OS=Homo sapiens OX=9606 GN=PPP2R5D PE=1 SV=1	0	45.589	20	8	21	5	69.9	8.13	54.53	5.582	PPP2R5D
High	IsMasterProtein	P29144	Tripeptidyl-peptidase 2 OS=Homo sapiens OX=9606 GN=TPP2 PE=1 SV=4	0	39.106	8	8	14	8	138.3	6.32	36.33	5.573	TPP2
High	IsMasterProtein	P62854	40S ribosomal protein S26 OS=Homo sapiens OX=9606 GN=RPS26 PE=1 SV=3	0	60.034	44	4	77	4	13	11	190.28	5.57	RPS26; LOC101929876; RPS26P25
High	IsMasterProtein	O60306	RNA helicase aquarius OS=Homo sapiens OX=9606 GN=AQR PE=1 SV=4	0	21.501	3	3	7	3	171.2	6.37	25.58	5.554	AQR
High	IsMasterProtein	Q5U5X0	Complex III assembly factor LYRM7 OS=Homo sapiens OX=9606 GN=LYRM7 PE=1 SV=1	0	5.468	15	2	4	2	11.9	9.66	0	5.554	LYRM7
High	IsMasterProtein	Q9ULC4	Malignant T-cell-amplified sequence 1 OS=Homo sapiens OX=9606 GN=MCTS1 PE=1 SV=1	0	48.934	46	5	34	5	20.5	8.82	71.37	5.543	MCTS1
High	IsMasterProtein	Q9NZI8	Insulin-like growth factor 2 mRNA-binding protein 1 OS=Homo sapiens OX=9606 GN=IGF2BP1 PE=1 SV=2	0	47.106	12	5	14	4	63.4	9.2	44.53	5.52	IGF2BP1
High	IsMasterProtein	Q9H3N1	Thioredoxin-related transmembrane protein 1 OS=Homo sapiens OX=9606 GN=TMX1 PE=1 SV=1	0	18.465	17	5	9	5	31.8	4.98	20.7	5.52	TMX1
High	IsMasterProtein	P35270	Sepiapterin reductase OS=Homo sapiens OX=9606 GN=SPR PE=1 SV=1	0	75.701	39	7	28	7	28	8.05	76.22	5.497	SPR
High	IsMasterProtein	P39023	60S ribosomal protein L3 OS=Homo sapiens OX=9606 GN=RPL3 PE=1 SV=2	0	287.38	59	30	231	30	46.1	10.18	670.09	5.494	RPL3
High	IsMasterProtein	Q9UQE7	Structural maintenance of chromosomes protein 3 OS=Homo sapiens OX=9606 GN=SMC3 PE=1 SV=2	0	239.032	32	31	105	31	141.5	7.18	311.57	5.494	SMC3
High	IsMasterProtein	P26599	Polypyrimidine tract-binding protein 1 OS=Homo sapiens OX=9606 GN=PTBP1 PE=1 SV=1	0	207.674	50	18	131	18	57.2	9.17	397.91	5.49	PTBP1
High	IsMasterProtein	Q9H7E9	UPF0488 protein C8orf33 OS=Homo sapiens OX=9606 GN=C8orf33 PE=1 SV=1	0	20.931	19	4	13	4	25	9.95	34.68	5.488	C8orf33
High	IsMasterProtein	Q9H2U2	Inorganic pyrophosphatase 2, mitochondrial OS=Homo sapiens OX=9606 GN=PPA2 PE=1 SV=2	0	84.902	51	12	40	11	37.9	7.39	89.95	5.485	PPA2
High	IsMasterProtein	P62701	40S ribosomal protein S4, X isoform OS=Homo sapiens OX=9606 GN=RPS4X PE=1 SV=2	0	190.436	72	24	240	24	29.6	10.15	607.37	5.464	RPS4X
High	IsMasterProtein	Q09161	Nuclear cap-binding protein subunit 1 OS=Homo sapiens OX=9606 GN=NCBP1 PE=1 SV=1	0	43.016	12	6	16	6	91.8	6.43	47.83	5.447	NCBP1
High	IsMasterProtein	Q9BR76	Coronin-1B OS=Homo sapiens OX=9606 GN=CORO1B PE=1 SV=1	0	40.56	20	5	9	5	54.2	5.88	35.14	5.429	CORO1B
High	IsMasterProtein	Q9Y696	Chloride intracellular channel protein 4 OS=Homo sapiens OX=9606 GN=CLIC4 PE=1 SV=4	0	33.625	27	4	17	3	28.8	5.59	38.53	5.427	CLIC4
High	IsMasterProtein	Q13619	Cullin-4A OS=Homo sapiens OX=9606 GN=CUL4A PE=1 SV=3	0	44.483	15	8	27	5	87.6	8.13	63.25	5.418	CUL4A
High	IsMasterProtein	Q9H4A4	Aminopeptidase B OS=Homo sapiens OX=9606 GN=RNPEP PE=1 SV=2	0	123.709	43	18	55	18	72.5	5.74	151.13	5.416	RNPEP
High	IsMasterProtein	P55209	Nucleosome assembly protein 1-like 1 OS=Homo sapiens OX=9606 GN=NAP1L1 PE=1 SV=1	0	125.605	33	12	65	10	45.3	4.46	179.66	5.387	NAP1L1
High	IsMasterProtein	P00966	Argininosuccinate synthase OS=Homo sapiens OX=9606 GN=ASS1 PE=1 SV=2	0	230.507	58	23	165	23	46.5	8.02	511.68	5.376	ASS1
High	IsMasterProtein	O95394	Phosphoacetylglucosamine mutase OS=Homo sapiens OX=9606 GN=PGM3 PE=1 SV=1	0	23.957	15	4	9	4	59.8	6.25	19.77	5.363	PGM3
High	IsMasterProtein	O00148	ATP-dependent RNA helicase DDX39A OS=Homo sapiens OX=9606 GN=DDX39A PE=1 SV=2	0	109.481	36	15	83	5	49.1	5.68	201.78	5.342	DDX39A
High	IsMasterProtein	Q14137	Ribosome biogenesis protein BOP1 OS=Homo sapiens OX=9606 GN=BOP1 PE=1 SV=2	0	28.418	11	5	9	5	83.6	6.19	22.27	5.336	BOP1
High	IsMasterProtein	Q9H3P2	Negative elongation factor A OS=Homo sapiens OX=9606 GN=NELFA PE=1 SV=3	0	8.757	5	2	3	2	57.2	9.03	7.85	5.332	NELFA; WHSC2
High	IsMasterProtein	O00541	Pescadillo homolog OS=Homo sapiens OX=9606 GN=PES1 PE=1 SV=1	0	39.992	17	7	15	7	68	7.33	37.36	5.33	PES1
High	IsMasterProtein	Q13838	Spliceosome RNA helicase DDX39B OS=Homo sapiens OX=9606 GN=DDX39B PE=1 SV=1	0	147.249	44	18	100	8	49	5.67	252.37	5.328	DDX39B
High	IsMasterProtein	Q9UH65	Switch-associated protein 70 OS=Homo sapiens OX=9606 GN=SWAP70 PE=1 SV=1	0	47.877	13	5	10	5	69	5.87	25.26	5.303	SWAP70
High	IsMasterProtein	P68402	Platelet-activating factor acetylhydrolase IB subunit beta OS=Homo sapiens OX=9606 GN=PAFAH1B2 PE=1 SV=1	0	13.834	12	2	7	2	25.6	5.92	23.6	5.303	PAFAH1B2
High	IsMasterProtein	Q99615	DnaJ homolog subfamily C member 7 OS=Homo sapiens OX=9606 GN=DNAJC7 PE=1 SV=2	0	64.456	18	8	23	8	56.4	6.96	80.61	5.279	DNAJC7
High	IsMasterProtein	Q969U7	Proteasome assembly chaperone 2 OS=Homo sapiens OX=9606 GN=PSMG2 PE=1 SV=1	0	7.385	9	2	16	2	29.4	6.98	8.64	5.277	PSMG2
High	IsMasterProtein	Q9NQZ2	Something about silencing protein 10 OS=Homo sapiens OX=9606 GN=UTP3 PE=1 SV=1	0	19.28	10	3	7	3	54.5	5.62	17.43	5.268	UTP3
High	IsMasterProtein	P49959	Double-strand break repair protein MRE11 OS=Homo sapiens OX=9606 GN=MRE11 PE=1 SV=3	0	35.804	13	5	14	5	80.5	5.9	34.13	5.266	MRE11A; MRE11
High	IsMasterProtein	P52948	Nuclear pore complex protein Nup98-Nup96 OS=Homo sapiens OX=9606 GN=NUP98 PE=1 SV=4	0	21.066	3	3	7	3	197.5	6.4	12.5	5.259	NUP98
High	IsMasterProtein	Q7L1Q6	Basic leucine zipper and W2 domain-containing protein 1 OS=Homo sapiens OX=9606 GN=BZW1 PE=1 SV=1	0	83.009	42	16	59	13	48	5.92	130.24	5.257	BZW1
High	IsMasterProtein	P31943	Heterogeneous nuclear ribonucleoprotein H OS=Homo sapiens OX=9606 GN=HNRNPH1 PE=1 SV=4	0	185.777	49	16	126	7	49.2	6.3	382.14	5.256	HNRNPH1
High	IsMasterProtein	Q14240	Eukaryotic initiation factor 4A-II OS=Homo sapiens OX=9606 GN=EIF4A2 PE=1 SV=2	0	92.655	34	13	117	1	46.4	5.48	251.39	5.251	EIF4A2
High	IsMasterProtein	Q7Z2W9	39S ribosomal protein L21, mitochondrial OS=Homo sapiens OX=9606 GN=MRPL21 PE=1 SV=2	0	13.825	14	2	5	2	22.8	9.89	14.46	5.236	MRPL21
High	IsMasterProtein	Q9P287	BRCA2 and CDKN1A-interacting protein OS=Homo sapiens OX=9606 GN=BCCIP PE=1 SV=1	0	56.788	34	7	27	7	36	4.61	87.47	5.218	BCCIP
High	IsMasterProtein	P30153	Serine/threonine-protein phosphatase 2A 65 kDa regulatory subunit A alpha isoform OS=Homo sapiens OX=9606 GN=PPP2R1A PE=1 SV=4	0	206.853	43	19	102	16	65.3	5.11	264.43	5.216	PPP2R1A
High	IsMasterProtein	P62753	40S ribosomal protein S6 OS=Homo sapiens OX=9606 GN=RPS6 PE=1 SV=1	0	179.347	39	13	168	13	28.7	10.84	498.73	5.214	RPS6
High	IsMasterProtein	O14579	Coatomer subunit epsilon OS=Homo sapiens OX=9606 GN=COPE PE=1 SV=3	0	35.664	20	4	9	4	34.5	5.12	20.96	5.209	COPE
High	IsMasterProtein	Q9UKV3	Apoptotic chromatin condensation inducer in the nucleus OS=Homo sapiens OX=9606 GN=ACIN1 PE=1 SV=2	0	113.714	16	13	41	13	151.8	6.43	119.3	5.207	ACIN1
High	IsMasterProtein	Q15181	Inorganic pyrophosphatase OS=Homo sapiens OX=9606 GN=PPA1 PE=1 SV=2	0	158.846	76	18	77	17	32.6	5.86	227.9	5.196	PPA1
High	IsMasterProtein	Q9UHX1	Poly(U)-binding-splicing factor PUF60 OS=Homo sapiens OX=9606 GN=PUF60 PE=1 SV=1	0	80.391	24	8	42	8	59.8	5.29	121.84	5.189	PUF60
High	IsMasterProtein	Q69YN2	CWF19-like protein 1 OS=Homo sapiens OX=9606 GN=CWF19L1 PE=1 SV=2	0	8.314	4	2	3	2	60.6	7.24	2.95	5.188	CWF19L1
High	IsMasterProtein	P07355	Annexin A2 OS=Homo sapiens OX=9606 GN=ANXA2 PE=1 SV=2	0	198.49	55	22	124	22	38.6	7.75	356.89	5.184	ANXA2
High	IsMasterProtein	Q9BT78	COP9 signalosome complex subunit 4 OS=Homo sapiens OX=9606 GN=COPS4 PE=1 SV=1	0	43.79	22	6	15	6	46.2	5.83	37.45	5.182	COPS4
High	IsMasterProtein	O75915	PRA1 family protein 3 OS=Homo sapiens OX=9606 GN=ARL6IP5 PE=1 SV=1	0	36.226	19	4	14	4	21.6	9.77	39.58	5.182	ARL6IP5
High	IsMasterProtein	O75531	Barrier-to-autointegration factor OS=Homo sapiens OX=9606 GN=BANF1 PE=1 SV=1	0	6.511	35	2	6	2	10.1	6.09	7.07	5.181	BANF1
High	IsMasterProtein	Q13509	Tubulin beta-3 chain OS=Homo sapiens OX=9606 GN=TUBB3 PE=1 SV=2	0	282.841	41	18	339	2	50.4	4.93	978.89	5.178	TUBB3
High	IsMasterProtein	P43490	Nicotinamide phosphoribosyltransferase OS=Homo sapiens OX=9606 GN=NAMPT PE=1 SV=1	0	153.58	55	20	67	20	55.5	7.15	173.57	5.177	NAMPT
High	IsMasterProtein	P05386	60S acidic ribosomal protein P1 OS=Homo sapiens OX=9606 GN=RPLP1 PE=1 SV=1	0	38.797	67	3	25	2	11.5	4.32	65.82	5.172	RPLP1
High	IsMasterProtein	P18085	ADP-ribosylation factor 4 OS=Homo sapiens OX=9606 GN=ARF4 PE=1 SV=3	0	55.371	53	8	24	4	20.5	7.14	78.9	5.168	ARF4
High	IsMasterProtein	Q5VW32	BRO1 domain-containing protein BROX OS=Homo sapiens OX=9606 GN=BROX PE=1 SV=1	0	13.515	7	2	6	2	46.4	7.65	19.97	5.159	BROX
High	IsMasterProtein	Q9NZ45	CDGSH iron-sulfur domain-containing protein 1 OS=Homo sapiens OX=9606 GN=CISD1 PE=1 SV=1	0	10.334	34	3	4	3	12.2	9.09	9	5.158	CISD1
High	IsMasterProtein	O95983	Methyl-CpG-binding domain protein 3 OS=Homo sapiens OX=9606 GN=MBD3 PE=1 SV=1	0	13.946	5	2	5	2	32.8	5.34	11.58	5.153	MBD3
High	IsMasterProtein	O00232	26S proteasome non-ATPase regulatory subunit 12 OS=Homo sapiens OX=9606 GN=PSMD12 PE=1 SV=3	0	92.409	34	11	38	11	52.9	7.65	110.96	5.152	PSMD12
High	IsMasterProtein	O43252	Bifunctional 3'-phosphoadenosine 5'-phosphosulfate synthase 1 OS=Homo sapiens OX=9606 GN=PAPSS1 PE=1 SV=2	0	32.706	9	3	10	3	70.8	6.86	30.7	5.144	PAPSS1
High	IsMasterProtein	O00507	Probable ubiquitin carboxyl-terminal hydrolase FAF-Y OS=Homo sapiens OX=9606 GN=USP9Y PE=2 SV=2	0.001	3.302	1	2	2	2	290.9	5.86	1.68	5.127	USP9Y
High	IsMasterProtein	P34896	Serine hydroxymethyltransferase, cytosolic OS=Homo sapiens OX=9606 GN=SHMT1 PE=1 SV=1	0	75.849	31	11	44	10	53	7.71	106.19	5.117	SHMT1
High	IsMasterProtein	P61313	60S ribosomal protein L15 OS=Homo sapiens OX=9606 GN=RPL15 PE=1 SV=2	0	82.004	48	9	83	9	24.1	11.62	244.37	5.114	RPL15
High	IsMasterProtein	P26641	Elongation factor 1-gamma OS=Homo sapiens OX=9606 GN=EEF1G PE=1 SV=3	0	247.845	64	24	227	24	50.1	6.67	702.68	5.109	EEF1G
High	IsMasterProtein	Q99873	Protein arginine N-methyltransferase 1 OS=Homo sapiens OX=9606 GN=PRMT1 PE=1 SV=3	0	123.03	43	15	60	15	42.4	5.35	182.26	5.102
High	IsMasterProtein	P12004	Proliferating cell nuclear antigen OS=Homo sapiens OX=9606 GN=PCNA PE=1 SV=1	0	118.32	70	14	85	14	28.8	4.69	260.36	5.094	PCNA
High	IsMasterProtein	Q9H074	Polyadenylate-binding protein-interacting protein 1 OS=Homo sapiens OX=9606 GN=PAIP1 PE=1 SV=1	0	8.274	4	2	3	2	53.5	4.81	6.46	5.088	PAIP1
High	IsMasterProtein	Q9Y5K5	Ubiquitin carboxyl-terminal hydrolase isozyme L5 OS=Homo sapiens OX=9606 GN=UCHL5 PE=1 SV=3	0	54.335	26	7	23	7	37.6	5.33	63.09	5.087	UCHL5
High	IsMasterProtein	P38646	Stress-70 protein, mitochondrial OS=Homo sapiens OX=9606 GN=HSPA9 PE=1 SV=2	0	206.213	37	20	109	20	73.6	6.16	336.55	5.074	HSPA9
High	IsMasterProtein	P26358	DNA (cytosine-5)-methyltransferase 1 OS=Homo sapiens OX=9606 GN=DNMT1 PE=1 SV=2	0	76.769	11	14	35	14	183.1	7.75	109.08	5.069	DNMT1
High	IsMasterProtein	P19623	Spermidine synthase OS=Homo sapiens OX=9606 GN=SRM PE=1 SV=1	0	100.76	64	12	40	12	33.8	5.49	135.98	5.059	SRM
High	IsMasterProtein	P62280	40S ribosomal protein S11 OS=Homo sapiens OX=9606 GN=RPS11 PE=1 SV=3	0	82.856	58	13	121	13	18.4	10.3	281.33	5.049	RPS11
High	IsMasterProtein	O43290	U4/U6.U5 tri-snRNP-associated protein 1 OS=Homo sapiens OX=9606 GN=SART1 PE=1 SV=1	0	104.392	28	15	46	15	90.2	6.13	132.76	5.038	SART1
High	IsMasterProtein	P63244	Receptor of activated protein C kinase 1 OS=Homo sapiens OX=9606 GN=RACK1 PE=1 SV=3	0	247.195	76	18	167	18	35.1	7.69	548.36	5.037	GNB2L1; RACK1
High	IsMasterProtein	Q8WUM4	Programmed cell death 6-interacting protein OS=Homo sapiens OX=9606 GN=PDCD6IP PE=1 SV=1	0	199.136	44	26	98	26	96	6.52	210.98	5.037	PDCD6IP
High	IsMasterProtein	P18621	60S ribosomal protein L17 OS=Homo sapiens OX=9606 GN=RPL17 PE=1 SV=3	0	143.965	58	13	172	13	21.4	10.17	460.33	5.031	RPL17
High	IsMasterProtein	P51114	Fragile X mental retardation syndrome-related protein 1 OS=Homo sapiens OX=9606 GN=FXR1 PE=1 SV=3	0	36.016	11	6	16	5	69.7	6.15	31.34	5.027	FXR1
High	IsMasterProtein	P36952	Serpin B5 OS=Homo sapiens OX=9606 GN=SERPINB5 PE=1 SV=2	0	223.97	74	21	162	21	42.1	6.05	417.59	5.024	SERPINB5
High	IsMasterProtein	Q14241	Elongin-A OS=Homo sapiens OX=9606 GN=ELOA PE=1 SV=2	0	13.833	5	2	2	2	89.9	9.57	6.74	5.012	TCEB3; ELOA
High	IsMasterProtein	Q9Y388	RNA-binding motif protein, X-linked 2 OS=Homo sapiens OX=9606 GN=RBMX2 PE=1 SV=2	0	8.461	6	2	2	2	37.3	9.83	5.24	4.99	RBMX2
High	IsMasterProtein	Q6NZI2	Caveolae-associated protein 1 OS=Homo sapiens OX=9606 GN=CAVIN1 PE=1 SV=1	0	34.868	16	4	8	4	43.5	5.6	31.83	4.979	PTRF; CAVIN1
High	IsMasterProtein	P18077	60S ribosomal protein L35a OS=Homo sapiens OX=9606 GN=RPL35A PE=1 SV=2	0	27.834	34	6	39	6	12.5	11.06	80.51	4.977	RPL35A
High	IsMasterProtein	P04818	Thymidylate synthase OS=Homo sapiens OX=9606 GN=TYMS PE=1 SV=3	0	12.506	8	2	6	2	35.7	7.01	15.81	4.971	TYMS
High	IsMasterProtein	P46459	Vesicle-fusing ATPase OS=Homo sapiens OX=9606 GN=NSF PE=1 SV=3	0	4.018	2	2	3	2	82.5	6.95	4	4.969	NSF
High	IsMasterProtein	O60271	C-Jun-amino-terminal kinase-interacting protein 4 OS=Homo sapiens OX=9606 GN=SPAG9 PE=1 SV=4	0	13.805	3	2	4	2	146.1	5.15	13.55	4.967	SPAG9
High	IsMasterProtein	Q15165	Serum paraoxonase/arylesterase 2 OS=Homo sapiens OX=9606 GN=PON2 PE=1 SV=4	0	12.547	7	2	4	2	39.4	5.6	9.5	4.963
High	IsMasterProtein	P00492	Hypoxanthine-guanine phosphoribosyltransferase OS=Homo sapiens OX=9606 GN=HPRT1 PE=1 SV=2	0	78.872	63	10	55	10	24.6	6.68	135.99	4.96	HPRT1
High	IsMasterProtein	Q13573	SNW domain-containing protein 1 OS=Homo sapiens OX=9606 GN=SNW1 PE=1 SV=1	0	55.928	24	9	22	9	61.5	9.52	47.98	4.96	SNW1
High	IsMasterProtein	Q9NZB2	Constitutive coactivator of PPAR-gamma-like protein 1 OS=Homo sapiens OX=9606 GN=FAM120A PE=1 SV=2	0	55.006	11	8	13	8	121.8	8.88	41.24	4.953	FAM120A
High	IsMasterProtein	Q9Y3C4	EKC/KEOPS complex subunit TPRKB OS=Homo sapiens OX=9606 GN=TPRKB PE=1 SV=1	0	6.522	14	2	7	2	19.6	6.79	8.49	4.951	TPRKB
High	IsMasterProtein	P36507	Dual specificity mitogen-activated protein kinase kinase 2 OS=Homo sapiens OX=9606 GN=MAP2K2 PE=1 SV=1	0	50.532	23	5	15	3	44.4	6.55	58.57	4.939	MAP2K2
High	IsMasterProtein	P50454	Serpin H1 OS=Homo sapiens OX=9606 GN=SERPINH1 PE=1 SV=2	0	122.927	42	12	50	12	46.4	8.69	162.72	4.936	SERPINH1
High	IsMasterProtein	Q52LJ0	Protein FAM98B OS=Homo sapiens OX=9606 GN=FAM98B PE=1 SV=2	0	79.021	29	9	35	9	45.5	8.69	95.61	4.92
High	IsMasterProtein	Q9UBT2	SUMO-activating enzyme subunit 2 OS=Homo sapiens OX=9606 GN=UBA2 PE=1 SV=2	0	58.223	20	8	26	8	71.2	5.29	66.74	4.919	UBA2
High	IsMasterProtein	O95747	Serine/threonine-protein kinase OSR1 OS=Homo sapiens OX=9606 GN=OXSR1 PE=1 SV=1	0	38.375	19	5	14	5	58	6.43	22.18	4.912	OXSR1
High	IsMasterProtein	P30085	UMP-CMP kinase OS=Homo sapiens OX=9606 GN=CMPK1 PE=1 SV=3	0	43.167	26	5	39	5	22.2	5.57	44.08	4.905	CMPK1
High	IsMasterProtein	O43681	ATPase ASNA1 OS=Homo sapiens OX=9606 GN=ASNA1 PE=1 SV=2	0	25.808	17	5	19	5	38.8	4.91	50.02	4.904	ASNA1
High	IsMasterProtein	P22033	Methylmalonyl-CoA mutase, mitochondrial OS=Homo sapiens OX=9606 GN=MMUT PE=1 SV=4	0	6.383	3	2	2	2	83.1	6.93	4.48	4.896	MUT
High	IsMasterProtein	P19525	Interferon-induced, double-stranded RNA-activated protein kinase OS=Homo sapiens OX=9606 GN=EIF2AK2 PE=1 SV=2	0	37.791	15	8	26	8	62.1	8.4	58.07	4.895	EIF2AK2
High	IsMasterProtein	Q9NZT2	Opioid growth factor receptor OS=Homo sapiens OX=9606 GN=OGFR PE=1 SV=3	0	34.997	9	4	7	4	73.3	4.84	23.97	4.891	OGFR
High	IsMasterProtein	O75874	Isocitrate dehydrogenase [NADP] cytoplasmic OS=Homo sapiens OX=9606 GN=IDH1 PE=1 SV=2	0	53.917	26	9	31	9	46.6	7.01	62.06	4.884	IDH1
High	IsMasterProtein	P47712	Cytosolic phospholipase A2 OS=Homo sapiens OX=9606 GN=PLA2G4A PE=1 SV=2	0	49.399	21	12	22	12	85.2	5.38	41.01	4.873	PLA2G4A
High	IsMasterProtein	P30084	Enoyl-CoA hydratase, mitochondrial OS=Homo sapiens OX=9606 GN=ECHS1 PE=1 SV=4	0	82.268	49	10	40	10	31.4	8.07	108.41	4.868	ECHS1
High	IsMasterProtein	P57721	Poly(rC)-binding protein 3 OS=Homo sapiens OX=9606 GN=PCBP3 PE=2 SV=2	0	42.542	15	4	39	1	39.4	8.07	122.28	4.868	PCBP3
High	IsMasterProtein	Q96AC1	Fermitin family homolog 2 OS=Homo sapiens OX=9606 GN=FERMT2 PE=1 SV=1	0	52.693	19	7	22	6	77.8	6.7	53.96	4.865	FERMT2
High	IsMasterProtein	P56182	Ribosomal RNA processing protein 1 homolog A OS=Homo sapiens OX=9606 GN=RRP1 PE=1 SV=1	0	46.624	19	8	22	8	52.8	9.33	59.16	4.865	RRP1
High	IsMasterProtein	Q13616	Cullin-1 OS=Homo sapiens OX=9606 GN=CUL1 PE=1 SV=2	0	23.618	5	3	9	3	89.6	8	21.8	4.865	CUL1
High	IsMasterProtein	P62847	40S ribosomal protein S24 OS=Homo sapiens OX=9606 GN=RPS24 PE=1 SV=1	0	83.118	36	6	112	6	15.4	10.78	297.28	4.857	RPS24
High	IsMasterProtein	Q9BYD6	39S ribosomal protein L1, mitochondrial OS=Homo sapiens OX=9606 GN=MRPL1 PE=1 SV=2	0	22.241	18	4	13	4	36.9	8.78	19.25	4.857	MRPL1
High	IsMasterProtein	O75083	WD repeat-containing protein 1 OS=Homo sapiens OX=9606 GN=WDR1 PE=1 SV=4	0	124.506	39	12	41	12	66.2	6.65	164.04	4.852	WDR1
High	IsMasterProtein	Q13148	TAR DNA-binding protein 43 OS=Homo sapiens OX=9606 GN=TARDBP PE=1 SV=1	0	66.493	35	7	36	7	44.7	6.19	111.72	4.842	TARDBP
High	IsMasterProtein	P63000	Ras-related C3 botulinum toxin substrate 1 OS=Homo sapiens OX=9606 GN=RAC1 PE=1 SV=1	0	22.336	24	5	16	5	21.4	8.5	39.81	4.835	RAC1
High	IsMasterProtein	P55884	Eukaryotic translation initiation factor 3 subunit B OS=Homo sapiens OX=9606 GN=EIF3B PE=1 SV=3	0	209.366	39	28	116	28	92.4	5	316.53	4.829	EIF3B
High	IsMasterProtein	O60884	DnaJ homolog subfamily A member 2 OS=Homo sapiens OX=9606 GN=DNAJA2 PE=1 SV=1	0	18.75	14	4	9	4	45.7	6.48	15.6	4.819	DNAJA2
High	IsMasterProtein	P21980	Protein-glutamine gamma-glutamyltransferase 2 OS=Homo sapiens OX=9606 GN=TGM2 PE=1 SV=2	0	92.983	25	12	33	12	77.3	5.22	92.95	4.803	TGM2
High	IsMasterProtein	O00154	Cytosolic acyl coenzyme A thioester hydrolase OS=Homo sapiens OX=9606 GN=ACOT7 PE=1 SV=3	0	16.975	10	3	10	3	41.8	8.54	17.72	4.798	ACOT7
High	IsMasterProtein	Q9P2I0	Cleavage and polyadenylation specificity factor subunit 2 OS=Homo sapiens OX=9606 GN=CPSF2 PE=1 SV=2	0	10.982	3	2	5	2	88.4	5.11	4.63	4.792	CPSF2
High	IsMasterProtein	Q9Y490	Talin-1 OS=Homo sapiens OX=9606 GN=TLN1 PE=1 SV=3	0	215.49	20	27	72	27	269.6	6.07	163.28	4.788	TLN1
High	IsMasterProtein	Q9BXS5	AP-1 complex subunit mu-1 OS=Homo sapiens OX=9606 GN=AP1M1 PE=1 SV=3	0	47.373	25	8	18	8	48.6	7.3	51.73	4.783	AP1M1
High	IsMasterProtein	Q92900	Regulator of nonsense transcripts 1 OS=Homo sapiens OX=9606 GN=UPF1 PE=1 SV=2	0	62.251	13	12	28	12	124.3	6.61	70.48	4.775	UPF1
High	IsMasterProtein	Q8IWS0	PHD finger protein 6 OS=Homo sapiens OX=9606 GN=PHF6 PE=1 SV=1	0	38.427	30	8	17	8	41.3	8.68	39.72	4.77	PHF6
High	IsMasterProtein	Q10471	Polypeptide N-acetylgalactosaminyltransferase 2 OS=Homo sapiens OX=9606 GN=GALNT2 PE=1 SV=1	0	8.945	5	2	3	2	64.7	8.35	7.07	4.744	GALNT2
High	IsMasterProtein	O00231	26S proteasome non-ATPase regulatory subunit 11 OS=Homo sapiens OX=9606 GN=PSMD11 PE=1 SV=3	0	83.578	42	14	44	14	47.4	6.48	100.07	4.731	PSMD11
High	IsMasterProtein	O15372	Eukaryotic translation initiation factor 3 subunit H OS=Homo sapiens OX=9606 GN=EIF3H PE=1 SV=1	0	23.389	17	5	11	5	39.9	6.54	34.98	4.716	EIF3H
High	IsMasterProtein	O00170	AH receptor-interacting protein OS=Homo sapiens OX=9606 GN=AIP PE=1 SV=2	0	30.74	24	6	17	6	37.6	6.29	48.99	4.7	AIP
High	IsMasterProtein	O00410	Importin-5 OS=Homo sapiens OX=9606 GN=IPO5 PE=1 SV=4	0	249.07	41	31	126	27	123.6	4.94	344.22	4.689	IPO5
High	IsMasterProtein	P61086	Ubiquitin-conjugating enzyme E2 K OS=Homo sapiens OX=9606 GN=UBE2K PE=1 SV=3	0	12.897	19	3	8	3	22.4	5.44	28.28	4.675	UBE2K
High	IsMasterProtein	P49458	Signal recognition particle 9 kDa protein OS=Homo sapiens OX=9606 GN=SRP9 PE=1 SV=2	0	30.912	50	5	29	5	10.1	7.97	84.84	4.673	SRP9; SRP9P1
High	IsMasterProtein	P09972	Fructose-bisphosphate aldolase C OS=Homo sapiens OX=9606 GN=ALDOC PE=1 SV=2	0	37.971	9	3	16	2	39.4	6.87	47.93	4.647	ALDOC
High	IsMasterProtein	P38117	Electron transfer flavoprotein subunit beta OS=Homo sapiens OX=9606 GN=ETFB PE=1 SV=3	0	92.46	53	13	57	13	27.8	8.1	160.23	4.639	ETFB
High	IsMasterProtein	P22626	Heterogeneous nuclear ribonucleoproteins A2/B1 OS=Homo sapiens OX=9606 GN=HNRNPA2B1 PE=1 SV=2	0	248.088	65	24	159	19	37.4	8.95	482.73	4.636	HNRNPA2B1
High	IsMasterProtein	Q8TDN6	Ribosome biogenesis protein BRX1 homolog OS=Homo sapiens OX=9606 GN=BRIX1 PE=1 SV=2	0	181.5	59	18	110	18	41.4	9.92	295.97	4.631	BRIX1
High	IsMasterProtein	P55327	Tumor protein D52 OS=Homo sapiens OX=9606 GN=TPD52 PE=1 SV=2	0	67.447	53	7	22	7	24.3	4.83	73.66	4.627	TPD52
High	IsMasterProtein	P48444	Coatomer subunit delta OS=Homo sapiens OX=9606 GN=ARCN1 PE=1 SV=1	0	40.233	19	8	18	8	57.2	6.21	48.75	4.625	ARCN1
High	IsMasterProtein	P41250	Glycine--tRNA ligase OS=Homo sapiens OX=9606 GN=GARS1 PE=1 SV=3	0	153.837	34	18	80	18	83.1	7.03	188.27	4.619	GARS
High	IsMasterProtein	Q9BYC8	39S ribosomal protein L32, mitochondrial OS=Homo sapiens OX=9606 GN=MRPL32 PE=1 SV=1	0	11.965	12	2	3	2	21.4	9.73	8.82	4.613	MRPL32
High	IsMasterProtein	Q9UHY1	Nuclear receptor-binding protein OS=Homo sapiens OX=9606 GN=NRBP1 PE=1 SV=1	0	12.191	7	2	5	2	59.8	5.08	10.13	4.597	NRBP1
High	IsMasterProtein	P43243	Matrin-3 OS=Homo sapiens OX=9606 GN=MATR3 PE=1 SV=2	0	346.016	49	34	204	34	94.6	6.25	564.52	4.592	MATR3
High	IsMasterProtein	P62906	60S ribosomal protein L10a OS=Homo sapiens OX=9606 GN=RPL10A PE=1 SV=2	0	192.06	44	12	259	12	24.8	9.94	687.03	4.587	RPL10A
High	IsMasterProtein	Q8IUF8	Ribosomal oxygenase 2 OS=Homo sapiens OX=9606 GN=RIOX2 PE=1 SV=1	0	7.003	8	2	3	2	52.8	6.7	2.33	4.587	MINA; RIOX2
High	IsMasterProtein	P61081	NEDD8-conjugating enzyme Ubc12 OS=Homo sapiens OX=9606 GN=UBE2M PE=1 SV=1	0	20.012	25	4	20	4	20.9	7.69	42.82	4.579	UBE2M
High	IsMasterProtein	P42166	Lamina-associated polypeptide 2, isoform alpha OS=Homo sapiens OX=9606 GN=TMPO PE=1 SV=2	0	63.254	20	8	27	5	75.4	7.66	75.48	4.574	TMPO
High	IsMasterProtein	Q99848	Probable rRNA-processing protein EBP2 OS=Homo sapiens OX=9606 GN=EBNA1BP2 PE=1 SV=2	0	123.005	44	15	104	15	34.8	10.1	283.4	4.573	EBNA1BP2
High	IsMasterProtein	Q9NSE4	Isoleucine--tRNA ligase, mitochondrial OS=Homo sapiens OX=9606 GN=IARS2 PE=1 SV=2	0	7.984	4	3	4	3	113.7	7.2	6.64	4.569	IARS2
High	IsMasterProtein	Q12797	Aspartyl/asparaginyl beta-hydroxylase OS=Homo sapiens OX=9606 GN=ASPH PE=1 SV=3	0	56.164	18	7	21	7	85.8	5.01	58.5	4.568	ASPH
High	IsMasterProtein	O14929	Histone acetyltransferase type B catalytic subunit OS=Homo sapiens OX=9606 GN=HAT1 PE=1 SV=1	0	43.925	24	6	21	6	49.5	5.69	53.05	4.566	HAT1
High	IsMasterProtein	P45974	Ubiquitin carboxyl-terminal hydrolase 5 OS=Homo sapiens OX=9606 GN=USP5 PE=1 SV=2	0	139.499	38	19	65	17	95.7	5.03	158.65	4.533	USP5
High	IsMasterProtein	P40763	Signal transducer and activator of transcription 3 OS=Homo sapiens OX=9606 GN=STAT3 PE=1 SV=2	0	51.625	13	5	11	5	88	6.3	36.83	4.52	STAT3
High	IsMasterProtein	Q15149	Plectin OS=Homo sapiens OX=9606 GN=PLEC PE=1 SV=3	0	593.063	25	87	261	83	531.5	5.96	714.58	4.509	PLEC
High	IsMasterProtein	P61586	Transforming protein RhoA OS=Homo sapiens OX=9606 GN=RHOA PE=1 SV=1	0	74.374	47	8	45	8	21.8	6.1	116.16	4.508	RHOA
High	IsMasterProtein	O00488	Zinc finger protein 593 OS=Homo sapiens OX=9606 GN=ZNF593 PE=1 SV=2	0	9.713	18	2	4	2	15.2	9.82	1.96	4.499	ZNF593
High	IsMasterProtein	Q13526	Peptidyl-prolyl cis-trans isomerase NIMA-interacting 1 OS=Homo sapiens OX=9606 GN=PIN1 PE=1 SV=1	0	11.519	18	2	4	2	18.2	8.82	13.07	4.49	PIN1
High	IsMasterProtein	Q15642	Cdc42-interacting protein 4 OS=Homo sapiens OX=9606 GN=TRIP10 PE=1 SV=3	0	7.771	5	2	2	2	68.3	5.73	4.72	4.478	TRIP10
High	IsMasterProtein	P42771	Cyclin-dependent kinase inhibitor 2A OS=Homo sapiens OX=9606 GN=CDKN2A PE=1 SV=2	0	21.886	26	3	10	3	16.5	5.81	29.57	4.475	CDKN2A
High	IsMasterProtein	P61019	Ras-related protein Rab-2A OS=Homo sapiens OX=9606 GN=RAB2A PE=1 SV=1	0	9.94	12	2	3	2	23.5	6.54	9.23	4.449	RAB2A
High	IsMasterProtein	Q14683	Structural maintenance of chromosomes protein 1A OS=Homo sapiens OX=9606 GN=SMC1A PE=1 SV=2	0	194.504	33	30	86	30	143.1	7.64	231.76	4.443	SMC1A
High	IsMasterProtein	Q96IU4	Protein ABHD14B OS=Homo sapiens OX=9606 GN=ABHD14B PE=1 SV=1	0	41.965	45	6	24	6	22.3	6.4	57.48	4.432	ABHD14B
High	IsMasterProtein	P11387	DNA topoisomerase 1 OS=Homo sapiens OX=9606 GN=TOP1 PE=1 SV=2	0	7.848	3	2	4	2	90.7	9.31	10.52	4.427	TOP1
High	IsMasterProtein	P05161	Ubiquitin-like protein ISG15 OS=Homo sapiens OX=9606 GN=ISG15 PE=1 SV=5	0	11.801	24	2	4	2	17.9	7.44	9.67	4.426	ISG15
High	IsMasterProtein	Q02878	60S ribosomal protein L6 OS=Homo sapiens OX=9606 GN=RPL6 PE=1 SV=3	0	237.452	53	20	267	20	32.7	10.58	663.91	4.414	RPL6
High	IsMasterProtein	O43143	Pre-mRNA-splicing factor ATP-dependent RNA helicase DHX15 OS=Homo sapiens OX=9606 GN=DHX15 PE=1 SV=2	0	143.845	35	23	75	22	90.9	7.46	186.88	4.403	DHX15
High	IsMasterProtein	Q96SI9	Spermatid perinuclear RNA-binding protein OS=Homo sapiens OX=9606 GN=STRBP PE=1 SV=1	0	82.387	14	10	64	2	73.6	8.72	159.08	4.396	STRBP
High	IsMasterProtein	P60660	Myosin light polypeptide 6 OS=Homo sapiens OX=9606 GN=MYL6 PE=1 SV=2	0	33.934	40	5	28	5	16.9	4.65	74.38	4.386	MYL6
High	IsMasterProtein	O00567	Nucleolar protein 56 OS=Homo sapiens OX=9606 GN=NOP56 PE=1 SV=4	0	39.395	10	4	13	4	66	9.19	39.91	4.386	NOP56
High	IsMasterProtein	P49588	Alanine--tRNA ligase, cytoplasmic OS=Homo sapiens OX=9606 GN=AARS PE=1 SV=2	0	297.849	42	30	152	30	106.7	5.53	424.04	4.374	AARS
High	IsMasterProtein	Q9BZZ5	Apoptosis inhibitor 5 OS=Homo sapiens OX=9606 GN=API5 PE=1 SV=3	0	44.51	11	4	16	4	59	7.34	44.4	4.362	API5
High	IsMasterProtein	O43242	26S proteasome non-ATPase regulatory subunit 3 OS=Homo sapiens OX=9606 GN=PSMD3 PE=1 SV=2	0	104.191	36	14	50	14	60.9	8.44	136.1	4.36	PSMD3
High	IsMasterProtein	Q13435	Splicing factor 3B subunit 2 OS=Homo sapiens OX=9606 GN=SF3B2 PE=1 SV=2	0	313.398	47	37	175	37	100.2	5.67	510.85	4.343	SF3B2
High	IsMasterProtein	Q14C86	GTPase-activating protein and VPS9 domain-containing protein 1 OS=Homo sapiens OX=9606 GN=GAPVD1 PE=1 SV=2	0	34.934	6	6	9	6	164.9	5.22	26.61	4.328	GAPVD1
High	IsMasterProtein	P08754	Guanine nucleotide-binding protein G(i) subunit alpha OS=Homo sapiens OX=9606 GN=GNAI3 PE=1 SV=3	0	24.271	12	3	8	2	40.5	5.69	22.07	4.31	GNAI3
High	IsMasterProtein	Q9HAB8	Phosphopantothenate--cysteine ligase OS=Homo sapiens OX=9606 GN=PPCS PE=1 SV=2	0	5.684	6	2	2	2	34	6.71	3.66	4.303	PPCS
High	IsMasterProtein	Q9UHD8	Septin-9 OS=Homo sapiens OX=9606 GN=SEPTIN9 PE=1 SV=2	0	93.082	28	13	36	13	65.4	8.97	118.42	4.286	2020-09-09
High	IsMasterProtein	Q96PK6	RNA-binding protein 14 OS=Homo sapiens OX=9606 GN=RBM14 PE=1 SV=2	0	47.936	14	9	25	9	69.4	9.67	70.27	4.262	RBM14; RBM14-RBM4
High	IsMasterProtein	Q16401	26S proteasome non-ATPase regulatory subunit 5 OS=Homo sapiens OX=9606 GN=PSMD5 PE=1 SV=3	0	37.213	23	8	18	8	56.2	5.48	46.53	4.258	PSMD5
High	IsMasterProtein	Q12996	Cleavage stimulation factor subunit 3 OS=Homo sapiens OX=9606 GN=CSTF3 PE=1 SV=1	0	18.464	7	3	5	3	82.9	8.12	15.83	4.226	CSTF3
High	IsMasterProtein	P33316	Deoxyuridine 5'-triphosphate nucleotidohydrolase, mitochondrial OS=Homo sapiens OX=9606 GN=DUT PE=1 SV=4	0	40.952	38	7	24	7	26.5	9.36	61.22	4.22	DUT
High	IsMasterProtein	Q9HC35	Echinoderm microtubule-associated protein-like 4 OS=Homo sapiens OX=9606 GN=EML4 PE=1 SV=3	0	23.3	8	5	9	5	108.8	6.4	26.38	4.215	EML4
High	IsMasterProtein	P00338	L-lactate dehydrogenase A chain OS=Homo sapiens OX=9606 GN=LDHA PE=1 SV=2	0	365.848	80	28	346	27	36.7	8.27	918.91	4.206	LDHA
High	IsMasterProtein	P09622	Dihydrolipoyl dehydrogenase, mitochondrial OS=Homo sapiens OX=9606 GN=DLD PE=1 SV=2	0	55.2	27	8	24	8	54.1	7.85	64.38	4.203	DLD
High	IsMasterProtein	P49915	GMP synthase [glutamine-hydrolyzing] OS=Homo sapiens OX=9606 GN=GMPS PE=1 SV=1	0	271.869	60	29	143	29	76.7	6.87	399.98	4.197	GMPS
High	IsMasterProtein	P13861	cAMP-dependent protein kinase type II-alpha regulatory subunit OS=Homo sapiens OX=9606 GN=PRKAR2A PE=1 SV=2	0	58.518	23	6	16	6	45.5	5.07	51.63	4.188	PRKAR2A
High	IsMasterProtein	Q9UMS4	Pre-mRNA-processing factor 19 OS=Homo sapiens OX=9606 GN=PRPF19 PE=1 SV=1	0	183.335	60	16	99	16	55.1	6.61	327.3	4.176	PRPF19
High	IsMasterProtein	Q01082	Spectrin beta chain, non-erythrocytic 1 OS=Homo sapiens OX=9606 GN=SPTBN1 PE=1 SV=2	0	261.419	23	38	90	38	274.4	5.57	261.31	4.173	SPTBN1
High	IsMasterProtein	Q9BSJ8	Extended synaptotagmin-1 OS=Homo sapiens OX=9606 GN=ESYT1 PE=1 SV=1	0	82.51	13	9	19	9	122.8	5.83	61.61	4.169	ESYT1
High	IsMasterProtein	P68104	Elongation factor 1-alpha 1 OS=Homo sapiens OX=9606 GN=EEF1A1 PE=1 SV=1	0	502.146	71	26	761	14	50.1	9.01	1754.54	4.165	EEF1A1
High	IsMasterProtein	Q15459	Splicing factor 3A subunit 1 OS=Homo sapiens OX=9606 GN=SF3A1 PE=1 SV=1	0	98.09	24	14	64	14	88.8	5.22	176.05	4.152	SF3A1
High	IsMasterProtein	P54577	Tyrosine--tRNA ligase, cytoplasmic OS=Homo sapiens OX=9606 GN=YARS PE=1 SV=4	0	80.521	37	15	41	15	59.1	7.05	111.64	4.148	YARS
High	IsMasterProtein	P21281	V-type proton ATPase subunit B, brain isoform OS=Homo sapiens OX=9606 GN=ATP6V1B2 PE=1 SV=3	0	42.004	23	7	17	7	56.5	5.81	39.09	4.148	ATP6V1B2
High	IsMasterProtein	Q9UI30	Multifunctional methyltransferase subunit TRM112-like protein OS=Homo sapiens OX=9606 GN=TRMT112 PE=1 SV=1	0	22.752	27	3	10	3	14.2	5.26	21.98	4.14	TRMT112
High	IsMasterProtein	O75947	ATP synthase subunit d, mitochondrial OS=Homo sapiens OX=9606 GN=ATP5PD PE=1 SV=3	0	21.714	30	4	11	4	18.5	5.3	22.21	4.135	ATP5H
High	IsMasterProtein	P50990	T-complex protein 1 subunit theta OS=Homo sapiens OX=9606 GN=CCT8 PE=1 SV=4	0	149.307	47	24	108	24	59.6	5.6	275.3	4.131	CCT8
High	IsMasterProtein	Q7L2H7	Eukaryotic translation initiation factor 3 subunit M OS=Homo sapiens OX=9606 GN=EIF3M PE=1 SV=1	0	41.698	22	5	12	5	42.5	5.63	39.64	4.12	EIF3M
High	IsMasterProtein	P22314	Ubiquitin-like modifier-activating enzyme 1 OS=Homo sapiens OX=9606 GN=UBA1 PE=1 SV=3	0	526.752	57	40	423	40	117.8	5.76	1238.36	4.119	UBA1
High	IsMasterProtein	P49903	Selenide, water dikinase 1 OS=Homo sapiens OX=9606 GN=SEPHS1 PE=1 SV=2	0	16.362	11	3	8	3	42.9	5.97	22.72	4.118	SEPHS1
High	IsMasterProtein	Q02790	Peptidyl-prolyl cis-trans isomerase FKBP4 OS=Homo sapiens OX=9606 GN=FKBP4 PE=1 SV=3	0	99.821	35	11	47	11	51.8	5.43	147.24	4.112	FKBP4
High	IsMasterProtein	P51610	Host cell factor 1 OS=Homo sapiens OX=9606 GN=HCFC1 PE=1 SV=2	0	21.584	3	4	11	4	208.6	7.46	21.69	4.097	HCFC1
High	IsMasterProtein	P48735	Isocitrate dehydrogenase [NADP], mitochondrial OS=Homo sapiens OX=9606 GN=IDH2 PE=1 SV=2	0	35.372	17	6	14	6	50.9	8.69	33.63	4.094	IDH2
High	IsMasterProtein	Q6WKZ4	Rab11 family-interacting protein 1 OS=Homo sapiens OX=9606 GN=RAB11FIP1 PE=1 SV=3	0	10.47	2	2	3	2	137.1	5.43	7.96	4.076	RAB11FIP1
High	IsMasterProtein	P63173	60S ribosomal protein L38 OS=Homo sapiens OX=9606 GN=RPL38 PE=1 SV=2	0	68.881	53	7	94	7	8.2	10.1	251.29	4.064	RPL38
High	IsMasterProtein	O75131	Copine-3 OS=Homo sapiens OX=9606 GN=CPNE3 PE=1 SV=1	0	12.955	6	2	5	2	60.1	5.85	10.24	4.064	CPNE3
High	IsMasterProtein	Q13813	Spectrin alpha chain, non-erythrocytic 1 OS=Homo sapiens OX=9606 GN=SPTAN1 PE=1 SV=3	0	181.305	18	29	63	29	284.4	5.35	177.5	4.063	SPTAN1
High	IsMasterProtein	Q7Z6E9	E3 ubiquitin-protein ligase RBBP6 OS=Homo sapiens OX=9606 GN=RBBP6 PE=1 SV=1	0	18.527	2	3	14	3	201.4	9.64	38.64	4.061	RBBP6
High	IsMasterProtein	P22392	Nucleoside diphosphate kinase B OS=Homo sapiens OX=9606 GN=NME2 PE=1 SV=1	0	134.669	74	11	131	6	17.3	8.41	315.82	4.033	NME2; NME1-NME2
High	IsMasterProtein	P62277	40S ribosomal protein S13 OS=Homo sapiens OX=9606 GN=RPS13 PE=1 SV=2	0	129.864	52	13	163	13	17.2	10.54	432.39	3.995	RPS13
High	IsMasterProtein	Q96GA3	Protein LTV1 homolog OS=Homo sapiens OX=9606 GN=LTV1 PE=1 SV=1	0	27.588	11	4	12	4	54.8	4.91	26.73	3.994	LTV1
High	IsMasterProtein	Q96P16	Regulation of nuclear pre-mRNA domain-containing protein 1A OS=Homo sapiens OX=9606 GN=RPRD1A PE=1 SV=1	0	12.499	9	2	6	2	35.7	7.55	12.34	3.992	RPRD1A
High	IsMasterProtein	Q00169	Phosphatidylinositol transfer protein alpha isoform OS=Homo sapiens OX=9606 GN=PITPNA PE=1 SV=2	0	6.745	8	2	4	1	31.8	6.55	10.92	3.983	PITPNA
High	IsMasterProtein	P15170	Eukaryotic peptide chain release factor GTP-binding subunit ERF3A OS=Homo sapiens OX=9606 GN=GSPT1 PE=1 SV=1	0	65.701	24	11	39	3	55.7	5.62	99.18	3.977	GSPT1
High	IsMasterProtein	P08243	Asparagine synthetase [glutamine-hydrolyzing] OS=Homo sapiens OX=9606 GN=ASNS PE=1 SV=4	0	40.235	20	9	28	9	64.3	6.86	53.87	3.97	ASNS
High	IsMasterProtein	Q9BZK7	F-box-like/WD repeat-containing protein TBL1XR1 OS=Homo sapiens OX=9606 GN=TBL1XR1 PE=1 SV=1	0	66.791	19	7	20	7	55.6	5.55	66.78	3.954	TBL1XR1
High	IsMasterProtein	P61201	COP9 signalosome complex subunit 2 OS=Homo sapiens OX=9606 GN=COPS2 PE=1 SV=1	0	25.901	17	4	15	4	51.6	5.53	34.08	3.95	COPS2
High	IsMasterProtein	Q9P015	39S ribosomal protein L15, mitochondrial OS=Homo sapiens OX=9606 GN=MRPL15 PE=1 SV=1	0	9.135	10	2	4	2	33.4	10.01	3	3.95	MRPL15
High	IsMasterProtein	Q562R1	Beta-actin-like protein 2 OS=Homo sapiens OX=9606 GN=ACTBL2 PE=1 SV=2	0	93.441	20	10	378	1	42	5.59	518.67	3.939	ACTBL2
High	IsMasterProtein	Q13242	Serine/arginine-rich splicing factor 9 OS=Homo sapiens OX=9606 GN=SRSF9 PE=1 SV=1	0	19.708	31	6	11	6	25.5	8.65	27.49	3.919	SRSF9
High	IsMasterProtein	P52788	Spermine synthase OS=Homo sapiens OX=9606 GN=SMS PE=1 SV=2	0	182.931	67	19	74	19	41.2	5.02	234.12	3.917	SMS
High	IsMasterProtein	P06737	Glycogen phosphorylase, liver form OS=Homo sapiens OX=9606 GN=PYGL PE=1 SV=4	0	137.279	30	19	72	15	97.1	7.17	196.04	3.911	PYGL
High	IsMasterProtein	Q96FW1	Ubiquitin thioesterase OTUB1 OS=Homo sapiens OX=9606 GN=OTUB1 PE=1 SV=2	0	49.283	30	7	25	7	31.3	4.94	65.47	3.909	OTUB1
High	IsMasterProtein	Q8TAQ2	SWI/SNF complex subunit SMARCC2 OS=Homo sapiens OX=9606 GN=SMARCC2 PE=1 SV=1	0	23.841	2	2	9	1	132.8	5.69	21.4	3.904	SMARCC2
High	IsMasterProtein	Q15046	Lysine--tRNA ligase OS=Homo sapiens OX=9606 GN=KARS1 PE=1 SV=3	0	147.471	49	23	95	23	68	6.35	227.68	3.897	KARS
High	IsMasterProtein	Q9GZZ1	N-alpha-acetyltransferase 50 OS=Homo sapiens OX=9606 GN=NAA50 PE=1 SV=1	0	29.575	28	6	12	6	19.4	8.81	31.01	3.879	NAA50
High	IsMasterProtein	Q15008	26S proteasome non-ATPase regulatory subunit 6 OS=Homo sapiens OX=9606 GN=PSMD6 PE=1 SV=1	0	34.409	14	5	17	5	45.5	5.62	41.69	3.877	PSMD6
High	IsMasterProtein	P18615	Negative elongation factor E OS=Homo sapiens OX=9606 GN=NELFE PE=1 SV=3	0	37.453	20	6	23	6	43.2	9.33	44.74	3.872	NELFE; RDBP
High	IsMasterProtein	O00487	26S proteasome non-ATPase regulatory subunit 14 OS=Homo sapiens OX=9606 GN=PSMD14 PE=1 SV=1	0	56.903	38	7	32	7	34.6	6.52	53.38	3.866	PSMD14
High	IsMasterProtein	Q16666	Gamma-interferon-inducible protein 16 OS=Homo sapiens OX=9606 GN=IFI16 PE=1 SV=3	0	57.375	15	10	34	10	88.2	9.28	73.37	3.86	IFI16
High	IsMasterProtein	Q9NR50	Translation initiation factor eIF-2B subunit gamma OS=Homo sapiens OX=9606 GN=EIF2B3 PE=1 SV=1	0	15.955	13	3	5	3	50.2	6.47	9.88	3.86	EIF2B3
High	IsMasterProtein	P40121	Macrophage-capping protein OS=Homo sapiens OX=9606 GN=CAPG PE=1 SV=2	0	104.582	55	12	61	12	38.5	6.19	201.82	3.857	CAPG
High	IsMasterProtein	Q9GZS3	WD repeat-containing protein 61 OS=Homo sapiens OX=9606 GN=WDR61 PE=1 SV=1	0	18.143	26	4	13	4	33.6	5.47	21.01	3.855	WDR61
High	IsMasterProtein	Q8TBB5	Kelch domain-containing protein 4 OS=Homo sapiens OX=9606 GN=KLHDC4 PE=1 SV=1	0	14.581	8	3	7	3	57.9	5.72	13.01	3.852	KLHDC4
High	IsMasterProtein	Q3LXA3	Triokinase/FMN cyclase OS=Homo sapiens OX=9606 GN=TKFC PE=1 SV=2	0	64.378	21	7	21	7	58.9	7.49	47.7	3.849	DAK; TKFC
High	IsMasterProtein	Q9BRA2	Thioredoxin domain-containing protein 17 OS=Homo sapiens OX=9606 GN=TXNDC17 PE=1 SV=1	0	30.187	60	5	41	5	13.9	5.52	59.77	3.848	TXNDC17
High	IsMasterProtein	P40261	Nicotinamide N-methyltransferase OS=Homo sapiens OX=9606 GN=NNMT PE=1 SV=1	0	55.199	30	7	46	7	29.6	5.74	107.43	3.846	NNMT
High	IsMasterProtein	P82930	28S ribosomal protein S34, mitochondrial OS=Homo sapiens OX=9606 GN=MRPS34 PE=1 SV=2	0	6.329	11	3	5	3	25.6	9.98	7.06	3.845	MRPS34
High	IsMasterProtein	Q5BKZ1	DBIRD complex subunit ZNF326 OS=Homo sapiens OX=9606 GN=ZNF326 PE=1 SV=2	0	27.048	10	5	12	5	65.6	5.15	24.91	3.834	ZNF326
High	IsMasterProtein	P12268	Inosine-5'-monophosphate dehydrogenase 2 OS=Homo sapiens OX=9606 GN=IMPDH2 PE=1 SV=2	0	140.848	37	14	64	14	55.8	6.9	218.84	3.832	IMPDH2
High	IsMasterProtein	Q9Y3A5	Ribosome maturation protein SBDS OS=Homo sapiens OX=9606 GN=SBDS PE=1 SV=4	0	79.236	62	14	49	14	28.7	8.75	126.05	3.832	SBDS
High	IsMasterProtein	Q00839	Heterogeneous nuclear ribonucleoprotein U OS=Homo sapiens OX=9606 GN=HNRNPU PE=1 SV=6	0	529.155	54	42	444	42	90.5	6	1352.3	3.818	HNRNPU
High	IsMasterProtein	P33176	Kinesin-1 heavy chain OS=Homo sapiens OX=9606 GN=KIF5B PE=1 SV=1	0	120.285	26	16	47	16	109.6	6.51	137.76	3.784	KIF5B
High	IsMasterProtein	P26639	Threonine--tRNA ligase 1, cytoplasmic OS=Homo sapiens OX=9606 GN=TARS1 PE=1 SV=3	0	262.872	54	36	182	36	83.4	6.67	436.54	3.783	TARS
High	IsMasterProtein	P38919	Eukaryotic initiation factor 4A-III OS=Homo sapiens OX=9606 GN=EIF4A3 PE=1 SV=4	0	105.584	30	12	76	9	46.8	6.73	215.94	3.783	EIF4A3
High	IsMasterProtein	P46013	Proliferation marker protein Ki-67 OS=Homo sapiens OX=9606 GN=MKI67 PE=1 SV=2	0	68.371	7	12	29	12	358.5	9.45	79.79	3.774	MKI67
High	IsMasterProtein	P04083	Annexin A1 OS=Homo sapiens OX=9606 GN=ANXA1 PE=1 SV=2	0	169.981	54	17	91	17	38.7	7.02	278.71	3.769	ANXA1
High	IsMasterProtein	Q9NR45	Sialic acid synthase OS=Homo sapiens OX=9606 GN=NANS PE=1 SV=2	0	57.833	35	9	30	9	40.3	6.74	76.02	3.761	NANS
High	IsMasterProtein	Q04637	Eukaryotic translation initiation factor 4 gamma 1 OS=Homo sapiens OX=9606 GN=EIF4G1 PE=1 SV=4	0	249.739	26	35	120	29	175.4	5.33	326.19	3.757	EIF4G1
High	IsMasterProtein	P62861	40S ribosomal protein S30 OS=Homo sapiens OX=9606 GN=FAU PE=1 SV=1	0	22.28	20	3	49	3	6.6	12.15	122.51	3.749	FAU
High	IsMasterProtein	Q13601	KRR1 small subunit processome component homolog OS=Homo sapiens OX=9606 GN=KRR1 PE=1 SV=4	0	22.374	14	4	10	4	43.6	9.77	22.96	3.748	KRR1
High	IsMasterProtein	P49756	RNA-binding protein 25 OS=Homo sapiens OX=9606 GN=RBM25 PE=1 SV=3	0	138.909	27	17	81	17	100.1	6.32	189.95	3.739	RBM25
High	IsMasterProtein	O75494	Serine/arginine-rich splicing factor 10 OS=Homo sapiens OX=9606 GN=SRSF10 PE=1 SV=1	0	63.835	24	8	28	8	31.3	11.27	94.3	3.738	SRSF10; LOC100996657
High	IsMasterProtein	Q8N163	Cell cycle and apoptosis regulator protein 2 OS=Homo sapiens OX=9606 GN=CCAR2 PE=1 SV=2	0	124.303	27	16	75	16	102.8	5.22	169.13	3.736	CCAR2; KIAA1967
High	IsMasterProtein	P23919	Thymidylate kinase OS=Homo sapiens OX=9606 GN=DTYMK PE=1 SV=4	0	14.225	18	4	7	4	23.8	8.27	14.49	3.732	DTYMK
High	IsMasterProtein	P51659	Peroxisomal multifunctional enzyme type 2 OS=Homo sapiens OX=9606 GN=HSD17B4 PE=1 SV=3	0	22.232	9	4	7	4	79.6	8.84	20.92	3.728	HSD17B4
High	IsMasterProtein	Q13595	Transformer-2 protein homolog alpha OS=Homo sapiens OX=9606 GN=TRA2A PE=1 SV=1	0	22.018	16	3	8	3	32.7	11.27	20.08	3.722	TRA2A
High	IsMasterProtein	O94906	Pre-mRNA-processing factor 6 OS=Homo sapiens OX=9606 GN=PRPF6 PE=1 SV=1	0	41.297	11	8	16	8	106.9	8.25	49.74	3.719	PRPF6
High	IsMasterProtein	P06730	Eukaryotic translation initiation factor 4E OS=Homo sapiens OX=9606 GN=EIF4E PE=1 SV=2	0	19.453	12	2	13	2	25.1	6.15	34.99	3.696	EIF4E
High	IsMasterProtein	Q96I99	Succinate--CoA ligase [GDP-forming] subunit beta, mitochondrial OS=Homo sapiens OX=9606 GN=SUCLG2 PE=1 SV=2	0	19.201	13	4	5	4	46.5	6.39	11.88	3.691	SUCLG2
High	IsMasterProtein	P62241	40S ribosomal protein S8 OS=Homo sapiens OX=9606 GN=RPS8 PE=1 SV=2	0	147.441	59	13	187	13	24.2	10.32	545.96	3.682	RPS8
High	IsMasterProtein	O95816	BAG family molecular chaperone regulator 2 OS=Homo sapiens OX=9606 GN=BAG2 PE=1 SV=1	0	20.177	29	4	9	4	23.8	6.7	25.01	3.681	BAG2
High	IsMasterProtein	Q15369	Elongin-C OS=Homo sapiens OX=9606 GN=ELOC PE=1 SV=1	0	20.272	30	2	8	2	12.5	4.78	18.08	3.673	TCEB1; ELOC
High	IsMasterProtein	P67775	Serine/threonine-protein phosphatase 2A catalytic subunit alpha isoform OS=Homo sapiens OX=9606 GN=PPP2CA PE=1 SV=1	0	96.224	44	9	48	9	35.6	5.54	162.96	3.663	PPP2CA
High	IsMasterProtein	P20962	Parathymosin OS=Homo sapiens OX=9606 GN=PTMS PE=1 SV=2	0	13.769	23	2	5	2	11.5	4.16	15.7	3.663	PTMS
High	IsMasterProtein	O60488	Long-chain-fatty-acid--CoA ligase 4 OS=Homo sapiens OX=9606 GN=ACSL4 PE=1 SV=2	0	11.483	4	2	5	1	79.1	8.38	8.96	3.653	ACSL4
High	IsMasterProtein	P53985	Monocarboxylate transporter 1 OS=Homo sapiens OX=9606 GN=SLC16A1 PE=1 SV=3	0	19.75	6	2	7	2	53.9	8.66	24.09	3.65	SLC16A1
High	IsMasterProtein	P54920	Alpha-soluble NSF attachment protein OS=Homo sapiens OX=9606 GN=NAPA PE=1 SV=3	0	16.225	9	2	6	2	33.2	5.36	22.08	3.649	NAPA
High	IsMasterProtein	Q8WWM7	Ataxin-2-like protein OS=Homo sapiens OX=9606 GN=ATXN2L PE=1 SV=2	0	12.76	3	2	4	2	113.3	8.59	14.21	3.64	ATXN2L
High	IsMasterProtein	Q9UN86	Ras GTPase-activating protein-binding protein 2 OS=Homo sapiens OX=9606 GN=G3BP2 PE=1 SV=2	0	20.854	10	4	14	4	54.1	5.55	31.81	3.634	G3BP2
High	IsMasterProtein	Q96ER3	Protein SAAL1 OS=Homo sapiens OX=9606 GN=SAAL1 PE=1 SV=2	0	5.665	4	2	4	2	53.5	4.5	3.37	3.626	SAAL1
High	IsMasterProtein	P49368	T-complex protein 1 subunit gamma OS=Homo sapiens OX=9606 GN=CCT3 PE=1 SV=4	0	244.31	61	30	149	30	60.5	6.49	415.1	3.619	CCT3
High	IsMasterProtein	P78344	Eukaryotic translation initiation factor 4 gamma 2 OS=Homo sapiens OX=9606 GN=EIF4G2 PE=1 SV=1	0	72.072	19	12	28	12	102.3	7.14	58.72	3.617	EIF4G2
High	IsMasterProtein	P05783	Keratin, type I cytoskeletal 18 OS=Homo sapiens OX=9606 GN=KRT18 PE=1 SV=2	0	380.072	79	32	231	21	48	5.45	631.27	3.614	KRT18
High	IsMasterProtein	P32119	Peroxiredoxin-2 OS=Homo sapiens OX=9606 GN=PRDX2 PE=1 SV=5	0	68.781	42	11	115	10	21.9	5.97	267.05	3.61	PRDX2
High	IsMasterProtein	P62995	Transformer-2 protein homolog beta OS=Homo sapiens OX=9606 GN=TRA2B PE=1 SV=1	0	49.013	27	6	46	6	33.6	11.25	103.81	3.593	TRA2B
High	IsMasterProtein	Q9Y6G9	Cytoplasmic dynein 1 light intermediate chain 1 OS=Homo sapiens OX=9606 GN=DYNC1LI1 PE=1 SV=3	0	18.028	6	2	8	2	56.5	6.42	10.98	3.584	DYNC1LI1
High	IsMasterProtein	P35579	Myosin-9 OS=Homo sapiens OX=9606 GN=MYH9 PE=1 SV=4	0	214.35	20	26	79	26	226.4	5.6	210.55	3.579	MYH9
High	IsMasterProtein	Q16222	UDP-N-acetylhexosamine pyrophosphorylase OS=Homo sapiens OX=9606 GN=UAP1 PE=1 SV=3	0	14.622	6	3	9	3	58.7	6.33	21.86	3.568	UAP1
High	IsMasterProtein	O14776	Transcription elongation regulator 1 OS=Homo sapiens OX=9606 GN=TCERG1 PE=1 SV=2	0	107.466	21	22	85	22	123.8	8.65	207.3	3.567	TCERG1
High	IsMasterProtein	P50991	T-complex protein 1 subunit delta OS=Homo sapiens OX=9606 GN=CCT4 PE=1 SV=4	0	249.908	62	26	165	25	57.9	7.83	460.79	3.564	CCT4
High	IsMasterProtein	Q8WXA9	Splicing regulatory glutamine/lysine-rich protein 1 OS=Homo sapiens OX=9606 GN=SREK1 PE=1 SV=1	0	41.515	13	4	17	4	59.3	10.39	56.34	3.559	SREK1
High	IsMasterProtein	P61158	Actin-related protein 3 OS=Homo sapiens OX=9606 GN=ACTR3 PE=1 SV=3	0	73.411	37	9	40	9	47.3	5.88	100.65	3.553	ACTR3
High	IsMasterProtein	Q04323	UBX domain-containing protein 1 OS=Homo sapiens OX=9606 GN=UBXN1 PE=1 SV=2	0	17.832	18	3	9	3	33.3	5.25	11.65	3.552	UBXN1
High	IsMasterProtein	Q9BWJ5	Splicing factor 3B subunit 5 OS=Homo sapiens OX=9606 GN=SF3B5 PE=1 SV=1	0	7.523	28	2	4	2	10.1	6.35	8.82	3.518	SF3B5
High	IsMasterProtein	Q99567	Nuclear pore complex protein Nup88 OS=Homo sapiens OX=9606 GN=NUP88 PE=1 SV=2	0	9.706	4	2	3	2	83.5	5.69	8	3.518	NUP88
High	IsMasterProtein	P48047	ATP synthase subunit O, mitochondrial OS=Homo sapiens OX=9606 GN=ATP5PO PE=1 SV=1	0	51.392	43	6	22	6	23.3	9.96	73.28	3.514	ATP5O
High	IsMasterProtein	Q14498	RNA-binding protein 39 OS=Homo sapiens OX=9606 GN=RBM39 PE=1 SV=2	0	91.221	34	12	70	12	59.3	10.1	191.57	3.512	RBM39
High	IsMasterProtein	P07741	Adenine phosphoribosyltransferase OS=Homo sapiens OX=9606 GN=APRT PE=1 SV=2	0	48.53	44	7	59	7	19.6	6.02	97.96	3.509	APRT
High	IsMasterProtein	A6NDG6	Glycerol-3-phosphate phosphatase OS=Homo sapiens OX=9606 GN=PGP PE=1 SV=1	0	42.577	29	6	20	6	34	6.14	41.2	3.507	PGP
High	IsMasterProtein	P23396	40S ribosomal protein S3 OS=Homo sapiens OX=9606 GN=RPS3 PE=1 SV=2	0	169.121	81	22	217	22	26.7	9.66	589.83	3.504	RPS3
High	IsMasterProtein	Q96HE7	ERO1-like protein alpha OS=Homo sapiens OX=9606 GN=ERO1A PE=1 SV=2	0	60.242	28	7	24	7	54.4	5.68	77.67	3.487	ERO1L; ERO1A
High	IsMasterProtein	P14923	Junction plakoglobin OS=Homo sapiens OX=9606 GN=JUP PE=1 SV=3	0	30.845	9	5	14	5	81.7	6.14	34.91	3.483	JUP
High	IsMasterProtein	O95757	Heat shock 70 kDa protein 4L OS=Homo sapiens OX=9606 GN=HSPA4L PE=1 SV=3	0	109.78	28	17	63	13	94.5	5.88	121.77	3.468	HSPA4L
High	IsMasterProtein	P14735	Insulin-degrading enzyme OS=Homo sapiens OX=9606 GN=IDE PE=1 SV=4	0	18.492	4	3	9	3	117.9	6.61	22.19	3.465	IDE
High	IsMasterProtein	P40227	T-complex protein 1 subunit zeta OS=Homo sapiens OX=9606 GN=CCT6A PE=1 SV=3	0	232.055	51	24	168	24	58	6.68	416.58	3.453	CCT6A
High	IsMasterProtein	P15927	Replication protein A 32 kDa subunit OS=Homo sapiens OX=9606 GN=RPA2 PE=1 SV=1	0	63.609	45	7	31	7	29.2	6.15	94.69	3.441	RPA2
High	IsMasterProtein	Q9UBE0	SUMO-activating enzyme subunit 1 OS=Homo sapiens OX=9606 GN=SAE1 PE=1 SV=1	0	39.388	22	5	20	5	38.4	5.3	38.28	3.417	SAE1
High	IsMasterProtein	P28838	Cytosol aminopeptidase OS=Homo sapiens OX=9606 GN=LAP3 PE=1 SV=3	0	43.735	22	8	25	8	56.1	7.93	65.76	3.412	LAP3
High	IsMasterProtein	O60231	Pre-mRNA-splicing factor ATP-dependent RNA helicase DHX16 OS=Homo sapiens OX=9606 GN=DHX16 PE=1 SV=2	0	24.467	3	3	10	2	119.2	6.8	26.81	3.399	DHX16
High	IsMasterProtein	O14773	Tripeptidyl-peptidase 1 OS=Homo sapiens OX=9606 GN=TPP1 PE=1 SV=2	0	15.961	7	2	5	2	61.2	6.48	15.56	3.396	TPP1
High	IsMasterProtein	Q7L0Y3	tRNA methyltransferase 10 homolog C OS=Homo sapiens OX=9606 GN=TRMT10C PE=1 SV=2	0	16.888	11	3	6	3	47.3	9.36	17.47	3.387	TRMT10C
High	IsMasterProtein	P07195	L-lactate dehydrogenase B chain OS=Homo sapiens OX=9606 GN=LDHB PE=1 SV=2	0	221.746	57	20	234	19	36.6	6.05	567.56	3.363	LDHB
High	IsMasterProtein	Q9H0A0	RNA cytidine acetyltransferase OS=Homo sapiens OX=9606 GN=NAT10 PE=1 SV=2	0	101.245	19	12	36	12	115.7	8.27	91.49	3.362	NAT10
High	IsMasterProtein	P38606	V-type proton ATPase catalytic subunit A OS=Homo sapiens OX=9606 GN=ATP6V1A PE=1 SV=2	0	67.484	17	9	23	9	68.3	5.52	66.98	3.361	ATP6V1A
High	IsMasterProtein	P28482	Mitogen-activated protein kinase 1 OS=Homo sapiens OX=9606 GN=MAPK1 PE=1 SV=3	0	23.628	18	4	7	3	41.4	6.98	20.53	3.357	MAPK1
High	IsMasterProtein	Q1KMD3	Heterogeneous nuclear ribonucleoprotein U-like protein 2 OS=Homo sapiens OX=9606 GN=HNRNPUL2 PE=1 SV=1	0	153.727	27	19	82	19	85.1	4.91	246.12	3.343	HNRNPUL2
High	IsMasterProtein	Q9GZR2	RNA exonuclease 4 OS=Homo sapiens OX=9606 GN=REXO4 PE=1 SV=2	0	12.331	8	3	4	3	46.6	9.77	7.14	3.338	REXO4
High	IsMasterProtein	P10809	60 kDa heat shock protein, mitochondrial OS=Homo sapiens OX=9606 GN=HSPD1 PE=1 SV=2	0	507.02	75	41	452	41	61	5.87	1103.03	3.331	HSPD1
High	IsMasterProtein	A0AVT1	Ubiquitin-like modifier-activating enzyme 6 OS=Homo sapiens OX=9606 GN=UBA6 PE=1 SV=1	0	9.722	2	2	3	2	117.9	6.14	6.72	3.317	UBA6
High	IsMasterProtein	Q9UNN5	FAS-associated factor 1 OS=Homo sapiens OX=9606 GN=FAF1 PE=1 SV=2	0	11.202	8	4	6	4	73.9	4.88	3.97	3.313	FAF1
High	IsMasterProtein	P38159	RNA-binding motif protein, X chromosome OS=Homo sapiens OX=9606 GN=RBMX PE=1 SV=3	0	84.837	33	12	86	12	42.3	10.05	243.51	3.312	RBMX
High	IsMasterProtein	P46782	40S ribosomal protein S5 OS=Homo sapiens OX=9606 GN=RPS5 PE=1 SV=4	0	80.407	47	11	95	11	22.9	9.72	284.34	3.304	RPS5
High	IsMasterProtein	P35658	Nuclear pore complex protein Nup214 OS=Homo sapiens OX=9606 GN=NUP214 PE=1 SV=2	0	34.312	4	6	15	6	213.5	7.47	26.14	3.304	NUP214
High	IsMasterProtein	P07237	Protein disulfide-isomerase OS=Homo sapiens OX=9606 GN=P4HB PE=1 SV=3	0	181.073	56	27	156	27	57.1	4.87	376.15	3.3	P4HB
High	IsMasterProtein	Q96AY3	Peptidyl-prolyl cis-trans isomerase FKBP10 OS=Homo sapiens OX=9606 GN=FKBP10 PE=1 SV=1	0	23.834	14	6	19	6	64.2	5.62	37.29	3.3	FKBP10
High	IsMasterProtein	P63010	AP-2 complex subunit beta OS=Homo sapiens OX=9606 GN=AP2B1 PE=1 SV=1	0	17.949	5	4	9	1	104.5	5.38	11.43	3.267	AP2B1
High	IsMasterProtein	P61160	Actin-related protein 2 OS=Homo sapiens OX=9606 GN=ACTR2 PE=1 SV=1	0	31.146	18	5	13	5	44.7	6.74	39.87	3.213	ACTR2
High	IsMasterProtein	Q9UNM6	26S proteasome non-ATPase regulatory subunit 13 OS=Homo sapiens OX=9606 GN=PSMD13 PE=1 SV=2	0	82.142	43	12	41	12	42.9	5.81	94.64	3.185	PSMD13
High	IsMasterProtein	Q96Q11	CCA tRNA nucleotidyltransferase 1, mitochondrial OS=Homo sapiens OX=9606 GN=TRNT1 PE=1 SV=2	0	4.406	5	2	4	2	50.1	8.1	0	3.18	TRNT1
High	IsMasterProtein	P52209	6-phosphogluconate dehydrogenase, decarboxylating OS=Homo sapiens OX=9606 GN=PGD PE=1 SV=3	0	103.116	34	14	53	14	53.1	7.23	132.27	3.179	PGD
High	IsMasterProtein	P60866	40S ribosomal protein S20 OS=Homo sapiens OX=9606 GN=RPS20 PE=1 SV=1	0	63.491	36	6	76	6	13.4	9.94	239.19	3.175	RPS20
High	IsMasterProtein	Q8NDH3	Probable aminopeptidase NPEPL1 OS=Homo sapiens OX=9606 GN=NPEPL1 PE=1 SV=3	0	21.916	10	3	7	3	55.8	6.87	11.43	3.171	NPEPL1
High	IsMasterProtein	Q07960	Rho GTPase-activating protein 1 OS=Homo sapiens OX=9606 GN=ARHGAP1 PE=1 SV=1	0	43.367	22	7	24	7	50.4	6.29	52.3	3.162	ARHGAP1
High	IsMasterProtein	O75821	Eukaryotic translation initiation factor 3 subunit G OS=Homo sapiens OX=9606 GN=EIF3G PE=1 SV=2	0	42.824	26	7	22	7	35.6	6.13	64.93	3.158	EIF3G
High	IsMasterProtein	P55039	Developmentally-regulated GTP-binding protein 2 OS=Homo sapiens OX=9606 GN=DRG2 PE=1 SV=1	0	8.597	9	2	3	2	40.7	8.88	4.54	3.155	DRG2
High	IsMasterProtein	Q01518	Adenylyl cyclase-associated protein 1 OS=Homo sapiens OX=9606 GN=CAP1 PE=1 SV=5	0	139.452	47	15	81	15	51.9	8.06	228.64	3.154	CAP1
High	IsMasterProtein	P23246	Splicing factor, proline- and glutamine-rich OS=Homo sapiens OX=9606 GN=SFPQ PE=1 SV=2	0	147.736	36	20	68	19	76.1	9.44	193	3.149	SFPQ
High	IsMasterProtein	Q9Y6K5	2'-5'-oligoadenylate synthase 3 OS=Homo sapiens OX=9606 GN=OAS3 PE=1 SV=3	0	17.282	4	4	8	4	121.1	8.4	15.94	3.135	OAS3
High	IsMasterProtein	Q7Z417	Nuclear fragile X mental retardation-interacting protein 2 OS=Homo sapiens OX=9606 GN=NUFIP2 PE=1 SV=1	0	17.511	6	3	5	3	76.1	8.7	14.59	3.128	NUFIP2
High	IsMasterProtein	P31153	S-adenosylmethionine synthase isoform type-2 OS=Homo sapiens OX=9606 GN=MAT2A PE=1 SV=1	0	98.703	41	14	65	14	43.6	6.48	150.33	3.113	MAT2A
High	IsMasterProtein	P47755	F-actin-capping protein subunit alpha-2 OS=Homo sapiens OX=9606 GN=CAPZA2 PE=1 SV=3	0	15.675	10	2	12	1	32.9	5.85	27.03	3.113	CAPZA2
High	IsMasterProtein	Q8WX92	Negative elongation factor B OS=Homo sapiens OX=9606 GN=NELFB PE=1 SV=1	0	7.89	4	3	11	3	65.7	6.13	9.19	3.112	COBRA1; NELFB
High	IsMasterProtein	P61088	Ubiquitin-conjugating enzyme E2 N OS=Homo sapiens OX=9606 GN=UBE2N PE=1 SV=1	0	26.546	38	5	23	5	17.1	6.57	53.08	3.105	UBE2N
High	IsMasterProtein	Q9NYU2	UDP-glucose:glycoprotein glucosyltransferase 1 OS=Homo sapiens OX=9606 GN=UGGT1 PE=1 SV=3	0	12.53	2	2	4	2	177.1	5.63	9.13	3.104	UGGT1
High	IsMasterProtein	O14732	Inositol monophosphatase 2 OS=Homo sapiens OX=9606 GN=IMPA2 PE=1 SV=1	0	17.231	15	3	7	3	31.3	6.61	18.22	3.101	IMPA2
High	IsMasterProtein	P48643	T-complex protein 1 subunit epsilon OS=Homo sapiens OX=9606 GN=CCT5 PE=1 SV=1	0	279.479	65	28	181	27	59.6	5.66	498.64	3.093	CCT5
High	IsMasterProtein	Q96EN8	Molybdenum cofactor sulfurase OS=Homo sapiens OX=9606 GN=MOCOS PE=1 SV=2	0	30.024	11	6	9	6	98.1	6.7	20.47	3.088	MOCOS
High	IsMasterProtein	P61204	ADP-ribosylation factor 3 OS=Homo sapiens OX=9606 GN=ARF3 PE=1 SV=2	0	71.378	55	9	55	4	20.6	7.43	115.06	3.087	ARF3
High	IsMasterProtein	Q5JWF2	Guanine nucleotide-binding protein G(s) subunit alpha isoforms XLas OS=Homo sapiens OX=9606 GN=GNAS PE=1 SV=2	0	10.251	5	3	5	2	111	5.03	8.8	3.086	GNAS
High	IsMasterProtein	Q6UN15	Pre-mRNA 3'-end-processing factor FIP1 OS=Homo sapiens OX=9606 GN=FIP1L1 PE=1 SV=1	0	6.008	5	2	4	2	66.5	5.59	3.71	3.082	FIP1L1
High	IsMasterProtein	Q92922	SWI/SNF complex subunit SMARCC1 OS=Homo sapiens OX=9606 GN=SMARCC1 PE=1 SV=3	0	22.007	5	4	17	3	122.8	5.76	36.07	3.076	SMARCC1
High	IsMasterProtein	Q5T200	Zinc finger CCCH domain-containing protein 13 OS=Homo sapiens OX=9606 GN=ZC3H13 PE=1 SV=1	0	18.465	3	3	5	3	196.5	9.42	17.29	3.076	ZC3H13
High	IsMasterProtein	Q8NBJ5	Procollagen galactosyltransferase 1 OS=Homo sapiens OX=9606 GN=COLGALT1 PE=1 SV=1	0	57.803	22	11	29	11	71.6	7.31	71	3.07	COLGALT1; GLT25D1
High	IsMasterProtein	P31930	Cytochrome b-c1 complex subunit 1, mitochondrial OS=Homo sapiens OX=9606 GN=UQCRC1 PE=1 SV=3	0	37.082	21	6	11	6	52.6	6.37	40.67	3.068	UQCRC1
High	IsMasterProtein	Q6UXN9	WD repeat-containing protein 82 OS=Homo sapiens OX=9606 GN=WDR82 PE=1 SV=1	0	5.93	13	2	3	2	35.1	7.69	4.32	3.068	WDR82
High	IsMasterProtein	Q13501	Sequestosome-1 OS=Homo sapiens OX=9606 GN=SQSTM1 PE=1 SV=1	0	30.275	16	3	8	3	47.7	5.22	31.62	3.063	SQSTM1
High	IsMasterProtein	P30044	Peroxiredoxin-5, mitochondrial OS=Homo sapiens OX=9606 GN=PRDX5 PE=1 SV=4	0	73.904	56	10	45	10	22.1	8.7	109.61	3.062	PRDX5
High	IsMasterProtein	O15305	Phosphomannomutase 2 OS=Homo sapiens OX=9606 GN=PMM2 PE=1 SV=1	0	17.482	18	4	9	4	28.1	6.77	20.81	3.062	PMM2
High	IsMasterProtein	Q04760	Lactoylglutathione lyase OS=Homo sapiens OX=9606 GN=GLO1 PE=1 SV=4	0	57.254	58	8	44	8	20.8	5.31	105.66	3.061	GLO1
High	IsMasterProtein	Q9UMY4	Sorting nexin-12 OS=Homo sapiens OX=9606 GN=SNX12 PE=1 SV=4	0	29.122	56	7	22	6	18.9	8.44	39.12	3.05	SNX12
High	IsMasterProtein	P61106	Ras-related protein Rab-14 OS=Homo sapiens OX=9606 GN=RAB14 PE=1 SV=4	0	53.53	50	8	18	7	23.9	6.21	45.33	3.046	RAB14
High	IsMasterProtein	P14324	Farnesyl pyrophosphate synthase OS=Homo sapiens OX=9606 GN=FDPS PE=1 SV=4	0	85.889	26	8	53	8	48.2	6.15	140.87	3.043	FDPS
High	IsMasterProtein	Q7Z2W4	Zinc finger CCCH-type antiviral protein 1 OS=Homo sapiens OX=9606 GN=ZC3HAV1 PE=1 SV=3	0	31.109	8	4	8	4	101.4	8.4	30.7	3.042	ZC3HAV1
High	IsMasterProtein	P54578	Ubiquitin carboxyl-terminal hydrolase 14 OS=Homo sapiens OX=9606 GN=USP14 PE=1 SV=3	0	66.739	29	9	31	9	56	5.3	86.64	3.04	USP14
High	IsMasterProtein	Q9UQ80	Proliferation-associated protein 2G4 OS=Homo sapiens OX=9606 GN=PA2G4 PE=1 SV=3	0	252.482	75	28	297	28	43.8	6.55	572.35	3.037	PA2G4
High	IsMasterProtein	P43686	26S proteasome regulatory subunit 6B OS=Homo sapiens OX=9606 GN=PSMC4 PE=1 SV=2	0	98.439	47	13	63	12	47.3	5.21	178.38	3.034	PSMC4
High	IsMasterProtein	P55735	Protein SEC13 homolog OS=Homo sapiens OX=9606 GN=SEC13 PE=1 SV=3	0	30.412	16	3	11	3	35.5	5.48	35.49	3.019	SEC13
High	IsMasterProtein	P08865	40S ribosomal protein SA OS=Homo sapiens OX=9606 GN=RPSA PE=1 SV=4	0	142.223	55	13	102	13	32.8	4.87	371.86	3.018	RPSA
High	IsMasterProtein	Q13283	Ras GTPase-activating protein-binding protein 1 OS=Homo sapiens OX=9606 GN=G3BP1 PE=1 SV=1	0	147.075	52	15	89	15	52.1	5.52	244.9	3.015	G3BP1
High	IsMasterProtein	P07203	Glutathione peroxidase 1 OS=Homo sapiens OX=9606 GN=GPX1 PE=1 SV=4	0	34.053	43	6	16	6	22.1	6.55	42.35	3.011	GPX1
High	IsMasterProtein	Q9BQA1	Methylosome protein 50 OS=Homo sapiens OX=9606 GN=WDR77 PE=1 SV=1	0	21.807	17	4	8	4	36.7	5.17	16.47	2.999	WDR77
High	IsMasterProtein	P62249	40S ribosomal protein S16 OS=Homo sapiens OX=9606 GN=RPS16 PE=1 SV=2	0	91.13	56	11	138	11	16.4	10.21	363.59	2.989	RPS16
High	IsMasterProtein	O43399	Tumor protein D54 OS=Homo sapiens OX=9606 GN=TPD52L2 PE=1 SV=2	0	74.827	67	10	38	10	22.2	5.36	101.92	2.982	TPD52L2
High	IsMasterProtein	P55769	NHP2-like protein 1 OS=Homo sapiens OX=9606 GN=SNU13 PE=1 SV=3	0	11.687	19	2	7	2	14.2	8.46	21.4	2.964	NHP2L1; SNU13
High	IsMasterProtein	O95336	6-phosphogluconolactonase OS=Homo sapiens OX=9606 GN=PGLS PE=1 SV=2	0	88.576	52	9	30	9	27.5	6.05	78.71	2.961	PGLS
High	IsMasterProtein	P05023	Sodium/potassium-transporting ATPase subunit alpha-1 OS=Homo sapiens OX=9606 GN=ATP1A1 PE=1 SV=1	0	73.892	15	10	24	10	112.8	5.49	59.21	2.961	ATP1A1
High	IsMasterProtein	O15355	Protein phosphatase 1G OS=Homo sapiens OX=9606 GN=PPM1G PE=1 SV=1	0	82.533	30	10	31	10	59.2	4.36	81.62	2.96	PPM1G
High	IsMasterProtein	O43719	HIV Tat-specific factor 1 OS=Homo sapiens OX=9606 GN=HTATSF1 PE=1 SV=1	0	46.339	11	7	19	7	85.8	4.4	57.38	2.959	HTATSF1
High	IsMasterProtein	P02545	Prelamin-A/C OS=Homo sapiens OX=9606 GN=LMNA PE=1 SV=1	0	197.778	44	27	104	27	74.1	7.02	284.5	2.948	LMNA
High	IsMasterProtein	Q12873	Chromodomain-helicase-DNA-binding protein 3 OS=Homo sapiens OX=9606 GN=CHD3 PE=1 SV=3	0	26.152	2	4	12	1	226.5	7.3	29.82	2.94	CHD3
High	IsMasterProtein	O60841	Eukaryotic translation initiation factor 5B OS=Homo sapiens OX=9606 GN=EIF5B PE=1 SV=4	0	400.471	42	43	195	43	138.7	5.49	547.62	2.933	EIF5B
High	IsMasterProtein	P22061	Protein-L-isoaspartate(D-aspartate) O-methyltransferase OS=Homo sapiens OX=9606 GN=PCMT1 PE=1 SV=4	0	40.602	41	6	17	6	24.6	7.21	59.23	2.927	PCMT1
High	IsMasterProtein	P30876	DNA-directed RNA polymerase II subunit RPB2 OS=Homo sapiens OX=9606 GN=POLR2B PE=1 SV=1	0	47.57	10	7	12	7	133.8	6.87	37.09	2.917	POLR2B
High	IsMasterProtein	P49189	4-trimethylaminobutyraldehyde dehydrogenase OS=Homo sapiens OX=9606 GN=ALDH9A1 PE=1 SV=3	0	50.928	22	9	33	9	53.8	5.87	74.64	2.916	ALDH9A1
High	IsMasterProtein	Q96EY4	Translation machinery-associated protein 16 OS=Homo sapiens OX=9606 GN=TMA16 PE=1 SV=2	0	31.313	22	3	19	3	23.8	9.26	58.48	2.915	TMA16
High	IsMasterProtein	P15880	40S ribosomal protein S2 OS=Homo sapiens OX=9606 GN=RPS2 PE=1 SV=2	0	144.612	55	16	214	16	31.3	10.24	548.07	2.913	RPS2
High	IsMasterProtein	P35269	General transcription factor IIF subunit 1 OS=Homo sapiens OX=9606 GN=GTF2F1 PE=1 SV=2	0	110.245	30	12	35	12	58.2	7.49	132.4	2.909	GTF2F1
High	IsMasterProtein	Q14103	Heterogeneous nuclear ribonucleoprotein D0 OS=Homo sapiens OX=9606 GN=HNRNPD PE=1 SV=1	0	125.299	42	18	99	15	38.4	7.81	268.93	2.908	HNRNPD
High	IsMasterProtein	Q9C0C9	(E3-independent) E2 ubiquitin-conjugating enzyme OS=Homo sapiens OX=9606 GN=UBE2O PE=1 SV=3	0	28.117	5	5	12	5	141.2	5.12	14.95	2.907	UBE2O
High	IsMasterProtein	Q9BVJ6	U3 small nucleolar RNA-associated protein 14 homolog A OS=Homo sapiens OX=9606 GN=UTP14A PE=1 SV=1	0	21.741	9	4	12	4	87.9	7.87	34.16	2.905	UTP14A
High	IsMasterProtein	O95433	Activator of 90 kDa heat shock protein ATPase homolog 1 OS=Homo sapiens OX=9606 GN=AHSA1 PE=1 SV=1	0	67.674	25	7	28	7	38.3	5.53	94.4	2.898	AHSA1
High	IsMasterProtein	P14618	Pyruvate kinase PKM OS=Homo sapiens OX=9606 GN=PKM PE=1 SV=4	0	847.201	76	43	1341	43	57.9	7.84	3407.6	2.893	PKM
High	IsMasterProtein	P07384	Calpain-1 catalytic subunit OS=Homo sapiens OX=9606 GN=CAPN1 PE=1 SV=1	0	52.474	22	10	29	10	81.8	5.67	64.19	2.89	CAPN1
High	IsMasterProtein	Q9NQG5	Regulation of nuclear pre-mRNA domain-containing protein 1B OS=Homo sapiens OX=9606 GN=RPRD1B PE=1 SV=1	0	12.846	8	2	6	2	36.9	5.97	13.18	2.882	RPRD1B
High	IsMasterProtein	O00267	Transcription elongation factor SPT5 OS=Homo sapiens OX=9606 GN=SUPT5H PE=1 SV=1	0	60.356	14	9	17	9	120.9	5.06	54.78	2.874	SUPT5H
High	IsMasterProtein	P62750	60S ribosomal protein L23a OS=Homo sapiens OX=9606 GN=RPL23A PE=1 SV=1	0	159.319	54	15	433	15	17.7	10.45	757.54	2.871	RPL23A
High	IsMasterProtein	Q8NE71	ATP-binding cassette sub-family F member 1 OS=Homo sapiens OX=9606 GN=ABCF1 PE=1 SV=2	0	208.881	48	24	98	24	95.9	6.8	309.23	2.869	ABCF1
High	IsMasterProtein	Q9NWT1	p21-activated protein kinase-interacting protein 1 OS=Homo sapiens OX=9606 GN=PAK1IP1 PE=1 SV=2	0	45.695	16	6	21	6	43.9	8.91	55.44	2.867	PAK1IP1
High	IsMasterProtein	P16070	CD44 antigen OS=Homo sapiens OX=9606 GN=CD44 PE=1 SV=3	0	31.807	6	3	10	3	81.5	5.33	32.97	2.862	CD44
High	IsMasterProtein	P14384	Carboxypeptidase M OS=Homo sapiens OX=9606 GN=CPM PE=1 SV=2	0	14.993	7	2	7	2	50.5	7.36	16.22	2.86	CPM
High	IsMasterProtein	Q15056	Eukaryotic translation initiation factor 4H OS=Homo sapiens OX=9606 GN=EIF4H PE=1 SV=5	0	13.229	21	2	5	2	27.4	7.23	12.16	2.859	EIF4H
High	IsMasterProtein	Q14141	Septin-6 OS=Homo sapiens OX=9606 GN=SEPTIN6 PE=1 SV=4	0	18.058	11	4	20	3	49.7	6.67	31.91	2.856	2020-09-06
High	IsMasterProtein	O14744	Protein arginine N-methyltransferase 5 OS=Homo sapiens OX=9606 GN=PRMT5 PE=1 SV=4	0	35.211	19	8	30	8	72.6	6.29	43.08	2.849	PRMT5
High	IsMasterProtein	Q99733	Nucleosome assembly protein 1-like 4 OS=Homo sapiens OX=9606 GN=NAP1L4 PE=1 SV=1	0	49.39	21	7	37	5	42.8	4.69	83.58	2.846	NAP1L4
High	IsMasterProtein	Q8NF37	Lysophosphatidylcholine acyltransferase 1 OS=Homo sapiens OX=9606 GN=LPCAT1 PE=1 SV=2	0	20.7	7	3	8	3	59.1	6.02	16.98	2.846	LPCAT1
High	IsMasterProtein	P11802	Cyclin-dependent kinase 4 OS=Homo sapiens OX=9606 GN=CDK4 PE=1 SV=2	0	34.312	31	7	19	6	33.7	7.01	41.2	2.842	CDK4
High	IsMasterProtein	Q99714	3-hydroxyacyl-CoA dehydrogenase type-2 OS=Homo sapiens OX=9606 GN=HSD17B10 PE=1 SV=3	0	144.926	68	10	80	10	26.9	7.78	236.8	2.819	HSD17B10
High	IsMasterProtein	Q9ULV4	Coronin-1C OS=Homo sapiens OX=9606 GN=CORO1C PE=1 SV=1	0	54.319	29	8	20	8	53.2	7.08	63.67	2.807	CORO1C
High	IsMasterProtein	P54886	Delta-1-pyrroline-5-carboxylate synthase OS=Homo sapiens OX=9606 GN=ALDH18A1 PE=1 SV=2	0	23.407	8	4	8	4	87.2	7.12	14.41	2.799	ALDH18A1
High	IsMasterProtein	Q05048	Cleavage stimulation factor subunit 1 OS=Homo sapiens OX=9606 GN=CSTF1 PE=1 SV=1	0	19.687	12	4	8	4	48.3	6.58	20.4	2.799	CSTF1
High	IsMasterProtein	O15042	U2 snRNP-associated SURP motif-containing protein OS=Homo sapiens OX=9606 GN=U2SURP PE=1 SV=2	0	71.246	16	11	27	11	118.2	8.47	77.93	2.792	U2SURP
High	IsMasterProtein	Q96KP4	Cytosolic non-specific dipeptidase OS=Homo sapiens OX=9606 GN=CNDP2 PE=1 SV=2	0	75.634	34	11	42	11	52.8	5.97	80.36	2.788	CNDP2
High	IsMasterProtein	Q13098	COP9 signalosome complex subunit 1 OS=Homo sapiens OX=9606 GN=GPS1 PE=1 SV=4	0	29.947	17	6	12	6	55.5	6.74	22.44	2.781	GPS1
High	IsMasterProtein	Q99439	Calponin-2 OS=Homo sapiens OX=9606 GN=CNN2 PE=1 SV=4	0	6.555	8	2	2	2	33.7	7.33	3.61	2.779	CNN2
High	IsMasterProtein	P62136	Serine/threonine-protein phosphatase PP1-alpha catalytic subunit OS=Homo sapiens OX=9606 GN=PPP1CA PE=1 SV=1	0	128.859	53	14	70	2	37.5	6.33	186.19	2.771	PPP1CA
High	IsMasterProtein	P52597	Heterogeneous nuclear ribonucleoprotein F OS=Homo sapiens OX=9606 GN=HNRNPF PE=1 SV=3	0	105.971	44	11	66	9	45.6	5.58	178.47	2.764	HNRNPF
High	IsMasterProtein	Q9H9Q2	COP9 signalosome complex subunit 7b OS=Homo sapiens OX=9606 GN=COPS7B PE=1 SV=1	0	8.884	12	2	5	2	29.6	6.15	5.26	2.756	COPS7B
High	IsMasterProtein	Q9H7N4	Splicing factor, arginine/serine-rich 19 OS=Homo sapiens OX=9606 GN=SCAF1 PE=1 SV=3	0	3.752	1	2	4	2	139.2	9.25	3.82	2.747	SCAF1
High	IsMasterProtein	Q9BT73	Proteasome assembly chaperone 3 OS=Homo sapiens OX=9606 GN=PSMG3 PE=1 SV=1	0	11.321	30	2	2	2	13.1	7.88	6.35	2.737	PSMG3
High	IsMasterProtein	P17612	cAMP-dependent protein kinase catalytic subunit alpha OS=Homo sapiens OX=9606 GN=PRKACA PE=1 SV=2	0	17.01	18	4	10	4	40.6	8.79	13.44	2.732	PRKACA
High	IsMasterProtein	Q9Y230	RuvB-like 2 OS=Homo sapiens OX=9606 GN=RUVBL2 PE=1 SV=3	0	143.537	48	18	92	18	51.1	5.64	232.92	2.731	RUVBL2
High	IsMasterProtein	O75369	Filamin-B OS=Homo sapiens OX=9606 GN=FLNB PE=1 SV=2	0	726.152	50	93	440	84	278	5.73	1153.29	2.72	FLNB
High	IsMasterProtein	Q9UBW8	COP9 signalosome complex subunit 7a OS=Homo sapiens OX=9606 GN=COPS7A PE=1 SV=1	0	17.58	16	3	8	3	30.3	8.22	15.9	2.713	COPS7A
High	IsMasterProtein	P59998	Actin-related protein 2/3 complex subunit 4 OS=Homo sapiens OX=9606 GN=ARPC4 PE=1 SV=3	0	24.92	53	7	17	7	19.7	8.43	40.14	2.684	ARPC4
High	IsMasterProtein	Q6UVK1	Chondroitin sulfate proteoglycan 4 OS=Homo sapiens OX=9606 GN=CSPG4 PE=1 SV=2	0	29.801	2	4	7	4	250.4	5.47	17.79	2.676	CSPG4
High	IsMasterProtein	Q9NQW7	Xaa-Pro aminopeptidase 1 OS=Homo sapiens OX=9606 GN=XPNPEP1 PE=1 SV=3	0	50.992	18	7	28	7	69.9	5.67	38.23	2.674	XPNPEP1
High	IsMasterProtein	Q14232	Translation initiation factor eIF-2B subunit alpha OS=Homo sapiens OX=9606 GN=EIF2B1 PE=1 SV=1	0	38.72	36	8	21	8	33.7	7.33	30.31	2.668	EIF2B1
High	IsMasterProtein	P06733	Alpha-enolase OS=Homo sapiens OX=9606 GN=ENO1 PE=1 SV=2	0	759.176	80	39	1701	33	47.1	7.39	4053.81	2.659	ENO1
High	IsMasterProtein	Q13177	Serine/threonine-protein kinase PAK 2 OS=Homo sapiens OX=9606 GN=PAK2 PE=1 SV=3	0	59.169	31	11	29	11	58	5.96	50	2.652	PAK2
High	IsMasterProtein	O43823	A-kinase anchor protein 8 OS=Homo sapiens OX=9606 GN=AKAP8 PE=1 SV=1	0	10.723	7	3	8	3	76.1	5.15	9.39	2.647	AKAP8
High	IsMasterProtein	P53004	Biliverdin reductase A OS=Homo sapiens OX=9606 GN=BLVRA PE=1 SV=2	0	30.045	26	5	21	5	33.4	6.44	43.81	2.643	BLVRA
High	IsMasterProtein	Q15819	Ubiquitin-conjugating enzyme E2 variant 2 OS=Homo sapiens OX=9606 GN=UBE2V2 PE=1 SV=4	0	20.261	30	4	22	1	16.4	8.09	44.76	2.642	UBE2V2
High	IsMasterProtein	P49419	Alpha-aminoadipic semialdehyde dehydrogenase OS=Homo sapiens OX=9606 GN=ALDH7A1 PE=1 SV=5	0	125.32	36	16	59	16	58.5	7.99	154.56	2.64	ALDH7A1
High	IsMasterProtein	Q9Y295	Developmentally-regulated GTP-binding protein 1 OS=Homo sapiens OX=9606 GN=DRG1 PE=1 SV=1	0	11.116	8	2	4	2	40.5	8.9	12.26	2.639	DRG1
High	IsMasterProtein	O43707	Alpha-actinin-4 OS=Homo sapiens OX=9606 GN=ACTN4 PE=1 SV=2	0	302.099	50	35	178	23	104.8	5.44	537.59	2.635	ACTN4
High	IsMasterProtein	P26196	Probable ATP-dependent RNA helicase DDX6 OS=Homo sapiens OX=9606 GN=DDX6 PE=1 SV=2	0	25.429	10	3	12	3	54.4	8.66	28.18	2.634	DDX6
High	IsMasterProtein	P35998	26S proteasome regulatory subunit 7 OS=Homo sapiens OX=9606 GN=PSMC2 PE=1 SV=3	0	88.933	48	18	46	18	48.6	5.95	90.83	2.614	PSMC2
High	IsMasterProtein	Q01433	AMP deaminase 2 OS=Homo sapiens OX=9606 GN=AMPD2 PE=1 SV=2	0	6.777	3	2	4	2	100.6	6.93	6.53	2.603	AMPD2
High	IsMasterProtein	Q9Y221	60S ribosome subunit biogenesis protein NIP7 homolog OS=Homo sapiens OX=9606 GN=NIP7 PE=1 SV=1	0	38.194	35	4	20	4	20.4	8.51	58.54	2.588	NIP7
High	IsMasterProtein	P13797	Plastin-3 OS=Homo sapiens OX=9606 GN=PLS3 PE=1 SV=4	0	227.397	56	28	141	24	70.8	5.6	388.87	2.579	PLS3
High	IsMasterProtein	Q9UL40	Zinc finger protein 346 OS=Homo sapiens OX=9606 GN=ZNF346 PE=1 SV=1	0	5.591	10	2	3	2	32.9	9.09	4.08	2.579	ZNF346
High	IsMasterProtein	Q15050	Ribosome biogenesis regulatory protein homolog OS=Homo sapiens OX=9606 GN=RRS1 PE=1 SV=2	0	101.179	29	11	69	11	41.2	10.7	193.62	2.564	RRS1
High	IsMasterProtein	P04844	Dolichyl-diphosphooligosaccharide--protein glycosyltransferase subunit 2 OS=Homo sapiens OX=9606 GN=RPN2 PE=1 SV=3	0	73.022	27	8	22	8	69.2	5.69	69.13	2.559	RPN2
High	IsMasterProtein	Q7L2J0	7SK snRNA methylphosphate capping enzyme OS=Homo sapiens OX=9606 GN=MEPCE PE=1 SV=1	0	20.284	10	5	10	5	74.3	9.57	18.32	2.559	MEPCE
High	IsMasterProtein	P17931	Galectin-3 OS=Homo sapiens OX=9606 GN=LGALS3 PE=1 SV=5	0	32.992	26	5	22	5	26.1	8.56	59.3	2.554	LGALS3
High	IsMasterProtein	P27361	Mitogen-activated protein kinase 3 OS=Homo sapiens OX=9606 GN=MAPK3 PE=1 SV=4	0	16.538	11	3	6	2	43.1	6.74	17.44	2.546	MAPK3
High	IsMasterProtein	O43148	mRNA cap guanine-N7 methyltransferase OS=Homo sapiens OX=9606 GN=RNMT PE=1 SV=1	0	38.464	20	6	20	6	54.8	6.61	35.85	2.544	RNMT
High	IsMasterProtein	P63241	Eukaryotic translation initiation factor 5A-1 OS=Homo sapiens OX=9606 GN=EIF5A PE=1 SV=2	0	189.572	72	15	124	15	16.8	5.24	377.14	2.543	EIF5A
High	IsMasterProtein	Q16719	Kynureninase OS=Homo sapiens OX=9606 GN=KYNU PE=1 SV=1	0	162.788	43	16	88	16	52.3	7.03	209.27	2.539	KYNU
High	IsMasterProtein	P82970	High mobility group nucleosome-binding domain-containing protein 5 OS=Homo sapiens OX=9606 GN=HMGN5 PE=1 SV=1	0	100.258	30	10	49	10	31.5	4.55	149.28	2.53	HMGN5
High	IsMasterProtein	P13667	Protein disulfide-isomerase A4 OS=Homo sapiens OX=9606 GN=PDIA4 PE=1 SV=2	0	46.876	16	8	21	8	72.9	5.07	46.56	2.526	PDIA4
High	IsMasterProtein	P52888	Thimet oligopeptidase OS=Homo sapiens OX=9606 GN=THOP1 PE=1 SV=2	0	25.993	10	5	7	5	78.8	6.05	19.04	2.518	THOP1
High	IsMasterProtein	Q12904	Aminoacyl tRNA synthase complex-interacting multifunctional protein 1 OS=Homo sapiens OX=9606 GN=AIMP1 PE=1 SV=2	0	68.277	50	9	25	9	34.3	8.43	73.67	2.509	AIMP1
High	IsMasterProtein	Q8TBC4	NEDD8-activating enzyme E1 catalytic subunit OS=Homo sapiens OX=9606 GN=UBA3 PE=1 SV=2	0	23.984	17	4	6	4	51.8	5.45	14.19	2.499	UBA3
High	IsMasterProtein	P46060	Ran GTPase-activating protein 1 OS=Homo sapiens OX=9606 GN=RANGAP1 PE=1 SV=1	0	57.008	28	10	28	10	63.5	4.68	62.03	2.494	RANGAP1
High	IsMasterProtein	P78417	Glutathione S-transferase omega-1 OS=Homo sapiens OX=9606 GN=GSTO1 PE=1 SV=2	0	53.631	49	11	64	11	27.5	6.6	145.38	2.483	GSTO1
High	IsMasterProtein	P54819	Adenylate kinase 2, mitochondrial OS=Homo sapiens OX=9606 GN=AK2 PE=1 SV=2	0	16.549	15	2	9	2	26.5	7.81	26.27	2.481	AK2
High	IsMasterProtein	Q9UKD2	mRNA turnover protein 4 homolog OS=Homo sapiens OX=9606 GN=MRTO4 PE=1 SV=2	0	35.842	39	7	20	7	27.5	8.29	39.98	2.476	MRTO4
High	IsMasterProtein	Q13596	Sorting nexin-1 OS=Homo sapiens OX=9606 GN=SNX1 PE=1 SV=3	0	24.61	11	5	15	4	59	5.15	30.7	2.476	SNX1
High	IsMasterProtein	O75340	Programmed cell death protein 6 OS=Homo sapiens OX=9606 GN=PDCD6 PE=1 SV=1	0	55.823	41	7	41	7	21.9	5.4	86.4	2.474	PDCD6
High	IsMasterProtein	P21333	Filamin-A OS=Homo sapiens OX=9606 GN=FLNA PE=1 SV=4	0	864.281	50	94	533	85	280.6	6.06	1493.61	2.473	FLNA
High	IsMasterProtein	Q5VTL8	Pre-mRNA-splicing factor 38B OS=Homo sapiens OX=9606 GN=PRPF38B PE=1 SV=1	0	32.458	13	6	14	6	64.4	10.54	24.43	2.459	PRPF38B
High	IsMasterProtein	P12814	Alpha-actinin-1 OS=Homo sapiens OX=9606 GN=ACTN1 PE=1 SV=2	0	158.367	32	22	103	10	103	5.41	272.52	2.457	ACTN1
High	IsMasterProtein	Q96C86	m7GpppX diphosphatase OS=Homo sapiens OX=9606 GN=DCPS PE=1 SV=2	0	43.044	28	7	18	7	38.6	6.38	35.65	2.456	DCPS
High	IsMasterProtein	Q13200	26S proteasome non-ATPase regulatory subunit 2 OS=Homo sapiens OX=9606 GN=PSMD2 PE=1 SV=3	0	136.576	31	18	58	18	100.1	5.2	138.88	2.439	PSMD2
High	IsMasterProtein	Q5H9R7	Serine/threonine-protein phosphatase 6 regulatory subunit 3 OS=Homo sapiens OX=9606 GN=PPP6R3 PE=1 SV=2	0	27.143	7	5	12	5	97.6	4.6	33.6	2.436	PPP6R3
High	IsMasterProtein	Q8TCS8	Polyribonucleotide nucleotidyltransferase 1, mitochondrial OS=Homo sapiens OX=9606 GN=PNPT1 PE=1 SV=2	0	21.178	7	4	10	4	85.9	7.77	25.21	2.43	PNPT1
High	IsMasterProtein	Q86XP3	ATP-dependent RNA helicase DDX42 OS=Homo sapiens OX=9606 GN=DDX42 PE=1 SV=1	0	36.954	13	8	21	8	102.9	7.02	32.76	2.428	DDX42
High	IsMasterProtein	Q13564	NEDD8-activating enzyme E1 regulatory subunit OS=Homo sapiens OX=9606 GN=NAE1 PE=1 SV=1	0	13.484	7	2	3	2	60.2	5.4	4.57	2.422	NAE1
High	IsMasterProtein	Q8N684	Cleavage and polyadenylation specificity factor subunit 7 OS=Homo sapiens OX=9606 GN=CPSF7 PE=1 SV=1	0	38.142	20	7	27	7	52	8	38.48	2.419	CPSF7
High	IsMasterProtein	O60684	Importin subunit alpha-7 OS=Homo sapiens OX=9606 GN=KPNA6 PE=1 SV=1	0	40.161	18	8	24	4	60	4.98	58.92	2.407	KPNA6
High	IsMasterProtein	P10515	Dihydrolipoyllysine-residue acetyltransferase component of pyruvate dehydrogenase complex, mitochondrial OS=Homo sapiens OX=9606 GN=DLAT PE=1 SV=3	0	32.405	12	4	11	4	69	7.84	26.07	2.403	DLAT
High	IsMasterProtein	P51532	Transcription activator BRG1 OS=Homo sapiens OX=9606 GN=SMARCA4 PE=1 SV=2	0	6.192	2	2	4	2	184.5	7.88	3.98	2.4	SMARCA4
High	IsMasterProtein	Q53EL6	Programmed cell death protein 4 OS=Homo sapiens OX=9606 GN=PDCD4 PE=1 SV=2	0	56.235	25	7	25	7	51.7	5.21	74.31	2.398	PDCD4
High	IsMasterProtein	Q96HR8	H/ACA ribonucleoprotein complex non-core subunit NAF1 OS=Homo sapiens OX=9606 GN=NAF1 PE=1 SV=2	0	20.113	8	3	9	3	53.7	4.87	18.05	2.396	NAF1
High	IsMasterProtein	Q15424	Scaffold attachment factor B1 OS=Homo sapiens OX=9606 GN=SAFB PE=1 SV=4	0	153.08	22	19	78	10	102.6	5.47	232.25	2.39	SAFB
High	IsMasterProtein	Q92769	Histone deacetylase 2 OS=Homo sapiens OX=9606 GN=HDAC2 PE=1 SV=2	0	32.748	14	5	20	2	55.3	5.91	52.49	2.381	HDAC2
High	IsMasterProtein	P22102	Trifunctional purine biosynthetic protein adenosine-3 OS=Homo sapiens OX=9606 GN=GART PE=1 SV=1	0	184.422	35	26	117	26	107.7	6.7	316.55	2.37	GART
High	IsMasterProtein	P30048	Thioredoxin-dependent peroxide reductase, mitochondrial OS=Homo sapiens OX=9606 GN=PRDX3 PE=1 SV=3	0	40.854	32	5	21	5	27.7	7.78	57.99	2.366	PRDX3
High	IsMasterProtein	Q13347	Eukaryotic translation initiation factor 3 subunit I OS=Homo sapiens OX=9606 GN=EIF3I PE=1 SV=1	0	59.825	37	8	23	8	36.5	5.64	67.95	2.36	EIF3I
High	IsMasterProtein	Q9UL46	Proteasome activator complex subunit 2 OS=Homo sapiens OX=9606 GN=PSME2 PE=1 SV=4	0	112.533	61	11	69	11	27.4	5.73	182.75	2.351	PSME2
High	IsMasterProtein	Q99729	Heterogeneous nuclear ribonucleoprotein A/B OS=Homo sapiens OX=9606 GN=HNRNPAB PE=1 SV=2	0	56.083	29	10	65	9	36.2	8.21	148.75	2.351	HNRNPAB
High	IsMasterProtein	Q15637	Splicing factor 1 OS=Homo sapiens OX=9606 GN=SF1 PE=1 SV=4	0	32.281	14	5	9	5	68.3	8.98	22.35	2.346	SF1
High	IsMasterProtein	P42677	40S ribosomal protein S27 OS=Homo sapiens OX=9606 GN=RPS27 PE=1 SV=3	0	44.585	40	4	53	2	9.5	9.45	146.11	2.34	RPS27
High	IsMasterProtein	Q9H7B2	Ribosome production factor 2 homolog OS=Homo sapiens OX=9606 GN=RPF2 PE=1 SV=2	0	73.379	40	9	53	9	35.6	9.99	125.26	2.334	RPF2
High	IsMasterProtein	P12956	X-ray repair cross-complementing protein 6 OS=Homo sapiens OX=9606 GN=XRCC6 PE=1 SV=2	0	229.543	52	25	158	25	69.8	6.64	387.15	2.331	XRCC6
High	IsMasterProtein	Q9UMR2	ATP-dependent RNA helicase DDX19B OS=Homo sapiens OX=9606 GN=DDX19B PE=1 SV=1	0	62.846	21	7	20	1	53.9	6.3	70.67	2.328	DDX19B
High	IsMasterProtein	P34949	Mannose-6-phosphate isomerase OS=Homo sapiens OX=9606 GN=MPI PE=1 SV=2	0	46.553	29	6	14	6	46.6	5.95	43.99	2.325	MPI
High	IsMasterProtein	P30041	Peroxiredoxin-6 OS=Homo sapiens OX=9606 GN=PRDX6 PE=1 SV=3	0	144.579	67	17	154	17	25	6.38	384.15	2.311	PRDX6
High	IsMasterProtein	O60763	General vesicular transport factor p115 OS=Homo sapiens OX=9606 GN=USO1 PE=1 SV=2	0	16.237	6	4	6	4	107.8	4.91	18.21	2.31	USO1
High	IsMasterProtein	O15145	Actin-related protein 2/3 complex subunit 3 OS=Homo sapiens OX=9606 GN=ARPC3 PE=1 SV=3	0	13.76	19	4	12	4	20.5	8.59	11.54	2.309	ARPC3
High	IsMasterProtein	P08670	Vimentin OS=Homo sapiens OX=9606 GN=VIM PE=1 SV=4	0	262.61	73	32	169	29	53.6	5.12	473.42	2.306	VIM
High	IsMasterProtein	P22695	Cytochrome b-c1 complex subunit 2, mitochondrial OS=Homo sapiens OX=9606 GN=UQCRC2 PE=1 SV=3	0	31.461	23	6	16	6	48.4	8.63	42.82	2.306	UQCRC2
High	IsMasterProtein	Q8TC07	TBC1 domain family member 15 OS=Homo sapiens OX=9606 GN=TBC1D15 PE=1 SV=2	0	11.769	3	2	5	2	79.4	5.67	8.57	2.297	TBC1D15
High	IsMasterProtein	P62495	Eukaryotic peptide chain release factor subunit 1 OS=Homo sapiens OX=9606 GN=ETF1 PE=1 SV=3	0	56.272	30	10	32	10	49	5.71	65	2.29	ETF1
High	IsMasterProtein	Q9NZL9	Methionine adenosyltransferase 2 subunit beta OS=Homo sapiens OX=9606 GN=MAT2B PE=1 SV=1	0	41.431	32	8	20	8	37.5	7.36	33.61	2.288	MAT2B
High	IsMasterProtein	P04439	HLA class I histocompatibility antigen, A alpha chain OS=Homo sapiens OX=9606 GN=HLA-A PE=1 SV=2	0	26.545	16	4	9	2	40.8	6	29.51	2.287	HLA-A
High	IsMasterProtein	Q8IYD1	Eukaryotic peptide chain release factor GTP-binding subunit ERF3B OS=Homo sapiens OX=9606 GN=GSPT2 PE=1 SV=2	0	42.363	17	9	31	1	68.8	5.43	69.94	2.264	GSPT2
High	IsMasterProtein	Q10713	Mitochondrial-processing peptidase subunit alpha OS=Homo sapiens OX=9606 GN=PMPCA PE=1 SV=2	0	23.378	7	3	10	3	58.2	6.92	9.18	2.247	PMPCA
High	IsMasterProtein	Q9HB07	UPF0160 protein MYG1, mitochondrial OS=Homo sapiens OX=9606 GN=C12orf10 PE=1 SV=2	0	10.516	6	2	4	2	42.4	6.67	11.72	2.219	C12orf10
High	IsMasterProtein	O00629	Importin subunit alpha-3 OS=Homo sapiens OX=9606 GN=KPNA4 PE=1 SV=1	0	21.076	9	3	10	2	57.9	4.96	13.32	2.217	KPNA4
High	IsMasterProtein	Q15370	Elongin-B OS=Homo sapiens OX=9606 GN=ELOB PE=1 SV=1	0	6.224	28	2	4	2	13.1	4.88	1.63	2.203	TCEB2; ELOB
High	IsMasterProtein	P61923	Coatomer subunit zeta-1 OS=Homo sapiens OX=9606 GN=COPZ1 PE=1 SV=1	0	12.777	21	2	12	2	20.2	4.81	15.93	2.201	COPZ1
High	IsMasterProtein	Q9P2E9	Ribosome-binding protein 1 OS=Homo sapiens OX=9606 GN=RRBP1 PE=1 SV=5	0	76.187	15	14	30	14	152.4	8.6	74.63	2.194
High	IsMasterProtein	Q9BQ52	Zinc phosphodiesterase ELAC protein 2 OS=Homo sapiens OX=9606 GN=ELAC2 PE=1 SV=2	0	36.363	16	7	13	7	92.2	7.9	28.83	2.187	ELAC2
High	IsMasterProtein	Q96CN7	Isochorismatase domain-containing protein 1 OS=Homo sapiens OX=9606 GN=ISOC1 PE=1 SV=3	0	23.601	24	5	10	5	32.2	7.39	11.19	2.18	ISOC1
High	IsMasterProtein	O43488	Aflatoxin B1 aldehyde reductase member 2 OS=Homo sapiens OX=9606 GN=AKR7A2 PE=1 SV=3	0	31.252	16	4	17	4	39.6	7.17	34.08	2.173	AKR7A2
High	IsMasterProtein	P05556	Integrin beta-1 OS=Homo sapiens OX=9606 GN=ITGB1 PE=1 SV=2	0	14.983	6	3	6	3	88.4	5.39	12.65	2.168	ITGB1
High	IsMasterProtein	Q9HAN9	Nicotinamide/nicotinic acid mononucleotide adenylyltransferase 1 OS=Homo sapiens OX=9606 GN=NMNAT1 PE=1 SV=1	0	9.532	8	2	9	2	31.9	8.87	15.7	2.139	NMNAT1
High	IsMasterProtein	P21266	Glutathione S-transferase Mu 3 OS=Homo sapiens OX=9606 GN=GSTM3 PE=1 SV=3	0	67.949	58	11	51	11	26.5	5.54	81.99	2.138	GSTM3
High	IsMasterProtein	Q9H0D6	5'-3' exoribonuclease 2 OS=Homo sapiens OX=9606 GN=XRN2 PE=1 SV=1	0	17.774	7	4	8	4	108.5	7.47	6.63	2.138	XRN2
High	IsMasterProtein	Q04446	1,4-alpha-glucan-branching enzyme OS=Homo sapiens OX=9606 GN=GBE1 PE=1 SV=3	0	44.987	15	7	14	7	80.4	6.32	41.39	2.129	GBE1
High	IsMasterProtein	Q8IZ73	RNA pseudouridylate synthase domain-containing protein 2 OS=Homo sapiens OX=9606 GN=RPUSD2 PE=1 SV=2	0	26.443	15	4	5	4	61.3	7.17	8.92	2.127	RPUSD2
High	IsMasterProtein	P29218	Inositol monophosphatase 1 OS=Homo sapiens OX=9606 GN=IMPA1 PE=1 SV=1	0	13.377	12	4	13	4	30.2	5.26	22.12	2.123	IMPA1
High	IsMasterProtein	Q99832	T-complex protein 1 subunit eta OS=Homo sapiens OX=9606 GN=CCT7 PE=1 SV=2	0	221	59	26	153	26	59.3	7.65	379.18	2.122	CCT7
High	IsMasterProtein	Q8NFC6	Biorientation of chromosomes in cell division protein 1-like 1 OS=Homo sapiens OX=9606 GN=BOD1L1 PE=1 SV=2	0	11.317	1	2	6	2	330.3	5.08	16.21	2.119	BOD1L1
High	IsMasterProtein	Q15054	DNA polymerase delta subunit 3 OS=Homo sapiens OX=9606 GN=POLD3 PE=1 SV=2	0	13.992	6	2	12	2	51.4	9.35	25.13	2.113	POLD3
High	IsMasterProtein	Q92945	Far upstream element-binding protein 2 OS=Homo sapiens OX=9606 GN=KHSRP PE=1 SV=4	0	11.186	4	2	4	2	73.1	7.3	11.72	2.1	KHSRP
High	IsMasterProtein	Q16576	Histone-binding protein RBBP7 OS=Homo sapiens OX=9606 GN=RBBP7 PE=1 SV=1	0	106.613	43	12	53	7	47.8	5.05	136.72	2.096	RBBP7
High	IsMasterProtein	Q6P158	Putative ATP-dependent RNA helicase DHX57 OS=Homo sapiens OX=9606 GN=DHX57 PE=1 SV=2	0	12.337	3	3	6	2	155.5	7.71	15.74	2.094	DHX57
High	IsMasterProtein	P55036	26S proteasome non-ATPase regulatory subunit 4 OS=Homo sapiens OX=9606 GN=PSMD4 PE=1 SV=1	0	29.534	23	5	14	5	40.7	4.79	35	2.09	PSMD4
High	IsMasterProtein	P62888	60S ribosomal protein L30 OS=Homo sapiens OX=9606 GN=RPL30 PE=1 SV=2	0	120.69	72	9	112	8	12.8	9.63	375.59	2.076	RPL30
High	IsMasterProtein	P61289	Proteasome activator complex subunit 3 OS=Homo sapiens OX=9606 GN=PSME3 PE=1 SV=1	0	75.701	35	9	72	9	29.5	5.95	173.04	2.073	PSME3
High	IsMasterProtein	Q9NX24	H/ACA ribonucleoprotein complex subunit 2 OS=Homo sapiens OX=9606 GN=NHP2 PE=1 SV=1	0	15.583	25	2	4	2	17.2	8.22	13.49	2.067	NHP2
High	IsMasterProtein	Q13547	Histone deacetylase 1 OS=Homo sapiens OX=9606 GN=HDAC1 PE=1 SV=1	0	28.895	20	6	18	3	55.1	5.48	43.21	2.066	HDAC1
High	IsMasterProtein	Q14151	Scaffold attachment factor B2 OS=Homo sapiens OX=9606 GN=SAFB2 PE=1 SV=1	0	112.464	18	15	63	6	107.4	6.16	176.2	2.063	SAFB2
High	IsMasterProtein	Q9NWH9	SAFB-like transcription modulator OS=Homo sapiens OX=9606 GN=SLTM PE=1 SV=2	0	74.285	13	11	34	11	117.1	7.87	104.77	2.053	SLTM
High	IsMasterProtein	Q16555	Dihydropyrimidinase-related protein 2 OS=Homo sapiens OX=9606 GN=DPYSL2 PE=1 SV=1	0	74.308	28	10	31	10	62.3	6.38	81.57	2.038	DPYSL2
High	IsMasterProtein	Q8IX12	Cell division cycle and apoptosis regulator protein 1 OS=Homo sapiens OX=9606 GN=CCAR1 PE=1 SV=2	0	69.335	16	14	44	14	132.7	5.76	92.85	2.026	CCAR1
High	IsMasterProtein	Q71UM5	40S ribosomal protein S27-like OS=Homo sapiens OX=9606 GN=RPS27L PE=1 SV=3	0	24.544	40	4	35	2	9.5	9.45	83.05	2.021	RPS27L
High	IsMasterProtein	P30050	60S ribosomal protein L12 OS=Homo sapiens OX=9606 GN=RPL12 PE=1 SV=1	0	96.276	73	10	102	10	17.8	9.42	306.8	2.013	RPL12
High	IsMasterProtein	P17655	Calpain-2 catalytic subunit OS=Homo sapiens OX=9606 GN=CAPN2 PE=1 SV=6	0	210.516	45	23	85	23	79.9	4.98	225.88	1.996	CAPN2
High	IsMasterProtein	P13674	Prolyl 4-hydroxylase subunit alpha-1 OS=Homo sapiens OX=9606 GN=P4HA1 PE=1 SV=2	0	18.189	9	3	6	3	61	6.01	13.61	1.99	P4HA1
High	IsMasterProtein	P83881	60S ribosomal protein L36a OS=Homo sapiens OX=9606 GN=RPL36A PE=1 SV=2	0	48.988	33	9	40	9	12.4	10.58	113.58	1.986	RPL36A
High	IsMasterProtein	Q96PZ0	Pseudouridylate synthase 7 homolog OS=Homo sapiens OX=9606 GN=PUS7 PE=1 SV=2	0	61.718	21	9	25	9	75	6.37	54.72	1.981	PUS7
High	IsMasterProtein	Q9Y265	RuvB-like 1 OS=Homo sapiens OX=9606 GN=RUVBL1 PE=1 SV=1	0	151.088	58	17	96	17	50.2	6.42	251.19	1.978	RUVBL1
High	IsMasterProtein	P43034	Platelet-activating factor acetylhydrolase IB subunit alpha OS=Homo sapiens OX=9606 GN=PAFAH1B1 PE=1 SV=2	0	32.278	15	5	13	4	46.6	7.37	28.64	1.96	PAFAH1B1
High	IsMasterProtein	P49354	Protein farnesyltransferase/geranylgeranyltransferase type-1 subunit alpha OS=Homo sapiens OX=9606 GN=FNTA PE=1 SV=1	0	37.952	16	4	19	4	44.4	5.08	45.2	1.953	FNTA
High	IsMasterProtein	P55809	Succinyl-CoA:3-ketoacid coenzyme A transferase 1, mitochondrial OS=Homo sapiens OX=9606 GN=OXCT1 PE=1 SV=1	0	38.566	22	7	16	7	56.1	7.46	27.47	1.953	OXCT1
High	IsMasterProtein	Q9GZR7	ATP-dependent RNA helicase DDX24 OS=Homo sapiens OX=9606 GN=DDX24 PE=1 SV=1	0	21.366	8	5	11	5	96.3	9.06	20.02	1.953	DDX24
High	IsMasterProtein	Q05519	Serine/arginine-rich splicing factor 11 OS=Homo sapiens OX=9606 GN=SRSF11 PE=1 SV=1	0	75.808	22	8	82	8	53.5	10.52	191.37	1.937	SRSF11
High	IsMasterProtein	Q6YHK3	CD109 antigen OS=Homo sapiens OX=9606 GN=CD109 PE=1 SV=2	0	6.831	2	2	4	2	161.6	5.85	3.38	1.934	CD109
High	IsMasterProtein	P48739	Phosphatidylinositol transfer protein beta isoform OS=Homo sapiens OX=9606 GN=PITPNB PE=1 SV=2	0.002	3.129	8	2	2	1	31.5	6.87	1.65	1.932	PITPNB
High	IsMasterProtein	Q9NX58	Cell growth-regulating nucleolar protein OS=Homo sapiens OX=9606 GN=LYAR PE=1 SV=2	0	156.602	45	14	78	14	43.6	9.54	228.98	1.93	LYAR
High	IsMasterProtein	O43447	Peptidyl-prolyl cis-trans isomerase H OS=Homo sapiens OX=9606 GN=PPIH PE=1 SV=1	0	6.256	12	3	12	1	19.2	8.07	15.88	1.92	PPIH
High	IsMasterProtein	Q7Z4V5	Hepatoma-derived growth factor-related protein 2 OS=Homo sapiens OX=9606 GN=HDGFL2 PE=1 SV=1	0	54.587	17	9	28	9	74.3	7.49	78.31	1.915	HDGFRP2; HDGFL2
High	IsMasterProtein	Q9BZI7	Regulator of nonsense transcripts 3B OS=Homo sapiens OX=9606 GN=UPF3B PE=1 SV=1	0	56.911	25	10	41	10	57.7	9.48	96.22	1.908	UPF3B
High	IsMasterProtein	Q12931	Heat shock protein 75 kDa, mitochondrial OS=Homo sapiens OX=9606 GN=TRAP1 PE=1 SV=3	0	139.181	33	15	62	14	80.1	8.21	188.83	1.907	TRAP1
High	IsMasterProtein	Q8TAE8	Growth arrest and DNA damage-inducible proteins-interacting protein 1 OS=Homo sapiens OX=9606 GN=GADD45GIP1 PE=1 SV=1	0	17.134	21	4	8	4	25.4	10.02	8.15	1.907	GADD45GIP1
High	IsMasterProtein	Q13428	Treacle protein OS=Homo sapiens OX=9606 GN=TCOF1 PE=1 SV=3	0	259.181	33	33	134	33	152	9.04	378.96	1.905	TCOF1
High	IsMasterProtein	P25398	40S ribosomal protein S12 OS=Homo sapiens OX=9606 GN=RPS12 PE=1 SV=3	0	51.193	54	6	37	6	14.5	7.21	82.1	1.898	RPS12
High	IsMasterProtein	O76071	Probable cytosolic iron-sulfur protein assembly protein CIAO1 OS=Homo sapiens OX=9606 GN=CIAO1 PE=1 SV=1	0	26.395	23	5	8	5	37.8	4.97	21.07	1.882	CIAO1
High	IsMasterProtein	O60610	Protein diaphanous homolog 1 OS=Homo sapiens OX=9606 GN=DIAPH1 PE=1 SV=2	0	130.133	20	21	65	21	141.3	5.41	128.46	1.875	DIAPH1
High	IsMasterProtein	O15067	Phosphoribosylformylglycinamidine synthase OS=Homo sapiens OX=9606 GN=PFAS PE=1 SV=4	0	181.06	28	23	78	23	144.6	5.76	232.58	1.87	PFAS
High	IsMasterProtein	P51991	Heterogeneous nuclear ribonucleoprotein A3 OS=Homo sapiens OX=9606 GN=HNRNPA3 PE=1 SV=2	0	78.778	27	9	33	7	39.6	9.01	83.98	1.87	HNRNPA3
High	IsMasterProtein	P62899	60S ribosomal protein L31 OS=Homo sapiens OX=9606 GN=RPL31 PE=1 SV=1	0	92.027	46	9	151	9	14.5	10.54	358.29	1.854	RPL31
High	IsMasterProtein	P23381	Tryptophan--tRNA ligase, cytoplasmic OS=Homo sapiens OX=9606 GN=WARS PE=1 SV=2	0	130.143	56	18	86	18	53.1	6.23	220.85	1.849	WARS
High	IsMasterProtein	Q5R3I4	Tetratricopeptide repeat protein 38 OS=Homo sapiens OX=9606 GN=TTC38 PE=1 SV=1	0	8	5	2	4	2	52.8	5.99	8.11	1.843	TTC38
High	IsMasterProtein	Q92576	PHD finger protein 3 OS=Homo sapiens OX=9606 GN=PHF3 PE=1 SV=3	0	7.239	1	2	4	2	229.3	6.96	8.15	1.841	PHF3
High	IsMasterProtein	Q8IYB3	Serine/arginine repetitive matrix protein 1 OS=Homo sapiens OX=9606 GN=SRRM1 PE=1 SV=2	0	201.738	28	21	123	21	102.3	11.84	486.87	1.837	SRRM1
High	IsMasterProtein	Q96SB4	SRSF protein kinase 1 OS=Homo sapiens OX=9606 GN=SRPK1 PE=1 SV=2	0	74.225	21	9	42	8	74.3	6.16	115.74	1.831	SRPK1
High	IsMasterProtein	P35609	Alpha-actinin-2 OS=Homo sapiens OX=9606 GN=ACTN2 PE=1 SV=1	0	61.751	12	9	33	2	103.8	5.45	94.94	1.815	ACTN2
High	IsMasterProtein	O00429	Dynamin-1-like protein OS=Homo sapiens OX=9606 GN=DNM1L PE=1 SV=2	0	114.664	34	15	39	15	81.8	6.81	82.79	1.802	DNM1L
High	IsMasterProtein	Q96KB5	Lymphokine-activated killer T-cell-originated protein kinase OS=Homo sapiens OX=9606 GN=PBK PE=1 SV=3	0	41.649	30	6	21	6	36.1	5.12	50.1	1.799	PBK
High	IsMasterProtein	Q14247	Src substrate cortactin OS=Homo sapiens OX=9606 GN=CTTN PE=1 SV=2	0	67.498	27	10	31	10	61.5	5.4	72.65	1.797	CTTN
High	IsMasterProtein	P04075	Fructose-bisphosphate aldolase A OS=Homo sapiens OX=9606 GN=ALDOA PE=1 SV=2	0	406.112	76	29	394	28	39.4	8.09	1244.76	1.796	ALDOA
High	IsMasterProtein	P08195	4F2 cell-surface antigen heavy chain OS=Homo sapiens OX=9606 GN=SLC3A2 PE=1 SV=3	0	156.695	38	17	71	17	68	5.01	178.09	1.788	SLC3A2
High	IsMasterProtein	P62826	GTP-binding nuclear protein Ran OS=Homo sapiens OX=9606 GN=RAN PE=1 SV=3	0	173.752	48	15	150	15	24.4	7.49	465.57	1.772	RAN
High	IsMasterProtein	Q5TBB1	Ribonuclease H2 subunit B OS=Homo sapiens OX=9606 GN=RNASEH2B PE=1 SV=1	0	29.127	24	5	15	5	35.1	9.13	35.97	1.772	RNASEH2B
High	IsMasterProtein	Q9HCE1	Helicase MOV-10 OS=Homo sapiens OX=9606 GN=MOV10 PE=1 SV=2	0	11.351	2	2	4	2	113.6	8.82	8.09	1.769	MOV10
High	IsMasterProtein	Q93096	Protein tyrosine phosphatase type IVA 1 OS=Homo sapiens OX=9606 GN=PTP4A1 PE=1 SV=2	0	37.376	31	4	16	4	19.8	8.97	32.25	1.763	PTP4A1
High	IsMasterProtein	O60506	Heterogeneous nuclear ribonucleoprotein Q OS=Homo sapiens OX=9606 GN=SYNCRIP PE=1 SV=2	0	257.937	42	27	174	20	69.6	8.59	425.89	1.762	SYNCRIP
High	IsMasterProtein	Q9BRT6	Protein LLP homolog OS=Homo sapiens OX=9606 GN=LLPH PE=1 SV=1	0	33.93	29	3	29	3	15.2	10.37	78.14	1.761	LLPH
High	IsMasterProtein	P17987	T-complex protein 1 subunit alpha OS=Homo sapiens OX=9606 GN=TCP1 PE=1 SV=1	0	263.556	62	27	188	27	60.3	6.11	518.83	1.754	TCP1
High	IsMasterProtein	P13010	X-ray repair cross-complementing protein 5 OS=Homo sapiens OX=9606 GN=XRCC5 PE=1 SV=3	0	206.741	44	23	140	23	82.7	5.81	357.13	1.754	XRCC5
High	IsMasterProtein	P04406	Glyceraldehyde-3-phosphate dehydrogenase OS=Homo sapiens OX=9606 GN=GAPDH PE=1 SV=3	0	489.102	81	23	1200	23	36	8.46	2140.57	1.751	GAPDH
High	IsMasterProtein	Q9NZL4	Hsp70-binding protein 1 OS=Homo sapiens OX=9606 GN=HSPBP1 PE=1 SV=2	0	40.182	29	7	16	7	39.3	5.21	28.95	1.74
High	IsMasterProtein	P23528	Cofilin-1 OS=Homo sapiens OX=9606 GN=CFL1 PE=1 SV=3	0	187.859	77	17	149	12	18.5	8.09	479.06	1.736	CFL1
High	IsMasterProtein	O43264	Centromere/kinetochore protein zw10 homolog OS=Homo sapiens OX=9606 GN=ZW10 PE=1 SV=3	0	13.569	6	3	6	3	88.8	6.27	4.23	1.736	ZW10
High	IsMasterProtein	Q7Z6Z7	E3 ubiquitin-protein ligase HUWE1 OS=Homo sapiens OX=9606 GN=HUWE1 PE=1 SV=3	0	392.265	21	56	175	56	481.6	5.22	410.52	1.733	HUWE1
High	IsMasterProtein	Q13427	Peptidyl-prolyl cis-trans isomerase G OS=Homo sapiens OX=9606 GN=PPIG PE=1 SV=2	0	39.276	10	6	14	6	88.6	10.29	36.51	1.733	PPIG
High	IsMasterProtein	Q9Y570	Protein phosphatase methylesterase 1 OS=Homo sapiens OX=9606 GN=PPME1 PE=1 SV=3	0	24.656	23	5	11	5	42.3	5.97	14.29	1.732	PPME1
High	IsMasterProtein	P10321	HLA class I histocompatibility antigen, C alpha chain OS=Homo sapiens OX=9606 GN=HLA-C PE=1 SV=3	0	25.064	14	3	7	2	40.6	6.04	25.52	1.731	HLA-C
High	IsMasterProtein	Q9Y3F4	Serine-threonine kinase receptor-associated protein OS=Homo sapiens OX=9606 GN=STRAP PE=1 SV=1	0	78.585	57	13	50	13	38.4	5.12	115.28	1.72	STRAP
High	IsMasterProtein	P18583	Protein SON OS=Homo sapiens OX=9606 GN=SON PE=1 SV=4	0	108.202	12	15	59	15	263.7	5.64	187.99	1.713	SON
High	IsMasterProtein	P05388	60S acidic ribosomal protein P0 OS=Homo sapiens OX=9606 GN=RPLP0 PE=1 SV=1	0	164.351	57	17	133	17	34.3	5.97	397.3	1.709	RPLP0
High	IsMasterProtein	Q9NQ55	Suppressor of SWI4 1 homolog OS=Homo sapiens OX=9606 GN=PPAN PE=2 SV=1	0	62.41	22	7	25	7	53.2	10.13	78.03	1.706	PPAN; PPAN-P2RY11
High	IsMasterProtein	P13639	Elongation factor 2 OS=Homo sapiens OX=9606 GN=EEF2 PE=1 SV=4	0	639.139	65	56	723	55	95.3	6.83	1884.73	1.701	EEF2
High	IsMasterProtein	P47914	60S ribosomal protein L29 OS=Homo sapiens OX=9606 GN=RPL29 PE=1 SV=2	0	33.837	23	4	48	4	17.7	11.66	159.65	1.69	RPL29
High	IsMasterProtein	Q15393	Splicing factor 3B subunit 3 OS=Homo sapiens OX=9606 GN=SF3B3 PE=1 SV=4	0	181.314	30	28	116	28	135.5	5.26	279.42	1.685	SF3B3
High	IsMasterProtein	P21399	Cytoplasmic aconitate hydratase OS=Homo sapiens OX=9606 GN=ACO1 PE=1 SV=3	0	51.464	16	9	30	9	98.3	6.68	58.66	1.681	ACO1
High	IsMasterProtein	P22234	Multifunctional protein ADE2 OS=Homo sapiens OX=9606 GN=PAICS PE=1 SV=3	0	147.028	64	20	119	20	47	7.23	264.21	1.675	PAICS
High	IsMasterProtein	P14625	Endoplasmin OS=Homo sapiens OX=9606 GN=HSP90B1 PE=1 SV=1	0	378.545	47	42	323	40	92.4	4.84	852.72	1.672	HSP90B1
High	IsMasterProtein	P09960	Leukotriene A-4 hydrolase OS=Homo sapiens OX=9606 GN=LTA4H PE=1 SV=2	0	103.272	35	19	62	19	69.2	6.18	132.59	1.672	LTA4H
High	IsMasterProtein	P08238	Heat shock protein HSP 90-beta OS=Homo sapiens OX=9606 GN=HSP90AB1 PE=1 SV=4	0	726.325	70	61	1018	31	83.2	5.03	2686.8	1.666	HSP90AB1
High	IsMasterProtein	Q9NY33	Dipeptidyl peptidase 3 OS=Homo sapiens OX=9606 GN=DPP3 PE=1 SV=2	0	120.673	28	14	48	14	82.5	5.1	129.15	1.663	DPP3
High	IsMasterProtein	Q9NV56	MRG/MORF4L-binding protein OS=Homo sapiens OX=9606 GN=MRGBP PE=1 SV=1	0	7.854	11	2	7	2	22.4	5.83	4.7	1.66	MRGBP
High	IsMasterProtein	P00558	Phosphoglycerate kinase 1 OS=Homo sapiens OX=9606 GN=PGK1 PE=1 SV=3	0	459.182	83	37	512	37	44.6	8.1	1479.73	1.657	PGK1
High	IsMasterProtein	P18206	Vinculin OS=Homo sapiens OX=9606 GN=VCL PE=1 SV=4	0	260.43	43	37	150	37	123.7	5.66	373.93	1.656	VCL
High	IsMasterProtein	Q9Y3C8	Ubiquitin-fold modifier-conjugating enzyme 1 OS=Homo sapiens OX=9606 GN=UFC1 PE=1 SV=3	0	7.771	13	2	12	2	19.4	7.4	9.98	1.655	UFC1
High	IsMasterProtein	P61077	Ubiquitin-conjugating enzyme E2 D3 OS=Homo sapiens OX=9606 GN=UBE2D3 PE=1 SV=1	0	31.418	36	3	14	3	16.7	7.8	38.37	1.652	UBE2D3
High	IsMasterProtein	P11142	Heat shock cognate 71 kDa protein OS=Homo sapiens OX=9606 GN=HSPA8 PE=1 SV=1	0	249.83	47	28	234	23	70.9	5.52	652.03	1.651	HSPA8
High	IsMasterProtein	P62140	Serine/threonine-protein phosphatase PP1-beta catalytic subunit OS=Homo sapiens OX=9606 GN=PPP1CB PE=1 SV=3	0	148.652	63	15	76	4	37.2	6.19	206.08	1.641	PPP1CB
High	IsMasterProtein	Q08945	FACT complex subunit SSRP1 OS=Homo sapiens OX=9606 GN=SSRP1 PE=1 SV=1	0	32.74	10	5	11	5	81	6.87	25.61	1.635	SSRP1
High	IsMasterProtein	Q9UBQ5	Eukaryotic translation initiation factor 3 subunit K OS=Homo sapiens OX=9606 GN=EIF3K PE=1 SV=1	0	18.899	22	3	15	3	25	4.93	36.61	1.628	EIF3K
High	IsMasterProtein	P61026	Ras-related protein Rab-10 OS=Homo sapiens OX=9606 GN=RAB10 PE=1 SV=1	0	18.183	21	4	10	2	22.5	8.38	25.58	1.627	RAB10
High	IsMasterProtein	P07900	Heat shock protein HSP 90-alpha OS=Homo sapiens OX=9606 GN=HSP90AA1 PE=1 SV=5	0	694.171	66	57	928	36	84.6	5.02	2456.84	1.626	HSP90AA1
High	IsMasterProtein	P46777	60S ribosomal protein L5 OS=Homo sapiens OX=9606 GN=RPL5 PE=1 SV=3	0	249.004	53	22	497	22	34.3	9.72	1085.25	1.621	RPL5
High	IsMasterProtein	Q96GQ7	Probable ATP-dependent RNA helicase DDX27 OS=Homo sapiens OX=9606 GN=DDX27 PE=1 SV=2	0	69.271	17	11	43	11	89.8	9.28	91.64	1.62	DDX27
High	IsMasterProtein	O75683	Surfeit locus protein 6 OS=Homo sapiens OX=9606 GN=SURF6 PE=1 SV=3	0	107.177	42	13	72	13	41.4	10.64	198.88	1.618	SURF6
High	IsMasterProtein	P37837	Transaldolase OS=Homo sapiens OX=9606 GN=TALDO1 PE=1 SV=2	0	50.892	31	10	49	10	37.5	6.81	114.19	1.618	TALDO1
High	IsMasterProtein	P46781	40S ribosomal protein S9 OS=Homo sapiens OX=9606 GN=RPS9 PE=1 SV=3	0	100.839	63	21	187	21	22.6	10.65	402.04	1.617	RPS9
High	IsMasterProtein	Q9P0V9	Septin-10 OS=Homo sapiens OX=9606 GN=SEPTIN10 PE=1 SV=2	0	16.299	10	3	7	3	52.6	6.8	16.93	1.616	2020-09-10
High	IsMasterProtein	Q99460	26S proteasome non-ATPase regulatory subunit 1 OS=Homo sapiens OX=9606 GN=PSMD1 PE=1 SV=2	0	132.512	29	18	67	18	105.8	5.39	151.42	1.606	PSMD1
High	IsMasterProtein	P68400	Casein kinase II subunit alpha OS=Homo sapiens OX=9606 GN=CSNK2A1 PE=1 SV=1	0	176.024	52	14	103	14	45.1	7.74	312.73	1.603	CSNK2A1
High	IsMasterProtein	Q14694	Ubiquitin carboxyl-terminal hydrolase 10 OS=Homo sapiens OX=9606 GN=USP10 PE=1 SV=2	0	23.665	7	4	7	4	87.1	5.31	24.76	1.602	USP10
High	IsMasterProtein	O95486	Protein transport protein Sec24A OS=Homo sapiens OX=9606 GN=SEC24A PE=1 SV=2	0	13.729	3	3	3	3	119.7	7.66	6.02	1.601	SEC24A
High	IsMasterProtein	Q86UP2	Kinectin OS=Homo sapiens OX=9606 GN=KTN1 PE=1 SV=1	0	38.447	9	7	16	7	156.2	5.64	37.45	1.6	KTN1
High	IsMasterProtein	Q9UKS6	Protein kinase C and casein kinase substrate in neurons protein 3 OS=Homo sapiens OX=9606 GN=PACSIN3 PE=1 SV=2	0	66.316	23	7	24	7	48.5	6.18	60.03	1.593	PACSIN3
High	IsMasterProtein	P52565	Rho GDP-dissociation inhibitor 1 OS=Homo sapiens OX=9606 GN=ARHGDIA PE=1 SV=3	0	78.315	33	7	55	7	23.2	5.11	127.89	1.592	ARHGDIA
High	IsMasterProtein	Q9Y4Z0	U6 snRNA-associated Sm-like protein LSm4 OS=Homo sapiens OX=9606 GN=LSM4 PE=1 SV=1	0	17.861	20	3	12	3	15.3	9.99	31.87	1.581	LSM4
High	IsMasterProtein	Q14739	Delta(14)-sterol reductase LBR OS=Homo sapiens OX=9606 GN=LBR PE=1 SV=2	0	30.799	10	6	20	6	70.7	9.36	37.88	1.569	LBR
High	IsMasterProtein	Q13126	S-methyl-5'-thioadenosine phosphorylase OS=Homo sapiens OX=9606 GN=MTAP PE=1 SV=2	0	55.248	45	8	28	8	31.2	7.18	79.06	1.561	MTAP
High	IsMasterProtein	P47813	Eukaryotic translation initiation factor 1A, X-chromosomal OS=Homo sapiens OX=9606 GN=EIF1AX PE=1 SV=2	0	69.05	69	10	67	10	16.5	5.24	147.09	1.541	EIF1AX; LOC101060318; LOC107984923
High	IsMasterProtein	Q9Y2W2	WW domain-binding protein 11 OS=Homo sapiens OX=9606 GN=WBP11 PE=1 SV=1	0	112.876	31	17	58	17	70	8.38	190.52	1.527	WBP11
High	IsMasterProtein	Q13451	Peptidyl-prolyl cis-trans isomerase FKBP5 OS=Homo sapiens OX=9606 GN=FKBP5 PE=1 SV=2	0	44.701	20	7	20	7	51.2	5.9	61.04	1.526	FKBP5
High	IsMasterProtein	O60832	H/ACA ribonucleoprotein complex subunit DKC1 OS=Homo sapiens OX=9606 GN=DKC1 PE=1 SV=3	0	114.604	40	15	61	15	57.6	9.42	130.91	1.514	DKC1
High	IsMasterProtein	Q13404	Ubiquitin-conjugating enzyme E2 variant 1 OS=Homo sapiens OX=9606 GN=UBE2V1 PE=1 SV=2	0	23.68	35	5	28	2	16.5	7.93	53.73	1.514	UBE2V1; TMEM189-UBE2V1
High	IsMasterProtein	P14550	Aldo-keto reductase family 1 member A1 OS=Homo sapiens OX=9606 GN=AKR1A1 PE=1 SV=3	0	30.304	24	6	19	6	36.6	6.79	25.75	1.505	AKR1A1
High	IsMasterProtein	P41091	Eukaryotic translation initiation factor 2 subunit 3 OS=Homo sapiens OX=9606 GN=EIF2S3 PE=1 SV=3	0	177.147	51	19	136	19	51.1	8.4	363.39	1.498	EIF2S3
High	IsMasterProtein	Q9BTE3	Mini-chromosome maintenance complex-binding protein OS=Homo sapiens OX=9606 GN=MCMBP PE=1 SV=2	0	11.898	5	2	6	2	72.9	5.87	16.22	1.498	MCMBP
High	IsMasterProtein	O75663	TIP41-like protein OS=Homo sapiens OX=9606 GN=TIPRL PE=1 SV=2	0	23.203	26	6	16	6	31.4	5.91	12.83	1.497	TIPRL
High	IsMasterProtein	O15144	Actin-related protein 2/3 complex subunit 2 OS=Homo sapiens OX=9606 GN=ARPC2 PE=1 SV=1	0	40.846	39	9	24	9	34.3	7.36	44.34	1.494	ARPC2
High	IsMasterProtein	Q02218	2-oxoglutarate dehydrogenase, mitochondrial OS=Homo sapiens OX=9606 GN=OGDH PE=1 SV=3	0	33.714	7	4	11	4	115.9	6.86	23.01	1.484	OGDH
High	IsMasterProtein	P05387	60S acidic ribosomal protein P2 OS=Homo sapiens OX=9606 GN=RPLP2 PE=1 SV=1	0	47.575	77	5	34	4	11.7	4.54	71.18	1.473	RPLP2
High	IsMasterProtein	P12270	Nucleoprotein TPR OS=Homo sapiens OX=9606 GN=TPR PE=1 SV=3	0	58.218	6	10	27	10	267.1	5.02	53.15	1.464	TPR
High	IsMasterProtein	P0DMV9	Heat shock 70 kDa protein 1B OS=Homo sapiens OX=9606 GN=HSPA1B PE=1 SV=1	0	206.112	48	24	154	20	70	5.66	435.3	1.463	HSPA1B; HSPA1A
High	IsMasterProtein	P09132	Signal recognition particle 19 kDa protein OS=Homo sapiens OX=9606 GN=SRP19 PE=1 SV=3	0	28.389	21	3	7	3	16.1	9.85	25.65	1.462	SRP19
High	IsMasterProtein	Q14CX7	N-alpha-acetyltransferase 25, NatB auxiliary subunit OS=Homo sapiens OX=9606 GN=NAA25 PE=1 SV=1	0	21.101	4	3	10	3	112.2	6.64	22.43	1.451	NAA25
High	IsMasterProtein	Q9NY12	H/ACA ribonucleoprotein complex subunit 1 OS=Homo sapiens OX=9606 GN=GAR1 PE=1 SV=1	0	8.882	19	4	10	4	22.3	10.92	13.54	1.446	GAR1
High	IsMasterProtein	Q9UNZ5	Leydig cell tumor 10 kDa protein homolog OS=Homo sapiens OX=9606 GN=C19orf53 PE=1 SV=1	0	8.081	17	3	10	3	10.6	11.55	32.07	1.441	C19orf53
High	IsMasterProtein	P37108	Signal recognition particle 14 kDa protein OS=Homo sapiens OX=9606 GN=SRP14 PE=1 SV=2	0	70.583	60	9	109	9	14.6	10.04	304.05	1.432	SRP14
High	IsMasterProtein	P31948	Stress-induced-phosphoprotein 1 OS=Homo sapiens OX=9606 GN=STIP1 PE=1 SV=1	0	19.633	9	4	10	4	62.6	6.8	16.13	1.43	STIP1
High	IsMasterProtein	P19388	DNA-directed RNA polymerases I, II, and III subunit RPABC1 OS=Homo sapiens OX=9606 GN=POLR2E PE=1 SV=4	0	15.202	15	2	5	2	24.5	5.95	18.64	1.426	POLR2E
High	IsMasterProtein	O76021	Ribosomal L1 domain-containing protein 1 OS=Homo sapiens OX=9606 GN=RSL1D1 PE=1 SV=3	0	323.186	60	34	244	34	54.9	10.13	624.34	1.419	RSL1D1
High	IsMasterProtein	P30043	Flavin reductase (NADPH) OS=Homo sapiens OX=9606 GN=BLVRB PE=1 SV=3	0	17.435	18	3	10	3	22.1	7.65	25.33	1.418	BLVRB
High	IsMasterProtein	O00743	Serine/threonine-protein phosphatase 6 catalytic subunit OS=Homo sapiens OX=9606 GN=PPP6C PE=1 SV=1	0	7.99	11	2	5	2	35.1	5.69	4.41	1.406	PPP6C
High	IsMasterProtein	P51149	Ras-related protein Rab-7a OS=Homo sapiens OX=9606 GN=RAB7A PE=1 SV=1	0	33.149	36	6	27	6	23.5	6.7	58.54	1.399	RAB7A
High	IsMasterProtein	Q9NXG2	THUMP domain-containing protein 1 OS=Homo sapiens OX=9606 GN=THUMPD1 PE=1 SV=2	0	46.661	34	7	18	7	39.3	7.88	31.71	1.397	THUMPD1
High	IsMasterProtein	O43390	Heterogeneous nuclear ribonucleoprotein R OS=Homo sapiens OX=9606 GN=HNRNPR PE=1 SV=1	0	255.756	44	27	236	20	70.9	8.13	601.59	1.394	HNRNPR
High	IsMasterProtein	Q07666	KH domain-containing, RNA-binding, signal transduction-associated protein 1 OS=Homo sapiens OX=9606 GN=KHDRBS1 PE=1 SV=1	0	77.417	28	10	63	10	48.2	8.66	149.71	1.394	KHDRBS1
High	IsMasterProtein	P11940	Polyadenylate-binding protein 1 OS=Homo sapiens OX=9606 GN=PABPC1 PE=1 SV=2	0	135.625	28	21	116	11	70.6	9.5	283.11	1.39	PABPC1
High	IsMasterProtein	P31947	14-3-3 protein sigma OS=Homo sapiens OX=9606 GN=SFN PE=1 SV=1	0	44.164	47	11	52	6	27.8	4.74	82.13	1.381	SFN
High	IsMasterProtein	P62873	Guanine nucleotide-binding protein G(I)/G(S)/G(T) subunit beta-1 OS=Homo sapiens OX=9606 GN=GNB1 PE=1 SV=3	0	40.727	19	5	20	1	37.4	6	54.87	1.38	GNB1
High	IsMasterProtein	P40926	Malate dehydrogenase, mitochondrial OS=Homo sapiens OX=9606 GN=MDH2 PE=1 SV=3	0	31.585	22	5	19	5	35.5	8.68	40.9	1.377	MDH2
High	IsMasterProtein	Q13620	Cullin-4B OS=Homo sapiens OX=9606 GN=CUL4B PE=1 SV=4	0	39.521	8	6	24	3	103.9	7.37	40.2	1.375	CUL4B
High	IsMasterProtein	Q9NYK5	39S ribosomal protein L39, mitochondrial OS=Homo sapiens OX=9606 GN=MRPL39 PE=1 SV=3	0	11.812	8	2	5	2	38.7	7.65	15.65	1.367	MRPL39
High	IsMasterProtein	P56545	C-terminal-binding protein 2 OS=Homo sapiens OX=9606 GN=CTBP2 PE=1 SV=1	0	21.392	11	3	5	3	48.9	6.95	17.5	1.367	CTBP2
High	IsMasterProtein	Q13492	Phosphatidylinositol-binding clathrin assembly protein OS=Homo sapiens OX=9606 GN=PICALM PE=1 SV=2	0	11.499	6	2	5	2	70.7	7.9	2.68	1.365	PICALM
High	IsMasterProtein	P43487	Ran-specific GTPase-activating protein OS=Homo sapiens OX=9606 GN=RANBP1 PE=1 SV=1	0	26.796	26	4	10	4	23.3	5.29	28.1	1.364	RANBP1
High	IsMasterProtein	P51116	Fragile X mental retardation syndrome-related protein 2 OS=Homo sapiens OX=9606 GN=FXR2 PE=1 SV=2	0	23.412	8	4	7	3	74.2	6.23	18.34	1.364	FXR2
High	IsMasterProtein	Q12905	Interleukin enhancer-binding factor 2 OS=Homo sapiens OX=9606 GN=ILF2 PE=1 SV=2	0	171.067	56	17	119	17	43	5.26	310.24	1.362	ILF2
High	IsMasterProtein	Q9Y281	Cofilin-2 OS=Homo sapiens OX=9606 GN=CFL2 PE=1 SV=1	0	82.925	60	10	82	5	18.7	7.88	219	1.361	CFL2
High	IsMasterProtein	Q14697	Neutral alpha-glucosidase AB OS=Homo sapiens OX=9606 GN=GANAB PE=1 SV=3	0	317.991	53	35	207	35	106.8	6.14	529.82	1.359	GANAB
High	IsMasterProtein	P46940	Ras GTPase-activating-like protein IQGAP1 OS=Homo sapiens OX=9606 GN=IQGAP1 PE=1 SV=1	0	601.81	54	77	434	77	189.1	6.48	1177.19	1.355	IQGAP1
High	IsMasterProtein	P42025	Beta-centractin OS=Homo sapiens OX=9606 GN=ACTR1B PE=1 SV=1	0	32.643	31	5	10	2	42.3	6.4	19.68	1.351	ACTR1B
High	IsMasterProtein	Q9NPE3	H/ACA ribonucleoprotein complex subunit 3 OS=Homo sapiens OX=9606 GN=NOP10 PE=1 SV=1	0	14.109	59	3	8	3	7.7	9.99	20.22	1.347	NOP10
High	IsMasterProtein	P32320	Cytidine deaminase OS=Homo sapiens OX=9606 GN=CDA PE=1 SV=2	0	14.511	18	2	3	2	16.2	6.92	8.51	1.346	CDA
High	IsMasterProtein	Q01650	Large neutral amino acids transporter small subunit 1 OS=Homo sapiens OX=9606 GN=SLC7A5 PE=1 SV=2	0	17.733	6	2	6	2	55	7.72	18.3	1.335	SLC7A5
High	IsMasterProtein	Q15019	Septin-2 OS=Homo sapiens OX=9606 GN=SEPTIN2 PE=1 SV=1	0	100.694	45	10	53	10	41.5	6.6	143.39	1.322	2020-09-02
High	IsMasterProtein	P67870	Casein kinase II subunit beta OS=Homo sapiens OX=9606 GN=CSNK2B PE=1 SV=1	0	31.886	41	6	20	6	24.9	5.55	48.68	1.322	CSNK2B
High	IsMasterProtein	P49711	Transcriptional repressor CTCF OS=Homo sapiens OX=9606 GN=CTCF PE=1 SV=1	0	39.282	11	5	19	5	82.7	6.96	40.68	1.309	CTCF
High	IsMasterProtein	Q8WVY7	Ubiquitin-like domain-containing CTD phosphatase 1 OS=Homo sapiens OX=9606 GN=UBLCP1 PE=1 SV=2	0	18.52	13	4	7	4	36.8	6.46	15.56	1.309	UBLCP1
High	IsMasterProtein	O00299	Chloride intracellular channel protein 1 OS=Homo sapiens OX=9606 GN=CLIC1 PE=1 SV=4	0	107.793	63	15	100	14	26.9	5.17	239.33	1.308	CLIC1
High	IsMasterProtein	P48729	Casein kinase I isoform alpha OS=Homo sapiens OX=9606 GN=CSNK1A1 PE=1 SV=2	0	29.029	23	7	23	7	38.9	9.57	39.92	1.306	CSNK1A1
High	IsMasterProtein	P34897	Serine hydroxymethyltransferase, mitochondrial OS=Homo sapiens OX=9606 GN=SHMT2 PE=1 SV=3	0	128.135	46	18	88	17	56	8.53	223.55	1.282	SHMT2
High	IsMasterProtein	Q5F1R6	DnaJ homolog subfamily C member 21 OS=Homo sapiens OX=9606 GN=DNAJC21 PE=1 SV=2	0	27.796	13	5	15	5	62	5.47	33	1.277	DNAJC21
High	IsMasterProtein	Q2NL82	Pre-rRNA-processing protein TSR1 homolog OS=Homo sapiens OX=9606 GN=TSR1 PE=1 SV=1	0	219.746	43	26	151	26	91.8	7.42	400.5	1.27	TSR1
High	IsMasterProtein	P35613	Basigin OS=Homo sapiens OX=9606 GN=BSG PE=1 SV=2	0	37.966	13	4	26	4	42.2	5.66	59.39	1.262	BSG
High	IsMasterProtein	Q12792	Twinfilin-1 OS=Homo sapiens OX=9606 GN=TWF1 PE=1 SV=3	0	70.568	33	9	29	8	40.3	6.96	89.12	1.26	TWF1
High	IsMasterProtein	Q9H6S3	Epidermal growth factor receptor kinase substrate 8-like protein 2 OS=Homo sapiens OX=9606 GN=EPS8L2 PE=1 SV=2	0	27.259	10	4	8	4	80.6	6.84	19.82	1.26	EPS8L2
High	IsMasterProtein	Q96P70	Importin-9 OS=Homo sapiens OX=9606 GN=IPO9 PE=1 SV=3	0	75.131	17	11	32	11	115.9	4.81	61.92	1.258	IPO9
High	IsMasterProtein	Q15435	Protein phosphatase 1 regulatory subunit 7 OS=Homo sapiens OX=9606 GN=PPP1R7 PE=1 SV=1	0	14.194	8	2	10	2	41.5	4.91	12.71	1.252	PPP1R7
High	IsMasterProtein	P23526	Adenosylhomocysteinase OS=Homo sapiens OX=9606 GN=AHCY PE=1 SV=4	0	179.147	48	21	196	19	47.7	6.34	522.59	1.243	AHCY
High	IsMasterProtein	P62244	40S ribosomal protein S15a OS=Homo sapiens OX=9606 GN=RPS15A PE=1 SV=2	0	78.337	65	10	86	10	14.8	10.13	190.59	1.243	RPS15A
High	IsMasterProtein	Q9UNH7	Sorting nexin-6 OS=Homo sapiens OX=9606 GN=SNX6 PE=1 SV=1	0	60.412	31	11	39	11	46.6	6.16	79.11	1.24	SNX6
High	IsMasterProtein	Q5TFE4	5'-nucleotidase domain-containing protein 1 OS=Homo sapiens OX=9606 GN=NT5DC1 PE=1 SV=1	0	38.882	23	7	21	7	51.8	6.35	38.05	1.237	NT5DC1
High	IsMasterProtein	P49770	Translation initiation factor eIF-2B subunit beta OS=Homo sapiens OX=9606 GN=EIF2B2 PE=1 SV=3	0	15.88	14	4	11	4	39	6.16	15.6	1.235	EIF2B2
High	IsMasterProtein	P11021	Endoplasmic reticulum chaperone BiP OS=Homo sapiens OX=9606 GN=HSPA5 PE=1 SV=2	0	192.37	44	23	122	20	72.3	5.16	336.78	1.227	HSPA5
High	IsMasterProtein	Q96DG6	Carboxymethylenebutenolidase homolog OS=Homo sapiens OX=9606 GN=CMBL PE=1 SV=1	0	43.524	25	7	33	7	28	7.18	90.47	1.214	CMBL
High	IsMasterProtein	Q9UBQ0	Vacuolar protein sorting-associated protein 29 OS=Homo sapiens OX=9606 GN=VPS29 PE=1 SV=1	0	12.843	13	2	9	2	20.5	6.79	16.58	1.213	VPS29
High	IsMasterProtein	P07954	Fumarate hydratase, mitochondrial OS=Homo sapiens OX=9606 GN=FH PE=1 SV=3	0	52.012	21	6	22	6	54.6	8.76	53.51	1.196	FH
High	IsMasterProtein	Q5T3I0	G patch domain-containing protein 4 OS=Homo sapiens OX=9606 GN=GPATCH4 PE=1 SV=2	0	24.512	10	4	13	4	50.4	9.63	41.46	1.195	GPATCH4
High	IsMasterProtein	Q9NWB6	Arginine and glutamate-rich protein 1 OS=Homo sapiens OX=9606 GN=ARGLU1 PE=1 SV=1	0	11.771	14	5	20	5	33.2	10.35	32.48	1.194	ARGLU1
High	IsMasterProtein	O43847	Nardilysin OS=Homo sapiens OX=9606 GN=NRDC PE=1 SV=3	0	49.707	8	8	25	8	131.6	4.98	51.37	1.188
High	IsMasterProtein	Q86UE4	Protein LYRIC OS=Homo sapiens OX=9606 GN=MTDH PE=1 SV=2	0	21.979	13	4	15	4	63.8	9.32	26.47	1.187	MTDH
High	IsMasterProtein	P50238	Cysteine-rich protein 1 OS=Homo sapiens OX=9606 GN=CRIP1 PE=1 SV=3	0	25.921	56	3	11	3	8.5	8.75	30.64	1.185	CRIP1
High	IsMasterProtein	O43491	Band 4.1-like protein 2 OS=Homo sapiens OX=9606 GN=EPB41L2 PE=1 SV=1	0	5.034	2	2	4	2	112.5	5.44	0	1.183	EPB41L2
High	IsMasterProtein	P47756	F-actin-capping protein subunit beta OS=Homo sapiens OX=9606 GN=CAPZB PE=1 SV=4	0	8.079	11	3	6	3	31.3	5.59	10.81	1.182	CAPZB
High	IsMasterProtein	P29692	Elongation factor 1-delta OS=Homo sapiens OX=9606 GN=EEF1D PE=1 SV=5	0	32.449	18	3	16	3	31.1	5.01	54.14	1.175	EEF1D
High	IsMasterProtein	Q3KQU3	MAP7 domain-containing protein 1 OS=Homo sapiens OX=9606 GN=MAP7D1 PE=1 SV=1	0	15.567	3	2	4	2	92.8	10.11	12.84	1.175	MAP7D1
High	IsMasterProtein	Q9Y3B9	RRP15-like protein OS=Homo sapiens OX=9606 GN=RRP15 PE=1 SV=2	0	18.146	15	5	13	5	31.5	5.52	14.61	1.173	RRP15
High	IsMasterProtein	P63208	S-phase kinase-associated protein 1 OS=Homo sapiens OX=9606 GN=SKP1 PE=1 SV=2	0	6.575	13	2	2	2	18.6	4.54	4.77	1.17	SKP1
High	IsMasterProtein	Q9BZE1	39S ribosomal protein L37, mitochondrial OS=Homo sapiens OX=9606 GN=MRPL37 PE=1 SV=2	0	14.627	7	2	4	2	48.1	8.59	10.56	1.163	MRPL37
High	IsMasterProtein	Q6IBS0	Twinfilin-2 OS=Homo sapiens OX=9606 GN=TWF2 PE=1 SV=2	0	16.826	12	3	6	2	39.5	6.84	20.28	1.162	TWF2
High	IsMasterProtein	Q15691	Microtubule-associated protein RP/EB family member 1 OS=Homo sapiens OX=9606 GN=MAPRE1 PE=1 SV=3	0	35.59	29	5	18	5	30	5.14	65.31	1.16	MAPRE1
High	IsMasterProtein	P46783	40S ribosomal protein S10 OS=Homo sapiens OX=9606 GN=RPS10 PE=1 SV=1	0	143.979	74	17	224	16	18.9	10.15	541.81	1.158	RPS10
High	IsMasterProtein	P18858	DNA ligase 1 OS=Homo sapiens OX=9606 GN=LIG1 PE=1 SV=1	0	52.012	12	7	23	7	101.7	5.62	50.78	1.157	LIG1
High	IsMasterProtein	Q3YEC7	Rab-like protein 6 OS=Homo sapiens OX=9606 GN=RABL6 PE=1 SV=2	0	45.448	10	6	20	6	79.5	5.22	46.46	1.148	RABL6
High	IsMasterProtein	Q9Y5K8	V-type proton ATPase subunit D OS=Homo sapiens OX=9606 GN=ATP6V1D PE=1 SV=1	0	15.593	21	3	11	3	28.2	9.36	23.45	1.141	ATP6V1D
High	IsMasterProtein	Q16629	Serine/arginine-rich splicing factor 7 OS=Homo sapiens OX=9606 GN=SRSF7 PE=1 SV=1	0	99.498	38	11	107	10	27.4	11.82	259.33	1.136	SRSF7
High	IsMasterProtein	P09651	Heterogeneous nuclear ribonucleoprotein A1 OS=Homo sapiens OX=9606 GN=HNRNPA1 PE=1 SV=5	0	161.829	43	16	122	11	38.7	9.13	363.4	1.134	HNRNPA1
High	IsMasterProtein	Q15436	Protein transport protein Sec23A OS=Homo sapiens OX=9606 GN=SEC23A PE=1 SV=2	0	32.325	9	5	14	4	86.1	7.08	31.09	1.131	SEC23A
High	IsMasterProtein	P61006	Ras-related protein Rab-8A OS=Homo sapiens OX=9606 GN=RAB8A PE=1 SV=1	0	15.866	18	3	8	2	23.7	9.07	6.4	1.125	RAB8A
High	IsMasterProtein	P31150	Rab GDP dissociation inhibitor alpha OS=Homo sapiens OX=9606 GN=GDI1 PE=1 SV=2	0	66.167	24	8	29	3	50.6	5.14	68.94	1.112	GDI1
High	IsMasterProtein	E9PRG8	Uncharacterized protein C11orf98 OS=Homo sapiens OX=9606 GN=C11orf98 PE=4 SV=2	0	29.927	41	5	28	5	14.2	11.53	62.88	1.105
High	IsMasterProtein	Q5VWQ0	Lysine-specific demethylase 9 OS=Homo sapiens OX=9606 GN=RSBN1 PE=1 SV=2	0	5.38	2	2	4	1	90	8.6	6.46	1.102	RSBN1
High	IsMasterProtein	Q6PKG0	La-related protein 1 OS=Homo sapiens OX=9606 GN=LARP1 PE=1 SV=2	0	117.844	25	18	63	18	123.4	8.82	113.59	1.097	LARP1
High	IsMasterProtein	Q14157	Ubiquitin-associated protein 2-like OS=Homo sapiens OX=9606 GN=UBAP2L PE=1 SV=2	0	10.688	4	3	5	3	114.5	7.11	4.25	1.095	UBAP2L
High	IsMasterProtein	O00505	Importin subunit alpha-4 OS=Homo sapiens OX=9606 GN=KPNA3 PE=1 SV=2	0	15.064	10	3	6	2	57.8	4.94	9.06	1.081	KPNA3
High	IsMasterProtein	P52569	Cationic amino acid transporter 2 OS=Homo sapiens OX=9606 GN=SLC7A2 PE=1 SV=2	0	10.918	3	2	3	2	71.6	7.28	9.44	1.081	SLC7A2
High	IsMasterProtein	Q16790	Carbonic anhydrase 9 OS=Homo sapiens OX=9606 GN=CA9 PE=1 SV=2	0	17.979	12	3	10	3	49.7	4.72	13.63	1.062	CA9
High	IsMasterProtein	Q16881	Thioredoxin reductase 1, cytoplasmic OS=Homo sapiens OX=9606 GN=TXNRD1 PE=1 SV=3	0	129.46	37	15	50	15	70.9	7.39	118.56	1.061	TXNRD1
High	IsMasterProtein	Q96G03	Phosphoglucomutase-2 OS=Homo sapiens OX=9606 GN=PGM2 PE=1 SV=4	0	38.786	21	9	20	9	68.2	6.73	33.47	1.057	PGM2
High	IsMasterProtein	Q99536	Synaptic vesicle membrane protein VAT-1 homolog OS=Homo sapiens OX=9606 GN=VAT1 PE=1 SV=2	0	11.735	11	3	6	3	41.9	6.29	9.14	1.057	VAT1
High	IsMasterProtein	P39019	40S ribosomal protein S19 OS=Homo sapiens OX=9606 GN=RPS19 PE=1 SV=2	0	136.638	59	14	268	14	16.1	10.32	741.97	1.056	RPS19
High	IsMasterProtein	Q9H2G2	STE20-like serine/threonine-protein kinase OS=Homo sapiens OX=9606 GN=SLK PE=1 SV=1	0	75.349	16	14	29	13	142.6	5.15	69	1.048	SLK
High	IsMasterProtein	O75116	Rho-associated protein kinase 2 OS=Homo sapiens OX=9606 GN=ROCK2 PE=1 SV=4	0	56.833	12	11	28	8	160.8	6.02	57.87	1.046	ROCK2
High	IsMasterProtein	Q06210	Glutamine--fructose-6-phosphate aminotransferase [isomerizing] 1 OS=Homo sapiens OX=9606 GN=GFPT1 PE=1 SV=3	0	68.243	23	11	40	11	78.8	7.11	84.94	1.03	GFPT1
High	IsMasterProtein	P42696	RNA-binding protein 34 OS=Homo sapiens OX=9606 GN=RBM34 PE=1 SV=2	0	35.631	22	7	19	7	48.5	10.11	42.4	1.026	RBM34
High	IsMasterProtein	Q13310	Polyadenylate-binding protein 4 OS=Homo sapiens OX=9606 GN=PABPC4 PE=1 SV=1	0	122.678	32	24	86	14	70.7	9.26	216.21	1.02	PABPC4
High	IsMasterProtein	O15446	DNA-directed RNA polymerase I subunit RPA34 OS=Homo sapiens OX=9606 GN=CD3EAP PE=1 SV=1	0	86.219	46	12	44	12	55	8.51	88.51	1.02	CD3EAP
High	IsMasterProtein	Q06265	Exosome complex component RRP45 OS=Homo sapiens OX=9606 GN=EXOSC9 PE=1 SV=3	0	20.791	11	4	15	4	48.9	5.29	35.69	1.007	EXOSC9
High	IsMasterProtein	P78330	Phosphoserine phosphatase OS=Homo sapiens OX=9606 GN=PSPH PE=1 SV=2	0	18.112	25	4	9	4	25	5.69	17.52	0.997	PSPH
High	IsMasterProtein	P62081	40S ribosomal protein S7 OS=Homo sapiens OX=9606 GN=RPS7 PE=1 SV=1	0	333.06	80	21	355	21	22.1	10.1	1078	0.99	RPS7
High	IsMasterProtein	P30086	Phosphatidylethanolamine-binding protein 1 OS=Homo sapiens OX=9606 GN=PEBP1 PE=1 SV=3	0	29.337	37	3	11	3	21	7.53	40.49	0.981	PEBP1
High	IsMasterProtein	P62424	60S ribosomal protein L7a OS=Homo sapiens OX=9606 GN=RPL7A PE=1 SV=2	0	199.834	52	25	258	25	30	10.61	718.07	0.98	RPL7A
High	IsMasterProtein	Q96KR1	Zinc finger RNA-binding protein OS=Homo sapiens OX=9606 GN=ZFR PE=1 SV=2	0	43.128	11	7	13	7	116.9	9.04	24.64	0.979	ZFR
High	IsMasterProtein	Q14919	Dr1-associated corepressor OS=Homo sapiens OX=9606 GN=DRAP1 PE=1 SV=3	0	32.757	20	5	19	5	22.3	5.17	36.69	0.977	DRAP1
High	IsMasterProtein	P28066	Proteasome subunit alpha type-5 OS=Homo sapiens OX=9606 GN=PSMA5 PE=1 SV=3	0	36.48	31	5	18	5	26.4	4.79	46.86	0.975	PSMA5
High	IsMasterProtein	Q9UJA5	tRNA (adenine(58)-N(1))-methyltransferase non-catalytic subunit TRM6 OS=Homo sapiens OX=9606 GN=TRMT6 PE=1 SV=1	0	14.862	8	3	6	3	55.8	7.55	12.13	0.975	TRMT6
High	IsMasterProtein	O96019	Actin-like protein 6A OS=Homo sapiens OX=9606 GN=ACTL6A PE=1 SV=1	0	52.324	27	7	22	7	47.4	5.6	70.57	0.97	ACTL6A
High	IsMasterProtein	P49591	Serine--tRNA ligase, cytoplasmic OS=Homo sapiens OX=9606 GN=SARS PE=1 SV=3	0	47.282	24	9	26	9	58.7	6.43	49.61	0.966	SARS
High	IsMasterProtein	Q96AE4	Far upstream element-binding protein 1 OS=Homo sapiens OX=9606 GN=FUBP1 PE=1 SV=3	0	14.896	7	3	10	3	67.5	7.61	16.69	0.958	FUBP1
High	IsMasterProtein	Q9NR46	Endophilin-B2 OS=Homo sapiens OX=9606 GN=SH3GLB2 PE=1 SV=1	0	11.94	12	3	3	3	43.9	5.99	4.69	0.958	SH3GLB2
High	IsMasterProtein	P05198	Eukaryotic translation initiation factor 2 subunit 1 OS=Homo sapiens OX=9606 GN=EIF2S1 PE=1 SV=3	0	186.026	73	23	127	23	36.1	5.08	322.67	0.941	EIF2S1
High	IsMasterProtein	Q9Y3B8	Oligoribonuclease, mitochondrial OS=Homo sapiens OX=9606 GN=REXO2 PE=1 SV=3	0	27.799	20	4	11	4	26.8	6.87	25.77	0.928	REXO2
High	IsMasterProtein	A0FGR8	Extended synaptotagmin-2 OS=Homo sapiens OX=9606 GN=ESYT2 PE=1 SV=1	0	27.847	6	4	12	4	102.3	9.26	30.82	0.925	ESYT2
High	IsMasterProtein	P62304	Small nuclear ribonucleoprotein E OS=Homo sapiens OX=9606 GN=SNRPE PE=1 SV=1	0	17.997	39	2	14	2	10.8	9.44	30.63	0.923	SNRPE
High	IsMasterProtein	P18669	Phosphoglycerate mutase 1 OS=Homo sapiens OX=9606 GN=PGAM1 PE=1 SV=2	0	260.733	65	16	183	16	28.8	7.18	579.02	0.92	PGAM1; LOC643576
High	IsMasterProtein	Q06203	Amidophosphoribosyltransferase OS=Homo sapiens OX=9606 GN=PPAT PE=1 SV=1	0	12.053	7	2	4	2	57.4	6.76	6.82	0.92	PPAT
High	IsMasterProtein	P36871	Phosphoglucomutase-1 OS=Homo sapiens OX=9606 GN=PGM1 PE=1 SV=3	0	134.658	62	23	84	23	61.4	6.76	161.16	0.918	PGM1
High	IsMasterProtein	P16989	Y-box-binding protein 3 OS=Homo sapiens OX=9606 GN=YBX3 PE=1 SV=4	0	53.237	20	7	32	2	40.1	9.77	74.84	0.915	CSDA; YBX3
High	IsMasterProtein	Q9Y6A4	Cilia- and flagella-associated protein 20 OS=Homo sapiens OX=9606 GN=CFAP20 PE=1 SV=1	0	17.454	25	4	8	4	22.8	9.76	15.12	0.897	C16orf80; CFAP20
High	IsMasterProtein	O43670	BUB3-interacting and GLEBS motif-containing protein ZNF207 OS=Homo sapiens OX=9606 GN=ZNF207 PE=1 SV=1	0	32.088	11	4	25	4	50.7	9.1	65.82	0.895	ZNF207
High	IsMasterProtein	Q14914	Prostaglandin reductase 1 OS=Homo sapiens OX=9606 GN=PTGR1 PE=1 SV=2	0	64.531	39	12	49	12	35.8	8.29	90.13	0.892	PTGR1
High	IsMasterProtein	P37802	Transgelin-2 OS=Homo sapiens OX=9606 GN=TAGLN2 PE=1 SV=3	0	35.043	45	6	18	6	22.4	8.25	35.99	0.891	TAGLN2
High	IsMasterProtein	Q9BUL9	Ribonuclease P protein subunit p25 OS=Homo sapiens OX=9606 GN=RPP25 PE=1 SV=1	0	6.158	10	2	4	2	20.6	9.61	6.08	0.889	RPP25
High	IsMasterProtein	Q9NPD8	Ubiquitin-conjugating enzyme E2 T OS=Homo sapiens OX=9606 GN=UBE2T PE=1 SV=1	0	13.469	14	2	4	2	22.5	7.99	10.98	0.888	UBE2T
High	IsMasterProtein	P61254	60S ribosomal protein L26 OS=Homo sapiens OX=9606 GN=RPL26 PE=1 SV=1	0	127.671	68	15	169	3	17.2	10.55	488.56	0.887	RPL26
High	IsMasterProtein	Q96RS6	NudC domain-containing protein 1 OS=Homo sapiens OX=9606 GN=NUDCD1 PE=1 SV=2	0.007	2.165	2	2	2	2	66.7	5.11	1.77	0.876	NUDCD1
High	IsMasterProtein	Q9UNF0	Protein kinase C and casein kinase substrate in neurons protein 2 OS=Homo sapiens OX=9606 GN=PACSIN2 PE=1 SV=2	0	19.906	9	4	17	4	55.7	5.2	45.98	0.872	PACSIN2
High	IsMasterProtein	Q9Y3C1	Nucleolar protein 16 OS=Homo sapiens OX=9606 GN=NOP16 PE=1 SV=2	0	87.955	48	9	54	9	21.2	9.94	128.79	0.869	NOP16
High	IsMasterProtein	Q9Y3Y2	Chromatin target of PRMT1 protein OS=Homo sapiens OX=9606 GN=CHTOP PE=1 SV=2	0	66.333	35	8	60	8	26.4	12.23	158.64	0.865	CHTOP
High	IsMasterProtein	P62913	60S ribosomal protein L11 OS=Homo sapiens OX=9606 GN=RPL11 PE=1 SV=2	0	50.667	35	8	85	8	20.2	9.6	217.49	0.861	RPL11
High	IsMasterProtein	P62308	Small nuclear ribonucleoprotein G OS=Homo sapiens OX=9606 GN=SNRPG PE=1 SV=1	0	9.834	26	2	13	2	8.5	8.88	20.68	0.856	SNRPG
High	IsMasterProtein	O43684	Mitotic checkpoint protein BUB3 OS=Homo sapiens OX=9606 GN=BUB3 PE=1 SV=1	0	82.301	43	10	63	10	37.1	6.84	166.82	0.855	BUB3
High	IsMasterProtein	P61221	ATP-binding cassette sub-family E member 1 OS=Homo sapiens OX=9606 GN=ABCE1 PE=1 SV=1	0	91.874	36	16	79	16	67.3	8.34	174.32	0.854	ABCE1
High	IsMasterProtein	Q9UIJ7	GTP:AMP phosphotransferase AK3, mitochondrial OS=Homo sapiens OX=9606 GN=AK3 PE=1 SV=4	0	26.355	28	5	18	5	25.6	9.16	30.68	0.854	AK3
High	IsMasterProtein	Q6P1J9	Parafibromin OS=Homo sapiens OX=9606 GN=CDC73 PE=1 SV=1	0	25.189	13	5	18	5	60.5	9.61	30.27	0.852	CDC73
High	IsMasterProtein	Q16851	UTP--glucose-1-phosphate uridylyltransferase OS=Homo sapiens OX=9606 GN=UGP2 PE=1 SV=5	0	88.938	35	14	54	14	56.9	8.15	98.84	0.85	UGP2
High	IsMasterProtein	Q7L7X3	Serine/threonine-protein kinase TAO1 OS=Homo sapiens OX=9606 GN=TAOK1 PE=1 SV=1	0	16.521	4	4	12	3	116	7.65	24.4	0.846	TAOK1
High	IsMasterProtein	Q99590	Protein SCAF11 OS=Homo sapiens OX=9606 GN=SCAF11 PE=1 SV=2	0	41.862	9	7	15	7	164.6	8.41	40.08	0.843	SCAF11
High	IsMasterProtein	P0DN79	Cystathionine beta-synthase-like protein OS=Homo sapiens OX=9606 GN=CBSL PE=1 SV=1	0	7.931	3	2	8	2	60.5	6.65	14.72	0.83	CBS; LOC102724560; CBSL
High	IsMasterProtein	Q15257	Serine/threonine-protein phosphatase 2A activator OS=Homo sapiens OX=9606 GN=PTPA PE=1 SV=3	0	28.806	21	6	17	6	40.6	5.94	30.28	0.826	PPP2R4; PTPA
High	IsMasterProtein	Q8N257	Histone H2B type 3-B OS=Homo sapiens OX=9606 GN=HIST3H2BB PE=1 SV=3	0	130.748	53	8	1216	1	13.9	10.32	1901.16	0.82	HIST3H2BB
High	IsMasterProtein	Q4G0J3	La-related protein 7 OS=Homo sapiens OX=9606 GN=LARP7 PE=1 SV=1	0	160.325	42	22	129	22	66.9	9.55	307.51	0.818	LARP7
High	IsMasterProtein	Q8IV48	3'-5' exoribonuclease 1 OS=Homo sapiens OX=9606 GN=ERI1 PE=1 SV=3	0	15.795	11	3	9	3	40	6.7	10.7	0.818	ERI1
High	IsMasterProtein	Q9NXF1	Testis-expressed protein 10 OS=Homo sapiens OX=9606 GN=TEX10 PE=1 SV=2	0	7.49	2	2	4	2	105.6	9.36	5	0.815	TEX10
High	IsMasterProtein	P35637	RNA-binding protein FUS OS=Homo sapiens OX=9606 GN=FUS PE=1 SV=1	0	66.248	20	7	25	5	53.4	9.36	75.48	0.814	FUS
High	IsMasterProtein	P30419	Glycylpeptide N-tetradecanoyltransferase 1 OS=Homo sapiens OX=9606 GN=NMT1 PE=1 SV=2	0	106.993	38	14	94	14	56.8	7.8	232.39	0.798	NMT1
High	IsMasterProtein	O00422	Histone deacetylase complex subunit SAP18 OS=Homo sapiens OX=9606 GN=SAP18 PE=1 SV=1	0	27.138	26	4	6	4	17.6	9.35	23.64	0.794	SAP18
High	IsMasterProtein	Q14847	LIM and SH3 domain protein 1 OS=Homo sapiens OX=9606 GN=LASP1 PE=1 SV=2	0	23.971	21	5	20	5	29.7	7.05	39.25	0.787	LASP1
High	IsMasterProtein	P00491	Purine nucleoside phosphorylase OS=Homo sapiens OX=9606 GN=PNP PE=1 SV=2	0	17.624	20	4	8	4	32.1	6.95	7.91	0.784	PNP
High	IsMasterProtein	P62306	Small nuclear ribonucleoprotein F OS=Homo sapiens OX=9606 GN=SNRPF PE=1 SV=1	0	7.834	24	2	2	2	9.7	4.67	5.76	0.78	SNRPF
High	IsMasterProtein	Q9Y2S7	Polymerase delta-interacting protein 2 OS=Homo sapiens OX=9606 GN=POLDIP2 PE=1 SV=1	0	13.411	13	2	4	2	42	8.63	11.22	0.77	POLDIP2
High	IsMasterProtein	Q96CT7	Coiled-coil domain-containing protein 124 OS=Homo sapiens OX=9606 GN=CCDC124 PE=1 SV=1	0	123.361	58	16	135	16	25.8	9.54	331.15	0.755	CCDC124
High	IsMasterProtein	Q86WR0	Coiled-coil domain-containing protein 25 OS=Homo sapiens OX=9606 GN=CCDC25 PE=1 SV=2	0	9.025	11	2	5	2	24.5	6.8	8.01	0.752	CCDC25
High	IsMasterProtein	P62879	Guanine nucleotide-binding protein G(I)/G(S)/G(T) subunit beta-2 OS=Homo sapiens OX=9606 GN=GNB2 PE=1 SV=3	0	75.071	36	9	36	5	37.3	6	82.3	0.748	GNB2
High	IsMasterProtein	Q16836	Hydroxyacyl-coenzyme A dehydrogenase, mitochondrial OS=Homo sapiens OX=9606 GN=HADH PE=1 SV=3	0	66.865	33	7	48	7	34.3	8.85	112.61	0.743	HADH
High	IsMasterProtein	P29353	SHC-transforming protein 1 OS=Homo sapiens OX=9606 GN=SHC1 PE=1 SV=4	0	21.489	9	4	10	4	62.8	6.44	17.38	0.74	SHC1
High	IsMasterProtein	Q5QNW6	Histone H2B type 2-F OS=Homo sapiens OX=9606 GN=HIST2H2BF PE=1 SV=3	0	132.757	55	9	1242	4	13.9	10.32	1953.4	0.725	HIST2H2BF
High	IsMasterProtein	O43809	Cleavage and polyadenylation specificity factor subunit 5 OS=Homo sapiens OX=9606 GN=NUDT21 PE=1 SV=1	0	53.184	65	12	63	12	26.2	8.82	112.47	0.718	NUDT21
High	IsMasterProtein	Q9UNX3	60S ribosomal protein L26-like 1 OS=Homo sapiens OX=9606 GN=RPL26L1 PE=1 SV=1	0	122.653	68	15	168	3	17.2	10.55	474.12	0.713	RPL26L1
High	IsMasterProtein	Q7Z739	YTH domain-containing family protein 3 OS=Homo sapiens OX=9606 GN=YTHDF3 PE=1 SV=1	0	19.02	9	5	11	5	63.8	9.04	14.7	0.711	YTHDF3
High	IsMasterProtein	Q29RF7	Sister chromatid cohesion protein PDS5 homolog A OS=Homo sapiens OX=9606 GN=PDS5A PE=1 SV=1	0	24.923	6	4	7	4	150.7	7.91	17.05	0.704	PDS5A
High	IsMasterProtein	Q9NTK5	Obg-like ATPase 1 OS=Homo sapiens OX=9606 GN=OLA1 PE=1 SV=2	0	116.753	54	17	99	17	44.7	7.81	223.67	0.695	OLA1
High	IsMasterProtein	Q9BTT0	Acidic leucine-rich nuclear phosphoprotein 32 family member E OS=Homo sapiens OX=9606 GN=ANP32E PE=1 SV=1	0	39.839	28	6	24	6	30.7	3.85	51.14	0.692	ANP32E
High	IsMasterProtein	Q96K17	Transcription factor BTF3 homolog 4 OS=Homo sapiens OX=9606 GN=BTF3L4 PE=1 SV=1	0	25.16	37	5	27	4	17.3	6.35	62.1	0.686	BTF3L4
High	IsMasterProtein	P43307	Translocon-associated protein subunit alpha OS=Homo sapiens OX=9606 GN=SSR1 PE=1 SV=3	0	11.146	8	2	4	2	32.2	4.49	13.16	0.682	SSR1
High	IsMasterProtein	Q12906	Interleukin enhancer-binding factor 3 OS=Homo sapiens OX=9606 GN=ILF3 PE=1 SV=3	0	386.362	54	38	339	30	95.3	8.76	911.74	0.681	ILF3
High	IsMasterProtein	P46087	Probable 28S rRNA (cytosine(4447)-C(5))-methyltransferase OS=Homo sapiens OX=9606 GN=NOP2 PE=1 SV=2	0	167.347	40	24	141	24	89.2	9.23	377.61	0.677	NOP2
High	IsMasterProtein	Q16630	Cleavage and polyadenylation specificity factor subunit 6 OS=Homo sapiens OX=9606 GN=CPSF6 PE=1 SV=2	0	76.33	17	6	42	6	59.2	7.15	97.7	0.673	CPSF6
High	IsMasterProtein	Q92522	Histone H1x OS=Homo sapiens OX=9606 GN=H1FX PE=1 SV=1	0	85.624	33	8	81	8	22.5	10.76	230.34	0.672	H1FX
High	IsMasterProtein	Q13247	Serine/arginine-rich splicing factor 6 OS=Homo sapiens OX=9606 GN=SRSF6 PE=1 SV=2	0	44.398	25	8	38	7	39.6	11.43	80.23	0.664	SRSF6
High	IsMasterProtein	Q13765	Nascent polypeptide-associated complex subunit alpha OS=Homo sapiens OX=9606 GN=NACA PE=1 SV=1	0	93.234	37	7	128	7	23.4	4.56	323.46	0.66	NACA
High	IsMasterProtein	P62633	Cellular nucleic acid-binding protein OS=Homo sapiens OX=9606 GN=CNBP PE=1 SV=1	0	65.824	49	7	33	7	19.5	7.71	91.67	0.66	CNBP
High	IsMasterProtein	Q16658	Fascin OS=Homo sapiens OX=9606 GN=FSCN1 PE=1 SV=3	0	88.243	34	14	58	14	54.5	7.24	107.17	0.644	FSCN1
High	IsMasterProtein	P40222	Alpha-taxilin OS=Homo sapiens OX=9606 GN=TXLNA PE=1 SV=3	0	217.954	62	26	153	25	61.9	6.52	389.28	0.641	TXLNA
High	IsMasterProtein	P18031	Tyrosine-protein phosphatase non-receptor type 1 OS=Homo sapiens OX=9606 GN=PTPN1 PE=1 SV=1	0	7.439	5	2	3	2	49.9	6.27	6.59	0.64	PTPN1
High	IsMasterProtein	Q96IR7	4-hydroxyphenylpyruvate dioxygenase-like protein OS=Homo sapiens OX=9606 GN=HPDL PE=1 SV=1	0	9.683	7	2	2	2	39.4	7.03	2.24	0.636	HPDL
High	IsMasterProtein	Q14331	Protein FRG1 OS=Homo sapiens OX=9606 GN=FRG1 PE=1 SV=1	0	11.269	9	2	8	2	29.2	9.01	16.55	0.635	FRG1
High	IsMasterProtein	P27348	14-3-3 protein theta OS=Homo sapiens OX=9606 GN=YWHAQ PE=1 SV=1	0	114.914	62	19	99	14	27.7	4.78	234.21	0.625	YWHAQ
High	IsMasterProtein	Q09666	Neuroblast differentiation-associated protein AHNAK OS=Homo sapiens OX=9606 GN=AHNAK PE=1 SV=2	0	862.109	50	143	553	143	628.7	6.15	1164.71	0.621	AHNAK
High	IsMasterProtein	P49589	Cysteine--tRNA ligase, cytoplasmic OS=Homo sapiens OX=9606 GN=CARS PE=1 SV=3	0	58.321	18	11	34	11	85.4	6.76	63.82	0.618	CARS
High	IsMasterProtein	Q9UKM9	RNA-binding protein Raly OS=Homo sapiens OX=9606 GN=RALY PE=1 SV=1	0	115.069	58	17	111	17	32.4	9.17	295.88	0.612	RALY
High	IsMasterProtein	Q9H832	Ubiquitin-conjugating enzyme E2 Z OS=Homo sapiens OX=9606 GN=UBE2Z PE=1 SV=2	0	7.549	5	2	4	2	38.2	5.62	6.7	0.61	UBE2Z
High	IsMasterProtein	Q9Y2T3	Guanine deaminase OS=Homo sapiens OX=9606 GN=GDA PE=1 SV=1	0	32.545	17	6	16	6	51	5.68	24.7	0.595	GDA
High	IsMasterProtein	Q8NI27	THO complex subunit 2 OS=Homo sapiens OX=9606 GN=THOC2 PE=1 SV=2	0	49.63	7	9	27	9	182.7	8.44	53.13	0.587	THOC2
High	IsMasterProtein	O60749	Sorting nexin-2 OS=Homo sapiens OX=9606 GN=SNX2 PE=1 SV=2	0	76.642	29	13	56	12	58.4	5.12	119.1	0.584	SNX2
High	IsMasterProtein	Q9Y266	Nuclear migration protein nudC OS=Homo sapiens OX=9606 GN=NUDC PE=1 SV=1	0	196.584	60	27	188	27	38.2	5.38	399.15	0.583	NUDC
High	IsMasterProtein	Q09028	Histone-binding protein RBBP4 OS=Homo sapiens OX=9606 GN=RBBP4 PE=1 SV=3	0	27.192	17	7	24	2	47.6	4.89	35.77	0.583	RBBP4
High	IsMasterProtein	Q96DI7	U5 small nuclear ribonucleoprotein 40 kDa protein OS=Homo sapiens OX=9606 GN=SNRNP40 PE=1 SV=1	0	37.596	32	7	14	7	39.3	8.1	31.42	0.582	SNRNP40
High	IsMasterProtein	P60981	Destrin OS=Homo sapiens OX=9606 GN=DSTN PE=1 SV=3	0	16.794	31	5	20	4	18.5	7.85	19.93	0.576	DSTN
High	IsMasterProtein	P48163	NADP-dependent malic enzyme OS=Homo sapiens OX=9606 GN=ME1 PE=1 SV=1	0	33.2	16	6	15	6	64.1	6.13	18.52	0.576	ME1
High	IsMasterProtein	O75475	PC4 and SFRS1-interacting protein OS=Homo sapiens OX=9606 GN=PSIP1 PE=1 SV=1	0	82.145	26	10	54	10	60.1	9.13	98.61	0.571	PSIP1
High	IsMasterProtein	P23193	Transcription elongation factor A protein 1 OS=Homo sapiens OX=9606 GN=TCEA1 PE=1 SV=2	0	131.517	57	17	105	17	33.9	8.38	260.03	0.568	TCEA1
High	IsMasterProtein	Q15437	Protein transport protein Sec23B OS=Homo sapiens OX=9606 GN=SEC23B PE=1 SV=2	0	13.507	3	2	4	1	86.4	6.89	10.3	0.566	SEC23B
High	IsMasterProtein	P80723	Brain acid soluble protein 1 OS=Homo sapiens OX=9606 GN=BASP1 PE=1 SV=2	0	11.214	25	2	3	2	22.7	4.63	3.26	0.563	BASP1
High	IsMasterProtein	P49748	Very long-chain specific acyl-CoA dehydrogenase, mitochondrial OS=Homo sapiens OX=9606 GN=ACADVL PE=1 SV=1	0	66.337	20	10	32	10	70.3	8.75	73.16	0.562	ACADVL
High	IsMasterProtein	Q07157	Tight junction protein ZO-1 OS=Homo sapiens OX=9606 GN=TJP1 PE=1 SV=3	0	28.474	5	6	13	6	195.3	6.7	21	0.556	TJP1
High	IsMasterProtein	P67809	Y-box-binding protein 1 OS=Homo sapiens OX=9606 GN=YBX1 PE=1 SV=3	0	175.412	55	15	85	10	35.9	9.88	275.89	0.555	YBX1
High	IsMasterProtein	P07737	Profilin-1 OS=Homo sapiens OX=9606 GN=PFN1 PE=1 SV=2	0	79.3	64	10	70	10	15	8.27	160.72	0.529	PFN1
High	IsMasterProtein	Q92796	Disks large homolog 3 OS=Homo sapiens OX=9606 GN=DLG3 PE=1 SV=2	0	8.066	7	4	4	4	90.3	7.03	0	0.529	DLG3
High	IsMasterProtein	P63151	Serine/threonine-protein phosphatase 2A 55 kDa regulatory subunit B alpha isoform OS=Homo sapiens OX=9606 GN=PPP2R2A PE=1 SV=1	0	106.816	50	15	67	15	51.7	6.2	160.97	0.516	PPP2R2A
High	IsMasterProtein	Q6DN03	Putative histone H2B type 2-C OS=Homo sapiens OX=9606 GN=HIST2H2BC PE=5 SV=3	0	14.516	13	3	38	1	21.5	10.7	54.93	0.516	HIST2H2BC
High	IsMasterProtein	P62316	Small nuclear ribonucleoprotein Sm D2 OS=Homo sapiens OX=9606 GN=SNRPD2 PE=1 SV=1	0	80.781	62	8	115	8	13.5	9.91	250.74	0.508	SNRPD2
High	IsMasterProtein	Q01469	Fatty acid-binding protein 5 OS=Homo sapiens OX=9606 GN=FABP5 PE=1 SV=3	0	13.995	25	3	12	3	15.2	7.01	12.34	0.506	FABP5
High	IsMasterProtein	Q16181	Septin-7 OS=Homo sapiens OX=9606 GN=SEPTIN7 PE=1 SV=2	0	121.03	39	16	80	15	50.6	8.63	196.09	0.505	2020-09-07
High	IsMasterProtein	P78362	SRSF protein kinase 2 OS=Homo sapiens OX=9606 GN=SRPK2 PE=1 SV=3	0	33.97	11	6	21	5	77.5	4.97	39.91	0.504	SRPK2
High	IsMasterProtein	Q9NUQ3	Gamma-taxilin OS=Homo sapiens OX=9606 GN=TXLNG PE=1 SV=2	0	139.004	48	22	105	21	60.5	7.52	254.93	0.503	TXLNG
High	IsMasterProtein	P17275	Transcription factor jun-B OS=Homo sapiens OX=9606 GN=JUNB PE=1 SV=1	0	7.052	9	2	5	2	35.9	9.22	7.12	0.501	JUNB
High	IsMasterProtein	O60568	Multifunctional procollagen lysine hydroxylase and glycosyltransferase LH3 OS=Homo sapiens OX=9606 GN=PLOD3 PE=1 SV=1	0	25.899	11	6	11	6	84.7	6.05	14.87	0.488	PLOD3
High	IsMasterProtein	Q07955	Serine/arginine-rich splicing factor 1 OS=Homo sapiens OX=9606 GN=SRSF1 PE=1 SV=2	0	10.537	17	3	8	3	27.7	10.36	7.48	0.483	SRSF1
High	IsMasterProtein	P31946	14-3-3 protein beta/alpha OS=Homo sapiens OX=9606 GN=YWHAB PE=1 SV=3	0	68.453	47	10	60	4	28.1	4.83	139.38	0.479	YWHAB
High	IsMasterProtein	Q9H788	SH2 domain-containing protein 4A OS=Homo sapiens OX=9606 GN=SH2D4A PE=1 SV=1	0	25.429	13	5	13	5	52.7	8.06	34.3	0.472	SH2D4A
High	IsMasterProtein	Q01844	RNA-binding protein EWS OS=Homo sapiens OX=9606 GN=EWSR1 PE=1 SV=1	0	50.092	11	5	24	5	68.4	9.33	42.12	0.47	EWSR1
High	IsMasterProtein	Q9HB71	Calcyclin-binding protein OS=Homo sapiens OX=9606 GN=CACYBP PE=1 SV=2	0	136.47	67	15	101	15	26.2	8.25	286.03	0.466	CACYBP
High	IsMasterProtein	Q99598	Translin-associated protein X OS=Homo sapiens OX=9606 GN=TSNAX PE=1 SV=1	0	48.847	46	11	33	11	33.1	6.55	58.76	0.465	TSNAX
High	IsMasterProtein	Q7L7L0	Histone H2A type 3 OS=Homo sapiens OX=9606 GN=HIST3H2A PE=1 SV=3	0	106.484	35	6	869	2	14.1	11.05	786.43	0.462	HIST3H2A
High	IsMasterProtein	Q99497	Protein/nucleic acid deglycase DJ-1 OS=Homo sapiens OX=9606 GN=PARK7 PE=1 SV=2	0	41.418	42	6	31	6	19.9	6.79	66.78	0.462	PARK7
High	IsMasterProtein	Q13630	GDP-L-fucose synthase OS=Homo sapiens OX=9606 GN=TSTA3 PE=1 SV=1	0	13.129	12	3	11	3	35.9	6.6	11.51	0.458	TSTA3
High	IsMasterProtein	Q13162	Peroxiredoxin-4 OS=Homo sapiens OX=9606 GN=PRDX4 PE=1 SV=1	0	29.747	16	4	38	2	30.5	6.29	76.13	0.445	PRDX4
High	IsMasterProtein	P98082	Disabled homolog 2 OS=Homo sapiens OX=9606 GN=DAB2 PE=1 SV=3	0	7.135	3	2	5	2	82.4	5.53	5.28	0.443	DAB2
High	IsMasterProtein	Q9NRN7	L-aminoadipate-semialdehyde dehydrogenase-phosphopantetheinyl transferase OS=Homo sapiens OX=9606 GN=AASDHPPT PE=1 SV=2	0	30.7	17	4	15	4	35.8	6.8	49.17	0.428	AASDHPPT
High	IsMasterProtein	Q99933	BAG family molecular chaperone regulator 1 OS=Homo sapiens OX=9606 GN=BAG1 PE=1 SV=4	0	15.411	14	4	12	4	38.8	7.81	8.56	0.425	BAG1
High	IsMasterProtein	Q5SRE5	Nucleoporin NUP188 homolog OS=Homo sapiens OX=9606 GN=NUP188 PE=1 SV=1	0	25.424	5	6	15	6	195.9	6.73	8.76	0.423	NUP188
High	IsMasterProtein	Q8NCW5	NAD(P)H-hydrate epimerase OS=Homo sapiens OX=9606 GN=NAXE PE=1 SV=2	0	8.081	16	3	11	3	31.7	7.66	1.68	0.423	APOA1BP; NAXE
High	IsMasterProtein	Q9ULX3	RNA-binding protein NOB1 OS=Homo sapiens OX=9606 GN=NOB1 PE=1 SV=1	0	29.093	17	5	17	5	46.6	7.18	30.74	0.419	NOB1
High	IsMasterProtein	Q04917	14-3-3 protein eta OS=Homo sapiens OX=9606 GN=YWHAH PE=1 SV=4	0	47.42	41	11	51	6	28.2	4.84	91.95	0.417	YWHAH
High	IsMasterProtein	P07305	Histone H1.0 OS=Homo sapiens OX=9606 GN=H1-0 PE=1 SV=3	0	16.736	21	4	12	4	20.9	10.84	26.48	0.416	H1F0
High	IsMasterProtein	Q9NVM6	DnaJ homolog subfamily C member 17 OS=Homo sapiens OX=9606 GN=DNAJC17 PE=1 SV=1	0	26.327	22	5	11	5	34.7	8.53	20.17	0.415	DNAJC17
High	IsMasterProtein	P49642	DNA primase small subunit OS=Homo sapiens OX=9606 GN=PRIM1 PE=1 SV=1	0	15.353	14	4	5	4	49.9	8.21	10.47	0.414	PRIM1
High	IsMasterProtein	O75367	Core histone macro-H2A.1 OS=Homo sapiens OX=9606 GN=H2AFY PE=1 SV=4	0	128.229	45	15	108	15	39.6	9.79	259.45	0.413	H2AFY
High	IsMasterProtein	P31350	Ribonucleoside-diphosphate reductase subunit M2 OS=Homo sapiens OX=9606 GN=RRM2 PE=1 SV=1	0	45.104	27	8	24	8	44.8	5.38	39.97	0.413	RRM2
High	IsMasterProtein	Q9H6F5	Coiled-coil domain-containing protein 86 OS=Homo sapiens OX=9606 GN=CCDC86 PE=1 SV=1	0	57.905	32	8	40	8	40.2	10.33	115.65	0.409	CCDC86
High	IsMasterProtein	Q92598	Heat shock protein 105 kDa OS=Homo sapiens OX=9606 GN=HSPH1 PE=1 SV=1	0	61.414	22	15	40	12	96.8	5.39	64.36	0.405	HSPH1
High	IsMasterProtein	O14787	Transportin-2 OS=Homo sapiens OX=9606 GN=TNPO2 PE=1 SV=3	0	18.38	7	4	15	2	101.3	5.01	5.97	0.404	TNPO2
High	IsMasterProtein	P14678	Small nuclear ribonucleoprotein-associated proteins B and B' OS=Homo sapiens OX=9606 GN=SNRPB PE=1 SV=2	0	29.689	18	5	24	5	24.6	11.19	40.86	0.391	SNRPB
High	IsMasterProtein	Q15428	Splicing factor 3A subunit 2 OS=Homo sapiens OX=9606 GN=SF3A2 PE=1 SV=2	0	78.918	30	11	56	11	49.2	9.64	128.63	0.387	SF3A2
High	IsMasterProtein	Q9Y520	Protein PRRC2C OS=Homo sapiens OX=9606 GN=PRRC2C PE=1 SV=4	0	105.547	7	18	52	18	316.7	9.13	126.94	0.387	PRRC2C
High	IsMasterProtein	Q00577	Transcriptional activator protein Pur-alpha OS=Homo sapiens OX=9606 GN=PURA PE=1 SV=2	0.004	2.57	10	2	3	2	34.9	6.44	0	0.385	PURA
High	IsMasterProtein	P42330	Aldo-keto reductase family 1 member C3 OS=Homo sapiens OX=9606 GN=AKR1C3 PE=1 SV=4	0	68.037	36	8	30	8	36.8	7.94	66.08	0.378	AKR1C3
High	IsMasterProtein	P51608	Methyl-CpG-binding protein 2 OS=Homo sapiens OX=9606 GN=MECP2 PE=1 SV=1	0	21.666	12	4	11	4	52.4	9.95	10.43	0.37	MECP2
High	IsMasterProtein	Q15293	Reticulocalbin-1 OS=Homo sapiens OX=9606 GN=RCN1 PE=1 SV=1	0	26.185	16	4	17	4	38.9	5	41.65	0.358	RCN1
High	IsMasterProtein	O75390	Citrate synthase, mitochondrial OS=Homo sapiens OX=9606 GN=CS PE=1 SV=2	0	19.142	12	4	11	4	51.7	8.32	18.31	0.354	CS
High	IsMasterProtein	Q9P258	Protein RCC2 OS=Homo sapiens OX=9606 GN=RCC2 PE=1 SV=2	0	117.414	35	15	79	15	56	8.78	196.35	0.342	RCC2
High	IsMasterProtein	P61326	Protein mago nashi homolog OS=Homo sapiens OX=9606 GN=MAGOH PE=1 SV=1	0	22.531	42	4	11	4	17.2	6.11	27.72	0.338	MAGOH
High	IsMasterProtein	P08621	U1 small nuclear ribonucleoprotein 70 kDa OS=Homo sapiens OX=9606 GN=SNRNP70 PE=1 SV=2	0	181.459	43	20	201	20	51.5	9.94	517.95	0.334	SNRNP70
High	IsMasterProtein	Q9NZZ3	Charged multivesicular body protein 5 OS=Homo sapiens OX=9606 GN=CHMP5 PE=1 SV=1	0	13.576	23	3	11	3	24.6	4.83	18.32	0.332	CHMP5
High	IsMasterProtein	P17676	CCAAT/enhancer-binding protein beta OS=Homo sapiens OX=9606 GN=CEBPB PE=1 SV=2	0	21.981	14	4	11	4	36.1	8.31	25.28	0.33	CEBPB
High	IsMasterProtein	P61981	14-3-3 protein gamma OS=Homo sapiens OX=9606 GN=YWHAG PE=1 SV=2	0	56.683	46	11	60	5	28.3	4.89	124.55	0.327	YWHAG
High	IsMasterProtein	P62805	Histone H4 OS=Homo sapiens OX=9606 GN=H4C1 PE=1 SV=2	0	227.774	62	14	1022	14	11.4	11.36	1720.28	0.326	HIST1H4A; HIST1H4F; HIST1H4D; HIST1H4J; HIST2H4A; HIST2H4B; HIST1H4H; HIST1H4C; HIST4H4; HIST1H4E; HIST1H4I; HIST1H4B; HIST1H4K; HIST1H4L
High	IsMasterProtein	P35237	Serpin B6 OS=Homo sapiens OX=9606 GN=SERPINB6 PE=1 SV=3	0	50.015	27	8	40	8	42.6	5.27	86.38	0.324	SERPINB6
High	IsMasterProtein	P13693	Translationally-controlled tumor protein OS=Homo sapiens OX=9606 GN=TPT1 PE=1 SV=1	0	18.216	30	5	21	5	19.6	4.93	35.39	0.324	TPT1
High	IsMasterProtein	O75940	Survival of motor neuron-related-splicing factor 30 OS=Homo sapiens OX=9606 GN=SMNDC1 PE=1 SV=1	0	27.102	29	4	13	4	26.7	7.24	22.28	0.319	SMNDC1
High	IsMasterProtein	Q16763	Ubiquitin-conjugating enzyme E2 S OS=Homo sapiens OX=9606 GN=UBE2S PE=1 SV=2	0	15.727	18	3	8	3	23.8	8.38	18.25	0.318	UBE2S
High	IsMasterProtein	P62314	Small nuclear ribonucleoprotein Sm D1 OS=Homo sapiens OX=9606 GN=SNRPD1 PE=1 SV=1	0	89.951	55	5	71	5	13.3	11.56	202.83	0.309	SNRPD1
High	IsMasterProtein	P06703	Protein S100-A6 OS=Homo sapiens OX=9606 GN=S100A6 PE=1 SV=1	0	4.808	17	2	6	2	10.2	5.48	13.28	0.309	S100A6
High	IsMasterProtein	Q12894	Interferon-related developmental regulator 2 OS=Homo sapiens OX=9606 GN=IFRD2 PE=1 SV=3	0	8.152	5	2	7	2	54.8	7.94	9.24	0.303	IFRD2
High	IsMasterProtein	P20290	Transcription factor BTF3 OS=Homo sapiens OX=9606 GN=BTF3 PE=1 SV=1	0	173.966	73	17	159	16	22.2	9.38	426.29	0.297	BTF3
High	IsMasterProtein	Q9NTM9	Copper homeostasis protein cutC homolog OS=Homo sapiens OX=9606 GN=CUTC PE=1 SV=1	0	31.161	22	4	13	4	29.3	8.18	32.51	0.292	CUTC
High	IsMasterProtein	P31949	Protein S100-A11 OS=Homo sapiens OX=9606 GN=S100A11 PE=1 SV=2	0	23.697	42	4	16	4	11.7	7.12	46.58	0.289	S100A11
High	IsMasterProtein	P16401	Histone H1.5 OS=Homo sapiens OX=9606 GN=H1-5 PE=1 SV=3	0	51.413	17	6	41	6	22.6	10.92	88.46	0.284	HIST1H1B
High	IsMasterProtein	Q92466	DNA damage-binding protein 2 OS=Homo sapiens OX=9606 GN=DDB2 PE=1 SV=1	0	39.608	23	9	25	9	47.8	9.47	41.1	0.283	DDB2
High	IsMasterProtein	P48147	Prolyl endopeptidase OS=Homo sapiens OX=9606 GN=PREP PE=1 SV=2	0	17.675	8	3	8	3	80.6	5.86	2.02	0.283	PREP
High	IsMasterProtein	P31939	Bifunctional purine biosynthesis protein PURH OS=Homo sapiens OX=9606 GN=ATIC PE=1 SV=3	0	172.673	52	22	116	22	64.6	6.71	264.7	0.282	ATIC
High	IsMasterProtein	P09661	U2 small nuclear ribonucleoprotein A' OS=Homo sapiens OX=9606 GN=SNRPA1 PE=1 SV=2	0	161.956	64	19	191	19	28.4	8.62	477.84	0.281	SNRPA1
High	IsMasterProtein	P50395	Rab GDP dissociation inhibitor beta OS=Homo sapiens OX=9606 GN=GDI2 PE=1 SV=2	0	177.457	68	25	126	20	50.6	6.47	257.38	0.281	GDI2
High	IsMasterProtein	Q8IUE6	Histone H2A type 2-B OS=Homo sapiens OX=9606 GN=HIST2H2AB PE=1 SV=3	0	48.268	35	4	215	3	14	10.89	192.96	0.277	HIST2H2AB
High	IsMasterProtein	O75822	Eukaryotic translation initiation factor 3 subunit J OS=Homo sapiens OX=9606 GN=EIF3J PE=1 SV=2	0	89.509	46	15	85	15	29	4.83	225.93	0.277	EIF3J
High	IsMasterProtein	P49902	Cytosolic purine 5'-nucleotidase OS=Homo sapiens OX=9606 GN=NT5C2 PE=1 SV=1	0	108.958	31	15	66	15	64.9	6.14	129.24	0.277	NT5C2
High	IsMasterProtein	Q9BRJ6	Uncharacterized protein C7orf50 OS=Homo sapiens OX=9606 GN=C7orf50 PE=1 SV=1	0	82.312	47	11	53	11	22.1	9.64	151.2	0.274	C7orf50
High	IsMasterProtein	Q15014	Mortality factor 4-like protein 2 OS=Homo sapiens OX=9606 GN=MORF4L2 PE=1 SV=1	0	16.897	15	3	5	3	32.3	9.72	14.98	0.273	MORF4L2
High	IsMasterProtein	P50579	Methionine aminopeptidase 2 OS=Homo sapiens OX=9606 GN=METAP2 PE=1 SV=1	0	199.266	50	17	125	17	52.9	5.82	304.94	0.269	METAP2
High	IsMasterProtein	P68431	Histone H3.1 OS=Homo sapiens OX=9606 GN=H3C1 PE=1 SV=2	0	38.03	52	7	241	1	15.4	11.12	326.91	0.267	HIST1H3F; HIST1H3C; HIST1H3D; HIST1H3G; HIST1H3H; HIST1H3B; HIST1H3A; HIST1H3E; HIST1H3I; HIST1H3J
High	IsMasterProtein	Q8TBZ6	tRNA methyltransferase 10 homolog A OS=Homo sapiens OX=9606 GN=TRMT10A PE=1 SV=1	0	37.695	16	6	15	6	39.7	7.65	39.69	0.266	TRMT10A
High	IsMasterProtein	Q13228	Methanethiol oxidase OS=Homo sapiens OX=9606 GN=SELENBP1 PE=1 SV=2	0	11.405	8	2	4	2	52.4	6.37	2.38	0.262	SELENBP1
High	IsMasterProtein	P62258	14-3-3 protein epsilon OS=Homo sapiens OX=9606 GN=YWHAE PE=1 SV=1	0	71.174	44	10	74	7	29.2	4.74	169.38	0.256	YWHAE
High	IsMasterProtein	P25786	Proteasome subunit alpha type-1 OS=Homo sapiens OX=9606 GN=PSMA1 PE=1 SV=1	0	48.029	42	9	31	9	29.5	6.61	57.9	0.253	PSMA1
High	IsMasterProtein	P09038	Fibroblast growth factor 2 OS=Homo sapiens OX=9606 GN=FGF2 PE=1 SV=3	0	6.357	6	2	4	2	30.8	11.18	1.76	0.251	FGF2
High	IsMasterProtein	P0DPK5	Putative histone H3.X OS=Homo sapiens OX=9606 PE=5 SV=1	0.003	2.802	9	2	105	1	16.5	11.39	151.63	0.25
High	IsMasterProtein	P61964	WD repeat-containing protein 5 OS=Homo sapiens OX=9606 GN=WDR5 PE=1 SV=1	0	27.366	20	6	15	6	36.6	8.27	15.22	0.245	WDR5
High	IsMasterProtein	Q16777	Histone H2A type 2-C OS=Homo sapiens OX=9606 GN=HIST2H2AC PE=1 SV=4	0	136.55	36	6	937	2	14	10.9	979.13	0.241	HIST2H2AC
High	IsMasterProtein	Q14444	Caprin-1 OS=Homo sapiens OX=9606 GN=CAPRIN1 PE=1 SV=2	0	68.134	22	10	37	10	78.3	5.25	77.48	0.241	CAPRIN1
High	IsMasterProtein	P19338	Nucleolin OS=Homo sapiens OX=9606 GN=NCL PE=1 SV=3	0	68.702	16	9	28	9	76.6	4.7	58.68	0.24	NCL
High	IsMasterProtein	P42226	Signal transducer and activator of transcription 6 OS=Homo sapiens OX=9606 GN=STAT6 PE=1 SV=1	0	6.482	2	2	5	2	94.1	6.23	7.24	0.24	STAT6
High	IsMasterProtein	P82979	SAP domain-containing ribonucleoprotein OS=Homo sapiens OX=9606 GN=SARNP PE=1 SV=3	0	23.759	18	3	12	3	23.7	6.42	33.56	0.238	SARNP
High	IsMasterProtein	P08579	U2 small nuclear ribonucleoprotein B'' OS=Homo sapiens OX=9606 GN=SNRPB2 PE=1 SV=1	0	82.666	47	9	60	7	25.5	9.72	145.79	0.234	SNRPB2
High	IsMasterProtein	P25789	Proteasome subunit alpha type-4 OS=Homo sapiens OX=9606 GN=PSMA4 PE=1 SV=1	0	29.817	25	5	17	5	29.5	7.72	41.21	0.231	PSMA4
High	IsMasterProtein	Q9H2K8	Serine/threonine-protein kinase TAO3 OS=Homo sapiens OX=9606 GN=TAOK3 PE=1 SV=2	0	5.987	3	2	2	1	105.3	7.3	4.31	0.231	TAOK3
High	IsMasterProtein	P00367	Glutamate dehydrogenase 1, mitochondrial OS=Homo sapiens OX=9606 GN=GLUD1 PE=1 SV=2	0	25.838	12	4	10	4	61.4	7.8	16.99	0.227	GLUD1
High	IsMasterProtein	O14818	Proteasome subunit alpha type-7 OS=Homo sapiens OX=9606 GN=PSMA7 PE=1 SV=1	0	71.446	48	11	62	11	27.9	8.46	158.17	0.226	PSMA7
High	IsMasterProtein	P27816	Microtubule-associated protein 4 OS=Homo sapiens OX=9606 GN=MAP4 PE=1 SV=3	0	375.216	47	51	305	51	120.9	5.43	754.57	0.225	MAP4
High	IsMasterProtein	P63104	14-3-3 protein zeta/delta OS=Homo sapiens OX=9606 GN=YWHAZ PE=1 SV=1	0	108.419	64	16	95	11	27.7	4.79	210.24	0.225	YWHAZ
High	IsMasterProtein	O43314	Inositol hexakisphosphate and diphosphoinositol-pentakisphosphate kinase 2 OS=Homo sapiens OX=9606 GN=PPIP5K2 PE=1 SV=3	0	15.646	5	4	11	4	140.3	8.22	10.1	0.223	PPIP5K2
High	IsMasterProtein	P40925	Malate dehydrogenase, cytoplasmic OS=Homo sapiens OX=9606 GN=MDH1 PE=1 SV=4	0	41.858	34	9	32	9	36.4	7.36	57.79	0.22	MDH1
High	IsMasterProtein	O43818	U3 small nucleolar RNA-interacting protein 2 OS=Homo sapiens OX=9606 GN=RRP9 PE=1 SV=1	0	18.997	14	5	11	5	51.8	7.85	15.08	0.22	RRP9
High	IsMasterProtein	Q00688	Peptidyl-prolyl cis-trans isomerase FKBP3 OS=Homo sapiens OX=9606 GN=FKBP3 PE=1 SV=1	0	54.79	44	11	34	11	25.2	9.28	82.11	0.219	FKBP3
High	IsMasterProtein	P53999	Activated RNA polymerase II transcriptional coactivator p15 OS=Homo sapiens OX=9606 GN=SUB1 PE=1 SV=3	0	222.398	74	16	219	16	14.4	9.6	550.1	0.213	SUB1
High	IsMasterProtein	P48634	Protein PRRC2A OS=Homo sapiens OX=9606 GN=PRRC2A PE=1 SV=3	0	49.519	5	6	17	6	228.7	9.45	47.03	0.213	PRRC2A
High	IsMasterProtein	Q6P1N9	Putative deoxyribonuclease TATDN1 OS=Homo sapiens OX=9606 GN=TATDN1 PE=1 SV=2	0	28.206	23	5	11	5	33.6	6.96	26.24	0.21	TATDN1
High	IsMasterProtein	P52907	F-actin-capping protein subunit alpha-1 OS=Homo sapiens OX=9606 GN=CAPZA1 PE=1 SV=3	0	68.873	44	9	49	8	32.9	5.69	99.71	0.209	CAPZA1
High	IsMasterProtein	Q9BRP8	Partner of Y14 and mago OS=Homo sapiens OX=9606 GN=PYM1 PE=1 SV=1	0	180.619	83	18	141	18	22.6	9.45	456.15	0.201	WIBG; PYM1
High	IsMasterProtein	P62318	Small nuclear ribonucleoprotein Sm D3 OS=Homo sapiens OX=9606 GN=SNRPD3 PE=1 SV=1	0	29.947	37	4	34	4	13.9	10.32	92.74	0.2	SNRPD3
High	IsMasterProtein	Q9Y5S9	RNA-binding protein 8A OS=Homo sapiens OX=9606 GN=RBM8A PE=1 SV=1	0	13.608	17	2	6	2	19.9	5.72	17.47	0.2	RBM8A; LOC101060541
High	IsMasterProtein	P16402	Histone H1.3 OS=Homo sapiens OX=9606 GN=H1-3 PE=1 SV=2	0	94.334	17	8	153	8	22.3	11.02	448.76	0.192	HIST1H1D
High	IsMasterProtein	P07910	Heterogeneous nuclear ribonucleoproteins C1/C2 OS=Homo sapiens OX=9606 GN=HNRNPC PE=1 SV=4	0	245.078	44	23	392	23	33.7	5.08	945.92	0.19	HNRNPC
High	IsMasterProtein	Q9HA64	Ketosamine-3-kinase OS=Homo sapiens OX=9606 GN=FN3KRP PE=1 SV=2	0	12.41	8	2	4	2	34.4	7.33	11.31	0.188	FN3KRP
High	IsMasterProtein	P30740	Leukocyte elastase inhibitor OS=Homo sapiens OX=9606 GN=SERPINB1 PE=1 SV=1	0	115.667	44	16	71	16	42.7	6.28	141.19	0.183	SERPINB1
High	IsMasterProtein	Q8NC51	Plasminogen activator inhibitor 1 RNA-binding protein OS=Homo sapiens OX=9606 GN=SERBP1 PE=1 SV=2	0	94.953	35	14	53	14	44.9	8.65	127.84	0.183	SERBP1
High	IsMasterProtein	P55072	Transitional endoplasmic reticulum ATPase OS=Homo sapiens OX=9606 GN=VCP PE=1 SV=4	0	444.32	63	52	390	52	89.3	5.26	892.83	0.176	VCP
High	IsMasterProtein	Q15404	Ras suppressor protein 1 OS=Homo sapiens OX=9606 GN=RSU1 PE=1 SV=3	0	103.525	55	16	108	16	31.5	8.65	213.87	0.174	RSU1
High	IsMasterProtein	Q9NTI5	Sister chromatid cohesion protein PDS5 homolog B OS=Homo sapiens OX=9606 GN=PDS5B PE=1 SV=1	0	9.968	4	3	3	3	164.6	8.47	2.23	0.171	PDS5B
High	IsMasterProtein	Q9UKK9	ADP-sugar pyrophosphatase OS=Homo sapiens OX=9606 GN=NUDT5 PE=1 SV=1	0	11.472	11	2	5	2	24.3	4.94	11.48	0.167	NUDT5
High	IsMasterProtein	Q9H814	Phosphorylated adapter RNA export protein OS=Homo sapiens OX=9606 GN=PHAX PE=1 SV=1	0	6.145	5	2	5	2	44.4	5.4	3.85	0.162	PHAX
High	IsMasterProtein	P34932	Heat shock 70 kDa protein 4 OS=Homo sapiens OX=9606 GN=HSPA4 PE=1 SV=4	0	167.058	40	26	112	23	94.3	5.19	188.96	0.159	HSPA4
High	IsMasterProtein	Q16531	DNA damage-binding protein 1 OS=Homo sapiens OX=9606 GN=DDB1 PE=1 SV=1	0	116.073	24	22	69	22	126.9	5.26	127.2	0.157	DDB1
High	IsMasterProtein	P23284	Peptidyl-prolyl cis-trans isomerase B OS=Homo sapiens OX=9606 GN=PPIB PE=1 SV=2	0	132.217	61	19	184	18	23.7	9.41	421.39	0.155	PPIB
High	IsMasterProtein	P20618	Proteasome subunit beta type-1 OS=Homo sapiens OX=9606 GN=PSMB1 PE=1 SV=2	0	26.332	29	5	16	5	26.5	8.13	16.35	0.155	PSMB1
High	IsMasterProtein	P26447	Protein S100-A4 OS=Homo sapiens OX=9606 GN=S100A4 PE=1 SV=1	0	34.163	55	6	52	6	11.7	6.11	61.52	0.153	S100A4
High	IsMasterProtein	Q9Y5I4	Protocadherin alpha-C2 OS=Homo sapiens OX=9606 GN=PCDHAC2 PE=2 SV=1	0	4.434	2	2	5	1	109.4	5.41	4.22	0.153	PCDHAC2
High	IsMasterProtein	P28070	Proteasome subunit beta type-4 OS=Homo sapiens OX=9606 GN=PSMB4 PE=1 SV=4	0	30.676	26	5	17	5	29.2	5.97	28.74	0.148	PSMB4
High	IsMasterProtein	Q5TDH0	Protein DDI1 homolog 2 OS=Homo sapiens OX=9606 GN=DDI2 PE=1 SV=1	0	10.202	8	2	4	2	44.5	5.05	8.51	0.145	DDI2
High	IsMasterProtein	P06748	Nucleophosmin OS=Homo sapiens OX=9606 GN=NPM1 PE=1 SV=2	0	204.862	86	22	150	22	32.6	4.78	326	0.141	NPM1
High	IsMasterProtein	Q13243	Serine/arginine-rich splicing factor 5 OS=Homo sapiens OX=9606 GN=SRSF5 PE=1 SV=1	0	29.031	25	5	16	4	31.2	11.59	37.74	0.135	SRSF5
High	IsMasterProtein	Q99707	Methionine synthase OS=Homo sapiens OX=9606 GN=MTR PE=1 SV=2	0	8.043	2	2	7	2	140.4	5.58	2.9	0.134	MTR
High	IsMasterProtein	Q8TDD1	ATP-dependent RNA helicase DDX54 OS=Homo sapiens OX=9606 GN=DDX54 PE=1 SV=2	0	25.672	12	5	18	5	98.5	10.02	24.68	0.129	DDX54
High	IsMasterProtein	Q06330	Recombining binding protein suppressor of hairless OS=Homo sapiens OX=9606 GN=RBPJ PE=1 SV=3	0	13.484	7	3	7	3	55.6	7.18	12.01	0.127	RBPJ
High	IsMasterProtein	P27695	DNA-(apurinic or apyrimidinic site) lyase OS=Homo sapiens OX=9606 GN=APEX1 PE=1 SV=2	0	272.883	69	25	215	25	35.5	8.12	646.01	0.126	APEX1
High	IsMasterProtein	P13798	Acylamino-acid-releasing enzyme OS=Homo sapiens OX=9606 GN=APEH PE=1 SV=4	0	24.86	13	8	20	8	81.2	5.48	27.72	0.125	APEH
High	IsMasterProtein	P15311	Ezrin OS=Homo sapiens OX=9606 GN=EZR PE=1 SV=4	0	114.157	26	21	111	8	69.4	6.27	212.41	0.122	EZR
High	IsMasterProtein	P35241	Radixin OS=Homo sapiens OX=9606 GN=RDX PE=1 SV=1	0	149.957	31	26	137	12	68.5	6.37	277.67	0.118	RDX
High	IsMasterProtein	P84103	Serine/arginine-rich splicing factor 3 OS=Homo sapiens OX=9606 GN=SRSF3 PE=1 SV=1	0	126.773	49	11	142	10	19.3	11.65	384.32	0.117	SRSF3
High	IsMasterProtein	Q9NRN9	Methyltransferase-like protein 5 OS=Homo sapiens OX=9606 GN=METTL5 PE=1 SV=1	0	7.644	9	2	4	2	23.7	6.68	7.62	0.117	METTL5
High	IsMasterProtein	P09012	U1 small nuclear ribonucleoprotein A OS=Homo sapiens OX=9606 GN=SNRPA PE=1 SV=3	0	34.085	27	7	30	5	31.3	9.83	51.66	0.113	SNRPA
High	IsMasterProtein	Q9H4F8	SPARC-related modular calcium-binding protein 1 OS=Homo sapiens OX=9606 GN=SMOC1 PE=1 SV=1	0	35.395	17	7	19	7	48.1	8.22	31.81	0.111	SMOC1
High	IsMasterProtein	Q9Y2S6	Translation machinery-associated protein 7 OS=Homo sapiens OX=9606 GN=TMA7 PE=1 SV=1	0	48.106	41	6	43	6	7.1	9.99	119.81	0.11	TMA7
High	IsMasterProtein	P60900	Proteasome subunit alpha type-6 OS=Homo sapiens OX=9606 GN=PSMA6 PE=1 SV=1	0	71.895	50	11	47	11	27.4	6.76	102.74	0.109	PSMA6
High	IsMasterProtein	Q14244	Ensconsin OS=Homo sapiens OX=9606 GN=MAP7 PE=1 SV=1	0.001	3.437	2	2	4	2	84	9.61	7.85	0.109	MAP7
High	IsMasterProtein	P25787	Proteasome subunit alpha type-2 OS=Homo sapiens OX=9606 GN=PSMA2 PE=1 SV=2	0	66.542	42	9	31	9	25.9	7.43	70.15	0.103	PSMA2
High	IsMasterProtein	Q01970	1-phosphatidylinositol 4,5-bisphosphate phosphodiesterase beta-3 OS=Homo sapiens OX=9606 GN=PLCB3 PE=1 SV=2	0	181.956	26	25	97	25	138.7	5.9	220.44	0.102	PLCB3
High	IsMasterProtein	P06744	Glucose-6-phosphate isomerase OS=Homo sapiens OX=9606 GN=GPI PE=1 SV=4	0	22.345	9	4	13	4	63.1	8.32	14.48	0.101	GPI
High	IsMasterProtein	P26583	High mobility group protein B2 OS=Homo sapiens OX=9606 GN=HMGB2 PE=1 SV=2	0	247.436	60	19	282	16	24	7.81	796.96	0.1	HMGB2
High	IsMasterProtein	Q9Y3E1	Hepatoma-derived growth factor-related protein 3 OS=Homo sapiens OX=9606 GN=HDGFL3 PE=1 SV=1	0	17.627	32	3	9	3	22.6	7.99	13.98	0.088	HDGFRP3; HDGFL3
High	IsMasterProtein	Q00059	Transcription factor A, mitochondrial OS=Homo sapiens OX=9606 GN=TFAM PE=1 SV=1	0	32.298	24	6	30	6	29.1	9.72	51.45	0.084	TFAM
High	IsMasterProtein	O15347	High mobility group protein B3 OS=Homo sapiens OX=9606 GN=HMGB3 PE=1 SV=4	0	137.3	56	17	101	17	23	8.37	278.82	0.082	HMGB3
High	IsMasterProtein	P29401	Transketolase OS=Homo sapiens OX=9606 GN=TKT PE=1 SV=3	0	95.446	33	18	65	18	67.8	7.66	126.76	0.082	TKT
High	IsMasterProtein	P09429	High mobility group protein B1 OS=Homo sapiens OX=9606 GN=HMGB1 PE=1 SV=3	0	330.075	69	22	432	19	24.9	5.74	1206.63	0.081	HMGB1
High	IsMasterProtein	P26038	Moesin OS=Homo sapiens OX=9606 GN=MSN PE=1 SV=3	0	376.302	58	49	309	37	67.8	6.4	724.34	0.081	MSN
High	IsMasterProtein	P17096	High mobility group protein HMG-I/HMG-Y OS=Homo sapiens OX=9606 GN=HMGA1 PE=1 SV=3	0	108.281	56	9	183	9	11.7	10.32	597.76	0.08	HMGA1
High	IsMasterProtein	P25788	Proteasome subunit alpha type-3 OS=Homo sapiens OX=9606 GN=PSMA3 PE=1 SV=2	0	48.888	38	10	42	10	28.4	5.33	81.76	0.079	PSMA3
High	IsMasterProtein	P05204	Non-histone chromosomal protein HMG-17 OS=Homo sapiens OX=9606 GN=HMGN2 PE=1 SV=3	0	237.564	62	9	112	9	9.4	9.99	487.22	0.076	HMGN2
High	IsMasterProtein	Q9Y617	Phosphoserine aminotransferase OS=Homo sapiens OX=9606 GN=PSAT1 PE=1 SV=2	0	66.302	45	14	50	14	40.4	7.66	103.85	0.071	PSAT1
High	IsMasterProtein	Q32MZ4	Leucine-rich repeat flightless-interacting protein 1 OS=Homo sapiens OX=9606 GN=LRRFIP1 PE=1 SV=2	0	53.816	11	7	21	7	89.2	4.65	56.17	0.07	LRRFIP1
High	IsMasterProtein	P36957	Dihydrolipoyllysine-residue succinyltransferase component of 2-oxoglutarate dehydrogenase complex, mitochondrial OS=Homo sapiens OX=9606 GN=DLST PE=1 SV=4	0	95.167	35	13	87	13	48.7	8.95	206.21	0.066	DLST
High	IsMasterProtein	O94992	Protein HEXIM1 OS=Homo sapiens OX=9606 GN=HEXIM1 PE=1 SV=1	0	92.046	47	11	67	11	40.6	4.89	156.14	0.064	HEXIM1
High	IsMasterProtein	P05114	Non-histone chromosomal protein HMG-14 OS=Homo sapiens OX=9606 GN=HMGN1 PE=1 SV=3	0	185.299	68	13	64	13	10.7	9.6	247.16	0.064	HMGN1
High	IsMasterProtein	P17174	Aspartate aminotransferase, cytoplasmic OS=Homo sapiens OX=9606 GN=GOT1 PE=1 SV=3	0	22.994	18	5	11	5	46.2	7.01	9.27	0.063	GOT1
High	IsMasterProtein	Q13442	28 kDa heat- and acid-stable phosphoprotein OS=Homo sapiens OX=9606 GN=PDAP1 PE=1 SV=1	0	102.017	50	10	47	10	20.6	8.87	161.45	0.058	PDAP1
High	IsMasterProtein	P51858	Hepatoma-derived growth factor OS=Homo sapiens OX=9606 GN=HDGF PE=1 SV=1	0	12.813	15	3	5	3	26.8	4.73	7.45	0.057	HDGF
High	IsMasterProtein	Q96DV4	39S ribosomal protein L38, mitochondrial OS=Homo sapiens OX=9606 GN=MRPL38 PE=1 SV=2	0	9.023	7	2	5	2	44.6	7.53	11.06	0.053	MRPL38
High	IsMasterProtein	P28062	Proteasome subunit beta type-8 OS=Homo sapiens OX=9606 GN=PSMB8 PE=1 SV=3	0	30.572	22	5	11	5	30.3	7.43	22.82	0.052	PSMB8
High	IsMasterProtein	Q15651	High mobility group nucleosome-binding domain-containing protein 3 OS=Homo sapiens OX=9606 GN=HMGN3 PE=1 SV=2	0	62.166	47	5	26	5	10.7	9.66	100.86	0.048	HMGN3
High	IsMasterProtein	P16220	Cyclic AMP-responsive element-binding protein 1 OS=Homo sapiens OX=9606 GN=CREB1 PE=1 SV=2	0	6.386	5	2	9	2	36.7	5.57	18.62	0.047	CREB1
High	IsMasterProtein	Q8WVK2	U4/U6.U5 small nuclear ribonucleoprotein 27 kDa protein OS=Homo sapiens OX=9606 GN=SNRNP27 PE=1 SV=1	0	6.831	10	2	4	2	18.8	11.62	6.59	0.047	SNRNP27
High	IsMasterProtein	P49720	Proteasome subunit beta type-3 OS=Homo sapiens OX=9606 GN=PSMB3 PE=1 SV=2	0	26.722	23	5	21	5	22.9	6.55	35.98	0.042	PSMB3
High	IsMasterProtein	Q9H1E3	Nuclear ubiquitous casein and cyclin-dependent kinase substrate 1 OS=Homo sapiens OX=9606 GN=NUCKS1 PE=1 SV=1	0	276.805	63	17	111	17	27.3	5.08	399.88	0.035	NUCKS1
High	IsMasterProtein	P05455	Lupus La protein OS=Homo sapiens OX=9606 GN=SSB PE=1 SV=2	0	193.459	63	27	139	27	46.8	7.12	294.05	0.034	SSB
High	IsMasterProtein	Q8TEA8	D-aminoacyl-tRNA deacylase 1 OS=Homo sapiens OX=9606 GN=DTD1 PE=1 SV=2	0	47.992	26	7	40	7	23.4	8.24	116.74	0.034	DTD1
High	IsMasterProtein	Q86V81	THO complex subunit 4 OS=Homo sapiens OX=9606 GN=ALYREF PE=1 SV=3	0	96.427	38	7	52	7	26.9	11.15	136.49	0.025	ALYREF
High	IsMasterProtein	P28074	Proteasome subunit beta type-5 OS=Homo sapiens OX=9606 GN=PSMB5 PE=1 SV=3	0	59.233	40	9	31	9	28.5	6.92	83.81	0.025	PSMB5
High	IsMasterProtein	P49721	Proteasome subunit beta type-2 OS=Homo sapiens OX=9606 GN=PSMB2 PE=1 SV=1	0	37.479	27	6	30	6	22.8	7.02	46.98	0.023	PSMB2
High	IsMasterProtein	Q01130	Serine/arginine-rich splicing factor 2 OS=Homo sapiens OX=9606 GN=SRSF2 PE=1 SV=4	0	68.356	23	5	78	5	25.5	11.85	198.46	0.018	SRSF2
High	IsMasterProtein	P36873	Serine/threonine-protein phosphatase PP1-gamma catalytic subunit OS=Homo sapiens OX=9606 GN=PPP1CC PE=1 SV=1	0	126.27	49	13	69	1	37	6.54	180.21	0.01	PPP1CC
High	IsMasterProtein	P62987	Ubiquitin-60S ribosomal protein L40 OS=Homo sapiens OX=9606 GN=UBA52 PE=1 SV=2	0	32.699	54	7	42	1	14.7	9.83	82.44	0.01	UBA52
High	IsMasterProtein	P28072	Proteasome subunit beta type-6 OS=Homo sapiens OX=9606 GN=PSMB6 PE=1 SV=4	0	8.526	8	2	8	2	25.3	4.92	17.71	0.01	PSMB6
High	IsMasterProtein	Q58FF8	Putative heat shock protein HSP 90-beta 2 OS=Homo sapiens OX=9606 GN=HSP90AB2P PE=1 SV=2	0	123.783	32	16	197	1	44.3	4.84	491.82		HSP90AB2P
High	IsMasterProtein	Q92804	TATA-binding protein-associated factor 2N OS=Homo sapiens OX=9606 GN=TAF15 PE=1 SV=1	0	24.106	9	4	14	2	61.8	8.02	18.77		TAF15
High	IsMasterProtein	P61758	Prefoldin subunit 3 OS=Homo sapiens OX=9606 GN=VBP1 PE=1 SV=4	0	26.28	26	4	11	4	22.6	7.11	32.74		VBP1
High	IsMasterProtein	Q2TB90	Hexokinase HKDC1 OS=Homo sapiens OX=9606 GN=HKDC1 PE=1 SV=3	0.003	2.799	3	2	10	1	102.5	7.12	1.87		HKDC1
High	IsMasterProtein	Q9BRS2	Serine/threonine-protein kinase RIO1 OS=Homo sapiens OX=9606 GN=RIOK1 PE=1 SV=2	0	15.693	6	2	4	2	65.5	6.19	13.36		RIOK1
High	IsMasterProtein	P56270	Myc-associated zinc finger protein OS=Homo sapiens OX=9606 GN=MAZ PE=1 SV=1	0	10.315	7	2	3	2	48.6	8.95	7.83		MAZ
